# Supplementary material for: Elevating acetyl-CoA levels reduces aspects of brain aging
Source: eLife. 2019 Nov 19;8:e47866. doi: 10.7554/eLife.47866 (PMC6882557; doi:10.7554/eLife.47866)
Supplement: Supplementary file 1. [file elife-47866-supp1.xlsx]

## Sheet: Instruction
Supplemental DataSet S1
Differential expression analysis performed by edgeR.
mths=months
Gene=detailed annotation for each gene
logFC=log2 fold-change
logCPM=log2 average count per million
LR=likelihood ratio statistics
Pvalue=raw p-value
FDR=adjusted p-value for multiple testing correction
GeneID=Entrez Gene ID
Symbol=gene symbol

## Sheet: 13mths_vs_9mths
Gene	13mths_rep1	13mths_rep2	13mths_rep3	13mths_rep4	13mths_rep5	13mths_rep6	9mths_rep1	9mths_rep2	9mths_rep3	9mths_rep4	9mths_rep5	logFC	logCPM	LR	PValue	FDR	GeneID	Symbol
Plcxd2|AW494639|EG433022|-|16|16 B5|protein-coding	43.8847	55.8086	41.6991	38.2418	44.1915	58.5313	82.8881	90.7335	85.1404	68.5328	72.4681	0.763456	5.95828	39.4388	3.38497e-10	3.28916e-06	433022	Plcxd2
Erbb4|Her4|c-erbB-4|-|1 C3|1 33.8 cM|protein-coding	78.3724	73.484	71.3667	56.7567	70.7959	76.8298	111.856	109.592	118.602	105.092	98.4215	0.609799	6.46674	38.8017	4.69109e-10	3.28916e-06	13869	Erbb4
Necab1|1700003H21Rik|Efcbp1|STIP-1|-|4|4 A2|protein-coding	93.0006	132.157	99.6892	103.684	95.2259	145.732	170.158	186.182	202.751	171.332	170.06	0.689985	7.15895	33.8402	5.98284e-09	1.90923e-05	69352	Necab1
Ptpn4|PTPMEG|Ptn4|TEP|TEP/mPTPMEG|hPTP-MEG|-|1 E2.3|1 52.39 cM|protein-coding	25.1877	22.8308	21.2979	7.40597	15.1568	16.7488	45.4606	44.833	42.1984	38.7217	34.1305	1.18511	4.84202	33.2578	8.07156e-09	1.90923e-05	19258	Ptpn4
Ncam2|Ncam-2|Ocam|RNCAM|-|16 C3.3|16 45.89 cM|protein-coding	38.8471	50.4078	46.2576	22.4199	42.081	48.935	74.0029	82.9945	76.5272	78.2951	67.9055	0.87176	5.84088	32.9347	9.5305e-09	1.90923e-05	17968	Ncam2
Deptor|Depdc6|-|15 D1|15 21.96 cM|protein-coding	18.9876	23.7309	13.2271	17.4377	19.8894	21.0999	33.7151	28.2875	34.2668	32.5629	31.2271	0.748954	4.65162	33.1652	8.46499e-09	1.90923e-05	97998	Deptor
Pisd-ps1|-|-|11 A1|11|pseudo	79.0505	108.835	78.9891	83.5528	74.1854	78.5583	56.841	46.79	56.7603	57.9843	53.3882	-0.623801	6.14063	32.9574	9.41988e-09	1.90923e-05	236604	Pisd-ps1
Klf12|2700063E05Rik|AI225908|AI315654|AP-2rep|B130052C06Rik|D530033K05Rik|-|14 E2.2-E2.3|14 50.9 cM|protein-coding	28.4814	31.5867	24.6607	12.3882	20.5289	21.4575	48.0775	48.3912	48.1471	41.7356	37.3303	0.951302	5.04949	32.034	1.51495e-08	2.12442e-05	16597	Klf12
Rem2|AW411893|-|14|14 C2|protein-coding	22.1845	27.1678	22.3441	20.6694	18.8022	19.1925	13.8755	12.5426	11.5256	14.0866	13.51	-0.724451	4.16145	32.0963	1.46717e-08	2.12442e-05	140743	Rem2
Egr4|NGF1-C|NGFI-C|NGFIC|pAT133|-|6 C3|6 37.48 cM|protein-coding	23.9283	24.7129	21.0737	22.8912	23.7905	14.4242	10.6501	13.8769	11.0918	13.89	10.3695	-0.865393	4.12069	32.3402	1.29411e-08	2.12442e-05	13656	Egr4
1700020I14Rik|1190006L01Rik|4933437I03Rik|AI451541|AI585852|AW538376|AW558897|Cyrano|-|2|2 E5|ncRNA	72.9474	53.681	60.8298	23.0258	48.9879	54.7166	116.055	101.408	112.467	108.172	96.3476	1.03075	6.27259	31.5949	1.89927e-08	2.42123e-05	66602	1700020I14Rik
Unc5d|D930029E11Rik|Unc5h4|mKIAA1777|-|8|8 A2|protein-coding	39.5253	39.5243	40.7276	32.519	40.5462	39.8752	58.4233	76.5008	68.3478	62.1775	45.1518	0.677949	5.63016	31.1669	2.36765e-08	2.7668e-05	210801	Unc5d
BC005561|-|-|5|5 E5|protein-coding	8.81568	10.5562	7.69714	4.51091	7.09878	5.96042	15.2144	15.3002	14.9956	14.8073	12.0286	0.967868	3.42943	30.8104	2.84504e-08	3.06893e-05	100042165	BC005561
Xkr4|AY534250|Gm210|XRG4|mKIAA1889|-|1|1 A1|protein-coding	9.39694	5.64632	10.2379	3.2317	6.20343	5.96042	23.6128	16.3676	17.7221	13.4314	11.7324	1.29513	3.51063	30.369	3.57197e-08	3.57784e-05	497097	Xkr4
C4b|C4|Ss|-|17 B1|17 18.29 cM|protein-coding	43.594	42.7975	44.9872	30.7685	43.0403	40.4712	19.231	23.395	18.0939	28.2387	30.99	-0.76998	5.05862	29.2655	6.31091e-08	5.89986e-05	12268	C4b
Gpr165|6530406P05Rik|-|X C3|X|protein-coding	8.04068	8.91956	8.14552	3.63566	6.45925	8.76181	14.1798	17.3461	13.8802	13.8245	12.3249	0.966031	3.41155	27.7488	1.38136e-07	0.000121067	76206	Gpr165
Rplp1|2410042H16Rik|Arpp1|C430017H15Rik|-|9|9 B|protein-coding	136.788	152.614	129.058	180.908	141.144	142.692	101.754	106.034	98.401	97.8853	112.82	-0.510147	6.99326	27.4897	1.57932e-07	0.000130275	56040	Rplp1
Cntnap5a|Caspr5-1|EG636808|-|1|1 E2.3|protein-coding	5.52191	8.59223	9.34119	3.02972	5.69181	5.7816	15.3361	17.8798	14.9956	11.99	10.251	1.1552	3.32107	27.0137	2.02015e-07	0.000157381	636808	Cntnap5a
Mrc1|AW259686|CD206|MR|-|2 A2|2 10.46 cM|protein-coding	2.22814	2.94591	3.36283	1.95248	3.64532	1.96694	3.40803	8.0059	7.18798	6.68293	7.28829	1.27251	2.19495	26.8358	2.21499e-07	0.000162488	17533	Mrc1
Tenm1|Odz1|Odz2|TCAP-1|Ten-m1|ten-1|-|X|X A4|protein-coding	8.13756	8.75589	11.2842	3.09704	6.07553	7.27171	16.9184	20.9933	17.2264	14.7418	12.6804	1.15245	3.54746	26.7484	2.31745e-07	0.000162488	23963	Tenm1
Myh11|AV071570|SM1|SM2|smMHC|-|16 A1|16 9.71 cM|protein-coding	11.9157	12.3564	12.4051	10.9743	20.2731	11.146	13.6321	25.7968	27.5126	39.1148	42.5446	1.17193	4.38633	26.6036	2.49772e-07	0.000166788	17880	Myh11
Lrrc10b|Gm705|SerdinR|-|19|19 A|protein-coding	48.341	94.3509	46.1081	42.0121	36.9648	33.5571	26.4122	23.395	25.7156	19.9833	25.9534	-1.04584	5.26526	26.0051	3.40515e-07	0.000191519	278795	Lrrc10b
Nkain3|C530048M05|E130310K16Rik|-|4|4 A3|protein-coding	4.55316	2.04577	5.08161	2.62575	2.94184	2.14575	12.5975	7.38322	10.8439	5.83119	5.62917	1.39629	2.53234	26.0797	3.27606e-07	0.000191519	269513	Nkain3
Usp9x|5730589N07Rik|AA407302|AA407699|AL022658|AL022749|Dffrx|FAF-X|Fafl|-|X A1.1|X 7.95 cM|protein-coding	167.886	121.273	150.58	71.636	126.947	132.023	249.699	223.454	232.68	203.96	190.325	0.77763	7.411	26.027	3.36684e-07	0.000191519	22284	Usp9x
Rora|9530021D13Rik|Nr1f1|ROR1|ROR2|ROR3|nmf267|sg|staggerer|tmgc26|-|9 C|9 37.45 cM|protein-coding	52.8941	56.2996	47.0796	35.616	47.3252	49.4715	73.7594	72.9427	75.2259	73.4467	61.8023	0.571329	5.87923	25.9999	3.41437e-07	0.000191519	19883	Rora
Hspa4l|94kDa|AI461691|APG-1|Osp94|-|3|3 B|protein-coding	118.188	102.616	106.49	88.939	100.406	112.89	159.204	144.996	154.727	137.655	132.434	0.475293	6.9502	25.1646	5.26401e-07	0.000273397	18415	Hspa4l
Dcc|C030036D22Rik|Igdcc1|-|18 E2|18 45.24 cM|protein-coding	39.5253	36.9875	43.642	30.3645	36.8369	37.5506	59.2145	54.618	57.1321	48.7461	49.0034	0.520755	5.49278	25.1806	5.22047e-07	0.000273397	13176	Dcc
Rpl35a|2810431L15Rik|Rpl35|-|16|16 B3|protein-coding	1.74376	2.04577	1.49459	2.96239	1.59882	2.32456	0.730292	0.444772	0.743584	0.851746	1.00732	-1.39546	0.664918	24.9157	5.98932e-07	0.000291693	57808	Rpl35a
Kcna3|Kca1-3|Kv1.3|Mk-3|-|3 F2.3|3 46.59 cM|protein-coding	3.29377	3.84605	3.2881	1.21189	2.49416	3.09942	5.96405	8.89545	6.01064	7.01053	5.15513	1.20285	2.2311	24.9019	6.0323e-07	0.000291693	16491	Kcna3
Gpr26|9630036A11Rik|A730021D22|-|7|7 F3|protein-coding	19.8595	14.6477	13.3766	7.4733	11.3836	14.6626	30.7331	30.1556	26.769	21.5557	19.6725	0.929761	4.26608	24.4405	7.66412e-07	0.000358247	233919	Gpr26
Lnpep|2010309L07Rik|4732490P18Rik|CAP|IRAP|PLAP|gp160|vp165|-|17|17 A3.2|protein-coding	31.194	15.3842	23.3156	5.65547	14.1976	12.3381	62.9268	45.7226	54.3436	37.0182	27.9681	1.42537	4.91407	24.2716	8.36624e-07	0.000378451	240028	Lnpep
Mmp16|MT-MMP 3|MT3-MMP|Mt3mmp|-|4 A3|4 7.08 cM|protein-coding	14.2407	12.9293	18.7571	10.7723	15.3487	14.8414	29.7594	23.7508	24.9101	21.0316	19.6132	0.717194	4.23994	24.0797	9.24283e-07	0.000405038	17389	Mmp16
Zfp804b|Gm441|-|5|5 A1|protein-coding	0.968757	1.30929	1.04621	0.201981	0.767435	0.953667	2.67774	2.66863	2.29272	2.03109	1.71838	1.38745	0.727344	23.8811	1.02471e-06	0.000422633	207618	Zfp804b
Ranbp3l|C130037N17Rik|-|15|15 A1|protein-coding	5.71566	4.90985	5.23107	6.32874	7.41854	4.94715	5.90319	10.3187	14.1281	13.6279	16.4135	1.06724	3.1424	23.9199	1.0043e-06	0.000422633	223332	Ranbp3l
Slc9a7|A530087D17Rik|NHE7|-|X|X A1.3|protein-coding	16.2751	11.2108	12.9282	4.57824	12.215	9.53667	23.4302	24.4625	21.1302	22.0799	19.3169	0.993844	4.02112	23.3631	1.34124e-06	0.00052245	236727	Slc9a7
Trip11|2610511G22Rik|3110031G15Rik|6030460N08Rik|AI450776|GMAP-210|TRIP230|-|12|12 E|protein-coding	29.2564	24.5492	23.3903	12.5902	25.5172	23.0668	41.3832	35.8486	38.7283	37.8044	36.2637	0.723805	4.90736	23.3816	1.32844e-06	0.00052245	109181	Trip11
Col3a1|AW550625|Col3a-1|Tsk-2|Tsk2|-|1 C1.1|1 23.67 cM|protein-coding	1.93751	2.53675	3.13864	1.81783	4.54066	1.4305	2.43431	7.65008	7.93156	9.95888	11.3176	1.60825	2.36826	23.2831	1.39825e-06	0.000529935	12825	Col3a1
Slc6a20a|A730081N20Rik|AU022428|Xt3s1|Xtrp3s1|-|9 F4|9 74.26 cM|protein-coding	3.29377	2.20943	2.5408	2.69308	4.02903	2.26496	2.98202	7.20531	6.63029	7.46916	9.71772	1.25792	2.26582	22.9644	1.65032e-06	0.000609013	102680	Slc6a20a
Pcsk1|Nec-1|Nec1|PC1|PC3|Phpp-1|SPC3|-|13 C1|13 40.63 cM|protein-coding	12.0126	10.8835	11.1347	7.60795	12.1511	14.901	17.4053	20.1927	19.9528	18.7384	16.9468	0.700415	3.89565	22.646	1.94763e-06	0.000700298	18548	Pcsk1
Cbln4|AI848962|-|2|2 H3|protein-coding	7.07192	11.2108	8.74335	12.4555	9.91271	13.8878	13.4495	26.0637	26.7071	15.9211	18.3689	0.92232	3.91277	22.5226	2.0769e-06	0.00071106	228942	Cbln4
Ppm1l|3222401G13|5930404J21Rik|AI481720|AW045850|PP2C|PP2Cepsilon|Pp2ce|Ppp2ce|mKIAA4175|-|3|3 E1|protein-coding	47.1784	29.8682	41.998	17.1684	34.3427	40.4116	68.1605	71.8752	59.6107	56.8049	57.3582	0.836675	5.58028	22.5206	2.07897e-06	0.00071106	242083	Ppm1l
Vps13a|4930425F11|4930516E05Rik|4930543C13Rik|9930023P20|Chac|Chorein|D330038K10Rik|mKIAA0986|-|19|19 A-B|protein-coding	63.3567	57.2816	63.0717	42.5507	59.6041	60.8558	91.5299	81.4823	82.8477	76.5916	76.4381	0.501729	6.10533	21.6596	3.25577e-06	0.00108704	271564	Vps13a
Syt10|-|-|15|15 E3|protein-coding	3.77815	6.21914	4.70796	2.28912	4.47671	4.2915	7.54635	11.3862	8.92301	7.53468	7.52531	0.995827	2.67285	21.582	3.39025e-06	0.00110562	54526	Syt10
Fn1|E330027I09|Fn|Fn-1|-|1 C3|1 36.05 cM|protein-coding	81.2787	74.957	61.7266	66.3171	73.8017	87.4989	83.6792	104.877	104.845	121.21	121.353	0.52952	6.48215	21.2471	4.03717e-06	0.00128666	14268	Fn1
Adora2a|A2AAR|A2aR|AA2AR|-|10|10 C1|protein-coding	1.55001	163.089	13.6008	3.43368	2.04649	1.66892	1.64316	1.24536	1.67306	0.786227	1.24434	-4.54056	4.10655	21.0348	4.51027e-06	0.00137494	11540	Adora2a
Mybpc1|8030451F13Rik|-|10|10 C1|protein-coding	1.16251	1.63662	1.34513	1.34654	1.47092	3.39744	3.71232	5.42622	4.89526	3.99666	3.08123	1.25718	1.5981	21.0458	4.48441e-06	0.00137494	109272	Mybpc1
C2cd4b|3300001A09Rik|Fam148b|-|9|9 C|protein-coding	2.32502	0.736477	2.39134	1.88516	1.91859	1.60931	0.730292	0.711636	0.433757	0.982784	0.533289	-1.41121	0.496649	20.9614	4.68635e-06	0.00139823	75697	C2cd4b
Acvr2a|ActrIIa|Acvr2|TactrII|-|2 C1.1|2 28.38 cM|protein-coding	49.0191	54.0083	68.0786	59.3824	65.9994	71.7038	79.9061	97.4941	93.7536	87.8609	76.5567	0.50264	6.19463	20.8982	4.84349e-06	0.00141299	11480	Acvr2a
Rxfp1|Gm1018|Lgr7|-|3|3 E3|protein-coding	5.61879	7.03745	3.88593	3.43368	4.73252	10.1327	11.3195	13.699	12.517	10.8761	10.7843	1.02166	3.12428	20.8377	4.99886e-06	0.00141299	381489	Rxfp1
Akap12|AI317366|SSeCKS|Srcs5|Tsga12|-|10|10 A1|protein-coding	25.7689	31.3412	26.0059	25.8536	32.68	33.1995	34.9931	43.7656	40.4014	44.6184	41.8928	0.493815	5.11935	20.7214	5.3118e-06	0.00141299	83397	Akap12
Abca5|ABC13|B930033A02Rik|mKIAA1888|-|11|11 E1|protein-coding	66.9411	65.1373	65.1641	51.7072	66.7029	68.6044	81.6101	87.4422	84.025	89.6954	85.1485	0.418333	6.20919	20.7112	5.34041e-06	0.00141299	217265	Abca5
Kcnma1|5730414M22Rik|BKCa|MaxiK|Slo|Slo1|mSlo|mSlo1|-|14|14 A3|protein-coding	72.7536	44.025	53.88	22.8239	38.8194	43.5706	99.8065	91.801	91.3369	77.3779	65.6539	0.891464	5.99826	20.8013	5.09477e-06	0.00141299	16531	Kcnma1
Hecw1|9330116H24Rik|AV273951|E130207I19Rik|Nedl1|-|13 A1|13 5.29 cM|protein-coding	54.0566	76.1026	60.6804	40.6655	58.2611	68.8428	101.024	84.6846	90.4074	91.4644	80.1119	0.583278	6.19915	20.7433	5.2515e-06	0.00141299	94253	Hecw1
Col12a1|-|-|9 E1|9 43.82 cM|protein-coding	6.29692	10.0652	10.5369	8.34855	9.97666	8.16577	12.6584	16.2787	12.2691	15.2659	14.3988	0.663866	3.51806	20.4681	6.0634e-06	0.00157458	12816	Col12a1
Pak3|PAK-3|Pak65alpha|Pak65beta|Stk4|-|X|X F2|protein-coding	142.698	117.836	152.224	126.104	143.446	158.964	193.649	186.982	188.623	192.822	176.993	0.42132	7.34	20.2535	6.7829e-06	0.00169851	18481	Pak3
Lingo2|B230217C06Rik|Lern3|Lrrn6c|-|4|4 A5|protein-coding	9.20319	12.2746	12.7787	14.4753	15.5406	17.464	19.4136	23.3061	23.4229	21.6868	19.7317	0.649041	4.12121	20.2771	6.69984e-06	0.00169851	242384	Lingo2
Arfgef3|9630004D11|B930094H20Rik|BIG3|D10Bwg1379e|mKIAA1244|-|10 A3|10 7.79 cM|protein-coding	39.2346	21.4397	30.0413	13.1961	23.9184	25.6894	60.6142	49.5476	48.6428	39.3114	36.3822	0.876536	5.14602	20.1487	7.16483e-06	0.00173269	215821	Arfgef3
Fut9|AI746471|AU067636|mFUT9|mFuc-TIX|-|4 A3|4 10.59 cM|protein-coding	80.6974	113.581	77.4945	68.6062	75.4645	103.056	146.302	121.779	127.835	132.479	112.109	0.566947	6.72206	20.1483	7.16651e-06	0.00173269	14348	Fut9
Fam135b|1700010C24Rik|A830008O07Rik|-|15|15 D3|protein-coding	18.3095	8.75589	13.2271	3.90497	7.93016	8.16577	32.4371	24.1067	25.4058	18.6729	15.2876	1.21163	4.0133	19.9453	7.96891e-06	0.00189404	70363	Fam135b
Reln|reeler|rl|-|5 A3|5 9.98 cM|protein-coding	72.7536	121.437	91.6184	73.7231	80.0051	91.1348	126.097	163.32	160.304	118.458	109.976	0.616367	6.7818	19.7421	8.86275e-06	0.00205999	19699	Reln
Ssbp4|1210002E11Rik|AW743380|Sspb4|-|8|8 B3.3|protein-coding	109.663	108.835	117.55	125.296	106.801	103.652	85.2615	94.2028	81.7943	76.7227	84.2597	-0.407715	6.63758	19.721	8.96096e-06	0.00205999	76900	Ssbp4
Rps21|1810049N11Rik|2410030A14Rik|-|2|2 H4|protein-coding	81.0849	90.6685	74.4306	124.151	70.9238	73.79	60.0665	58.621	56.3265	41.67	61.506	-0.625568	6.17433	19.3961	1.06223e-05	0.0023761	66481	Rps21
Rab3c|2700062I01Rik|3110015B08Rik|3110037E15Rik|AI850886|-|13|13 D2.1|protein-coding	482.635	364.311	449.946	348.081	404.886	457.224	568.289	656.306	662.348	566.411	516.935	0.507622	8.96024	19.3867	1.06749e-05	0.0023761	67295	Rab3c
Ube3a|4732496B02|5830462N02Rik|A130086L21Rik|Hpve6a|mKIAA4216|-|7 B5|7 33.95 cM|protein-coding	62.7754	48.362	61.7266	23.8338	55.3832	51.5576	91.9559	81.8381	88.8583	86.485	75.2531	0.74697	6.05183	19.3262	1.10185e-05	0.00241426	22215	Ube3a
Ptprd|1110002J03Rik|3000002J10Rik|B230219D21Rik|R-PTP-delta|-|4 C3|4 36.94 cM|protein-coding	204.795	217.997	187.123	138.761	176.638	213.8	284.692	259.391	258.148	274.459	252.601	0.486074	7.81092	19.2303	1.15857e-05	0.0024764	19266	Ptprd
Mob1b|1110003E08Rik|AU015450|B230364F10|Mobkl1a|-|5|5 E1|protein-coding	15.4032	15.7933	14.7964	8.75251	16.1161	15.1991	20.8742	23.395	23.6708	21.6868	20.6205	0.620878	4.16961	19.1798	1.18963e-05	0.0024764	68473	Mob1b
Rpl39|2810465O16Rik|-|X|X A3.3|protein-coding	49.7941	51.4716	45.0619	69.4142	37.7962	35.8817	34.9323	22.9502	29.6814	17.428	33.8343	-0.794492	5.28658	19.1638	1.19968e-05	0.0024764	67248	Rpl39
Ubald2|1110014K08Rik|D030012E24Rik|Fam100b|-|11|11 E2|protein-coding	5.13441	4.17337	5.23107	5.99211	3.70927	5.06635	2.98202	2.9355	2.47861	1.76901	2.78496	-0.915593	1.98268	19.1341	1.21851e-05	0.0024764	319370	Ubald2
Tomm7|1110020J08Rik|AW047273|Tom7|-|5|5 A3|protein-coding	34.1971	31.8322	33.6283	46.9943	32.2962	30.6365	22.639	25.2631	23.4229	19.2626	27.731	-0.562332	4.90322	19.1354	1.21765e-05	0.0024764	66169	Tomm7
Cabp1|caldendrin|-|5|5 F|protein-coding	63.9379	74.466	62.7728	77.8974	58.1332	65.207	56.2933	43.8545	47.0317	49.5323	47.048	-0.458913	5.87936	19.0771	1.25543e-05	0.00251499	29867	Cabp1
Zkscan16|XM_143800|Zfp483|-|4|4 B3|protein-coding	29.9346	26.3495	27.2015	11.8496	22.7033	29.8021	36.6363	46.5232	41.8266	44.3563	36.6785	0.742472	5.01364	18.998	1.30858e-05	0.00258185	100041581	Zkscan16
Lingo3|AI851712|LERN2|-|10|10 C1|protein-coding	55.8973	87.9681	48.5742	39.7229	37.7322	42.7362	32.0111	31.223	29.9293	27.78	32.8269	-0.758763	5.40728	18.9733	1.32563e-05	0.00258185	237403	Lingo3
Usp34|A530081C03Rik|Murr2|-|11 A3.2|11 14.29 cM|protein-coding	154.032	130.929	142.509	108.598	135.836	143.944	188.963	189.384	187.507	178.867	164.905	0.420283	7.29466	18.8814	1.39102e-05	0.00267209	17847	Usp34
Gmps|670032|AA591640|AI047208|Gm9479|-|3|3 E1|protein-coding	45.6284	31.423	45.3608	26.2575	38.7555	42.319	55.137	54.4401	56.8222	57.1325	55.7584	0.545833	5.53707	18.7849	1.46322e-05	0.00270466	229363	Gmps
Dcp2|2410015D23Rik|5730537H01Rik|AL118268|-|18|18 B3|protein-coding	81.3756	65.792	76.7472	62.3448	81.476	78.3795	102.789	102.742	101.437	96.5094	91.8443	0.413832	6.42186	18.7799	1.46703e-05	0.00270466	70640	Dcp2
Satb1|2610306G12Rik|AW413156|-|17|17 C|protein-coding	127.973	79.6214	108.806	124.084	122.086	160.335	194.318	154.87	184.223	187.777	171.719	0.567384	7.20063	18.7566	1.48512e-05	0.00270466	20230	Satb1
Arid5b|4930580B11|5430435G07Rik|AI467247|Desrt|Mrf2|Mrf2alpha|Mrf2beta|-|10|10 B5.2|protein-coding	26.9314	17.2663	25.0344	14.1387	25.837	23.8417	34.628	30.1556	37.7369	34.463	34.6046	0.63186	4.80058	18.8119	1.44268e-05	0.00270466	71371	Arid5b
Pcdh7|-|-|5|5 C1|protein-coding	101.913	104.907	102.828	76.0795	92.2201	109.433	144.902	142.594	135.084	134.576	114.598	0.45666	6.84062	18.7209	1.51312e-05	0.00272031	54216	Pcdh7
Slitrk4|6430513G13|D930039I09Rik|-|X|X A7.1|protein-coding	31.6783	25.6949	27.7247	15.9565	23.9184	26.4046	39.1315	38.0725	42.1984	36.232	33.3602	0.586104	4.95803	18.6854	1.54157e-05	0.00273639	245446	Slitrk4
Dnajb14|5730496F10Rik|-|3|3 G3|protein-coding	23.347	12.1928	15.469	6.39607	11.8313	14.7818	29.0899	26.7753	25.5297	24.8317	23.3462	0.892901	4.28876	18.56	1.6464e-05	0.00285031	70604	Dnajb14
Fmod|AI131919|AU041740|SLRR2E|-|1 E4|1 58.09 cM|protein-coding	7.36255	9.90153	8.51917	6.86736	16.7557	6.37765	5.11204	27.398	26.2733	30.7284	35.4341	1.42424	4.05509	18.5636	1.64329e-05	0.00285031	14264	Fmod
Aff2|FMR2P|Fmr2|Ox19|Oxh|-|X|X A7.1-A7.2|protein-coding	14.1438	7.93759	12.8535	5.25151	10.6162	12.8149	18.4399	21.8828	19.5191	17.4936	16.5912	0.825803	3.85416	18.432	1.76078e-05	0.00301115	14266	Aff2
Tnks|4930554K12Rik|AI662855|ARTD5|C86528|D130072O21Rik|TANK1|mTNKS1|-|8 A4|8 21.16 cM|protein-coding	82.3443	67.7559	74.8042	35.1447	63.6971	67.4123	102.606	107.991	103.234	96.0508	97.4735	0.639198	6.35432	18.3986	1.79186e-05	0.00302738	21951	Tnks
Ptgds|21kDa|L-PGDS|PGD2|PGDS|PGDS2|Ptgs3|-|2 A3|2 17.28 cM|protein-coding	67.038	109.899	84.7433	111.763	174.4	87.8565	64.7525	288.924	262.237	251.593	415.195	1.27547	7.44807	18.2303	1.95735e-05	0.00323128	19215	Ptgds
Appbp2|1300003O07Rik|AI465480|PAT1|-|11|11 C|protein-coding	34.1971	31.0139	33.2546	20.2654	31.4009	36.1797	44.7304	46.5232	43.0659	43.308	44.6778	0.518164	5.22105	18.2291	1.95863e-05	0.00323128	66884	Appbp2
Tnr|J1-tenascin|TN-R|janusin|restrictin|-|1|1 H1|protein-coding	54.6379	29.6227	41.1012	16.6971	30.1218	27.3583	87.9393	75.1665	65.8692	49.5978	43.2557	0.954436	5.56998	18.072	2.12706e-05	0.00345238	21960	Tnr
Tulp4|1110057P05Rik|2210038L17Rik|Tusp|-|17 A1|17 3.72 cM|protein-coding	52.6035	49.835	48.9478	29.3546	40.8659	39.2195	73.0292	66.36	64.8777	61.2602	55.2251	0.56351	5.72792	18.0588	2.14189e-05	0.00345238	68842	Tulp4
Atp5k|2610008D24Rik|Atp5i|Lfm1|-|5 F|5 53.11 cM|protein-coding	26.2533	26.6768	26.6784	39.5883	25.1975	25.9278	20.0222	20.6374	18.2798	16.4453	20.5613	-0.566397	4.60441	17.989	2.22185e-05	0.00354056	11958	Atp5k
Zfp871|4732483N19|9030612M13Rik|AI118577|AI265322|mKIAA3006|-|17|17 B1|protein-coding	145.701	129.293	140.417	88.8043	128.162	121.235	191.336	171.771	182.55	170.349	156.55	0.47518	7.20922	17.9603	2.25564e-05	0.00355402	208292	Zfp871
Zfp369|B930030B22Rik|D230020H11Rik|NRIF2|-|13|13 B3|protein-coding	14.4345	10.7198	13.6755	4.37626	9.14527	8.88102	20.6307	18.0578	20.0768	16.6418	17.5986	0.872596	3.82394	17.8658	2.37039e-05	0.00369332	170936	Zfp369
Trps1|AI115454|AI447310|D15Ertd586e|-|15 C|15 19.18 cM|protein-coding	50.666	50.3259	63.5948	46.9943	60.9471	56.4451	75.5243	78.6357	77.2708	65.1258	72.5866	0.427912	5.9916	17.7004	2.58574e-05	0.00395434	83925	Trps1
C1qa|AI255395|C1q|-|4 D3|4 69.05 cM|protein-coding	37.8784	40.1789	31.3864	37.8378	31.7846	27.5967	24.5865	27.7538	23.7947	24.111	22.9907	-0.482258	4.91019	17.6941	2.5943e-05	0.00395434	12259	C1qa
Camk2d|2810011D23Rik|8030469K03Rik|CaMK II|[d]-CaMKII|-|3|3 G1|protein-coding	57.3504	104.252	58.5132	78.032	63.5053	97.2144	95.9116	154.069	141.777	111.579	108.673	0.677469	6.60742	17.5161	2.84888e-05	0.00429569	108058	Camk2d
Pcdh9|-|-|14 E2.1|14 45.8 cM|protein-coding	139.017	101.879	143.854	123.343	134.493	169.455	189.511	185.292	187.197	191.512	173.438	0.453441	7.3062	17.3342	3.13489e-05	0.00467665	211712	Pcdh9
Kcnip2|KChIP2|-|19 C3|19 38.75 cM|protein-coding	146.67	228.881	169.561	160.238	156.173	149.368	129.444	118.487	124.55	110.399	127.101	-0.465313	7.20417	17.2202	3.32884e-05	0.00491372	80906	Kcnip2
Slc17a6|2900073D12Rik|DNPI|VGLUT2|-|7|7 B4|protein-coding	20.6345	10.7198	11.06	21.41	23.8544	39.2195	41.2006	45.4557	39.5959	42.2597	38.0413	0.962416	4.93216	16.9415	3.85493e-05	0.005631	140919	Slc17a6
Nek10|Gm282|-|14|14 A1-A2|protein-coding	0.581254	0.736477	0.822025	0.336635	1.34301	0.596042	1.15629	2.22386	1.92093	2.09661	1.48136	1.23582	0.437681	16.9051	3.92959e-05	0.00568089	674895	Nek10
Oaz1|AZ-1|AZ1|Antizyme|ODC-Az|Oaz|-|10 C1|10 39.72 cM|protein-coding	25.8658	30.0319	25.408	35.616	23.2789	21.5767	20.2047	16.8124	18.2178	14.8728	20.265	-0.574231	4.52575	16.783	4.19078e-05	0.0057756	18245	Oaz1
Ccdc186|1810028B20Rik|A630007B06Rik|AI159700|Otg1|-|19|19 D2|protein-coding	28.2877	19.5576	19.1308	12.1862	21.4882	22.1727	34.4454	32.6463	32.8416	30.8594	27.257	0.629645	4.68202	16.8497	4.04594e-05	0.0057756	213993	Ccdc186
Sowaha|A830006N08Rik|Ankrd43|-|11|11 B1.3|protein-coding	170.792	175.936	172.027	166.028	160.97	156.223	134.739	119.911	137.439	137.262	129.886	-0.340009	7.23972	16.7783	4.20104e-05	0.0057756	237761	Sowaha
Csmd3|4930500N14Rik|mKIAA1894|-|15|15 B3.3|protein-coding	28.4814	29.1318	31.3117	19.3229	24.494	25.0337	40.6529	39.7626	37.4271	38.5251	30.1605	0.506178	4.97424	16.8013	4.15049e-05	0.0057756	239420	Csmd3
Pisd|9030221M09Rik|-|5|5 B1|protein-coding	51.3441	54.172	50.293	61.8062	47.1973	51.3788	40.6529	36.4713	40.7732	40.0321	42.6632	-0.391927	5.55793	16.8272	4.09419e-05	0.0057756	320951	Pisd
Cntnap5b|C230078M14Rik|Caspr5-2|-|1|1 E1.1|protein-coding	8.23443	6.46463	11.8073	3.09704	8.24993	10.5499	16.675	15.4781	15.2435	14.3486	13.8063	0.903888	3.51647	16.7073	4.36134e-05	0.00589082	241175	Cntnap5b
Atp8a2|AI415030|Atpc1b|agil|wl|-|14|14 C3-D1|protein-coding	10.8501	9.81969	9.93903	7.60795	6.26739	7.92735	18.1964	17.7909	14.314	10.8761	10.9621	0.727795	3.51599	16.6901	4.40094e-05	0.00589082	50769	Atp8a2
Abca8b|Abca8|-|11 E1|11 72.88 cM|protein-coding	27.9002	27.8225	30.7886	21.1407	30.0579	31.2326	40.1052	41.008	37.9228	39.8355	33.775	0.450892	5.04548	16.6859	4.41087e-05	0.00589082	27404	Abca8b
Slc22a6|NKT|Oat1|Orctl1|mOat1|-|19 A|19 5.44 cM|protein-coding	2.32502	3.35506	2.76499	3.36635	5.05228	2.26496	2.49516	8.9844	7.49781	7.2726	10.9028	1.21222	2.40214	16.6229	4.55971e-05	0.00603215	18399	Slc22a6
Qrfpr|AQ27|Gpr103|SP9155|-|3|3 B|protein-coding	0.67813	1.22746	0.747295	1.81783	0.383718	1.66892	1.88659	4.00295	3.53202	2.29316	2.25167	1.32796	1.00775	16.581	4.66166e-05	0.00610939	229214	Qrfpr
Dmxl2|6330586A12|6430411K14Rik|E130119P06Rik|mKIAA0856|-|9|9 A5.3|protein-coding	270.574	196.721	272.165	177.743	237.137	248.907	371.536	322.549	333.002	307.087	297.101	0.480436	8.10863	16.438	5.02683e-05	0.00646709	235380	Dmxl2
Ajap1|Gm573|-|4|4 E2|protein-coding	54.541	54.0083	51.5634	49.4854	49.5635	48.6966	43.8783	37.9836	38.2946	39.639	40.056	-0.357756	5.53193	16.4455	5.00679e-05	0.00646709	230959	Ajap1
March1|2900024D24Rik|BB085186|-|8|8 B3.1|protein-coding	32.3565	30.0319	33.1799	27.7387	32.0404	36.7758	40.4703	39.4068	46.412	45.5357	39.7597	0.401987	5.20435	16.4167	5.08348e-05	0.00648052	72925	2017-03-01
Dync2h1|4432416O06Rik|AI448217|D030010H02Rik|D330044F14Rik|DHC1b|DHC2|Dnchc2|b2b414Clo|mKIAA1997|-|9 A1|9 2.46 cM|protein-coding	26.7377	28.3135	25.8564	22.2179	26.6684	29.206	35.6017	39.4068	34.0809	34.5285	32.3529	0.407304	4.9352	16.2706	5.49079e-05	0.00687885	110350	Dync2h1
Atrx|4833408C14Rik|AI447451|ATR2|DXHXS6677E|HP1-BP38|Hp1bp2|Hp1bp38|MRXS3|RAD54L|Rad54|XH2|Xnp|ZNF-HX|-|X D|X 47.26 cM|protein-coding	226.302	200.322	221.648	155.727	201.58	206.171	286.031	253.342	279.154	270.921	251.89	0.410057	7.85954	16.2695	5.49405e-05	0.00687885	22589	Atrx
Ttbk2|2610507N02Rik|AI326283|B930008N24Rik|TTK|Ttbk|Ttbk1|mKIAA0847|-|2|2 E5|protein-coding	116.154	110.062	96.5505	75.137	97.2724	108.539	147.215	146.419	146.734	126.517	119.338	0.448313	6.87532	16.14	5.88285e-05	0.00716459	140810	Ttbk2
Gkn3|1190003M12Rik|-|6|6 D1|protein-coding	0.387503	1.0638	0.822025	1.27921	1.47092	1.13248	2.19087	2.04595	1.98289	2.62076	1.89614	1.01898	0.771169	16.1712	5.78675e-05	0.00716459	68888	Gkn3
Plcxd3|B130016O10Rik|-|15|15 A1|protein-coding	6.29692	7.4466	7.0993	2.89506	5.69181	6.31804	10.5284	12.2757	12.7029	10.5485	7.22903	0.83977	3.04104	16.1259	5.92664e-05	0.00716459	239318	Plcxd3
Lmbrd2|9930036E21Rik|-|15|15 A1|protein-coding	34.294	21.5215	33.0304	9.02182	27.0521	28.2524	48.4427	44.5662	49.5723	45.6012	42.9002	0.857544	5.13305	16.1413	5.87886e-05	0.00716459	320506	Lmbrd2
Nhs|Gm389|Gm48|Nhs1|Xcat|-|X F4|X 74.17 cM|protein-coding	2.71252	4.41886	1.94297	1.54852	1.98254	2.02654	3.77317	6.22681	5.57688	3.73458	5.56991	1.03799	1.8954	16.0286	6.23933e-05	0.00729117	195727	Nhs
Acta2|0610041G09Rik|Actvs|SMalphaA|a-SMA|alphaSMA|-|19|19 C1|protein-coding	8.81568	12.8474	11.3589	13.5327	18.6103	7.80815	9.67636	19.0363	26.5212	34.6595	39.1079	1.08386	4.2167	16.0478	6.17642e-05	0.00729117	11475	Acta2
Scai|9330112M16|A930041I02Rik|AI662729|-|2|2 B|protein-coding	95.6163	78.1484	96.7	60.123	83.2667	92.3268	125.975	115.374	113.521	112.234	110.687	0.454444	6.62489	16.0399	6.20212e-05	0.00729117	320271	Scai
Zfp81|AA409460|AA409461|C330034P10Rik|D330034E10Rik|Hszfp36|KRAB13|Zfp78|-|17|17 B1|protein-coding	11.9157	8.91956	9.8643	6.39607	8.95341	8.76181	13.4495	12.6315	13.5084	15.0038	13.036	0.575149	3.4948	16.0305	6.23288e-05	0.00729117	224694	Zfp81
Ybx1|1700102N10Rik|C79409|EF1A|MSY1|Nsep1|YB-1|dbpB|mYB-1a|-|4|4 D2.1|protein-coding	50.8597	63.2552	51.1897	60.4597	56.2146	53.763	44.9129	41.9865	44.0574	40.7528	43.1372	-0.380863	5.64907	16.0109	6.29785e-05	0.00729874	22608	Ybx1
Pfdn5|1190001O17Rik|1700010A06Rik|D15Ertd697e|Eig1|MM-1|-|15 F3|15 57.48 cM|protein-coding	67.2317	74.2205	64.7905	87.6598	62.9297	65.4454	50.6335	50.793	51.927	53.9221	57.0027	-0.412647	5.96663	15.9217	6.60189e-05	0.0075578	56612	Pfdn5
Ndufa1|1810049F12Rik|MWFE|-|X|X A3.3|protein-coding	27.2221	27.2497	25.408	38.5111	29.9939	30.2789	22.9433	20.1927	21.3161	18.3453	23.05	-0.49274	4.70085	15.9139	6.62918e-05	0.0075578	54405	Ndufa1
Rev3l|Rev|Rev3|Sez4|-|10|10 B1|protein-coding	57.9316	43.8613	58.8121	45.6477	56.4704	54.1206	73.2726	70.1851	67.2944	75.7399	64.2317	0.40964	5.92699	15.8343	6.91379e-05	0.00781871	19714	Rev3l
Atp2b4|Pmca4|-|1 E4|1 57.95 cM|protein-coding	117.898	269.223	130.777	133.509	123.365	158.607	204.664	307.96	254.987	261.683	232.455	0.697819	7.64161	15.5978	7.83452e-05	0.00850943	381290	Atp2b4
Rps27l|1810034D23Rik|-|9|9 C|protein-coding	10.5594	8.42857	7.02457	9.76242	8.12202	7.03329	4.86861	4.62563	5.32902	3.93114	6.755	-0.723649	2.81725	15.5981	7.83347e-05	0.00850943	67941	Rps27l
Unc5c|B130051O18Rik|Unc5h3|rcm|-|3 H1|3 65.57 cM|protein-coding	63.0661	39.5243	64.7158	48.6101	63.4413	73.79	83.6792	86.1969	87.4951	85.6988	75.7271	0.507997	6.13646	15.5946	7.84798e-05	0.00850943	22253	Unc5c
Pgr|9930019P03Rik|BB114106|ENSMUSG00000074510|NR3C3|PR|PR-A|PR-B|-|9|9 A1|protein-coding	18.697	18.9847	17.3372	14.4753	14.8371	19.5502	30.0028	21.9718	27.2028	22.9316	21.2723	0.514474	4.38026	15.5569	8.0058e-05	0.00850943	18667	Pgr
Nwd2|3110047P20Rik|B830017A01Rik|Hn1-ps2|mKIAA1239|-|5|5 C3.1|protein-coding	41.269	36.9875	35.7954	32.8556	34.8544	42.5574	49.173	55.6855	52.2988	48.0909	42.5446	0.405749	5.42814	15.5864	7.88203e-05	0.00850943	319807	Nwd2
Ndufa2|AV000592|B8|C1-B8|CI-B8|-|18|18 B2|protein-coding	39.8159	44.3523	35.1976	56.5547	41.2496	36.9546	30.2462	31.0451	34.5147	25.7489	29.3902	-0.488848	5.20727	15.6109	7.7805e-05	0.00850943	17991	Ndufa2
Epm2aip1|A930003G21Rik|mKIAA0766|-|9|9 F3|protein-coding	185.129	181.91	185.254	140.31	182.714	196.455	238.988	241.244	243.028	227.154	214.086	0.382706	7.66852	15.5559	8.01002e-05	0.00850943	77781	Epm2aip1
Peg3|AL022617|ASF-1|End4|Gcap4|Pw1|Zfp102|mKIAA0287|-|7 A1|7 3.89 cM|protein-coding	280.164	303.51	246.832	141.185	248.713	263.152	373.057	389.709	361.506	383.548	327.973	0.570538	8.2379	15.567	7.96323e-05	0.00850943	18616	Peg3
Col19a1|-|-|1|1 A5|protein-coding	68.0067	52.699	61.5771	44.7051	51.8658	56.2067	77.35	73.0316	75.102	75.8709	69.8609	0.412776	6.00775	15.5211	8.1589e-05	0.00860242	12823	Col19a1
Elavl4|Elav|Hud|PNEM|-|4 C7|4 51.42 cM|protein-coding	76.4349	73.6477	70.993	79.3112	76.104	100.016	105.162	100.43	110.236	116.034	93.6219	0.403204	6.51204	15.4879	8.30347e-05	0.00868952	15572	Elavl4
Rnf152|A930029B02Rik|-|1|1 E2.1|protein-coding	6.20004	13.7476	5.52998	4.78022	11.9592	8.94062	17.4661	14.0548	13.7563	15.9211	16.7097	0.868615	3.57607	15.4095	8.65509e-05	0.00892429	320311	Rnf152
Cdkl5|BC038161|Stk9|-|X F4|X 73.95 cM|protein-coding	44.5628	27.9043	29.1445	7.13666	22.1277	24.2589	61.5271	54.0843	55.521	48.1564	43.1372	1.02364	5.25099	15.4148	8.63102e-05	0.00892429	382253	Cdkl5
Vstm2l|Gm691|-|2|2 H1|protein-coding	66.8442	70.62	67.0324	66.7884	59.4762	59.0081	46.0692	57.2867	45.6065	49.9254	50.9588	-0.379282	5.8639	15.317	9.08931e-05	0.00930361	277432	Vstm2l
Penk|AI326464|ENK|PPA|Penk1|-|4 A1|4 2.31 cM|protein-coding	19.1814	610.703	63.4454	25.4496	14.2615	14.0666	13.0844	18.4136	18.5896	13.5624	14.9321	-2.98533	6.22574	15.242	9.45755e-05	0.00961038	18619	Penk
Slc4a10|NCBE|mKIAA4136|-|2|2 C1.3|protein-coding	246.452	195.003	251.913	205.617	280.05	292.478	318.285	332.423	334.117	331.788	336.743	0.430832	8.15104	15.1827	9.75929e-05	0.00977379	94229	Slc4a10
Kcnq3|-|-|15 D1|15 29.16 cM|protein-coding	25.5752	14.5659	16.4405	6.26141	12.215	11.2652	41.018	28.4654	27.6365	22.604	20.265	0.965447	4.37097	15.1696	9.82746e-05	0.00977379	110862	Kcnq3
Fam208a|4732418E12|4933409E02Rik|D14Abb1e|MommeD6|-|14|14 A3|protein-coding	62.8723	69.4743	65.0147	54.8715	66.575	62.8824	90.7996	78.8136	81.2366	77.6399	77.801	0.353797	6.16574	15.1734	9.80753e-05	0.00977379	218850	Fam208a
Prdm11|8030443D09Rik|AA163972|Gm707|-|2|2 E1|protein-coding	1.74376	1.30929	1.41986	0.605943	1.85464	1.90733	2.55602	3.55818	2.78844	2.88283	2.66645	0.958015	1.17772	15.1403	9.98104e-05	0.00985663	100042784	Prdm11
Uqcr11|0710008D09Rik|AL022707|Uqcr|-|10|10 C1|protein-coding	49.116	46.4799	47.8269	68.3369	43.2961	48.041	35.7234	36.0266	38.5424	29.8766	41.241	-0.477282	5.46505	15.1224	0.000100759	0.00988075	66594	Uqcr11
Oxr1|2210416C20Rik|C7|C7B|-|15|15 B3.1|protein-coding	305.933	242.628	317.6	284.12	303.649	382.897	408.842	410.169	457.738	422.401	374.606	0.437832	8.47446	15.1078	0.000101544	0.00988857	170719	Oxr1
Scn1a|B230332M13|Nav1.1|-|2 C1.3|2 39.13 cM|protein-coding	131.654	129.211	128.012	95.2677	122.662	145.792	179.956	163.587	167.616	165.632	148.966	0.396976	7.16634	15.0716	0.000103507	0.0100102	20265	Scn1a
Olig1|AI836478|AW494459|Bhlhb6|Olg-1|Oligo1|bHLHe21|-|16|16 C3.3|protein-coding	125.357	128.065	122.183	136.741	117.801	118.076	105.345	99.1842	98.0911	90.7437	99.0141	-0.340396	6.81889	15.0113	0.000106869	0.0101947	50914	Olig1
Col23a1|2810458L13Rik|AI429655|-|11|11 B1.3|protein-coding	13.4657	11.4563	14.1239	20.6694	19.3138	20.5634	17.4053	33.6248	28.0083	28.4352	26.2497	0.681202	4.41842	15.0171	0.000106544	0.0101947	237759	Col23a1
Klhl28|2810440N09Rik|4122402F11Rik|4931401E10Rik|Btbd5|-|12|12 C1|protein-coding	10.3657	9.32871	9.8643	3.97229	9.08132	8.94062	14.119	13.4321	14.6238	12.8417	14.2211	0.693417	3.47675	14.9608	0.000109766	0.0103499	66689	Klhl28
Met|AI838057|HGF|HGFR|Par4|c-Met|-|6 A2|6 7.83 cM|protein-coding	6.68442	2.29126	6.12782	5.65547	5.37205	5.90081	8.15492	10.2298	9.72856	8.77954	8.94741	0.776507	2.8552	14.9573	0.000109972	0.0103499	17295	Met
Dsc3|5430426I24Rik|-|18 A2|18 11.11 cM|protein-coding	1.45313	1.14563	0.747295	3.70299	2.04649	4.58952	4.50346	6.13786	7.80763	4.45529	6.16246	1.32766	2.03442	14.859	0.000115854	0.0107591	13507	Dsc3
Tesc|1010001A17Rik|2410011K10Rik|TE-1|-|5 F|5 57.84 cM|protein-coding	39.1378	66.6103	42.2969	47.9368	34.4067	32.3055	28.6639	31.6678	29.4335	27.649	28.7976	-0.581508	5.21904	14.8708	0.000115129	0.0107591	57816	Tesc
Eif1|Sui1-rs1|-|11|11 D|protein-coding	68.0067	80.6852	71.8151	91.6994	73.7377	72.121	56.4759	64.5809	57.1321	56.5428	59.1359	-0.378838	6.09758	14.8226	0.000118115	0.010777	20918	Eif1
C1qb|-|-|4 D3|4 69.05 cM|protein-coding	22.9595	25.1221	16.5152	25.9882	18.8661	15.3779	15.4578	12.6315	13.8802	10.7451	15.2284	-0.609739	4.13893	14.7824	0.000120658	0.010777	12260	C1qb
Nptx2|Narp|np2|-|5 G2|5 84.58 cM|protein-coding	47.0816	55.154	36.468	33.2596	32.9358	33.6167	30.368	24.6404	26.2113	30.7939	24.1165	-0.542253	5.09271	14.8067	0.00011911	0.010777	53324	Nptx2
Nsfl1c|Munc-18c|Stxbp3a|p47|-|2|2 G3|protein-coding	31.7752	30.1137	31.6106	40.3289	31.4009	33.4379	25.1951	26.2416	25.7776	21.0971	26.0719	-0.414267	4.88246	14.7895	0.000120206	0.010777	386649	Nsfl1c
Psd|1110007H17Rik|A930015K15|Efa6|Efa6a|Psdl|mKIAA2011|-|19 C3|19 38.8 cM|protein-coding	562.557	467.417	531.85	577.666	518.402	541.861	423.934	425.825	396.083	402.024	415.077	-0.370266	8.90251	14.7869	0.00012037	0.010777	73728	Psd
Sh3bgrl3|1110004L05Rik|AU022188|-|4|4 D3|protein-coding	89.0287	94.5964	91.4689	118.832	88.383	91.0752	80.3321	64.1362	71.3841	72.0053	76.9122	-0.38875	6.4166	14.7921	0.000120039	0.010777	73723	Sh3bgrl3
Syndig1l|DSPC1|Gm261|Tmem90a|-|12|12 D1|protein-coding	4.94066	171.436	17.1878	7.80994	6.84296	5.84121	3.52974	5.95995	6.0726	4.71736	5.62917	-2.78135	4.43603	14.7568	0.000122302	0.0108228	627191	Syndig1l
Zdhhc14|B530001K09Rik|New1cp|-|17|17 A1|protein-coding	56.1879	57.3634	60.8298	58.6418	50.4589	47.5045	46.4952	38.8731	39.5959	38.132	46.2777	-0.395237	5.62168	14.7505	0.000122715	0.0108228	224454	Zdhhc14
Them6|4930572J05Rik|-|15|15 D3|protein-coding	40.5909	43.534	38.5604	41.0695	36.9648	40.65	34.6888	29.7997	30.9207	28.9594	32.5307	-0.356108	5.18301	14.7216	0.00012461	0.0108297	223626	Them6
Ptar1|1700084D09Rik|2010013L17Rik|4930428J16Rik|AI449677|-|19|19 B|protein-coding	4.65003	1.55479	3.21337	0.807924	1.66278	1.3709	7.42463	4.62563	6.19654	4.32425	3.91079	1.28313	1.90834	14.7141	0.000125109	0.0108297	72351	Ptar1
Colec12|CL-P1|SRCL|Scara4|-|18|18 A1|protein-coding	5.71566	7.61026	5.90363	3.90497	6.58715	5.06635	5.29461	9.25126	11.5256	12.121	14.5173	0.86571	3.02256	14.725	0.000124387	0.0108297	140792	Colec12
Cbln1|AI323299|-|8 C3|8 42.16 cM|protein-coding	3.1969	6.13731	3.21337	11.6476	3.96508	9.47706	10.4675	16.4566	15.7392	13.6279	10.7843	1.08693	3.27952	14.6723	0.000127915	0.0110046	12404	Cbln1
Vwc2l|A830006F12Rik|Brl|-|1|1 C3|protein-coding	6.68442	5.89182	3.66175	10.9743	6.33134	16.9276	16.0664	17.1682	18.4037	16.7073	16.2357	1.00047	3.64404	14.5937	0.000133358	0.0114029	320460	Vwc2l
Kcnh7|9330137I11Rik|Kv11.3|erg3|-|2|2 C1.3|protein-coding	5.61879	2.45492	1.86824	1.14456	1.53487	1.96694	11.6238	5.33727	7.80763	4.45529	2.84421	1.41775	2.13372	14.5643	0.000135459	0.011443	170738	Kcnh7
Sap25|-|-|5 G2|5|protein-coding	16.2751	12.5201	11.9567	13.0614	12.6627	10.0135	8.03321	8.45067	7.93156	9.76232	9.30294	-0.54435	3.45838	14.5746	0.000134718	0.011443	751865	Sap25
Kdm5a|AA409370|C76986|Jarid1a|RBP2|Rbbp2|-|6 F1|6 56.95 cM|protein-coding	49.9878	51.3079	52.4601	39.9923	51.0984	50.5443	63.1094	64.2251	64.32	64.5362	60.0839	0.361771	5.80104	14.4694	0.000142455	0.0119198	214899	Kdm5a
Gstm1|Gstb-1|Gstb1|-|3|3 F2.3|protein-coding	154.71	152.205	137.951	193.902	153.743	146.686	122.324	101.942	125.17	122.651	128.76	-0.380728	7.13075	14.4648	0.000142803	0.0119198	14862	Gstm1
Nyap2|9430031J16Rik|Jr6|Kiaa1486|-|1|1 C5|protein-coding	9.49381	10.3925	7.32349	2.96239	6.90692	8.5234	14.4841	15.9228	13.6943	12.3176	10.8436	0.826852	3.37642	14.4423	0.000144522	0.0119333	241134	Nyap2
Mib1|DIP-1|E430019M12Rik|Mib|mKIAA1323|-|18|18 A1|protein-coding	84.8631	64.2372	70.0963	27.3348	61.9064	56.3259	107.231	99.3621	97.6574	90.2196	93.9182	0.685305	6.27961	14.4404	0.000144666	0.0119333	225164	Mib1
Slc6a13|GAT3|Gabt3|Gat2|-|6|6 F1|protein-coding	3.68127	3.43689	5.67944	4.91487	7.09878	2.861	3.52974	9.69604	9.2948	12.7762	14.5173	1.10685	2.85453	14.4145	0.000146666	0.0120275	14412	Slc6a13
Grm8|A230002O04|Gprc1h|mGluR8|-|6|6 A3.1-A3.2|protein-coding	5.03753	7.4466	6.20255	6.39607	5.75576	8.10617	8.94607	10.9414	10.8439	11.7279	7.99934	0.627373	3.05143	14.2794	0.000157584	0.0128477	14823	Grm8
Tmem178b|EG434008|Gm5567|-|6 B1|6|protein-coding	40.3971	23.8946	30.4896	10.301	23.8544	22.5304	53.1287	45.8115	49.6342	39.7045	34.3083	0.821031	5.09275	14.2289	0.000161868	0.0130745	434008	Tmem178b
Rpl13|A52|L13|-|8|8 E1|protein-coding	30.8065	27.7406	26.3795	53.525	27.4358	23.9609	20.9959	18.6804	18.8994	9.17265	22.2204	-0.813786	4.67529	14.2247	0.000162231	0.0130745	270106	Rpl13
Hectd1|A630086P08Rik|AI844876|b2b327Clo|opm|-|12 B3|12 22.11 cM|protein-coding	166.82	128.147	162.686	121.189	151.377	153.66	206.247	180.666	188.87	185.746	190.681	0.370932	7.38434	14.2068	0.000163774	0.0131235	207304	Hectd1
Gan|A330045G18|gigaxonin|-|8|8 E1|protein-coding	5.52191	4.58252	3.43756	1.34654	2.74998	2.02654	8.7635	8.62858	7.18798	5.04496	4.97737	1.09232	2.33311	14.1484	0.000168942	0.0134607	209239	Gan
Dnah5|AU022615|Dnahc5|Mdnah5|b2b1134Clo|b2b1154Clo|b2b1537Clo|b2b1565Clo|b2b601Clo|mKIAA1603|-|15 B1|15 10.9 cM|protein-coding	6.10317	4.50069	7.54768	6.39607	6.45925	6.25844	9.1895	10.4077	8.30336	9.76232	9.24368	0.587933	2.96492	14.1077	0.000172637	0.0136773	110082	Dnah5
Bicd1|B830009D06Rik|bic-D 1|-|6|6 G3|protein-coding	57.4473	52.2899	60.7551	37.4338	52.8251	57.4584	72.4814	70.9857	77.6426	69.319	65.8909	0.426867	5.94185	14.0663	0.000176477	0.0138935	12121	Bicd1
Pfdn2|ESTM27|W48336|-|1 H3|1 79.35 cM|protein-coding	66.9411	65.301	64.5663	79.9172	56.3425	57.518	53.007	49.1029	47.4035	46.715	51.9068	-0.390559	5.86239	14.0471	0.000178291	0.0138935	18637	Pfdn2
Ankrd12|2900001A12Rik|AI447928|ANCO-2|AV347965|GAC-1|mKIAA0874|-|17|17 E1.1|protein-coding	79.2443	72.0111	80.8573	53.3903	69.7727	73.4323	100.659	90.8225	99.5783	89.4989	89.5926	0.397266	6.35514	14.0466	0.000178338	0.0138935	106585	Ankrd12
Egln2|0610011A13Rik|C85656|Hif-p4h-1|Ier4|Phd1|SM-20|-|7 A3|7 15.83 cM|protein-coding	78.8568	78.7212	72.114	94.4598	72.7145	72.8959	64.0222	64.2251	61.9654	56.2808	58.8989	-0.358502	6.14125	13.9885	0.000183931	0.0142501	112406	Egln2
Pikfyve|5230400C17Rik|Pip5k|Pip5k3|Pipk5k3|PipkIII|p235|-|1|1 C2|protein-coding	70.7192	58.5908	62.8475	50.1586	70.0924	62.5844	84.9572	79.7921	81.9182	83.0125	74.1865	0.370758	6.14881	13.9661	0.000186141	0.014342	18711	Pikfyve
Prex2|6230420N16Rik|AI316880|AI553603|C030045D06Rik|D430013K02|Depdc2|P-Rex2|-|1|1 A2|protein-coding	65.4879	62.0277	50.7413	40.5309	47.1333	45.2992	71.9946	75.2555	67.7901	68.3363	68.3203	0.441846	5.91595	13.9315	0.000189593	0.0144493	109294	Prex2
Svep1|1110021D17Rik|4833413O10Rik|AA387071|D430029O09Rik|Polydom|-|4|4 B3|protein-coding	1.74376	0.736477	1.2704	1.00991	1.98254	1.07287	1.52144	2.84654	2.85041	2.35868	4.56259	1.11784	1.10924	13.9349	0.000189249	0.0144493	64817	Svep1
Olig2|AI604895|Bhlhb1|Olg-2|Oligo2|RK17|bHLHe19|-|16 C3.3|16 52.6 cM|protein-coding	39.719	42.3065	37.8131	39.117	31.9125	33.2591	30.0028	28.9992	29.2476	22.0144	29.5087	-0.415961	5.05218	13.909	0.000191877	0.0145443	50913	Olig2
Tox2|AI851523|AV026525|BI987407|Gcx1|RxHMG1|-|2 H2|2|protein-coding	12.6907	11.0472	11.7325	11.9842	12.8545	15.4375	16.8576	22.6834	19.2093	16.1832	15.5246	0.511324	3.9311	13.8946	0.000193355	0.0145775	269389	Tox2
Ndnf|A930038C07Rik|epidermacan|-|6|6 C1|protein-coding	17.147	13.5839	20.7001	14.206	17.2033	14.4242	21.3002	21.1712	24.7861	21.8178	23.1685	0.471873	4.2635	13.8758	0.000195292	0.0146158	68169	Ndnf
Ndufb4|0610006N12Rik|1300010H20Rik|-|16|16 B3|protein-coding	12.8845	10.3107	12.7787	15.4179	9.84875	10.5499	9.25036	7.56113	7.49781	7.40364	8.65114	-0.562951	3.36599	13.8565	0.000197317	0.0146158	68194	Ndufb4
Trove2|1810007I17Rik|A530054J02Rik|AI646302|SS-A/Ro|Ssa|Ssa2|-|1 F|1 62.54 cM|protein-coding	79.1474	72.9112	81.0815	55.2082	76.8075	76.4721	97.6156	98.5615	96.2942	97.9508	88.6446	0.380715	6.38964	13.8398	0.000199074	0.0146158	20822	Trove2
Dnajb5|1110058L06Rik|AI462558|Hsc40|Hsp40-3|-|4|4 A5|protein-coding	108.985	86.0042	104.547	112.638	110.894	96.976	78.5672	85.2184	78.3242	87.2057	72.9421	-0.361908	6.53996	13.8451	0.000198511	0.0146158	56323	Dnajb5
Prkaa2|2310008I11Rik|A830082D05|AMPKalpha2|-|4|4 C6|protein-coding	48.5347	47.5437	47.8269	38.0398	46.4938	52.2132	60.7968	58.1762	63.7004	56.8049	61.9208	0.366558	5.72992	13.8508	0.00019791	0.0146158	108079	Prkaa2
Plch1|BC042549|PLC-eta-1|PLCeta1|Plcl3|-|3|3 E1|protein-coding	15.7907	15.3842	11.8073	16.2931	14.3894	17.2852	18.3181	24.7293	23.7327	19.2626	20.0872	0.481912	4.17486	13.8278	0.000200346	0.0146326	269437	Plch1
Slc6a12|BGT1|GAT-2|GAT2|Gabt2|-|6|6 F1|protein-coding	0.290627	0.572816	0.747295	0.471289	1.47092	1.07287	1.03458	1.60118	1.48717	2.48972	3.31825	1.32145	0.59178	13.7194	0.000212246	0.0154214	14411	Slc6a12
Fam180a|B230314O19|-|6|6 B1|protein-coding	1.25938	0.490985	0.523107	0.875251	0.831388	0.357625	1.03458	1.06745	1.73503	2.22764	1.77763	1.15264	0.331232	13.6576	0.000219353	0.0158207	208164	Fam180a
Psd3|4931420C21Rik|AI661273|BC003498|D430018P08|EFA6D|-|8|8 B3.2-B3.3|protein-coding	813.465	576.171	664.121	532.085	645.157	706.786	952.544	902.354	928.737	920.803	784.943	0.452243	9.58167	13.6495	0.000220304	0.0158207	234353	Psd3
Lgi2|mKIAA1916|-|5|5 C1|protein-coding	45.8222	61.6186	42.0727	52.7171	45.9822	80.7636	77.0458	74.0101	88.1767	81.178	73.1199	0.520329	6.04174	13.6425	0.000221126	0.0158207	246316	Lgi2
Akap10|1500031L16Rik|B130049N18Rik|D-AKAP-2|D-AKAP2|PRKA10|-|11|11 B2|protein-coding	28.6752	25.6949	26.3795	16.8318	24.8777	22.6496	35.2974	35.8486	34.5147	30.4008	30.1012	0.460962	4.82912	13.6008	0.000226084	0.0160933	56697	Akap10
Klhl11|BC011167|-|11|11 D|protein-coding	35.4565	19.5576	32.6568	9.29113	23.5347	28.1332	46.3127	43.4987	43.1279	44.6839	37.3303	0.796763	5.0529	13.5845	0.000228055	0.0161516	217194	Klhl11
Csnk1g2|2810429I12Rik|AI463719|-|10|10 C1|protein-coding	139.113	142.549	131.898	148.927	131.551	126.122	112.891	113.862	103.358	111.972	110.45	-0.306716	6.96466	13.5402	0.000233507	0.0164546	103236	Csnk1g2
Spata2l|2610039E05Rik|AI648233|mKIAA4138|-|8|8 E1|protein-coding	46.5972	49.4258	46.1828	52.1111	40.802	41.5441	36.4537	35.8486	34.9485	37.6079	35.7896	-0.350673	5.38144	13.5261	0.000235265	0.0164956	78779	Spata2l
Slit2|Drad-1|E030015M03Rik|E130320P19Rik|Slil3|mKIAA4141|slit-2|-|5|5 B3|protein-coding	42.819	29.4591	41.9233	33.7308	43.9357	48.2198	53.0679	58.7989	59.3008	60.1464	44.3815	0.460815	5.5561	13.4865	0.000240285	0.0165986	20563	Slit2
Angpt1|1110046O21Rik|Ang-1|Ang1|-|15 B3.1|15 16.69 cM|protein-coding	6.49067	3.92788	6.50147	6.32874	6.65111	8.583	8.39835	12.0089	13.3226	9.17265	9.18443	0.690356	3.07048	13.4988	0.000238719	0.0165986	11600	Angpt1
Ranbp2|A430087B05Rik|AI256741|NUP358|-|10 B4|10 29.34 cM|protein-coding	146.96	130.029	149.16	91.6994	134.557	123.202	179.165	168.035	179.328	169.629	159.039	0.404608	7.21331	13.4871	0.000240205	0.0165986	19386	Ranbp2
Nrep|AI325076|D0H4S114|Harp|P311|PTZ17|SEZ17|-|18|18 B1|protein-coding	43.4003	41.1609	38.9341	63.2874	52.5693	67.5911	83.9835	58.532	70.0208	85.1091	73.0014	0.533829	5.95016	13.4612	0.000243548	0.0167416	27528	Nrep
Scn2a|6430408L10|A230052E19Rik|Nav1.2|Scn2a1|-|2 C1.3|2 38.61 cM|protein-coding	369.29	313.576	356.236	258.401	326.608	366.208	454.972	417.73	455.445	455.488	394.101	0.392998	8.56631	13.3867	0.000253414	0.0171545	110876	Scn2a
0610010K14Rik|1110020A23Rik|AL033328|AU045833|Bap18|-|11|11 B3|protein-coding	16.1782	16.939	17.1878	17.5724	16.1801	16.0931	12.6584	12.2757	12.8888	12.3831	12.6804	-0.407133	3.90158	13.3791	0.000254449	0.0171545	104457	0610010K14Rik
Rif1|5730435J01Rik|6530403D07Rik|AU016181|AW549474|D2Ertd145e|-|2 C1.1|2 29.98 cM|protein-coding	42.3347	37.0693	38.0373	25.4496	36.645	35.5837	50.451	48.1244	48.8907	49.4668	42.3669	0.418783	5.37319	13.3844	0.000253721	0.0171545	51869	Rif1
Rplp2|2700049I22Rik|-|7|7 F5|protein-coding	6.20004	7.61026	7.69714	7.54063	7.22668	6.67567	5.53804	5.0704	4.33757	4.19321	4.56259	-0.597457	2.62777	13.3887	0.000253141	0.0171545	67186	Rplp2
Asphd2|2900006N09Rik|9230106G13Rik|-|5|5 F|protein-coding	91.7412	79.8669	89.4512	92.7766	85.3132	84.2803	70.4123	72.231	66.9226	67.6811	73.0606	-0.316314	6.31374	13.3512	0.000258261	0.0173282	72898	Asphd2
D430041D05Rik|9630056G07Rik|G2|-|2 E2|2 54.59 cM|protein-coding	167.595	167.017	178.08	153.034	170.307	186.501	223.408	221.319	219.109	211.561	190.207	0.322216	7.56974	13.3197	0.00026263	0.0173384	241589	D430041D05Rik
Zfp292|5730450D02Rik|5830493J20Rik|9430062L07Rik|AI449016|Krox-10|Zfp-15|Zfp15|Zn-15|Zn-16|mKIAA0530|-|4 A5|4 16.86 cM|protein-coding	54.7347	58.3454	54.7767	41.6081	54.4879	53.2861	72.8466	65.7373	70.1448	69.7122	62.0393	0.366083	5.90552	13.3282	0.000261447	0.0173384	30046	Zfp292
Parm1|2210012L08Rik|9130213B05Rik|W91666|-|5|5 E2|protein-coding	42.044	26.3495	33.6283	27.8734	35.2381	46.9681	50.0858	49.2808	48.3949	52.3496	46.2777	0.478678	5.38697	13.3379	0.000260098	0.0173384	231440	Parm1
Syt2|IP4BP|R74640|mKIAA4194|-|1 E4|1 58.24 cM|protein-coding	13.0782	20.9487	11.3589	8.41588	12.0871	20.8019	25.7428	21.7049	24.1665	23.1282	21.9241	0.691379	4.22235	13.3145	0.000263358	0.0173384	20980	Syt2
Mga|AV312082|C130042M01Rik|C80739|D030062C11Rik|Mad5|-|2|2 E5|protein-coding	62.7754	70.8655	67.3313	50.2933	63.889	63.1208	88.5478	78.3689	85.5122	77.5744	74.4828	0.360507	6.15609	13.2846	0.00026759	0.0175347	29808	Mga
Ctss|Cats|-|3 F2.1|3 40.74 cM|protein-coding	73.7224	85.5132	66.8829	73.3191	61.0751	53.8226	52.155	51.7715	49.5103	48.0909	57.0027	-0.415685	5.9368	13.2373	0.000274433	0.0178994	13040	Ctss
Adarb2|Adar3|RED2|-|13|13 A1|protein-coding	22.0876	13.4202	28.9203	14.0713	23.9824	24.4377	31.7068	34.9591	31.6023	33.0215	29.3309	0.600979	4.71715	13.1774	0.000283349	0.0183954	94191	Adarb2
Aebp1|ACLP|-|11|11 A1|protein-coding	10.9469	14.484	12.4798	11.5802	17.0754	8.6426	9.1895	25.1741	21.8738	23.2592	33.0639	0.843763	4.10715	13.1613	0.000285788	0.0184682	11568	Aebp1
Rpl32|AU020185|rpL32-3A|-|6 E3|6 53.72 cM|protein-coding	34.5846	34.2053	33.1799	52.7171	31.9765	32.0074	26.7165	25.441	25.4058	21.2281	30.279	-0.497184	4.98822	13.1438	0.000288477	0.0184718	19951	Rpl32
Ubxn7|A630090P18|AI196514|Ubxd7|mKIAA0794|-|16|16 B3|protein-coding	67.1348	60.5548	64.1927	48.9467	60.0518	61.9883	73.2117	75.7892	81.0507	81.5056	73.4754	0.349646	6.09032	13.1483	0.000287787	0.0184718	224111	Ubxn7
Tenm4|Doc4|ELM2|Odz4|R75022|Ten-m4|l(7)-3Rn|l7Rn3|mKIAA1302|-|7 E1|7 52.53 cM|protein-coding	202.373	199.012	175.315	142.599	175.487	201.164	235.762	258.946	248.233	249.234	201.465	0.38628	7.70236	13.1167	0.000292671	0.018487	23966	Tenm4
Faxc|6230409E13Rik|AW742931|-|4|4 A3|protein-coding	110.535	92.5506	106.041	78.5706	100.79	114.5	139.912	133.343	127.711	127.696	121.946	0.37274	6.83433	13.1259	0.000291242	0.018487	76132	Faxc
Rps5|AA617411|-|7|7 A1|protein-coding	144.151	149.832	126.143	180.773	130.592	134.05	114.656	113.328	108.997	104.961	119.457	-0.361419	7.02059	13.1185	0.000292391	0.018487	20103	Rps5
Nupl1|1700017F11Rik|Nup58|mKIAA0410|-|14|14 D1|protein-coding	34.0034	31.0139	34.6745	22.6892	32.1683	34.5704	41.3223	42.5202	40.8971	40.5562	41.6558	0.393566	5.1761	13.0991	0.000295435	0.0185494	71844	Nupl1
Prrc2c|1810043M20Rik|9630039I18Rik|A630006J20|Bat2d|Bat2d1|Bat2l2|E130112L15Rik|Prrc3|mKIAA1096|-|1 H2.1|1|protein-coding	203.73	182.728	205.506	122.67	176.958	174.402	273.494	241.067	249.844	219.357	216.753	0.434905	7.6878	13.0936	0.000296303	0.0185494	226562	Prrc2c
Impad1|1110001C20Rik|AA408880|AI451589|AL022796|B230207P20|Jaws|gPAPP|-|4|4 A1|protein-coding	74.9818	77.1664	80.1848	44.9071	76.2959	82.969	98.2851	103.009	101.623	101.816	92.9701	0.452309	6.41074	13.0404	0.00030485	0.0189996	242291	Impad1
Ppp1r1b|AU040756|DARPP-32|Darpp32|-|11|11 D|protein-coding	45.8222	880.663	110.077	58.1706	59.4762	41.1865	38.6446	39.5847	42.5702	38.3286	56.4102	-2.20807	7.00132	12.9979	0.000311841	0.0193493	19049	Ppp1r1b
Gpr84|EX33|-|15|15 F3|protein-coding	2.42189	1.47295	1.34513	1.61585	1.98254	2.08615	1.03458	0.355818	1.05341	0.58967	1.3036	-1.01609	0.605344	12.968	0.000316861	0.0195695	80910	Gpr84
Ago2|1110029L17Rik|2310051F07Rik|AI225898|AL022874|AW546247|ENSMUSG00000072493|Eif2c2|Gerp95|Gm10365|mKIAA4215|-|15|15 D3|protein-coding	63.2598	54.9903	47.9016	24.3051	46.4938	43.5706	80.8189	75.9671	76.899	66.5672	56.5287	0.611496	5.8593	12.9593	0.000318335	0.0195695	239528	Ago2
Fam208b|AI645998|Pap20|mKIAA2006|-|13|13 A1|protein-coding	34.5846	38.6241	34.3008	22.6892	34.2148	31.769	43.3915	42.6092	45.3586	43.308	42.4261	0.411207	5.23707	12.952	0.000319576	0.0195695	105203	Fam208b
Fam83h|AA409316|-|15|15 D3|protein-coding	2.51877	1.88211	3.06391	1.95248	2.49416	1.90733	3.04288	4.71459	4.15168	4.25873	3.49601	0.767171	1.66929	12.8986	0.000328835	0.020022	105732	Fam83h
Sphk1|1110006G24Rik|Sk1|Spk1|-|11|11 E2|protein-coding	0.67813	0.736477	0.822025	1.14456	0.959294	0.655646	0.608576	2.04595	1.98289	2.09661	2.48868	1.12577	0.531552	12.893	0.000329821	0.020022	20698	Sphk1
Pten|2310035O07Rik|A130070J02Rik|AI463227|B430203M17Rik|MMAC1|TEP1|-|19 C1|19 28.14 cM|protein-coding	167.886	185.101	170.981	127.248	170.882	179.349	231.016	201.482	214.276	219.226	204.428	0.359406	7.55851	12.8698	0.000333926	0.0201838	19211	Pten
Shfm1|DSS1|Shfdg1|Shfg|-|6|6 A1|protein-coding	37.0065	40.5881	36.9164	50.6973	35.4939	35.4645	31.0374	30.0666	27.8224	26.7317	32.8862	-0.405772	5.13327	12.8433	0.000338691	0.0203603	20422	Shfm1
Prr7|XM_484263|-|13|13 B1|protein-coding	30.8065	28.9681	30.938	35.5487	30.0579	33.4975	22.6999	27.9317	24.4143	22.8661	24.9461	-0.368616	4.83518	12.8375	0.00033975	0.0203603	432763	Prr7
Traip|Trip|-|9 F1|9 59.07 cM|protein-coding	23.4439	34.8599	19.2055	21.006	19.3138	15.1991	14.0581	16.9013	14.5619	13.9555	12.7397	-0.616971	4.22559	12.8279	0.000341484	0.0203771	22036	Traip
Irs1|G972R|IRS-1|-|1 C5|1 42.0 cM|protein-coding	28.7721	18.3301	28.3972	23.9684	35.302	28.8484	36.6363	34.8701	38.7283	40.9493	36.9155	0.462926	5.00698	12.8146	0.000343929	0.0204055	16367	Irs1
Klhl24|1110046J11Rik|4930429H24Rik|6530402O20Rik|C85082|-|16|16 A3|protein-coding	76.0474	72.7476	74.7295	52.5824	73.2261	73.2535	89.2173	91.712	99.1446	86.4195	87.7557	0.367866	6.31937	12.8095	0.000344869	0.0204055	75785	Klhl24
Samd12|A830094I09Rik|-|15|15 C-D1|protein-coding	4.16565	4.00971	3.2881	1.34654	3.64532	3.33783	7.05948	6.22681	5.57688	4.97944	5.21439	0.823748	2.1962	12.7609	0.000353936	0.020854	320679	Samd12
Ube2g2|1110003O05Rik|D10Xrf369|UBC7|Ubc7p|-|10 C1|10 39.72 cM|protein-coding	51.1503	38.6241	48.0511	55.2755	47.1333	47.2661	35.6626	33.6248	39.7818	38.132	38.5153	-0.366236	5.43134	12.7185	0.00036205	0.0212428	22213	Ube2g2
Ptpn14|C130080N23Rik|OTTMUSG00000022087|PTP36|-|1 H6|1 95.03 cM|protein-coding	21.1189	11.3745	19.6539	17.505	25.1335	20.1462	21.787	34.8701	30.425	26.8628	29.5679	0.580074	4.56361	12.7061	0.00036447	0.0212957	19250	Ptpn14
Dennd5b|9330160C06Rik|AI852444|D030011O10Rik|ENSMUSG00000072657|Gm17524|-|6|6 G3|protein-coding	108.404	90.423	86.6115	63.624	81.0284	91.1348	128.166	114.662	117.61	114.396	102.392	0.411432	6.64374	12.698	0.000366052	0.0212993	320560	Dennd5b
Nop10|1110036B12Rik|NOP10P|Nola3|-|2|2 E3|protein-coding	21.797	22.0943	22.7925	30.3645	24.9416	22.7688	19.4744	16.9013	17.4123	15.2659	19.7317	-0.442351	4.41771	12.6635	0.000372864	0.0216061	66181	Nop10
Dusp6|1300019I03Rik|MKP-3|MKP3|PYST1|-|10|10 D1|protein-coding	87.8662	52.5354	70.0963	72.0399	78.2144	57.1604	53.1896	51.5046	55.459	51.4324	44.2038	-0.444414	5.9387	12.6473	0.000376103	0.0216625	67603	Dusp6
Slc13a3|NaDC-3|NaDC3|SDCT2|-|2|2 H3|protein-coding	14.9189	13.3384	13.825	13.7347	13.3662	10.0731	13.3278	18.5025	18.9614	20.2454	25.7164	0.554592	4.0137	12.6432	0.000376927	0.0216625	114644	Slc13a3
Vgf|Gm1052|-|5 G2|5 76.13 cM|protein-coding	235.989	239.028	201.471	220.765	183.353	204.86	163.524	189.295	176.973	158.752	152.462	-0.349069	7.59545	12.6117	0.000383339	0.0219411	381677	Vgf
Selenow|Sepw1|selW|-|7|7 A2|protein-coding	592.782	538.365	565.777	753.053	524.158	519.629	458.075	395.669	454.144	431.377	457.918	-0.405964	9.01537	12.572	0.000391566	0.0222397	20364	Selenow
Cdc34|AI327276|UBE2R1|-|10 C1|10 39.72 cM|protein-coding	27.6096	24.4674	26.529	33.8655	26.0928	24.4973	18.5616	20.6374	21.9357	19.5246	21.5686	-0.410584	4.59918	12.5712	0.000391728	0.0222397	216150	Cdc34
Xrn1|Dhm2|exo|mXrn1|-|9|9 E3.3|protein-coding	53.0879	51.7171	57.6165	35.8853	47.9647	48.339	67.0651	62.1792	64.5059	68.3363	60.1432	0.393789	5.81304	12.5617	0.000393738	0.0222596	24127	Xrn1
Rc3h1|5730557L09Rik|Gm551|N28103|mKIAA2025|-|1|1 H2.1|protein-coding	71.5911	58.5908	70.2457	48.3408	65.6157	63.0612	85.3833	78.7247	84.7686	84.3229	73.2384	0.370851	6.15802	12.5545	0.000395254	0.0222596	381305	Rc3h1
2010107E04Rik|9430003J03Rik|AU043134|AV124504|Mp68|-|12|12 F1|protein-coding	63.8411	70.5381	63.7443	101.731	62.1623	59.8426	56.3542	45.6336	52.6705	45.5357	53.9807	-0.467264	5.94467	12.5273	0.00040104	0.0224951	70257	2010107E04Rik
Cbl|4732447J05Rik|Cbl-2|c-Cbl|cbl|-|9 A5.1-A5.2|9 24.72 cM|protein-coding	29.8377	18.8211	21.5968	5.25151	13.4301	13.4705	36.0277	36.2934	41.5788	26.9283	24.9461	0.961335	4.61359	12.4869	0.000409809	0.0228196	12402	Cbl
Cox17|AI037035|-|16|16 B3-B4|protein-coding	35.4565	39.0333	30.6391	50.6973	29.7381	30.3385	28.4814	22.7723	26.5831	24.4386	26.6645	-0.478461	4.97589	12.4857	0.000410079	0.0228196	12856	Cox17
Drd2|D2R|Drd-2|-|9 A5.3|9 26.72 cM|protein-coding	1.64689	98.1969	10.6863	3.02972	1.47092	2.38417	1.5823	3.46922	2.54058	2.48972	2.54794	-2.9503	3.54311	12.475	0.000412444	0.0228605	13489	Drd2
Arhgap5|p190-B|p190B|-|12 C1|12 22.16 cM|protein-coding	125.26	117.345	116.503	58.2379	108.017	103.592	146.971	141.527	151.072	153.118	144.581	0.493033	6.95817	12.4511	0.000417745	0.0230343	11855	Arhgap5
Cd163|CD163v2|CD163v3|-|6|6 F2|protein-coding	1.35626	1.63662	1.34513	1.07723	1.53487	0.476833	1.64316	2.22386	2.91237	2.62076	2.42943	0.95214	0.921979	12.4461	0.000418864	0.0230343	93671	Cd163
Asxl3|C230079D11Rik|D430002O22Rik|D930044O18Rik|Gm329|Gm945|-|18|18 A2|protein-coding	14.4345	14.5659	14.1986	11.6476	11.1918	13.7686	22.3956	16.7234	17.7221	16.5763	17.7171	0.459715	3.97229	12.4219	0.000424333	0.0232246	211961	Asxl3
Arl3|-|-|19|19 C3|protein-coding	65.0036	75.2025	69.2743	83.0142	64.0808	67.1143	58.119	56.2192	55.521	50.7117	58.3656	-0.340089	6.00003	12.4161	0.000425637	0.0232246	56350	Arl3
Rpl37a|-|-|1|1 C3|protein-coding	12.4001	12.8474	12.4051	21.814	12.7906	12.3977	10.2241	8.9844	9.23284	7.79675	10.5473	-0.592418	3.5952	12.4083	0.000427419	0.0232314	19981	Rpl37a
Rin1|-|-|19|19 A|protein-coding	109.954	110.062	107.237	97.7588	95.2899	100.195	78.0195	89.3992	79.5635	90.023	77.2085	-0.320068	6.55707	12.3876	0.000432184	0.0233997	225870	Rin1
Mfsd2a|1700018O18Rik|Mfsd2|NLS1|-|4|4 D2.2|protein-coding	17.8251	22.1761	16.9636	19.2555	17.715	19.6694	14.7275	12.2757	14.1281	14.8073	14.7543	-0.41755	4.07767	12.3538	0.000440088	0.0236569	76574	Mfsd2a
Hras|H-ras|Ha-ras|Harvey-ras|Hras-1|Hras1|Kras2|c-H-ras|c-Ha-ras|c-rasHa|ras|-|7 F5|7 86.48 cM|protein-coding	82.0537	115.054	85.4158	109.878	77.511	80.406	71.9946	65.6484	73.8627	64.6672	69.6239	-0.406628	6.35017	12.3529	0.000440308	0.0236569	15461	Hras
Eif3f|0610037M02Rik|AA409853|Eif3s5|-|7|7 E3|protein-coding	113.732	118	109.404	138.02	110.83	115.274	95.2422	91.712	91.7707	94.9369	97.6512	-0.318386	6.74269	12.3025	0.000452346	0.0242109	66085	Eif3f
Csrnp3|A330102K23Rik|CSRNP-3|Csnrp3|Mbu1|taip-2|-|2|2 C1.3|protein-coding	111.891	103.761	102.454	82.9469	96.9527	113.129	148.736	126.582	130.251	130.448	115.428	0.355689	6.84462	12.2923	0.00045483	0.0242513	77771	Csrnp3
Gp1bb|-|-|16 A3|16 11.53 cM|protein-coding	132.526	183.301	143.78	193.565	139.737	145.971	119.159	139.125	116.991	96.0508	117.501	-0.41076	7.11887	12.2481	0.000465741	0.0246439	14724	Gp1bb
Sh2d3c|Chat|Nsp3|Shep1|-|2|2 B|protein-coding	14.047	13.0929	12.9282	16.5624	15.6045	18.7753	19.0484	21.8828	19.5191	25.6179	19.1392	0.465925	4.17065	12.2485	0.000465621	0.0246439	27387	Sh2d3c
Brwd3|Brodl|D030064D06Rik|Gm596|-|X|X D|protein-coding	6.68442	7.20111	8.14552	3.16437	8.76155	4.58952	12.7801	8.89545	13.5704	8.51746	11.1398	0.778299	3.11643	12.2412	0.000467467	0.0246439	382236	Brwd3
Junb|-|-|8 C3|8 41.41 cM|protein-coding	60.8379	49.0166	59.9331	64.7013	60.2437	39.1003	35.906	41.4528	34.8865	52.5462	29.1532	-0.520795	5.5869	12.2319	0.000469788	0.0246736	16477	Junb
Dmxl1|C630007L23Rik|D030030C22|-|18|18 D1|protein-coding	82.6349	71.9293	79.0638	52.3804	70.8599	76.5913	94.451	96.9604	99.6403	93.6266	85.8003	0.38195	6.36306	12.2248	0.000471574	0.024675	240283	Dmxl1
Gjb2|AI325222|Cnx26|Cx26|Gjb-2|-|14 C3|14 30.1 cM|protein-coding	4.16565	6.87379	3.96066	4.17428	10.1685	5.30477	4.26003	10.1408	11.7115	14.8728	19.1984	1.05619	3.14305	12.2127	0.000474661	0.0247441	14619	Gjb2
Setx|A130090N03|A930037J23Rik|AOA2|AW060766|Als4|SCAR1|Sen1|mKIAA0625|-|2|2 B|protein-coding	81.2787	70.7836	82.2772	64.432	72.075	81.8961	104.736	97.583	98.2151	92.3162	84.6745	0.3401	6.40458	12.2038	0.000476932	0.0247704	269254	Setx
Mgat5|4930471A21Rik|5330407H02Rik|AI480971|GlcNAc-TV|-|1|1 E3|protein-coding	36.7159	34.9417	31.3864	17.5724	30.8253	33.6167	46.5561	43.2319	39.9677	42.8494	43.7297	0.490268	5.195	12.1545	0.000489702	0.0251954	107895	Mgat5
Cd200|Mox2|OX2|-|16 B5|16 29.53 cM|protein-coding	58.9004	67.0194	64.2674	73.5884	66.8308	74.386	82.2795	81.3933	91.7707	83.7332	80.586	0.313284	6.23175	12.1227	0.000498118	0.0251954	17470	Cd200
Mpped2|239Fb|2700082O15Rik|AV354767|AW060960|-|2 E3|2 55.8 cM|protein-coding	37.394	46.0707	40.8023	36.8952	34.9183	39.2195	31.7068	31.4009	31.0446	27.518	32.3529	-0.34729	5.15004	12.1176	0.000499488	0.0251954	77015	Mpped2
Cntnap4|Caspr4|E130114F09Rik|-|8|8 E1|protein-coding	20.3439	14.1567	19.6539	25.7863	20.337	26.8219	25.9862	33.7137	29.9912	30.5973	28.9161	0.489187	4.66045	12.1187	0.000499188	0.0251954	170571	Cntnap4
Tmem56|4930577M16Rik|AU018104|AW109744|C730036B01Rik|-|3|3 G1|protein-coding	66.7473	64.7282	60.6804	47.8695	59.2844	64.7897	79.1149	79.1695	78.4481	77.6399	70.572	0.344054	6.09242	12.1265	0.000497106	0.0251954	99887	Tmem56
Cp|D3Ertd555e|-|3|3 A2|protein-coding	10.8501	16.2843	11.2842	8.48321	17.5871	11.146	13.4495	18.5025	21.0682	20.9005	24.9461	0.649312	4.00366	12.1482	0.000491352	0.0251954	12870	Cp
Bmp3|9530029I04Rik|-|5 E3|5 48.24 cM|protein-coding	7.75005	18.0028	6.80039	8.01192	5.62786	12.9937	15.6404	20.7264	20.5725	13.759	16.5912	0.822761	3.75098	12.1189	0.000499137	0.0251954	110075	Bmp3
Bmpr2|2610024H22Rik|AL117858|AW546137|BB189135|BMP-2|BMPR-2|BMPR-II|BMPRII|BRK-3|Gm20272|-|1|1 C2|protein-coding	281.133	243.774	275.229	189.862	252.87	254.689	354.252	301.734	340.995	312.198	307.293	0.373623	8.14591	12.1432	0.000492675	0.0251954	12168	Bmpr2
Pdk1|B830012B01|D530020C15Rik|-|2|2 C3|protein-coding	41.5597	32.8141	38.8593	35.3467	37.5404	38.8023	47.2864	50.5261	46.536	46.715	43.3742	0.322219	5.38887	12.0409	0.000520447	0.0260845	228026	Pdk1
Cep170|4933426L22Rik|A330004A13Rik|AI195353|-|1|1 H4|protein-coding	96.7788	91.405	102.006	75.2716	91.3248	99.3005	118.672	118.043	122.258	118.327	106.125	0.332403	6.69682	12.0396	0.000520835	0.0260845	545389	Cep170
Greb1l|mKIAA4095|-|18|18 A1|protein-coding	13.7563	11.9473	15.8427	11.5129	12.6627	14.4242	17.3444	22.6834	17.7221	18.7384	15.7617	0.461349	3.98218	11.9894	0.000535049	0.0267011	381157	Greb1l
Ppp1r12c|2410197A17Rik|AI839747|B430101M08|Mbs85|-|7|7 A1|protein-coding	88.5443	101.552	88.405	95.4024	84.1621	86.426	72.3597	81.0375	70.3926	68.9259	72.1718	-0.315041	6.37116	11.9745	0.000539324	0.026819	232807	Ppp1r12c
Rspo2|2610028F08Rik|AA673245|D430027K22|ftls|-|15 B3.1-B3.2|15 16.73 cM|protein-coding	12.497	7.93759	14.8712	22.2179	16.7557	27.0603	23.0042	32.2015	33.0275	29.549	25.0053	0.75208	4.48565	11.9661	0.00054178	0.0268458	239405	Rspo2
Cox7a2|COX7AL|Cox7a3|CoxVIIa-L|-|9 E1|9 43.82 cM|protein-coding	83.8943	87.9681	84.4444	114.725	84.1621	86.8433	73.5769	72.0531	70.8884	64.8638	73.0014	-0.350493	6.35092	11.9358	0.000550661	0.0270515	12866	Cox7a2
Zkscan2|9430065N20Rik|AW493225|Zfp694|-|7|7 F3|protein-coding	25.5752	31.7503	23.764	12.1189	23.8544	23.3052	31.0982	37.9836	33.3993	39.3114	32.1159	0.573432	4.84284	11.9123	0.000557657	0.0270515	210162	Zkscan2
Pln|Plb|-|10|10 B3|protein-coding	1.64689	1.63662	1.41986	1.00991	2.68602	1.25169	1.27801	2.49072	3.28416	5.37255	5.98469	1.19414	1.45147	11.8935	0.000563291	0.0270515	18821	Pln
Stx4a|Stx4|Syn-4|Syn4|-|7|7 F3|protein-coding	35.5534	47.2164	34.3756	45.9844	36.9008	32.6631	27.0816	29.1771	31.3545	30.2042	29.6272	-0.394571	5.11572	11.9209	0.000555073	0.0270515	20909	Stx4a
Dnm3|9630020E24Rik|AW061159|B230343F03Rik|C530045C17|mKIAA0820|-|1|1 H2.1|protein-coding	117.801	168.49	123.08	102.202	126.179	144.361	172.714	184.492	162.349	173.167	158.624	0.385154	7.2157	11.897	0.000562246	0.0270515	103967	Dnm3
9230114K14Rik|-|-|5|5 C1|ncRNA	1.16251	1.55479	0.971484	0.67327	1.15115	1.3709	1.76487	2.40177	2.35468	2.09661	1.77763	0.848759	0.77645	11.9204	0.000555214	0.0270515	414108	9230114K14Rik
Arpc5l|2010015J01Rik|AI852867|ARC16-2|AW555592|AW742746|-|2|2 B|protein-coding	55.7035	58.018	53.3569	67.529	52.953	55.4915	45.2172	46.968	44.739	44.3563	46.0999	-0.330809	5.69987	11.9052	0.00055978	0.0270515	74192	Arpc5l
Mkln1|A130067F06Rik|AU015903|BB154892|-|6|6 A3.3|protein-coding	49.6003	37.0693	38.2615	29.4219	40.802	41.7825	54.4676	55.2407	53.0423	48.6151	47.8183	0.393867	5.49929	11.9151	0.000556803	0.0270515	27418	Mkln1
Klf7|9830124P08Rik|-|1|1 C2|protein-coding	7.07192	5.72816	6.27728	3.09704	6.58715	7.1525	9.06779	9.25126	10.2862	9.30369	8.8289	0.64474	2.9391	11.9236	0.000554278	0.0270515	93691	Klf7
Brms1|AV003220|AW554636|-|19|19 A|protein-coding	14.3376	24.3037	15.8427	20.8714	17.715	16.1527	12.9627	11.2972	12.3311	12.6452	14.7543	-0.505847	3.98896	11.8336	0.000581707	0.0278405	107392	Brms1
Col1a1|Col1a-1|Cola-1|Cola1|Mov-13|Mov13|-|11 59.01 cM|11 D|protein-coding	9.78444	9.98336	12.1062	9.2238	18.0987	8.94062	9.85894	18.6804	18.7135	22.8661	24.8868	0.74029	3.90835	11.8183	0.00058652	0.0279754	12842	Col1a1
Gpr101|GPCR6|Gm365|-|X|X A6|protein-coding	4.45628	10.8017	6.12782	6.66538	5.49995	10.6691	10.5892	21.0822	13.5704	13.4314	7.94009	0.845272	3.35014	11.8111	0.000588796	0.0279887	245424	Gpr101
Bace2|1110059C24Rik|AEPLC|AI850424|ALP56|ARP1|ASP1|ASP21|BAE2|CDA13|CEAP1|DRAP|-|16|16 C4|protein-coding	2.03439	4.17337	3.36283	2.89506	3.64532	3.03981	3.77317	8.71754	6.32047	5.04496	4.50333	0.811995	2.15246	11.7937	0.000594319	0.0280611	56175	Bace2
Zc3h12b|A130028J20Rik|CXorf32|Gm373|-|X|X C3|protein-coding	16.2751	8.42857	13.6008	6.86736	11.3197	13.4705	16.9184	18.6804	17.7841	17.2315	17.5393	0.599159	3.85915	11.7941	0.000594184	0.0280611	547176	Zc3h12b
Ptprk|AI853699|PTPk|RPTPkappa|-|10 A4|10 15.06 cM|protein-coding	64.9067	58.2635	82.2025	66.3171	81.6039	79.2735	85.079	96.6045	97.1617	97.6887	87.7557	0.363469	6.35232	11.7655	0.000603394	0.0283939	19272	Ptprk
Rab27b|2310021G14Rik|B130064M09Rik|-|18 E2|18 43.89 cM|protein-coding	46.3066	40.2607	41.4749	36.4239	41.1217	42.6766	51.3638	55.7744	53.8479	48.6151	47.996	0.316534	5.52738	11.7493	0.000608665	0.0285462	80718	Rab27b
Smdt1|1500032L24Rik|Emre|-|15|15 E1|protein-coding	81.7631	87.6408	69.4985	96.6143	65.4239	70.8097	60.1273	59.8663	62.9568	53.529	65.8316	-0.377989	6.13908	11.7261	0.000616287	0.0287468	69029	Smdt1
A230009B12Rik|-|-|17|17 A1|ncRNA	1.93751	1.80028	1.34513	1.14456	1.79068	1.31129	0.547719	0.266863	0.991446	0.720708	1.18509	-0.999205	0.391087	11.7226	0.000617472	0.0287468	319750	A230009B12Rik
Ankhd1|1110004O12Rik|4933432B13Rik|9130019P20Rik|A530027J04Rik|A630021B20Rik|AA571404|Mask|mFLJ00246|mKIAA1085|-|18|18 B2|protein-coding	77.6943	78.3939	70.3205	45.7151	73.0982	67.9487	96.0333	91.89	90.0357	88.6471	88.526	0.403604	6.30514	11.7177	0.000619093	0.0287468	108857	Ankhd1
Ndufa3|1010001M12Rik|1700022J01Rik|-|7|7 A1|protein-coding	49.116	45.9071	48.2753	65.4419	43.8717	51.1404	40.6529	41.6307	38.1087	36.7561	38.9301	-0.369705	5.50983	11.709	0.000621994	0.0287862	66091	Ndufa3
Intu|9230116I04Rik|9430087H23Rik|Pdzd6|Pdzk6|mKIAA1284|-|3|3 B|protein-coding	13.8532	15.466	12.1062	10.907	12.9185	14.4838	15.4578	22.4165	17.5982	17.4936	18.3689	0.456264	3.97079	11.669	0.000635503	0.029313	380614	Intu
Rps26|-|-|10|10 D3|protein-coding	48.9222	49.1803	46.2576	70.0874	42.3368	44.0475	38.0969	34.5143	35.1963	40.1631	39.3449	-0.419615	5.4758	11.6453	0.000643634	0.029313	27370	Rps26
1500011K16Rik|-|-|2|2 F1|ncRNA	22.9595	20.8669	20.999	29.4892	20.0173	22.3516	18.3181	18.5025	16.7926	14.9383	15.8802	-0.433964	4.33757	11.646	0.000643407	0.029313	67885	1500011K16Rik
Slc35d3|6230421J19Rik|Frcl1|-|10|10 A3|protein-coding	0.968757	30.7684	2.69026	1.00991	1.21511	1.31129	1.46058	0.622681	0.991446	0.917265	1.06658	-2.62797	1.95001	11.6448	0.000643829	0.029313	76157	Slc35d3
Glra3|-|-|8 B2|8 29.69 cM|protein-coding	0.67813	2.37309	1.41986	0.201981	0.959294	1.3709	2.31259	3.914	4.02775	1.90005	1.95539	1.26531	1.0395	11.6556	0.0006401	0.029313	110304	Glra3
Zc3hav1l|B130055L09Rik|E430016P22Rik|-|6|6 B1|protein-coding	11.8188	9.65603	12.9282	8.75251	10.2964	8.82142	14.0581	14.8554	13.1986	15.5935	13.51	0.460354	3.61703	11.5786	0.000667154	0.0297	209032	Zc3hav1l
Wnk3|Prkwnk3|Wnk3-ps|-|X|X F3|protein-coding	46.2097	40.8336	46.7059	31.9803	41.5055	48.3986	58.4842	55.4186	61.7175	51.5634	50.0107	0.380333	5.60261	11.5786	0.000667139	0.0297	279561	Wnk3
Six3|E130112M24Rik|Six3a|Six3alpha|Six3b|Six3beta|-|17 E4|17 55.42 cM|protein-coding	1.16251	48.9348	6.05309	1.54852	2.23835	0.536437	0.304288	0.978499	1.54913	0.720708	2.7257	-2.99254	2.57723	11.6072	0.000656961	0.0297	20473	Six3
Tjap1|0610041D19Rik|AI415281|AW121008|Pilt|Tjp4|-|17|17 C|protein-coding	27.4158	29.9501	23.6893	23.9011	27.6916	24.4377	18.3181	19.3031	19.9528	19.8522	22.8722	-0.381199	4.55528	11.5833	0.000665481	0.0297	74094	Tjap1
Pds5a|9030416H16Rik|E230024D05Rik|mKIAA0648|-|5|5 C3.1|protein-coding	42.2378	39.6879	43.1937	25.2476	42.9124	39.5176	56.4759	48.5691	51.0594	50.9737	50.9588	0.412967	5.48467	11.5951	0.000661257	0.0297	71521	Pds5a
Rasl10b|B230331P10Rik|Gm729|VTS58635|-|11|11 C|protein-coding	275.224	436.076	290.773	260.892	238.736	252.066	216.349	225.855	209.195	201.995	213.197	-0.454227	8.00267	11.5956	0.00066109	0.0297	276952	Rasl10b
Tsen15|5730449L18Rik|AL023077|Sen15|-|1|1 G2|protein-coding	8.04068	8.18308	8.74335	12.1862	7.67435	7.74854	5.23376	6.49368	4.6474	5.56911	6.87351	-0.608075	2.91011	11.5821	0.000665913	0.0297	66637	Tsen15
Fam135a|4921533L14Rik|AI256732|AI835491|-|1|1 A5|protein-coding	28.0939	39.8516	32.8063	29.8259	36.8369	36.895	41.444	44.7441	42.942	46.1909	43.0779	0.356934	5.27025	11.5639	0.000672449	0.029841	68187	Fam135a
Olfml2a|4932431K08Rik|mFLJ00237|-|2|2 B|protein-coding	0.484378	1.47295	0.672566	0.605943	1.15115	0.298021	0.973722	1.69013	1.797	1.44142	3.14048	1.21469	0.49128	11.5505	0.000677297	0.0298671	241327	Olfml2a
Sfmbt2|D2Wsu23e|D330030P06Rik|-|2 A1|2 7.81 cM|protein-coding	9.59069	6.95562	10.1632	8.2139	9.40108	11.8612	11.6238	13.9658	13.9422	13.2348	12.8582	0.480826	3.49011	11.5528	0.000676472	0.0298671	353282	Sfmbt2
Rnf166|1110031E24Rik|AW555115|Zfp313l|-|8|8 E1|protein-coding	25.672	44.025	28.2478	32.317	27.244	28.7888	21.6045	22.3276	23.4849	22.9316	23.7018	-0.44392	4.77705	11.5182	0.00068919	0.030014	68718	Rnf166
Cox6c|-|-|15|15 B3.1|protein-coding	75.3693	85.5132	74.5801	111.898	70.0285	70.5117	66.0914	46.879	64.5679	56.2808	65.7131	-0.439446	6.1644	11.5188	0.000688965	0.030014	12864	Cox6c
Cemip|12H19.01.T7|6330404C01Rik|9930013L23Rik|AY007814|Kiaa1199|-|7 D3|7 48.35 cM|protein-coding	17.5345	11.7836	24.8102	20.5347	27.5637	24.3781	26.0471	31.1341	30.9207	32.8905	35.0193	0.560376	4.69451	11.5271	0.000685882	0.030014	80982	Cemip
Atf7ip|2610204M12Rik|AM|Mcaf1|-|6|6 G1|protein-coding	75.8536	64.9736	70.4699	52.4478	74.3133	68.6044	86.4178	86.7306	87.0613	81.8332	84.9708	0.334124	6.24665	11.5216	0.000687915	0.030014	54343	Atf7ip
Slc26a2|Dtd|ST-OB|-|18|18 E1|protein-coding	5.03753	4.2552	6.20255	2.76041	4.47671	3.75506	7.30292	6.58263	7.12602	6.81397	6.69574	0.653225	2.50947	11.5019	0.000695261	0.030125	13521	Slc26a2
Mecp2|1500041B07Rik|D630021H01Rik|Mbd5|WBP10|-|X A7.3|X 37.63 cM|protein-coding	186.97	177.245	166.198	127.921	151.952	161.587	213.428	209.132	206.407	203.305	189.851	0.336384	7.50304	11.4998	0.000696035	0.030125	17257	Mecp2
Tenm2|Odz2|Odz3|Ten-2|Ten-m2|-|11 A4-A5|11 21.96 cM|protein-coding	218.261	100.079	196.464	175.05	181.051	214.337	264.244	266.063	264.406	258.014	224.811	0.498251	7.74792	11.4896	0.00069988	0.0301675	23964	Tenm2
Ppargc1a|A830037N07Rik|ENSMUSG00000079510|Gm11133|PGC-1|PPARGC-1-alpha|Pgc-1alpha|Pgc1|Pgco1|Ppargc1|-|5|5 C1|protein-coding	66.7473	59.5728	66.7335	62.7488	72.9063	80.8232	88.4261	75.8781	92.3284	94.8059	81.1192	0.341486	6.26185	11.4857	0.000701319	0.0301675	19017	Ppargc1a
Sstr1|SRIF-2|SS-1-R|SS1-R|SS1R|Smstr-1|Smstr1|sst1|-|12 C1|12 25.61 cM|protein-coding	10.1719	16.3662	17.1878	24.507	23.4068	26.047	26.7774	38.7841	33.5233	28.4352	25.5386	0.635097	4.63263	11.4718	0.00070659	0.0302089	20605	Sstr1
Adgrl3|5430402I23Rik|CIRL-3|D130075K09Rik|Gm1379|LEC3|Lphn3|mKIAA0768|-|5|5 D-E1|protein-coding	92.6131	76.6754	80.6331	51.3032	73.2901	82.7306	111.43	101.141	99.5164	106.796	88.5853	0.414294	6.45676	11.4774	0.000704462	0.0302089	319387	Adgrl3
Shprh|2610103K11Rik|AA450458|AU024614|BC006883|D230017O13Rik|E130018M05|-|10|10 A1|protein-coding	52.7004	44.5978	49.172	32.317	47.3891	49.9483	60.1882	63.7803	58.8671	62.243	56.2324	0.38942	5.71785	11.4559	0.00071267	0.0302841	268281	Shprh
Atp5g3|6030447M23|-|2|2 C3|protein-coding	189.004	181.992	202.592	264.393	192.306	190.912	168.271	156.471	163.217	125.141	167.986	-0.381801	7.50908	11.4596	0.000711257	0.0302841	228033	Atp5g3
Dgke|C87606|DAGK6|DGK|-|11|11 C|protein-coding	95.3256	78.4757	91.0206	73.5211	83.0109	94.3534	111.126	106.034	109.059	110.137	99.7844	0.319476	6.58152	11.4435	0.000717458	0.0303955	56077	Dgke
Filip1l|4631422O05Rik|Doc1|-|16|16 C1.1|protein-coding	5.61879	6.13731	5.00688	4.9822	6.58715	6.37765	7.30292	9.34022	7.12602	9.23817	9.53996	0.550839	2.84345	11.4093	0.000730785	0.0308669	78749	Filip1l
Kcna2|Akr6a4|ENSMUSG00000074335|Gm10672|Kca1-2|Kv1.2|Mk-2|-|3 F2.3|3 46.61 cM|protein-coding	246.355	217.015	206.627	170.405	177.597	221.668	301.184	288.479	281.756	250.741	222.856	0.380997	7.87711	11.3924	0.000737452	0.0310549	16490	Kcna2
Lrp1b|9630004P12Rik|LRP-DIT|-|2|2 B|protein-coding	39.0409	33.8779	48.2753	24.6417	35.9416	36.5374	55.3804	46.879	49.3244	48.8116	45.8629	0.438089	5.40557	11.3812	0.000741896	0.0311485	94217	Lrp1b
AW551984|3222402N16|-|9|9 A5.1|protein-coding	3.10002	8.34674	4.11012	5.7228	4.3488	4.88754	6.99863	16.2787	8.98498	8.58298	6.1032	0.874802	2.83602	11.343	0.000757327	0.0315529	244810	AW551984
Rps15|rig|-|10|10 C1|protein-coding	92.71	115.791	110.525	139.636	102.389	114.082	83.3141	97.583	87.2472	87.9264	84.9708	-0.352576	6.66677	11.3352	0.000760527	0.0315529	20054	Rps15
Rnasel|E230029I04Rik|-|1|1 G3|protein-coding	9.97819	9.98336	10.2379	9.08915	11.3836	13.6494	15.5187	16.0118	13.7563	15.528	13.0952	0.455947	3.6701	11.3506	0.00075422	0.0315529	24014	Rnasel
Cdc73|8430414L16Rik|C130030P16Rik|C81219|Hrpt2|-|1 F|1 62.52 cM|protein-coding	38.0721	34.7781	39.1583	25.113	34.5985	33.4379	47.0429	42.965	47.0317	44.6839	40.056	0.377553	5.28377	11.3367	0.0007599	0.0315529	214498	Cdc73
Etv1|ER81|Etsrp81|-|12 A3|12 17.99 cM|protein-coding	56.6723	34.9417	54.1042	49.62	58.1332	75.0416	78.5672	72.7647	74.6063	90.5472	66.0686	0.481534	6.01861	11.3118	0.000770143	0.0318317	14009	Etv1
Uprt|Gm774|-|X|X D|protein-coding	2.80939	2.70042	2.24189	1.14456	2.11045	2.14575	2.92117	4.18086	3.65596	3.60354	4.0293	0.756699	1.58478	11.2839	0.000781825	0.031986	331487	Uprt
Hypk|2310003F16Rik|HSPC136|-|2|2 E5|protein-coding	29.2564	33.7143	37.29	46.119	38.3718	35.6433	27.6902	30.7782	29.6814	24.8972	27.9088	-0.385548	5.04406	11.2896	0.00077942	0.031986	67693	Hypk
ENSMUST00000082397.1	84.7662	91.3232	111.272	181.446	140.952	118.433	87.2698	90.1998	79.7494	35.1837	80.2304	-0.704173	6.64723	11.2634	0.000790502	0.0322244	ENSMUST00000082397.1	ENSMUST00000082397.1
Rgs9|RGS9-1|Rgs9-2|-|11 E1|11 71.86 cM|protein-coding	9.78444	383.459	34.7492	10.0991	12.0232	9.29825	11.3195	16.1008	12.8888	13.4969	11.0213	-2.56135	5.56847	11.2347	0.000802811	0.0324433	19739	Rgs9
Vwf|6820430P06Rik|AI551257|B130011O06Rik|C630030D09|F8VWF|VWD|-|6 F3|6 59.32 cM|protein-coding	16.8564	27.0042	19.8781	15.7545	29.93	17.9409	19.5353	35.4039	29.7434	37.0837	44.7371	0.648517	4.74868	11.2353	0.000802583	0.0324433	22371	Vwf
Zdhhc21|9130404H11Rik|AL024349|D130004H04Rik|dep|-|4 39.4 cM|4 C3|protein-coding	59.3848	68.7379	65.8367	53.525	58.7088	64.1341	76.8632	83.2614	77.7665	73.3157	72.2311	0.312735	6.1015	11.238	0.000801398	0.0324433	68268	Zdhhc21
Zfp738|3830402I07Rik|6720487G11Rik|-|13|13 B3|protein-coding	8.62193	9.08322	9.26646	7.54063	9.46503	9.35785	15.2144	10.7635	13.4465	12.121	10.0732	0.472928	3.40885	11.2292	0.000805194	0.0324461	408068	Zfp738
Lamb3|-|-|1 H6|1 97.71 cM|protein-coding	1.93751	7.69209	2.24189	1.88516	1.53487	1.66892	0.973722	1.33432	0.681619	0.917265	1.54061	-1.36465	1.07427	11.2092	0.000813907	0.0327032	16780	Lamb3
Dennd4a|AI115600|AI851943|F730015K02Rik|-|9|9 C|protein-coding	83.2162	89.6047	77.7934	57.1606	72.5226	80.0484	98.9545	101.764	96.4181	102.799	90.0667	0.353806	6.43509	11.1749	0.000829123	0.0329371	102442	Dennd4a
Amer2|2600011E07Rik|Fam123a|-|14|14 D1|protein-coding	27.5127	21.4397	23.2409	13.3308	22.4475	21.9343	30.3071	29.7108	29.9293	28.6973	29.9235	0.460064	4.66967	11.1801	0.000826787	0.0329371	72125	Amer2
Lamc2|AA589349|-|1 G3|1 65.26 cM|protein-coding	3.00315	5.40083	2.0177	3.29902	3.58136	4.70873	6.87691	5.51518	5.20509	8.18987	5.56991	0.770081	2.32934	11.1842	0.000824952	0.0329371	16782	Lamc2
Ksr2|-|-|5|5 F|protein-coding	38.8471	25.7767	31.3117	11.2436	23.087	26.047	44.7912	43.4987	39.5959	40.6873	35.9674	0.653457	5.04081	11.1757	0.000828765	0.0329371	333050	Ksr2
Egr2|Egr-2|Krox-20|Krox20|NGF1-B|Zfp-25|Zfp-6|-|10 B5.1|10 34.96 cM|protein-coding	7.45943	12.3564	8.07079	8.81984	10.872	2.50337	1.5823	2.9355	1.73503	8.12435	1.42211	-1.40023	2.59582	11.1646	0.000833733	0.0330267	13654	Egr2
Zfp382|5930415A09Rik|Znf382|-|7|7 B1|protein-coding	16.2751	15.3024	13.9744	5.31884	10.872	9.83469	19.2919	19.1252	18.9614	19.6557	17.243	0.666439	3.92552	11.1375	0.000846021	0.033139	233060	Zfp382
Slc7a11|9930009M05Rik|AI451155|sut|xCT|-|3 C|3 21.72 cM|protein-coding	44.5628	40.9154	42.6706	26.7962	49.9472	30.1597	38.036	59.5105	50.006	66.2396	77.9195	0.575394	5.58594	11.1468	0.000841766	0.033139	26570	Slc7a11
Elob|0610040H15Rik|Tceb2|-|17|17 A3.3|protein-coding	29.4502	30.6865	24.8102	44.0319	26.4765	25.0934	22.5173	22.1497	21.6879	20.0488	22.1611	-0.470686	4.72241	11.138	0.000845771	0.033139	67673	Elob
Tomm6|1110002E23Rik|AI663970|-|17|17 C|protein-coding	87.1881	84.5312	76.2241	116.341	74.3133	72.1806	66.0305	62.7129	66.3649	60.1464	69.3276	-0.39046	6.24905	11.1235	0.000852418	0.033204	66119	Tomm6
Zfp799|6030490I01Rik|-|17|17 B1|protein-coding	32.9377	36.0874	31.8348	21.208	28.6509	28.9676	41.6266	40.7411	38.1087	36.4941	39.1079	0.391505	5.09981	11.1259	0.000851318	0.033204	240064	Zfp799
Tenm3|2610100B16Rik|Odz1|Odz3|Ten-m3|mKIAA1455|-|8|8 B1.1-B1.2|protein-coding	197.045	177.409	146.246	134.183	137.051	176.19	217.992	206.019	211.798	196.098	200.576	0.356586	7.50784	11.1181	0.000854912	0.0332089	23965	Tenm3
Crlf2|CRLM2|Ly114|Tpte2|Tslpr|-|5|5 F|protein-coding	9.78444	16.2025	11.2842	11.8496	10.2325	12.04	8.52007	9.69604	7.55977	6.81397	9.00667	-0.51922	3.37584	11.1081	0.000859496	0.0332205	57914	Crlf2
Phf23|JUNE-1|-|11 B3|11|protein-coding	34.4877	33.5506	34.3008	38.2418	30.6335	31.3518	26.7774	27.5759	26.893	26.1421	27.9088	-0.318456	4.9463	11.1072	0.000859947	0.0332205	78246	Phf23
Inf2|2610204M08Rik|AA589465|AW125550|EG629699|-|12|12 F1|protein-coding	167.111	432.148	178.379	129.537	140.121	140.01	128.775	112.794	101.871	101.62	123.96	-0.797774	7.31915	11.0894	0.000868208	0.0333558	70435	Inf2
Dhtkd1|C330018I04Rik|-|2|2 A1|protein-coding	7.9438	9.16505	7.17403	6.26141	7.67435	7.86775	9.49379	12.4536	9.54266	11.5969	10.725	0.484818	3.20392	11.0918	0.000867089	0.0333558	209692	Dhtkd1
Cotl1|1810074P22Rik|2010004C08Rik|Clp|-|8|8 E1|protein-coding	87.6725	58.9182	79.0638	86.4479	82.1156	76.5317	65.2394	62.0013	54.7774	57.3946	66.7797	-0.357395	6.14471	11.0488	0.000887459	0.0339488	72042	Cotl1
Taok1|2810468K05Rik|AU020252|D130018F14Rik|Map3k16|Markk|Psk2|mKIAA1361|-|11|11 B5|protein-coding	241.995	198.112	230.989	148.658	206.824	211.595	301.854	261.081	280.765	256.572	243.713	0.381722	7.87581	11.0466	0.000888484	0.0339488	216965	Taok1
Asb11|1110067L12Rik|1600009D24Rik|-|X|X F5|protein-coding	1.55001	5.319	1.94297	1.34654	1.0872	1.54971	0.973722	0.444772	0.867515	0.851746	1.12583	-1.28285	0.721007	11.0148	0.000903875	0.0343658	68854	Asb11
Kctd1|4933402K10Rik|AI661543|AW553000|-|18|18 A1|protein-coding	86.9943	115.054	72.7866	75.3389	66.9587	69.0216	63.9005	58.7099	61.3457	58.2463	61.2098	-0.415436	6.1671	11.0139	0.0009043	0.0343658	106931	Kctd1
Lama4|-|-|10 B1|10 20.02 cM|protein-coding	6.29692	7.36477	4.48377	4.71289	6.77901	5.42398	7.66806	9.42917	7.12602	10.352	9.36219	0.589686	2.8724	10.9813	0.000920335	0.0348807	16775	Lama4
Cd68|Lamp4|Scard1|gp110|-|11 B3|11 42.86 cM|protein-coding	8.52506	9.24688	7.47295	7.33865	9.33713	7.51012	5.35547	5.69309	6.56833	4.71736	6.1032	-0.530744	2.84665	10.9657	0.000928116	0.0350808	12514	Cd68
Tnk2|Ack|Ack-1|Ack1|Cdgip|Pyk1|-|16|16 B3|protein-coding	270.574	312.594	233.754	258.334	226.585	243.602	203.63	227.012	195.563	197.867	199.509	-0.33132	7.86813	10.9598	0.000931088	0.0350985	51789	Tnk2
Tmem258|1810006K21Rik|-|19|19 A|protein-coding	15.2095	13.7476	15.6932	18.7842	17.5231	13.1129	10.8327	9.51813	11.6495	11.4658	13.5693	-0.454966	3.79452	10.9307	0.000945842	0.0355591	69038	Tmem258
Tshz3|A630038G13Rik|Tsh3|Zfp537|mKIAA1474|teashirt3|-|7|7 B2|protein-coding	26.7377	35.8419	18.0098	26.8635	21.1684	34.3916	45.4606	30.6893	37.7369	45.4701	35.8489	0.524129	5.03344	10.9059	0.000958586	0.0359418	243931	Tshz3
Sdk2|4632412F08Rik|5330435L01Rik|Sdk-2|mKIAA1514|-|11|11 E2|protein-coding	17.4376	12.6838	14.7964	7.87726	13.6859	12.3381	19.3527	17.8798	17.0405	19.8522	19.3762	0.515327	3.98201	10.8947	0.00096442	0.0360642	237979	Sdk2
Bcl7b|-|-|5|5 G2|protein-coding	42.1409	43.6976	41.6243	49.9567	44.895	42.5574	39.5575	33.0021	35.6301	35.0526	34.7823	-0.309495	5.33631	10.8851	0.000969432	0.0361552	12054	Bcl7b
Map3k9|E130314H24Rik|Mlk1|Prke1|-|12|12 D1|protein-coding	102.107	95.6602	75.7757	60.325	80.7726	99.3601	107.901	114.751	111.042	128.745	105.058	0.40646	6.62137	10.8632	0.000980937	0.0363907	338372	Map3k9
Eea1|A430109M19Rik|B230358H09Rik|ZFYVE2|-|10|10 C2|protein-coding	79.2443	70.8655	79.1386	57.228	76.5517	72.1806	92.747	89.3992	93.1339	90.6782	86.6892	0.320501	6.33734	10.8664	0.000979246	0.0363907	216238	Eea1
Grasp|tamalin|-|15|15 F1|protein-coding	46.5972	38.215	47.7522	47.8022	38.7555	38.3255	35.5409	31.6678	35.3822	34.0698	32.9454	-0.336715	5.28313	10.8538	0.000985943	0.0364799	56149	Grasp
Zfas1|1500012F01Rik|Zfos1|-|2|2 H3|ncRNA	19.3751	19.6394	21.821	29.1526	17.5871	24.4377	18.1356	16.3676	13.9422	13.4314	17.4208	-0.474126	4.27419	10.8308	0.00099828	0.0368391	68949	Zfas1
Drap1|2310074H19Rik|NC2-alpha|-|19|19 A|protein-coding	122.257	90.7503	113.664	145.628	111.79	112.294	91.7733	90.1998	87.681	80.8504	100.081	-0.365062	6.70595	10.7972	0.00101652	0.0370409	66556	Drap1
Rpusd1|2310051D06Rik|AU019540|Rlucl|-|17|17 A3.3|protein-coding	44.6597	41.3245	45.1366	57.3626	46.8775	51.9748	39.4966	38.7841	37.3651	39.2458	35.7896	-0.330763	5.44616	10.8085	0.00101036	0.0370409	106707	Rpusd1
Btbd11|6330404E16Rik|-|10|10 C1|protein-coding	21.2158	20.3759	19.3549	22.2852	21.4242	25.9874	26.4122	34.7812	28.1942	28.8283	24.7683	0.387292	4.6449	10.7964	0.00101695	0.0370409	74007	Btbd11
Wbscr22|1110003N24Rik|-|5|5 G2|protein-coding	25.1877	21.6033	19.6539	23.8338	20.1452	19.2521	18.0139	16.3676	16.7926	15.4625	16.0579	-0.382017	4.27866	10.8041	0.00101276	0.0370409	66138	Wbscr22
Cdh18|B230220E17Rik|Cdh14l|-|15|15 A2|protein-coding	7.36255	10.8017	8.22025	8.14657	7.48249	10.3711	11.989	12.1868	12.1452	11.4003	12.2064	0.454037	3.37464	10.8119	0.0010085	0.0370409	320865	Cdh18
Dnal4|D15Ertd424e|Dnalc4|-|15 E1|15 37.85 cM|protein-coding	34.6815	31.914	35.1229	41.6754	32.616	34.2128	25.9862	29.5329	28.69	25.4213	29.6864	-0.331875	4.99548	10.774	0.00102937	0.0373612	54152	Dnal4
Rnase4|C730049F20Rik|Rab1|-|14|14 C1|protein-coding	23.347	29.9501	24.6607	27.9407	22.8312	23.3052	17.6487	16.3676	18.8994	20.5729	22.3982	-0.398205	4.50247	10.7709	0.00103108	0.0373612	58809	Rnase4
Chl1|A530023M13Rik|AI465420|CALL|LICAM2|-|6|6 E1|protein-coding	295.374	153.024	285.243	233.355	271.352	287.113	363.442	344.61	352.521	366.382	311.619	0.451623	8.21381	10.7169	0.0010616	0.0374183	12661	Chl1
Uqcrq|1100001F06Rik|1500040F11Rik|5830407L17Rik|9.5kDa|AA959903|QP-C|Qpc|Uqcrb|c1502|-|11|11 B1.3|protein-coding	74.2068	81.0125	73.6833	101.798	80.7086	83.0882	63.4745	63.0687	66.9845	64.4706	71.7571	-0.321912	6.23029	10.7118	0.00106454	0.0374183	22272	Uqcrq
Sbk1|Sbk|-|7|7 F3|protein-coding	89.4162	76.6754	72.1887	65.9132	74.1215	65.8626	57.693	67.6943	58.8671	53.8566	54.0992	-0.340809	6.06651	10.7112	0.00106489	0.0374183	104175	Sbk1
Exoc4|C78892|Sec8|Sec8l1|-|6 A3.3|6 14.59 cM|protein-coding	50.0847	46.889	51.115	37.6358	55.703	54.0014	61.3445	68.4949	61.2837	62.7016	59.7284	0.347692	5.79467	10.7536	0.00104075	0.0374183	20336	Exoc4
Mios|C81488|-|6|6 A1|protein-coding	20.4408	20.8669	23.0914	18.5823	20.401	20.6826	27.2034	23.2171	27.2648	29.6801	24.6498	0.354882	4.55108	10.7363	0.00105054	0.0374183	252875	Mios
C1qc|AI385742|C1qg|Ciqc|-|4 D3|4 69.05 cM|protein-coding	16.8564	19.9667	17.5614	22.4872	16.5638	15.7951	13.8755	13.7879	14.252	13.3659	13.036	-0.413774	4.02317	10.7567	0.00103901	0.0374183	12262	C1qc
Myo5a|9630007J19Rik|AI413174|AI661011|Dbv|MVa|Myo5|MyoVA|Sev-1|d|d-120J|flail|flr|-|9 D|9 42.26 cM|protein-coding	461.225	517.989	440.979	338.049	417.805	487.085	642.717	596.973	600.63	555.994	500.225	0.384298	8.98176	10.7132	0.00106372	0.0374183	17918	Myo5a
Dpy19l4|Gm1023|Narg3|-|4 A1|4|protein-coding	11.6251	14.6477	11.5083	5.18418	11.1918	10.4307	15.8838	16.4566	15.6772	15.8556	16.6505	0.584792	3.73674	10.7174	0.00106132	0.0374183	381510	Dpy19l4
Chst1|2610008E20Rik|AW125896|C6ST|GST-1|Gst1|KSGAL6ST|-|2|2 E1|protein-coding	330.346	304.083	334.041	358.382	307.102	306.008	285.301	246.493	254.182	255.262	269.074	-0.302851	8.20753	10.7069	0.00106734	0.0374183	76969	Chst1
Dtnbp1|5430437B18Rik|AW048963|Bloc1s8|dysbindin|sdy|-|13 A5|13 21.73 cM|protein-coding	46.0159	40.2607	43.0442	51.1685	40.2903	44.5243	36.2711	34.7812	33.8331	35.9044	37.2118	-0.312205	5.33723	10.7108	0.00106514	0.0374183	94245	Dtnbp1
Edil3|Del-1|Del1|-|13|13 C3|protein-coding	104.723	128.229	125.247	111.224	134.109	145.494	163.098	152.29	146.114	154.494	157.735	0.308969	7.11489	10.7192	0.00106028	0.0374183	13612	Edil3
Ccl17|Abcd-2|Scya17|Scya17l|Tarc|-|8 C5|8 46.85 cM|protein-coding	2.03439	1.39112	1.56932	1.54852	1.27906	1.96694	0.486861	0.978499	1.05341	0.851746	1.06658	-0.872904	0.499784	10.7418	0.00104745	0.0374183	20295	Ccl17
Zfp800|AA407452|Znf800|-|6|6 A3.2-A3.3|protein-coding	10.3657	12.5201	11.2842	8.61786	11.8952	11.5632	12.9018	14.4106	16.4828	17.0349	14.1025	0.440393	3.6996	10.72	0.00105982	0.0374183	627049	Zfp800
Adcy8|AC8|AW060868|-|15 D1|15 29.03 cM|protein-coding	24.2189	13.2566	18.3835	27.4021	23.4707	31.9478	30.3071	43.5877	32.5318	38.8527	27.7903	0.578482	4.83281	10.7005	0.00107108	0.0374557	11514	Adcy8
Glg1|AI593353|AW537898|CFR|CFR-1|ESL-1|MG-160|MG160|Selel|-|8 E1|8 57.98 cM|protein-coding	138.338	100.243	120.688	61.4022	117.865	122.248	156.648	160.296	153.178	148.859	143.87	0.470591	7.01745	10.6941	0.00107478	0.0374916	20340	Glg1
Reps2|POB1|-|X|X F4|protein-coding	310.971	211.614	281.357	189.526	251.847	281.63	351.879	332.868	354.132	324.974	308.834	0.394747	8.18497	10.6892	0.00107766	0.0374987	194590	Reps2
Vmn2r87|EG625131|-|10|10 D3|protein-coding	0.0968757	1.0638	0.971484	0.403962	0.575576	0.655646	0.791149	1.33432	1.54913	1.70349	1.3036	1.06036	0.140371	10.68	0.00108297	0.0375904	625131	Vmn2r87
Pnpt1|1200003F12Rik|Old35|PNPase|Pnptl1|-|11|11 A3.3|protein-coding	24.5095	24.5492	24.7355	22.0159	25.837	21.9939	27.1425	28.9102	30.7348	31.5801	31.6418	0.327338	4.74668	10.6582	0.00109585	0.0379436	71701	Pnpt1
Map3k2|9630061B06Rik|AI585793|Mekk2|Mekk2b|-|18|18 B1|protein-coding	41.4628	52.208	47.2291	29.9605	41.6973	38.5639	54.4067	57.4646	54.4675	54.3807	51.9068	0.382578	5.57734	10.6434	0.00110463	0.0381534	26405	Map3k2
Ipo7|A330055O14Rik|C330016G14|Imp7|Ranbp7|-|7|7 E3|protein-coding	104.626	79.2122	86.3126	69.2122	94.3945	95.3071	118.003	106.39	111.104	115.313	107.31	0.340885	6.62914	10.6269	0.00111457	0.0384019	233726	Ipo7
D630041G03Rik|-|-|7|7 A1|ncRNA	2.71252	3.02774	2.76499	1.81783	1.79068	2.62258	3.95575	3.55818	4.70937	3.60354	3.67377	0.679931	1.70569	10.6041	0.00112837	0.0387288	320749	D630041G03Rik
Gpr88|AW061286|Strg|-|3|3 G1|protein-coding	5.03753	499.577	43.1189	11.7149	4.22089	9.00023	8.21578	10.3187	12.1452	9.43473	11.7324	-3.20116	5.82123	10.5964	0.0011331	0.0387288	64378	Gpr88
Esrrg|ERR3|Errg|NR3B3|mKIAA0832|-|1|1 H5-H6|protein-coding	19.5689	23.2399	18.9066	19.5922	20.5928	26.1066	28.7248	26.3305	33.0275	28.1731	24.1165	0.394576	4.61891	10.5946	0.0011342	0.0387288	26381	Esrrg
Dnajb6|Mrj|mDj4|-|5|5 B1|protein-coding	12.7876	11.2108	13.9744	19.3902	14.8371	14.1858	11.6238	11.0304	10.0384	8.12435	10.3695	-0.496311	3.66066	10.5886	0.00113786	0.0387288	23950	Dnajb6
Gm20605|Lrch4-sap25|-|5 G2|ncRNA	69.6536	51.2261	54.1789	46.5903	54.4879	47.6833	42.2352	44.2993	38.0467	41.8011	44.026	-0.35696	5.60424	10.5927	0.00113537	0.0387288	100316903	Gm20605
Stard4|4632419C16Rik|9030213J02Rik|-|18 B1|18 18.18 cM|protein-coding	18.6001	26.3495	21.1485	18.9189	21.5521	24.6165	24.8299	30.7782	29.6194	33.9388	25.6571	0.402876	4.65793	10.5717	0.00114829	0.038989	170459	Stard4
Oaf|AL024221|D130038B21Rik|D9Ucla1|-|9 A5.1|9 24.24 cM|protein-coding	12.4001	15.3842	10.3127	13.9367	11.1918	8.5234	8.82436	6.76054	9.66659	6.68293	8.71039	-0.547689	3.36791	10.5616	0.00115463	0.0391095	102644	Oaf
Gng4|-|-|13 A1|13 5.29 cM|protein-coding	20.0533	39.0333	21.5221	30.2298	20.4649	29.8021	32.1937	46.968	39.1621	35.7078	37.5673	0.510956	5.0093	10.5143	0.00118453	0.0395772	14706	Gng4
Zfp518a|2810401C22Rik|6330417C12Rik|AI426493|Zfp518|Znf518|Znf518a|mKIAA0335|-|19 C3|19|protein-coding	16.7595	17.9209	17.4867	13.9367	16.4359	15.8547	22.0305	21.527	20.0148	21.8833	19.6132	0.359119	4.22023	10.5236	0.00117861	0.0395772	72672	Zfp518a
Hdx|D030011N01Rik|Gm380|-|X|X E1|protein-coding	2.42189	4.41886	3.06391	0.875251	1.66278	1.72852	4.50346	5.33727	4.77133	4.91392	3.31825	0.961622	1.80153	10.5217	0.0011798	0.0395772	245596	Hdx
Gipc1|GIPC|Glut1CIP|Rgs19ip1|Semcap1|TIP-2|TaxIP2|-|8|8 C2|protein-coding	44.2722	46.0707	43.3431	52.2458	40.4183	43.9879	35.6626	38.2504	37.4271	34.0698	36.797	-0.306753	5.36667	10.513	0.00118537	0.0395772	67903	Gipc1
Ubc|2700054O04Rik|AI194771|Rps27a|TI-225|Uba52|Ubb|-|5 G1.1|5 64.18 cM|protein-coding	116.057	106.135	110.674	153.034	114.476	123.44	99.5022	100.43	93.3198	79.7366	99.7844	-0.352045	6.76704	10.5273	0.00117624	0.0395772	22190	Ubc
Myom1|D430047A17Rik|-|17|17 E1.3|protein-coding	3.1969	3.51872	3.21337	3.43368	2.94184	3.75506	3.65146	6.0489	5.32902	5.176	5.51066	0.612298	2.10656	10.5028	0.00119191	0.0396069	17929	Myom1
Bcas1|2210416M21Rik|9030223A09Rik|AI841227|NABC1|-|2|2 H3|protein-coding	139.888	167.017	139.894	108.666	134.749	111.817	116.299	91.6231	93.3198	97.1646	114.598	-0.380408	6.90268	10.5031	0.00119175	0.0396069	76960	Bcas1
Rictor|4921505C17Rik|6030405M08Rik|AVO3|AW492497|D530039E11Rik|-|15|15 A1|protein-coding	73.8192	80.6033	77.1956	50.226	73.5459	75.2801	94.1468	94.3807	92.8861	91.53	86.3336	0.35617	6.34069	10.479	0.00120741	0.0397454	78757	Rictor
Uhmk1|4732477C12Rik|4930500M09Rik|AA673513|AI449218|AU021979|C820018A03Rik|KIS|Kist|OTTMUSG00000021542|P-CIP2|-|1|1 H3|protein-coding	60.741	35.6782	48.1258	15.5525	42.0171	43.511	69.0126	66.9827	70.0828	60.7361	60.1432	0.676843	5.70549	10.4862	0.00120267	0.0397454	16589	Uhmk1
Prkg1|AW125416|CGKI|Gm19690|Prkg1b|Prkgr1b|-|19|19 C1|protein-coding	20.6345	15.2205	21.5968	14.004	21.6161	20.027	25.8036	25.1741	25.7776	24.8317	24.1165	0.415258	4.45063	10.4887	0.00120104	0.0397454	19091	Prkg1
Eif5a2|9630038B20|eIF5AII|-|3|3 A3|protein-coding	60.1598	50.3259	58.7374	41.9447	61.3948	64.6109	79.1149	73.9212	77.2708	63.9465	68.1425	0.366863	5.99447	10.4802	0.00120662	0.0397454	208691	Eif5a2
Zbed6|Gm8466|MGR|-|1|1 E4|protein-coding	30.3221	30.4411	24.586	4.71289	15.8603	12.5169	47.7732	42.3423	44.6151	34.5285	26.783	0.992432	4.84241	10.4693	0.00121372	0.0397737	667118	Zbed6
Ndufb11|D5Bwg0566e|D5Bwg0577e|NP15.6|Np15|-|X|X A1.3|protein-coding	29.9346	27.086	28.9951	41.4061	29.1625	27.4179	23.7953	22.2386	24.972	20.3109	24.6498	-0.402491	4.77623	10.469	0.00121394	0.0397737	104130	Ndufb11
Frrs1l|6430704M03Rik|-|4|4 B3|protein-coding	211.48	138.949	192.727	86.8519	176.126	179.647	262.54	223.009	236.212	227.613	224.456	0.515234	7.61822	10.4452	0.00122966	0.0401946	230235	Frrs1l
Atp5e|2410043G19Rik|ATPE|AV000645|-|2|2 H4|protein-coding	48.7285	53.5173	43.2684	72.5785	43.1043	45.9548	36.8797	37.4498	41.3929	37.8044	39.2857	-0.408465	5.51017	10.4176	0.00124818	0.0407051	67126	Atp5e
Mt1|MT-I|Mt-1|-|8 C5|8 46.34 cM|protein-coding	223.783	220.452	225.459	328.691	197.87	191.985	169.61	139.658	178.522	182.994	193.051	-0.420981	7.67856	10.3922	0.00126549	0.0408633	17748	Mt1
C2|-|-|17 B1|17 18.41 cM|protein-coding	0.193751	0.736477	0.149459	0.336635	1.40696	0.953667	1.15629	2.04595	1.4252	0.786227	3.02197	1.36953	0.357531	10.4019	0.00125886	0.0408633	12263	C2
Sox5|A730017D01Rik|AI528773|-|6 G3|6 76.14 cM|protein-coding	47.0816	44.6796	35.8702	38.1071	43.8078	52.0344	55.2587	54.707	57.0701	58.1808	50.544	0.338976	5.61482	10.3891	0.0012676	0.0408633	20678	Sox5
Alx4|lst|-|2 E1|2 51.62 cM|protein-coding	0.775005	0.900139	1.12094	0.875251	1.59882	0.953667	0.791149	2.49072	2.29272	1.90005	3.08123	1.00078	0.749613	10.3937	0.00126444	0.0408633	11695	Alx4
Tcp11l1|C130096D04Rik|-|2|2 E2|protein-coding	13.272	7.36477	7.32349	3.43368	8.76155	7.39092	19.657	18.9473	14.4379	8.91058	9.18443	0.847668	3.4447	10.3929	0.00126502	0.0408633	320554	Tcp11l1
Hivep1|Cryabp1|-|13 A4|13 20.72 cM|protein-coding	64.3254	80.5215	44.6135	43.5606	52.7612	77.4258	80.2712	86.7306	83.3434	85.9609	80.823	0.462932	6.15148	10.3843	0.00127092	0.0408763	110521	Hivep1
Rpl14-ps1|ENSMUSG00000046721|Gm9811|-|7 B3|7|pseudo	93.0006	109.244	96.4758	140.915	101.11	105.976	78.2021	78.0131	87.0613	89.8265	88.526	-0.354316	6.6039	10.3741	0.00127794	0.0409634	100040970	Rpl14-ps1
Gabrb2|AI834970|C030002O17Rik|C030021G16Rik|Gabrab2|Gabrb-2|-|11 A5|11 25.08 cM|protein-coding	354.565	281.089	355.937	298.528	338.375	395.056	454.059	394.335	446.894	438.977	404.352	0.342816	8.56434	10.3719	0.00127947	0.0409634	14401	Gabrb2
Lsp1|Lsp-1|WP34|p50|pp52|-|7 F5|7 87.93 cM|protein-coding	2.80939	5.56449	2.61553	4.84755	4.41275	3.51665	1.39973	2.22386	2.97434	2.4242	2.25167	-0.814465	1.72825	10.3593	0.00128824	0.0411504	16985	Lsp1
Aldh1a2|AV116159|Aldh1a7|Raldh1|Raldh2|-|9 D|9 39.85 cM|protein-coding	4.55316	4.74619	5.23107	5.65547	10.4243	4.05308	2.98202	12.0089	13.0747	14.6107	15.4061	1.00322	3.10741	10.3253	0.00131222	0.0418211	19378	Aldh1a2
Snrpf|2010013O18Rik|SMF|sm-F|snRNP-F|-|10|10 C2|protein-coding	5.52191	5.48266	6.20255	9.49311	6.65111	5.48358	4.19918	3.914	4.8333	2.81731	4.62184	-0.666373	2.46529	10.3102	0.00132298	0.0420684	69878	Snrpf
Ackr1|AA162249|CCBP1|CD234|Darc|Dfy|ESTM35|FY|GPD|-|1 H3|1 80.33 cM|protein-coding	35.844	37.724	34.1514	41.6081	30.6335	33.3187	30.1245	28.1096	29.8673	26.5352	27.257	-0.323539	5.01817	10.3009	0.00132965	0.0421848	13349	Ackr1
Car11|Ca11|-|7|7 B3|protein-coding	129.329	239.028	120.464	154.718	116.011	111.996	107.657	100.519	100.198	103.913	100.199	-0.502568	6.97615	10.2824	0.00134305	0.042418	12348	Car11
Trim23|6330516O20Rik|AI450195|Arfd1|-|13|13 D1|protein-coding	56.3816	49.9986	60.6804	42.5507	56.5983	60.4982	66.5174	66.6269	73.4909	66.6328	69.2091	0.331142	5.93061	10.2706	0.00135164	0.0425934	81003	Trim23
Ankrd26|5730521P14Rik|BC008111|mKIAA1074|-|6|6 F1|protein-coding	15.0157	17.0208	15.469	10.2337	15.0289	14.3646	18.3181	19.0363	19.2093	20.4419	19.5539	0.413946	4.07421	10.2617	0.00135822	0.0427048	232339	Ankrd26
Mta3|1110002J22Rik|mKIAA1266|-|17|17 E4|protein-coding	52.8941	38.5423	52.0865	38.2418	50.2031	50.9616	59.4579	59.3326	60.0444	62.5051	58.3063	0.346064	5.73102	10.2486	0.00136788	0.0427185	116871	Mta3
Cpeb3|4831444O18Rik|CPE-BP3|mKIAA0940|-|19|19 C2|protein-coding	100.266	91.6505	97.8957	67.7983	87.1039	95.6051	118.733	114.662	114.822	113.02	104.288	0.329417	6.65349	10.2446	0.00137084	0.0427185	208922	Cpeb3
Col1a2|AA960264|AI325291|Col1a-2|Cola-2|Cola2|oim|-|6 A1|6 1.81 cM|protein-coding	7.65318	11.4563	9.49065	9.89707	20.7847	7.62933	7.42463	18.5025	23.8567	24.6351	31.1085	0.91821	3.99029	10.2513	0.00136588	0.0427185	12843	Col1a2
Nav3|4732483H20Rik|9630020C08Rik|POMFIL1|Pomfil1p|mKIAA0938|unc53H3|-|10|10 D1|protein-coding	74.9818	52.1262	60.6056	28.5467	57.5576	56.8028	82.6447	82.8166	75.7217	77.0503	73.5347	0.508932	6.0399	10.2393	0.00137477	0.0427458	260315	Nav3
D430020J02Rik|-|-|12|12 F2|ncRNA	5.52191	8.59223	4.5585	4.37626	4.92438	7.92735	8.88521	9.42917	9.41873	9.6968	8.29561	0.610622	2.92134	10.1885	0.00141317	0.0436536	319545	D430020J02Rik
Cep85l|ENSMUSG00000038594|Gm9766|-|10 B3|10|protein-coding	10.3657	5.48266	8.22025	4.10695	6.97087	8.10617	10.6501	11.2972	9.72856	12.8417	10.3103	0.60969	3.17798	10.193	0.00140972	0.0436536	100038725	Cep85l
Hells|AI323785|E130115I21Rik|LSH|Lysh|PASG|YFK8|-|19|19 C3|protein-coding	2.42189	2.53675	2.39134	2.15446	2.94184	2.56298	3.95575	4.0919	3.71792	4.19321	3.25899	0.610626	1.70577	10.1884	0.0014133	0.0436536	15201	Hells
Rplp2-ps1|Gm7852|-|12 C3|12|pseudo	40.9784	43.3703	36.0196	50.024	37.4125	38.2659	30.9157	34.6922	30.5489	33.0215	34.012	-0.330111	5.22186	10.168	0.00142903	0.0438216	665931	Rplp2-ps1
Ccdc85b|AI842788|BB115872|-|19|19 A|protein-coding	75.563	67.0194	75.4021	91.2954	71.8191	77.843	61.4662	67.1606	62.8329	54.4462	61.7431	-0.315229	6.12547	10.1681	0.00142889	0.0438216	240514	Ccdc85b
5730522E02Rik|-|-|11|11 A3.2-A3.3|ncRNA	2.13126	1.55479	1.2704	0.875251	1.15115	1.4305	3.34717	2.13491	2.41665	2.62076	1.65912	0.82195	1.00974	10.1728	0.0014253	0.0438216	70626	5730522E02Rik
Dzank1|2810039F03Rik|6330439K17Rik|6430408C01|AI851115|Ankrd64|-|2|2 G1|protein-coding	226.689	301.546	223.292	212.484	227.8	280.974	310.313	326.73	313.173	324.45	282.288	0.343065	8.10633	10.1651	0.00143124	0.0438216	241688	Dzank1
Neat1|2310043N10Rik|VINC|-|19|19 A|ncRNA	173.214	182.564	183.461	152.024	231.19	168.978	127.132	110.215	131.367	131.038	184.992	-0.409017	7.33644	10.1463	0.00144594	0.0441752	66961	Neat1
Erf|-|-|7 A3|7 13.73 cM|protein-coding	29.2564	42.552	35.8702	32.2496	35.366	29.3252	28.2379	24.9962	26.5212	27.649	25.8942	-0.353773	4.94687	10.1176	0.00146861	0.044651	13875	Erf
Rai14|1700008J19Rik|1700020L11Rik|Ankycorbin|Norpeg|mKIAA1334|-|15|15 A1|protein-coding	10.0751	17.1845	9.34119	14.8119	10.936	13.6494	15.2753	17.9688	17.908	18.8039	19.1392	0.490316	3.92354	10.1145	0.00147107	0.044651	75646	Rai14
Rab30|5033421K01Rik|AI323892|Rsb30|-|7|7 E1|protein-coding	11.0438	11.2926	10.2379	6.59805	9.59294	7.62933	14.4841	13.3432	13.0127	11.7934	12.3842	0.475935	3.48114	10.0899	0.00149084	0.0451534	75985	Rab30
Pgm2l1|4931406N15Rik|AI553438|BM32A|-|7|7 E2|protein-coding	524.679	299.91	532.747	367.202	489.879	565.882	689.517	608.537	668.606	623.806	595.744	0.459611	9.08371	10.0718	0.00150557	0.0454035	70974	Pgm2l1
Hdac9|AV022454|D030072B18Rik|HD7B|HD9|HDRP|Hdac7b|Mitr|mKIAA0744|-|12|12 A3|protein-coding	45.5316	31.1775	44.5388	42.0794	50.267	51.9152	56.4759	59.6884	60.1064	55.298	54.9881	0.371163	5.65413	10.0734	0.00150426	0.0454035	79221	Hdac9
F13a1|1200014I03Rik|AI462306|F13a|-|13|13 A3.3|protein-coding	1.16251	2.20943	2.09243	1.95248	3.13369	1.25169	2.06916	5.0704	3.28416	3.27595	4.7996	0.892974	1.5371	10.0373	0.00153403	0.0459799	74145	F13a1
Klk6|AI849898|BSP|Bssp|Klk29|MSP|Prss18|Prss9|neurosin|-|7 B3|7 28.28 cM|protein-coding	4.65003	13.8294	3.13864	2.28912	3.06974	1.90733	1.27801	1.77909	1.797	2.4242	2.13316	-1.34361	1.80831	10.0367	0.00153452	0.0459799	19144	Klk6
Mrpl20|2610008D01Rik|4930425I20Rik|-|4 E2|4 87.44 cM|protein-coding	22.3783	21.3578	23.5398	28.1427	22.9591	25.153	19.1702	19.2142	18.7135	16.9039	19.7317	-0.354003	4.44006	10.0298	0.00154032	0.0460552	66448	Mrpl20
Fbln5|A55|DANCE|EVEC|-|12|12 E|protein-coding	3.87503	4.00971	3.81121	3.09704	6.33134	3.93387	3.34717	6.49368	7.93156	8.38642	10.0732	0.792056	2.52429	10.0236	0.00154549	0.0461116	23876	Fbln5
Tmem119|AW208946|BC025600|obif|-|5|5 F|protein-coding	16.6626	17.1845	15.0206	14.8119	12.7266	11.8612	10.4675	10.6745	12.455	10.6141	10.251	-0.426912	3.70777	10.0086	0.00155811	0.0463894	231633	Tmem119
Tnik|1500031A17Rik|4831440I19Rik|AI451411|C530008O15Rik|C630040K21Rik|-|3|3 A3|protein-coding	169.339	183.874	178.604	117.149	155.086	158.13	203.69	219.006	202.751	202.388	187.066	0.340234	7.49075	9.99651	0.00156837	0.0464974	665113	Tnik
Trem2|TREM-2|Trem2a|Trem2b|Trem2c|-|17|17 C|protein-coding	9.88132	11.62	11.7325	13.4654	10.5522	8.76181	7.30292	8.80649	7.24995	7.73124	8.76965	-0.467008	3.28367	9.98088	0.00158174	0.0467949	83433	Trem2
Tac1|4930528L02Rik|NK-1|NK1|Nkna|PPT-A|PPTA|SP|-|6 A1|6 3.31 cM|protein-coding	4.74691	129.456	15.0954	9.56044	5.30809	5.30477	4.26003	10.1408	6.63029	5.96222	5.21439	-2.13185	4.1853	9.96938	0.00159165	0.0468901	21333	Tac1
Pou3f1|Oct-6|Oct6|Otf-6|Otf6|Scip|Test1|Tst-1|Tst1|-|4 D2.2|4 57.86 cM|protein-coding	106.273	52.4535	75.7757	79.1093	72.7784	81.7769	65.2394	54.2622	55.3351	59.2946	57.0027	-0.421121	6.11117	9.96972	0.00159135	0.0468901	18991	Pou3f1
Egr1|A530045N19Rik|ETR103|Egr-1|Krox-1|Krox-24|Krox24|NGF1-A|NGFI-A|NGFIA|TIS8|Zenk|Zfp-6|Zif268|egr|-|18 B1|18 18.76 cM|protein-coding	265.633	235.509	187.272	187.842	221.341	133.335	123.906	130.585	125.914	214.968	104.11	-0.552002	7.45565	9.94624	0.00161178	0.0471254	13653	Egr1
Pdyn|Dyn|-|2 F1|2 63.19 cM|protein-coding	7.45943	82.4036	16.3658	13.7347	11.8952	9.89429	10.2849	7.47217	7.8696	8.84506	8.8289	-1.44569	4.07146	9.94401	0.00161374	0.0471254	18610	Pdyn
Ldlr|Hlb301|-|9 A3|9 7.87 cM|protein-coding	16.5657	22.5035	19.2802	19.5248	24.8137	23.1264	24.4039	33.18	25.9635	33.7423	23.8795	0.42311	4.61035	9.94846	0.00160984	0.0471254	16835	Ldlr
Dgkz|E130307B02Rik|ENSMUSG00000075035|F730209L11Rik|mDGK[z]|-|2|2 E1|protein-coding	674.545	408.499	546.796	514.782	531.065	543.888	445.234	413.549	393.356	400.845	426.454	-0.367512	8.91238	9.94093	0.00161644	0.0471254	104418	Dgkz
Mrps18c|1110037D14Rik|-|5|5 E4|protein-coding	11.722	10.5562	11.3589	14.8793	10.3604	9.71548	7.6072	7.82799	8.48925	8.84506	8.76965	-0.457662	3.34086	9.95476	0.00160434	0.0471254	68735	Mrps18c
Dennd4c|1700065A05Rik|AA420392|-|4|4 C4|protein-coding	10.6563	13.3384	10.5369	5.38616	11.1918	9.17904	15.397	14.9443	13.3226	15.8556	13.4507	0.541723	3.6149	9.93382	0.00162269	0.0472096	329877	Dennd4c
Lcor|3110023F06Rik|A630025C20Rik|Mlr2|mKIAA1795|-|19|19 C3|protein-coding	3.77815	2.94591	3.43756	0.471289	1.59882	1.25169	5.1729	5.15936	4.8333	5.50359	3.08123	1.09609	1.80636	9.90735	0.0016462	0.0477943	212391	Lcor
Ntsr1|NT-1R|NTR-1|NTR1|-|2 H4|2 103.04 cM|protein-coding	7.1688	4.90985	3.06391	5.38616	3.64532	6.73527	7.91149	9.60708	7.18798	8.05883	7.70307	0.652086	2.72703	9.90169	0.00165127	0.0478425	18216	Ntsr1
Klf16|AI843742|BTEB4|DRRF|-|10|10 C1|protein-coding	45.4347	49.1803	45.2861	43.5606	37.7962	40.054	36.9406	35.5818	35.9399	33.4802	34.3675	-0.302517	5.3179	9.88144	0.00166954	0.0482721	118445	Klf16
Pank3|-|-|11|11 A4|protein-coding	89.9975	81.5035	86.9852	60.3923	92.0283	88.5718	108.448	106.39	106.209	108.892	95.5773	0.336484	6.54424	9.86079	0.00168839	0.0487165	211347	Pank3
Tfap2b|AI606113|AP-2(beta)|E130018K07Rik|Tcfap2b|-|1|1 A3|protein-coding	0.968757	1.14563	0.149459	0.269308	0.703482	0.536437	0.426003	3.73609	1.36324	1.31038	1.59987	1.4145	0.271093	9.84126	0.00170641	0.0491355	21419	Tfap2b
Lrrc8b|R75581|Ta-lrrp|mKIAA0231|-|5|5 E5|protein-coding	49.3097	39.0333	43.1937	21.2753	39.7148	45.18	61.1011	52.8389	50.6877	52.0876	58.3063	0.474864	5.54718	9.83108	0.00171587	0.0492394	433926	Lrrc8b
Carhsp1|1200011K09Rik|Crhsp-24|D16Ertd465e|-|16 A1|16 4.26 cM|protein-coding	28.3846	58.018	31.0127	28.816	26.0928	24.7953	22.5782	20.1037	21.1302	23.3247	23.761	-0.564194	4.81151	9.82812	0.00171864	0.0492394	52502	Carhsp1
ENSMUST00000082391.1	69.363	57.4452	68.527	100.519	85.633	78.3795	47.1038	79.9701	40.9591	19.9833	46.4554	-0.710617	5.98216	9.82607	0.00172055	0.0492394	ENSMUST00000082391.1	ENSMUST00000082391.1
Dok6|Dok-6|-|18|18 E4|protein-coding	20.6345	12.3564	14.4228	4.64556	9.33713	9.71548	22.0913	21.2601	19.5191	18.0177	17.8948	0.743403	3.95803	9.81533	0.00173063	0.0493862	623279	Dok6
Bod1l|A230054D04Rik|AI853319|FAM44A|mKIAA1327|-|5|5 B3|protein-coding	105.498	88.7046	95.878	73.3865	88.1271	91.552	120.011	110.57	122.32	105.027	104.228	0.313741	6.65278	9.81311	0.00173273	0.0493862	665775	Bod1l
Pde4d|9630011N22Rik|Dpde3|-|13 D2.1|13 59.69 cM|protein-coding	92.5163	77.8211	77.7934	66.5864	75.4645	94.115	103.641	100.43	99.7642	101.751	94.8663	0.310828	6.4865	9.78773	0.0017568	0.0498697	238871	Pde4d
1110038F14Rik|-|-|15|15 D3|protein-coding	13.9501	15.7115	14.9459	19.1882	15.3487	14.1262	12.2932	10.6745	12.6409	11.0727	12.3842	-0.394234	3.80605	9.78134	0.00176292	0.0499422	117171	1110038F14Rik

## Sheet: 13mths+CMS121_vs_13mths
Gene	13mths+CMS121_rep1	13mths+CMS121_rep2	13mths+CMS121_rep3	13mths+CMS121_rep4	13mths+CMS121_rep5	13mths+CMS121_rep6	13mths_rep1	13mths_rep2	13mths_rep3	13mths_rep4	13mths_rep5	13mths_rep6	logFC	logCPM	LR	PValue	FDR	GeneID	Symbol
Fmod|AI131919|AU041740|SLRR2E|-|1 E4|1 58.09 cM|protein-coding	54.1667	16.5633	33.9988	46.4529	28.5959	55.3838	7.3977	9.90687	8.57101	6.84993	16.8756	6.38953	-2.06866	4.61748	61.7332	3.93296e-15	5.50339e-11	14264	Fmod
Myh11|AV071570|SM1|SM2|smMHC|-|16 A1|16 9.71 cM|protein-coding	36.6127	16.5633	61.2944	42.1301	37.3512	48.1755	11.9726	12.3631	12.4806	10.9464	20.4182	11.1668	-1.6096	4.76072	52.5556	4.18248e-13	1.95085e-09	17880	Myh11
Ranbp3l|C130037N17Rik|-|15|15 A1|protein-coding	22.9993	9.95561	16.8922	18.8007	9.46137	18.261	5.74295	4.9125	5.2629	6.31268	7.47165	4.95637	-1.47452	3.4786	53.3066	2.85352e-13	1.95085e-09	223332	Ranbp3l
Ptgds|21kDa|L-PGDS|PGD2|PGDS|PGDS2|Ptgs3|-|2 A3|2 17.28 cM|protein-coding	577.993	161.669	351.947	492.181	237.382	633.009	67.358	109.958	85.259	111.479	175.648	88.0203	-1.94395	8.01114	50.6807	1.08681e-12	3.80192e-09	19215	Ptgds
Slc22a6|NKT|Oat1|Orctl1|mOat1|-|19 A|19 5.44 cM|protein-coding	17.4824	5.63857	10.6179	14.2721	7.06072	15.1374	2.33612	3.35687	2.78182	3.35781	5.08845	2.26918	-1.86556	2.94283	49.584	1.9006e-12	5.31902e-09	18399	Slc22a6
Nkain3|C530048M05|E130310K16Rik|-|4|4 A3|protein-coding	12.8252	12.863	10.4571	5.96958	12.2151	7.92913	4.5749	2.04687	5.11253	2.61909	2.9629	2.14975	-1.68376	2.79637	47.9048	4.47433e-12	1.04349e-08	269513	Nkain3
Slc47a1|1300013J15Rik|AI036982|MATE1|mMATE1|-|11|11 B2|protein-coding	4.72884	1.58585	2.78855	2.74463	1.12972	3.96457	0.778706	0.49125	0.601474	0.335781	0.515286	0.597153	-2.35806	0.905689	46.8207	7.77887e-12	1.555e-08	67473	Slc47a1
Aebp1|ACLP|-|11|11 A1|protein-coding	52.4471	17.0919	31.7466	34.3765	25.1362	43.9106	10.9992	14.4919	12.5558	11.5509	17.1977	8.65871	-1.44036	4.56003	45.4426	1.57181e-11	2.7493e-08	11568	Aebp1
Slc6a20a|A730081N20Rik|AU022428|Xt3s1|Xtrp3s1|-|9 F4|9 74.26 cM|protein-coding	13.6133	3.61221	10.0817	11.5961	6.91951	13.1552	3.3095	2.21062	2.55627	2.68625	4.05788	2.26918	-1.78864	2.71799	45.1946	1.78399e-11	2.77371e-08	102680	Slc6a20a
Mrc1|AW259686|CD206|MR|-|2 A2|2 10.46 cM|protein-coding	10.1025	5.28616	6.54236	8.09667	5.8604	6.90796	2.23878	2.9475	3.38329	1.94753	3.67141	1.9706	-1.40352	2.34842	43.1625	5.03778e-11	7.04937e-08	17533	Mrc1
Col12a1|-|-|9 E1|9 43.82 cM|protein-coding	21.9246	15.418	19.5198	14.5466	14.4039	19.4023	6.32698	10.0706	10.601	8.32736	10.0481	8.18099	-0.972	3.74767	42.9571	5.59531e-11	7.11774e-08	12816	Col12a1
Acta2|0610041G09Rik|Actvs|SMalphaA|a-SMA|alphaSMA|-|19|19 C1|protein-coding	32.3137	13.4797	58.5595	44.6689	30.4317	43.0696	8.85778	12.8544	11.428	13.4984	18.7435	7.8227	-1.60354	4.6424	39.5227	3.2427e-10	3.78125e-07	11475	Acta2
Slc13a3|NaDC-3|NaDC3|SDCT2|-|2|2 H3|protein-coding	35.9678	17.3562	24.3462	30.3968	19.8406	37.0627	14.9901	13.3456	13.9091	13.6999	13.4619	10.0919	-1.05704	4.36271	38.1062	6.69972e-10	7.21147e-07	114644	Slc13a3
Ddr2|AW495251|Ntrkr3|tyro10|-|1 H3|1 76.84 cM|protein-coding	23.5725	16.8276	23.5418	16.8109	20.9703	22.1655	10.0258	7.94187	11.1273	8.7303	15.9739	8.65871	-0.986939	3.97616	37.4382	9.43575e-10	9.43103e-07	18214	Ddr2
Aldh1a2|AV116159|Aldh1a7|Raldh1|Raldh2|-|9 D|9 39.85 cM|protein-coding	29.3761	7.92925	17.6966	19.6927	10.6617	24.6884	4.5749	4.74875	5.2629	5.64112	10.499	4.06064	-1.658	3.62424	35.933	2.04216e-09	1.72156e-06	19378	Aldh1a2
Alx4|lst|-|2 E1|2 51.62 cM|protein-coding	4.15564	2.11447	3.59294	3.36218	1.76518	4.14477	0.778706	0.900624	1.12776	0.87303	1.61027	0.955444	-1.60139	1.20724	36.0082	1.96493e-09	1.72156e-06	11695	Alx4
Atp5k|2610008D24Rik|Atp5i|Lfm1|-|5 F|5 53.11 cM|protein-coding	14.3298	18.6778	13.621	18.7321	15.3218	18.0808	26.3787	26.6912	26.8408	39.4878	25.3778	25.9761	0.792577	4.49633	35.8697	2.10967e-09	1.72156e-06	11958	Atp5k
Colec12|CL-P1|SRCL|Scara4|-|18|18 A1|protein-coding	20.8499	6.5196	16.624	15.0955	10.8029	17.4201	5.74295	7.61437	5.93956	3.89506	6.63431	5.0758	-1.32775	3.38043	35.7752	2.21454e-09	1.72156e-06	140792	Colec12
Olfml2a|4932431K08Rik|mFLJ00237|-|2|2 B|protein-coding	4.22729	1.76205	3.21756	2.53879	1.76518	3.96457	0.486691	1.47375	0.676658	0.604405	1.15939	0.298576	-1.89929	1.02413	34.3212	4.67271e-09	3.16216e-06	241327	Olfml2a
Xkr4|AY534250|Gm210|XRG4|mKIAA1889|-|1|1 A1|protein-coding	19.4885	20.1755	16.6777	10.5668	19.1346	13.4555	9.44181	5.64937	10.3002	3.22349	6.24785	5.97153	-1.28937	3.56343	34.291	4.74561e-09	3.16216e-06	497097	Xkr4
Vwf|6820430P06Rik|AI551257|B130011O06Rik|C630030D09|F8VWF|VWD|-|6 F3|6 59.32 cM|protein-coding	63.2661	27.8405	43.1689	41.787	37.8455	62.2317	16.9368	27.0187	19.999	15.7145	30.1442	17.9743	-1.1117	5.08295	34.377	4.5406e-09	3.16216e-06	22371	Vwf
Rpl35a|2810431L15Rik|Rpl35|-|16|16 B3|protein-coding	0.358245	1.05723	0.321756	0.411695	0.353036	1.08125	1.75209	2.04687	1.50369	2.95487	1.61027	2.3289	1.78431	0.526023	33.9822	5.56175e-09	3.53753e-06	57808	Rpl35a
Slc6a13|GAT3|Gabt3|Gat2|-|6|6 F1|protein-coding	21.1365	6.69581	10.8324	14.8896	8.8259	16.3388	3.69885	3.43875	5.714	4.9024	7.1496	2.86633	-1.49973	3.18534	33.7151	6.38032e-09	3.88173e-06	14412	Slc6a13
Crispld2|1810049K24Rik|Lcrisp2|Lgl1|coffeecrisp|-|8|8 E1|protein-coding	7.52315	4.75755	5.68435	7.54774	4.73068	8.58989	2.43346	2.86562	3.45848	2.55193	2.76966	3.46349	-1.14234	2.28966	33.2675	8.0315e-09	4.32827e-06	78892	Crispld2
Erbb4|Her4|c-erbB-4|-|1 C3|1 33.8 cM|protein-coding	98.0159	106.957	110.362	94.6898	104.781	101.036	78.7466	73.5237	71.801	56.6126	71.3027	76.973	-0.522535	6.4466	33.2649	8.04224e-09	4.32827e-06	13869	Erbb4
Svep1|1110021D17Rik|4833413O10Rik|AA387071|D430029O09Rik|Polydom|-|4|4 B3|protein-coding	3.86905	2.73118	3.21756	2.95048	2.9655	4.26491	1.75209	0.736874	1.27813	1.00734	1.99673	1.07487	-1.35411	1.31646	33.4026	7.49226e-09	4.32827e-06	64817	Svep1
Cd163|CD163v2|CD163v3|-|6|6 F2|protein-coding	3.43915	2.37877	2.78855	3.43079	3.03611	3.9045	1.36273	1.6375	1.35332	1.0745	1.54586	0.477722	-1.37103	1.23988	32.5063	1.18807e-08	6.1573e-06	93671	Cd163
Manf|3230402M22Rik|AA407711|AA408789|AA673178|Armet|D17914|D18Mgi17|-|9 F1|9 57.98 cM|protein-coding	36.3977	37.0031	38.1817	39.0424	37.7043	36.9426	54.2174	50.6806	50.5238	55.068	54.1051	46.6973	0.465517	5.48635	31.9742	1.56232e-08	7.53849e-06	74840	Manf
Rplp1|2410042H16Rik|Arpp1|C430017H15Rik|-|9|9 B|protein-coding	87.985	108.807	85.5334	110.471	105.981	103.619	137.442	152.697	129.843	180.449	142.155	142.958	0.556632	6.95547	32.0079	1.53547e-08	7.53849e-06	56040	Rplp1
Fgl2|AI385601|musfiblp|-|5 A3|5 9.83 cM|protein-coding	8.16799	2.90739	8.58015	7.27328	5.08372	8.40969	2.14144	1.47375	3.08255	2.01468	3.67141	2.38861	-1.44803	2.27435	31.3513	2.15313e-08	9.84959e-06	14190	Fgl2
Tomm7|1110020J08Rik|AW047273|Tom7|-|5|5 A3|protein-coding	18.1989	25.9903	20.0025	24.29	20.0525	22.6461	34.3604	31.8494	33.8329	46.875	32.5274	30.6936	0.681869	4.83537	31.3254	2.18207e-08	9.84959e-06	66169	Tomm7
Mrc2|Endo180|mKIAA0709|uPARAP|-|11|11 E1|protein-coding	15.1179	7.31253	9.06278	10.7727	8.89651	15.618	5.3536	5.15812	5.11253	3.96221	6.95636	3.88149	-1.13739	3.05179	31.139	2.40199e-08	1.01852e-05	17534	Mrc2
Mrgprf|BC019711|Mgrc|MrgF|-|7|7 F5|protein-coding	3.22421	1.40964	2.03779	3.22494	1.76518	1.74201	0.292015	0.655	0.827027	0.940186	0.966162	0.597153	-1.60851	0.716073	31.1721	2.3614e-08	1.01852e-05	211577	Mrgprf
Rps21|1810049N11Rik|2410030A14Rik|-|2|2 H4|protein-coding	41.4848	65.2841	48.9069	50.0895	39.3988	57.2459	81.4721	90.7174	74.8835	123.836	71.4316	73.9275	0.772213	6.09423	30.2678	3.76316e-08	1.54876e-05	66481	Rps21
Col1a2|AA960264|AI325291|Col1a-2|Cola-2|Cola2|oim|-|6 A1|6 1.81 cM|protein-coding	45.5688	12.2463	28.1	32.0436	24.7125	37.1228	7.68972	11.4625	9.5484	9.87195	20.9335	7.64355	-1.41892	4.38145	29.7483	4.91944e-08	1.96679e-05	12843	Col1a2
Pln|Plb|-|10|10 B3|protein-coding	4.084	2.11447	5.63072	4.87172	3.81279	5.28609	1.65475	1.6375	1.4285	1.00734	2.70525	1.25402	-1.41884	1.66316	29.3284	6.10921e-08	2.36225e-05	18821	Pln
Fbln1|-|-|15|15 E2|protein-coding	22.4978	9.07458	18.2864	19.4183	17.3694	22.8864	7.20303	7.85999	9.62359	10.1406	11.9804	8.00185	-0.99737	3.80031	29.2855	6.24621e-08	2.36225e-05	14114	Fbln1
Cabp1|caldendrin|-|5|5 F|protein-coding	40.4101	45.7253	42.9008	52.9028	50.343	47.9953	64.2432	74.5062	63.1548	77.6996	58.5494	65.3285	0.525608	5.83527	28.5209	9.26937e-08	3.41332e-05	29867	Cabp1
Olig2|AI604895|Bhlhb1|Olg-2|Oligo2|RK17|bHLHe19|-|16 C3.3|16 52.6 cM|protein-coding	24.6473	30.836	22.5765	20.6534	26.0541	25.7096	39.9087	42.3293	38.0432	39.0177	32.141	33.3211	0.579778	4.97023	28.1085	1.14702e-07	4.11545e-05	50913	Olig2
Gjb2|AI325222|Cnx26|Cx26|Gjb-2|-|14 C3|14 30.1 cM|protein-coding	21.4947	7.31253	17.1067	18.046	8.89651	19.3423	4.18554	6.8775	3.98477	4.16368	10.2413	5.31466	-1.40412	3.43791	28.0401	1.18826e-07	4.15683e-05	14619	Gjb2
Prkg1|AW125416|CGKI|Gm19690|Prkg1b|Prkgr1b|-|19|19 C1|protein-coding	32.7436	31.5408	27.671	26.0054	28.5253	30.9356	20.733	15.2287	21.7283	13.9685	21.7708	20.0643	-0.643636	4.60867	27.8067	1.34061e-07	4.5754e-05	19091	Prkg1
Sphk1|1110006G24Rik|Sk1|Spk1|-|11|11 E2|protein-coding	2.93761	1.14534	2.19866	1.85263	2.33004	4.14477	0.681367	0.736874	0.827027	1.14165	0.966162	0.656868	-1.53812	0.865557	27.7201	1.40201e-07	4.67105e-05	20698	Sphk1
Col3a1|AW550625|Col3a-1|Tsk-2|Tsk2|-|1 C1.1|1 23.67 cM|protein-coding	13.2551	2.29067	9.54542	11.3216	5.50736	10.6923	1.94676	2.53812	3.15774	1.81322	4.57317	1.43317	-1.76397	2.56552	27.6322	1.46719e-07	4.7745e-05	12825	Col3a1
Gpr182|AM-R|Admr|G10-D|Gpcr17|Gpcr22|MB10|NOW|-|10 D3|10 75.07 cM|protein-coding	4.94378	0.881027	3.21756	3.84249	2.04761	3.96457	0.681367	0.818749	0.977395	0.402937	1.41704	1.07487	-1.79892	1.15413	27.4913	1.57802e-07	5.01847e-05	11536	Gpr182
Fam180a|B230314O19|-|6|6 B1|protein-coding	2.72266	0.792925	2.8958	2.53879	1.69457	2.76318	1.2654	0.49125	0.52629	0.87303	0.83734	0.358292	-1.6592	0.732708	27.4349	1.62469e-07	5.05208e-05	208164	Fam180a
Mpzl2|Eva|Eva1|-|9 A5.2|9 24.84 cM|protein-coding	3.22421	0.528616	2.25229	2.6074	1.55336	4.14477	0.194676	0.409375	0.451106	0.738717	1.03057	0.656868	-1.99388	0.758617	27.208	1.82699e-07	5.55761e-05	14012	Mpzl2
Cp|D3Ertd555e|-|3|3 A2|protein-coding	34.1766	13.744	26.9738	25.6623	22.4531	30.9957	10.9019	16.2931	11.3528	8.46167	17.713	11.1668	-1.0221	4.27686	27.1141	1.91796e-07	5.71021e-05	12870	Cp
Ndufa1|1810049F12Rik|MWFE|-|X|X A3.3|protein-coding	17.9123	21.1447	19.7343	22.0943	19.2052	20.5437	27.352	27.2644	25.5627	38.4133	30.2087	30.3354	0.572969	4.65059	26.5079	2.62468e-07	7.49534e-05	54405	Ndufa1
Tmed2|1110032D12Rik|1810020N21Rik|Rnp24|Sid394|p24beta1|-|5|5 F|protein-coding	4.15564	6.96012	4.29008	3.84249	4.09522	5.70657	9.34447	8.51499	7.21769	14.3043	9.46838	8.599	0.990805	2.87136	26.5228	2.60452e-07	7.49534e-05	56334	Tmed2
Itih2|AI747202|Intin2|Itih-2|-|2 A1|2 6.89 cM|protein-coding	11.2489	2.11447	8.41927	7.34189	4.8719	9.85135	1.75209	2.2925	2.70663	1.6789	3.99347	1.9706	-1.60285	2.35017	26.4062	2.76644e-07	7.74217e-05	16425	Itih2
Unc5d|D930029E11Rik|Unc5h4|mKIAA1777|-|8|8 A2|protein-coding	53.9517	53.4784	55.1275	45.904	54.5794	62.9525	39.714	39.5456	40.9754	32.4364	40.8364	39.9495	-0.482686	5.548	25.7279	3.93102e-07	0.000103868	210801	Unc5d
Cped1|6720481P07|A430107O13Rik|AI552584|-|6|6 A3.1|protein-coding	10.6757	4.49324	12.5485	7.8222	8.11983	9.43086	3.21216	3.35687	2.63145	1.74606	6.63431	2.80662	-1.37976	2.66981	25.7264	3.93411e-07	0.000103868	214642	Cped1
Mylk|9530072E15Rik|A930019C19Rik|AW489456|KRP|MLCK108|MLCK210|Mlck|nmMlck|smMLCK|-|16|16 B3|protein-coding	52.4471	36.8269	59.0422	48.3055	45.5417	59.889	33.095	27.7556	38.9455	31.2276	36.6497	30.8131	-0.607623	5.38959	25.7305	3.92565e-07	0.000103868	107589	Mylk
Rev3l|Rev|Rev3|Sez4|-|10|10 B1|protein-coding	77.6676	78.059	78.562	63.2638	76.9619	73.2844	58.2082	43.885	59.17	45.5319	56.8747	54.2215	-0.494457	5.99917	25.6693	4.05221e-07	0.000103955	19714	Rev3l
Fn1|E330027I09|Fn|Fn-1|-|1 C3|1 36.05 cM|protein-coding	142.367	83.169	128.541	112.53	94.5431	151.675	81.6668	74.9974	62.1022	66.1488	74.33	87.662	-0.674291	6.59777	25.6533	4.08601e-07	0.000103955	14268	Fn1
Ubald2|1110014K08Rik|D030012E24Rik|Fam100b|-|11|11 E2|protein-coding	2.22112	3.52411	1.71603	2.26432	2.40065	2.70311	5.15893	4.17562	5.2629	5.9769	3.73583	5.0758	1.00106	1.92049	25.3263	4.84057e-07	0.000118832	319370	Ubald2
ENSMUST00000082397.1	52.0172	99.2037	49.4431	47.3449	34.7388	70.9417	85.1709	91.3724	111.949	180.986	141.961	118.654	1.04678	6.49903	25.3483	4.78563e-07	0.000118832	ENSMUST00000082397.1	ENSMUST00000082397.1
Enpp1|4833416E15Rik|AI428932|C76301|CD203c|E-NPP 1|E-NPP1|Ly-41|M6S1|NPP1|Npps|PC-1|Pca|Pca-1|Pdnp1|ttw|twy|-|10 A4|10 12.26 cM|protein-coding	16.4076	10.308	11.2078	10.361	10.8029	13.3354	6.619	7.85999	7.29287	3.49212	7.7937	5.67295	-0.90684	3.23663	25.2143	5.13012e-07	0.000123769	18605	Enpp1
Bcl7b|-|-|5|5 G2|protein-coding	31.5972	33.5671	30.9422	34.7196	32.903	34.1794	42.3421	43.7212	41.8776	49.8299	45.2164	42.6367	0.425921	5.27626	25.1144	5.40268e-07	0.000128135	12054	Bcl7b
Lnpep|2010309L07Rik|4732490P18Rik|CAP|IRAP|PLAP|gp160|vp165|-|17|17 A3.2|protein-coding	52.662	54.1832	46.1183	23.8097	51.2609	37.9037	31.3429	15.3925	23.4575	5.64112	14.2992	12.3611	-1.37861	4.94517	24.9455	5.89726e-07	0.000137534	240028	Lnpep
Cyp1b1|CP1B|P4501b1|-|17|17 E3|protein-coding	12.6102	6.5196	10.2962	10.7727	9.24955	11.3531	4.18554	3.02937	4.2855	3.89506	8.43781	5.0758	-1.06512	2.94385	24.7645	6.47807e-07	0.000148603	13078	Cyp1b1
Foxc2|Fkh14|Hfhbf3|MFH-1|Mfh1|-|8 E1|8 70.33 cM|protein-coding	2.86596	0.440514	2.19866	1.98986	1.12972	3.06353	0.584029	0.245625	0.52629	0.268625	1.03057	0.298576	-1.97685	0.498127	24.6413	6.90559e-07	0.000155855	14234	Foxc2
Nsfl1c|Munc-18c|Stxbp3a|p47|-|2|2 G3|protein-coding	20.7782	26.9594	21.7185	22.4374	24.0771	24.3881	31.9269	30.13	31.8029	40.2265	31.6257	33.5003	0.508567	4.82874	24.6092	7.02175e-07	0.000155961	386649	Nsfl1c
Rpl32|AU020185|rpL32-3A|-|6 E3|6 53.72 cM|protein-coding	23.4292	25.5498	21.9866	27.1032	21.041	23.9075	34.7497	34.2237	33.3818	52.5833	32.2054	32.0671	0.617483	4.92132	24.5275	7.32563e-07	0.000160168	19951	Rpl32
Lama1|AA408497|Lama|-|17 E1.1|17 38.8 cM|protein-coding	12.6102	5.46237	9.00916	6.65573	6.28404	10.0316	4.28288	4.2575	4.13513	2.88771	5.34609	3.10519	-1.0651	2.6696	24.02	9.53398e-07	0.000205245	16772	Lama1
Pfdn2|ESTM27|W48336|-|1 H3|1 79.35 cM|protein-coding	47.8616	46.7826	47.1372	52.0108	42.6468	44.3911	67.2607	65.3362	64.9592	79.7143	56.7459	57.6252	0.479265	5.81116	23.8984	1.01554e-06	0.000215311	18637	Pfdn2
Slit2|Drad-1|E030015M03Rik|E130320P19Rik|Slil3|mKIAA4141|slit-2|-|5|5 B3|protein-coding	60.4001	54.2713	59.5248	57.9804	59.5219	57.1859	43.0235	29.475	42.1784	33.6452	44.2502	48.3097	-0.533548	5.62424	23.7944	1.07194e-06	0.000223876	20563	Slit2
Smoc1|2600002F22Rik|AI848508|SRG|-|12|12 D1|protein-coding	20.7066	20.4398	21.6113	21.2023	18.1461	23.7874	15.6715	11.8719	14.9617	14.7072	15.523	14.3914	-0.532172	4.16359	23.6713	1.14275e-06	0.000235155	64075	Smoc1
Nek10|Gm282|-|14|14 A1-A2|protein-coding	2.22112	3.0836	1.76966	1.09785	2.04761	2.04235	0.584029	0.736874	0.827027	0.335781	1.35263	0.597153	-1.43265	0.614972	23.4748	1.2656e-06	0.00025666	674895	Nek10
Serping1|C1INH|C1nh|-|2|2 D|protein-coding	18.0556	6.87201	15.0689	15.5758	8.89651	14.8371	3.69885	4.2575	7.06732	6.51415	9.40397	4.95637	-1.13838	3.29971	23.3704	1.33618e-06	0.000260743	12258	Serping1
Kcna3|Kca1-3|Kv1.3|Mk-3|-|3 F2.3|3 46.59 cM|protein-coding	5.80357	5.99099	4.39733	6.03819	7.06072	6.18713	3.3095	3.84812	3.30811	1.20881	2.51202	3.10519	-1.04312	2.1807	23.3626	1.34164e-06	0.000260743	16491	Kcna3
Rpl39|2810465O16Rik|-|X|X A3.3|protein-coding	21.9963	40.7035	21.5576	22.5746	16.4515	31.8367	50.0318	51.4993	45.3361	69.238	38.0668	35.9486	0.904557	5.21568	23.3632	1.34118e-06	0.000260743	67248	Rpl39
Siglec1|Cd169|Siglec-1|Sn|-|2 F1|2 63.26 cM|protein-coding	3.86905	1.67395	1.93053	1.7154	1.69457	1.80208	0.194676	1.06437	0.300737	0.537249	1.35263	0.537437	-1.62895	0.634602	23.2578	1.41676e-06	0.000271572	20612	Siglec1
Col1a1|Col1a-1|Cola-1|Cola1|Mov-13|Mov13|-|11 59.01 cM|11 D|protein-coding	29.5911	13.0392	18.4473	23.8097	19.6994	24.9888	9.83116	9.98874	12.1799	9.20039	18.2283	8.95729	-0.920705	4.06224	22.6948	1.89877e-06	0.000359047	12842	Col1a1
Serpind1|AA985900|AI303446|HC-II|HCII|Hcf2|-|16 A3|16 10.74 cM|protein-coding	5.80357	2.64308	4.66546	5.42065	3.24793	5.4663	1.75209	2.12875	2.4059	1.47743	2.9629	1.85117	-1.11487	1.81125	22.5042	2.09686e-06	0.000386833	15160	Serpind1
Unc5c|B130051O18Rik|Unc5h3|rcm|-|3 H1|3 65.57 cM|protein-coding	97.8009	86.2526	95.3469	79.1827	97.2968	79.7719	63.3672	39.5456	65.1096	48.4867	63.8955	73.9275	-0.595447	6.21614	22.5004	2.101e-06	0.000386833	22253	Unc5c
Gstm1|Gstb-1|Gstb1|-|3|3 F2.3|protein-coding	115.427	123.08	106.072	128.312	112.548	115.453	155.449	152.287	138.79	193.41	154.844	146.959	0.426682	7.09806	22.3154	2.31339e-06	0.000420407	14862	Gstm1
Arl3|-|-|19|19 C3|protein-coding	47.7183	54.0951	53.8404	57.8431	50.4136	53.4616	65.3139	75.2431	69.6958	82.8035	64.5396	67.2394	0.420799	5.95365	22.1398	2.53503e-06	0.000454778	56350	Arl3
Calcrl|AV071593|CRLR|-|2|2 D|protein-coding	17.8406	12.5106	16.5168	12.4881	12.7093	14.717	8.85778	10.3162	10.0747	6.17836	10.4345	7.8227	-0.6976	3.57013	21.9827	2.7512e-06	0.000481219	54598	Calcrl
Acer2|2410116I05Rik|Asah3l|CRG-L1|maCER2|-|4|4 C4|protein-coding	10.9623	11.0128	10.2962	13.5173	13.3448	12.8548	6.91101	9.98874	6.31548	6.17836	8.05135	8.00185	-0.663119	3.31416	21.9977	2.72973e-06	0.000481219	230379	Acer2
Mgp|Mglap|-|6|6 G1|protein-coding	11.5355	3.2598	14.3718	13.9976	8.19044	13.6357	3.01748	3.43875	3.15774	3.96221	7.92253	3.28434	-1.38701	2.95595	21.8937	2.88177e-06	0.000497834	17313	Mgp
Shfm1|DSS1|Shfdg1|Shfg|-|6|6 A1|protein-coding	25.5071	30.6598	28.1536	28.4756	23.3004	30.5752	37.1832	40.61	37.141	50.5686	35.748	35.5306	0.506823	5.07646	21.8231	2.98976e-06	0.000510191	20422	Shfm1
Tagln|Sm22|Sm22a|Ws310|-|9 A5.2|9 25.36 cM|protein-coding	13.5417	5.02186	24.2389	20.4475	10.8029	19.2822	4.18554	6.55	6.6914	5.5068	10.1125	4.2995	-1.3212	3.48405	21.7747	3.06616e-06	0.000516924	21345	Tagln
Adora2a|A2AAR|A2aR|AA2AR|-|10|10 C1|protein-coding	1.07474	1.93826	1.28702	1.85263	1.55336	3.1236	1.55741	163.177	13.6835	3.42496	2.06115	1.67203	4.09177	4.01378	21.6457	3.27936e-06	0.000546287	11540	Adora2a
Ubc|2700054O04Rik|AI194771|Rps27a|TI-225|Uba52|Ubb|-|5 G1.1|5 64.18 cM|protein-coding	74.3717	109.159	74.0038	86.1129	75.1967	88.6621	116.611	106.192	111.348	152.646	115.295	123.67	0.517454	6.68488	21.5546	3.43888e-06	0.00056612	22190	Ubc
Id2|AI255428|C78922|Idb2|bHLHb26|-|12 A1.3|12 8.57 cM|protein-coding	70.8609	64.4912	71.6443	78.9082	63.5465	66.3765	85.4629	108.157	83.7553	110.338	88.5648	89.0355	0.442781	6.35563	21.5315	3.48073e-06	0.000566347	15902	Id2
Cfh|Mud-1|NOM|Sas-1|Sas1|-|1 61.62 cM|1 F|protein-coding	49.2229	18.9421	37.2164	32.5239	26.8308	39.105	14.9901	22.1062	16.3902	13.5655	26.6661	14.6302	-0.912224	4.71389	21.4157	3.69738e-06	0.000587926	12628	Cfh
Atp5g3|6030447M23|-|2|2 C3|protein-coding	117.361	168.452	129.131	147.936	132.812	164.89	189.907	182.09	203.825	263.722	193.683	191.268	0.509263	7.44193	21.4333	3.66344e-06	0.000587926	228033	Atp5g3
C2|-|-|17 B1|17 18.41 cM|protein-coding	3.6541	0.440514	3.32481	2.81325	1.977	3.72429	0.194676	0.736874	0.150369	0.335781	1.41704	0.955444	-2.03084	0.899928	21.2293	4.07484e-06	0.00061311	12263	C2
Zfp871|4732483N19|9030612M13Rik|AI118577|AI265322|mKIAA3006|-|17|17 B1|protein-coding	193.381	191.712	177.716	153.562	185.556	165.25	146.397	129.362	141.271	88.5789	129.079	121.461	-0.497555	7.24862	21.2903	3.94714e-06	0.00061311	208292	Zfp871
Trip11|2610511G22Rik|3110031G15Rik|6030460N08Rik|AI450776|GMAP-210|TRIP230|-|12|12 E|protein-coding	40.4101	40.4392	40.9166	27.6522	42.8586	35.3207	29.3961	24.5625	23.5327	12.5582	25.6999	23.1098	-0.715031	4.9391	21.2696	3.99006e-06	0.00061311	109181	Trip11
Slc7a11|9930009M05Rik|AI451155|sut|xCT|-|3 C|3 21.72 cM|protein-coding	99.8788	45.9896	72.824	54.8927	58.4628	77.7295	44.7756	40.9375	42.9302	26.7281	50.3048	30.2159	-0.798108	5.75478	21.23	4.07335e-06	0.00061311	26570	Slc7a11
Zdhhc14|B530001K09Rik|New1cp|-|17|17 A1|protein-coding	40.9116	43.5228	39.3078	42.336	42.1525	41.8082	56.4562	57.3943	61.2	58.493	50.8201	47.5931	0.408304	5.60295	21.2465	4.03848e-06	0.00061311	224454	Zdhhc14
Sema3d|4631426B19Rik|-|5|5 A1|protein-coding	15.2612	10.8366	13.5137	11.253	9.32016	13.035	9.73382	6.79562	7.74398	6.5813	7.27842	8.18099	-0.668133	3.33982	21.1276	4.297e-06	0.000639659	108151	Sema3d
Cd74|CLIP|DHLAG|HLADG|Ia-GAMMA|Ii|-|18 E1|18 34.41 cM|protein-coding	9.74427	3.70031	9.97442	7.41051	5.01311	6.60761	2.72547	3.11125	1.95479	2.95487	5.34609	2.14975	-1.21734	2.40078	21.0938	4.3735e-06	0.000644193	16149	Cd74
Cox7a2|COX7AL|Cox7a3|CoxVIIa-L|-|9 E1|9 43.82 cM|protein-coding	55.9579	65.6365	69.7673	75.2029	62.558	68.2987	84.2949	88.0156	84.9582	114.434	84.7646	87.0051	0.451494	6.29544	21.0414	4.49463e-06	0.000655139	12866	Cox7a2
Rc3h1|5730557L09Rik|Gm551|N28103|mKIAA2025|-|1|1 H2.1|protein-coding	86.9819	87.5741	88.161	80.6922	82.9635	86.3194	71.9329	58.6225	70.6732	48.2181	66.0855	63.1788	-0.438079	6.2178	20.8552	4.95342e-06	0.000714569	381305	Rc3h1
Bgn|BG|DSPG1|PG-S1|PGI|SLRR1A|-|X A7.3|X 37.33 cM|protein-coding	42.2729	18.1492	49.3895	37.0525	32.2675	41.5078	20.733	17.7669	18.0442	17.3263	30.4663	17.198	-0.861593	4.84632	20.7547	5.22031e-06	0.000745386	12111	Bgn
Sod1|B430204E11Rik|Cu/Zn-SOD|CuZnSOD|Ipo-1|Ipo1|SODC|Sod-1|-|16 C3.3|16 51.56 cM|protein-coding	50.7275	60.3504	50.5693	63.6069	52.7436	54.3025	67.9421	79.5006	69.6958	98.4509	71.1095	72.1958	0.467014	6.04561	20.6149	5.61588e-06	0.000793768	20655	Sod1
Olig1|AI836478|AW494459|Bhlhb6|Olg-1|Oligo1|bHLHe21|-|16|16 C3.3|protein-coding	95.5082	103.961	75.9343	96.7483	99.4856	97.0117	125.956	128.134	122.926	136.394	118.645	118.296	0.400897	6.78159	20.4525	6.11286e-06	0.00084869	50914	Olig1
Sf3b4|SF3b49|SF3b50|Sap49|-|3|3 F2.1|protein-coding	9.88757	11.1009	8.52652	10.1551	8.68469	10.5722	15.3794	12.6087	14.1346	17.3934	14.6212	12.7791	0.563585	3.61615	20.4485	6.12576e-06	0.00084869	107701	Sf3b4
Zic2|HPE5|Ku|-|14 E5|14 65.97 cM|protein-coding	28.9462	34.4482	27.5637	23.1921	21.747	24.9888	14.0167	16.5387	18.9464	15.4459	23.4455	13.1971	-0.659645	4.46106	20.4241	6.20445e-06	0.000851166	22772	Zic2
Ptpn4|PTPMEG|Ptn4|TEP|TEP/mPTPMEG|hPTP-MEG|-|1 E2.3|1 52.39 cM|protein-coding	35.7529	42.025	34.6424	24.4958	35.6567	32.4974	25.3079	22.8431	21.4275	7.38717	15.2654	16.78	-0.914736	4.71601	20.3936	6.30417e-06	0.000856449	19258	Ptpn4
Lyz2|AI326280|Lys|Lysm|Lyzf2|Lyzs|Lzm|Lzm-s1|Lzp|-|10 D2|10 65.34 cM|protein-coding	12.4669	5.02186	9.43817	9.88068	6.07222	7.9892	5.06159	4.09375	4.36069	3.76074	5.73256	3.04548	-0.9717	2.72118	20.3657	6.39653e-06	0.00086064	17105	Lyz2
Spp1|2AR|Apl-1|BNSP|BSPI|Bsp|ETA-1|Eta|OP|Opn|Opnl|Ric|Spp-1|-|5 E5|5 50.68 cM|protein-coding	8.88448	3.78842	8.90191	8.57698	4.80129	8.58989	3.01748	5.40375	3.08255	3.42496	3.607	2.50804	-1.05768	2.48182	20.3452	6.46551e-06	0.000861637	20750	Spp1
2010107E04Rik|9430003J03Rik|AU043134|AV124504|Mp68|-|12|12 F1|protein-coding	46.142	52.5973	43.7051	52.2166	41.5877	52.08	64.1459	70.5762	64.1322	101.473	62.6073	59.9541	0.553267	5.89205	20.3143	6.57093e-06	0.000867425	70257	2010107E04Rik
BC018473|-|-|11|11 E2|ncRNA	1.64793	1.40964	1.60878	1.64678	1.34154	1.44166	0.973382	0.573125	1.05258	0.335781	0.579697	0.597153	-1.17713	0.31661	20.2832	6.6785e-06	0.000873386	193217	BC018473
Usp9x|5730589N07Rik|AA407302|AA407699|AL022658|AL022749|Dffrx|FAF-X|Fafl|-|X A1.1|X 7.95 cM|protein-coding	215.879	221.578	211.072	158.297	225.731	191.501	168.687	121.339	151.496	71.4541	127.855	132.269	-0.663406	7.37989	20.2122	6.93107e-06	0.000898023	22284	Usp9x
Myof|2310004N10Rik|2310051D19Rik|E030042N20Rik|Fer1l3|-|19|19 C2|protein-coding	17.0525	8.89838	16.3023	12.5567	15.5336	16.8794	7.78706	6.46812	9.02211	7.38717	12.1736	8.18099	-0.773046	3.55311	20.1913	7.00695e-06	0.000899525	226101	Myof
Bmp5|AU023399|se|-|9 D|9 42.34 cM|protein-coding	4.80049	2.37877	3.1103	3.56802	3.24793	4.56526	1.07072	1.22812	2.33071	1.74606	2.3832	1.49288	-1.06453	1.50731	20.1522	7.15192e-06	0.00090979	12160	Bmp5
BC005561|-|-|5|5 E5|protein-coding	14.9747	12.9511	14.05	9.33175	13.0623	12.0739	8.85778	10.5619	7.74398	4.49946	7.1496	5.97153	-0.780387	3.35597	20.0794	7.42916e-06	0.000936543	100042165	BC005561
Rps27l|1810034D23Rik|-|9|9 C|protein-coding	5.44533	5.55047	5.04084	5.35203	5.71919	4.62533	10.6099	8.43312	7.06732	9.73764	8.18017	7.0464	0.683259	2.80559	19.8958	8.178e-06	0.00102174	67941	Rps27l
Cbr3|1110001J05Rik|C81353|-|16 C4|16 54.58 cM|protein-coding	6.52006	6.6077	5.5771	6.99881	6.91951	6.54754	11.3886	13.0181	9.77395	10.0063	8.43781	8.65871	0.640866	3.07981	19.7668	8.74873e-06	0.00108337	109857	Cbr3
Anpep|AP-M|AP-N|Apn|Cd13|P150|-|7|7 D2|protein-coding	7.95304	4.14083	5.7916	6.79297	5.93101	6.66768	2.72547	4.42125	2.93219	3.49212	4.25111	3.10519	-0.83148	2.33045	19.6543	9.2795e-06	0.00112911	16790	Anpep
Penk|AI326464|ENK|PPA|Penk1|-|4 A1|4 2.31 cM|protein-coding	13.685	14.8013	11.476	14.821	12.8505	19.8829	19.273	611.033	63.8314	25.385	14.3636	14.0928	3.09449	6.117	19.6689	9.20869e-06	0.00112911	18619	Penk
Cox6c|-|-|15|15 B3.1|protein-coding	50.8708	65.9008	61.6698	59.5585	43.8471	55.2637	75.7291	85.5593	75.0339	111.613	70.5298	70.6432	0.537207	6.10783	19.5622	9.73776e-06	0.00117466	12864	Cox6c
Anxa1|Anx-1|Anx-A1|C430014K04Rik|Lpc-1|Lpc1|-|19 B|19 13.83 cM|protein-coding	2.43607	1.49775	2.46679	2.81325	2.47125	2.88332	0.973382	1.39187	0.751843	1.41028	1.41704	1.31374	-0.998077	0.995963	19.495	1.00866e-05	0.00120165	16952	Anxa1
Tbx18|2810012F10Rik|2810404D13Rik|-|9 E3.1|9 47.06 cM|protein-coding	6.73501	3.0836	6.16698	5.90096	5.29554	8.16941	2.14144	3.35687	2.63145	2.28331	4.44434	2.68719	-1.00906	2.20733	19.4861	1.01332e-05	0.00120165	76365	Tbx18
Ndnf|A930038C07Rik|epidermacan|-|6|6 C1|protein-coding	25.1488	26.5189	23.3809	20.5161	23.0886	22.3457	17.2289	13.5912	20.826	14.1699	17.3265	14.4511	-0.530566	4.32361	19.2989	1.11771e-05	0.00129352	68169	Ndnf
Slc13a4|9630060C05Rik|SUT-1|SUT1|-|6|6 B1|protein-coding	42.7028	11.7177	38.4498	30.0537	35.3036	38.204	4.96425	5.15812	6.91695	5.03671	30.5951	6.50896	-1.72738	4.43454	19.3222	1.10415e-05	0.00129352	243755	Slc13a4
Lmod1|9530015K06Rik|SM-Lmod|-|1|1 E4|protein-coding	2.72266	0.96913	4.93359	4.66588	2.40065	3.60415	0.486691	0.982499	1.20295	1.34312	1.93232	1.01516	-1.45478	1.27299	19.2975	1.11853e-05	0.00129352	93689	Lmod1
Bmp7|OP1|-|2 H3|2 95.54 cM|protein-coding	25.2205	11.0128	20.8605	18.1146	15.5336	26.2502	8.27375	15.2287	8.64619	7.72296	13.9127	7.94213	-0.924529	3.91776	19.2716	1.1338e-05	0.00130043	12162	Bmp7
Scn7a|1110034K09Rik|AI642000|NaG|Nav2|Nav2.3|Nax|Scn6a|-|2 C1.3|2 39.21 cM|protein-coding	12.3236	7.66494	10.6716	8.92006	12.2151	11.7736	5.54828	5.81312	8.87174	5.43965	7.1496	5.97153	-0.713192	3.12352	19.2036	1.17494e-05	0.00132629	20272	Scn7a
Fbln5|A55|DANCE|EVEC|-|12|12 E|protein-coding	8.95613	2.99549	11.905	11.3216	8.33165	10.7524	3.89353	4.01187	3.8344	3.08918	6.37667	3.94121	-1.11126	2.77877	19.203	1.1753e-05	0.00132629	23876	Fbln5
Bex3|AL033356|DXWsu67e|Gcap27|Nade|Ngfrap1|-|X F1|X 57.64 cM|protein-coding	105.897	134.092	109.343	135.448	114.596	128.248	140.459	149.258	166.458	220.272	164.892	163.799	0.466961	7.17528	19.1431	1.21273e-05	0.00135757	12070	Bex3
Fibin|1110018M03Rik|-|2|2 E3|protein-coding	5.80357	1.85016	4.5582	4.52864	2.75368	6.00692	2.14144	2.04687	1.50369	1.88037	2.51202	1.31374	-1.17194	1.70896	18.9376	1.35064e-05	0.0014538	67606	Fibin
Oaz1|AZ-1|AZ1|Antizyme|ODC-Az|Oaz|-|10 C1|10 39.72 cM|protein-coding	14.4731	22.4662	16.9994	16.6736	13.839	20.844	25.9893	30.0481	25.5627	35.5256	23.4455	21.6169	0.623815	4.48467	18.9508	1.34135e-05	0.0014538	18245	Oaz1
Cox6b1|2010000G05Rik|Cox6b|-|7 B1|7 18.84 cM|protein-coding	73.9418	81.495	80.8143	95.3074	83.952	76.408	100.648	103.736	101.273	144.453	107.759	109.936	0.4417	6.59666	18.9882	1.31531e-05	0.0014538	110323	Cox6b1
Ncam2|Ncam-2|Ocam|RNCAM|-|16 C3.3|16 45.89 cM|protein-coding	69.213	67.5748	62.5278	53.7262	67.3593	66.6768	39.0326	50.435	46.5391	22.363	42.3823	49.0262	-0.631847	5.73413	18.9807	1.32044e-05	0.0014538	17968	Ncam2
ENSMUST00000082393.1	37.759	132.33	38.0744	36.9153	29.5138	70.7615	101.232	86.7056	125.407	197.036	167.082	155.499	1.2712	6.61921	18.946	1.34472e-05	0.0014538	ENSMUST00000082393.1	ENSMUST00000082393.1
Phldb2|AV253284|C820004H04Rik|LL5b|LL5beta|-|16|16 B5|protein-coding	14.9747	8.89838	16.8385	12.4881	14.1214	14.4767	9.14979	7.69624	7.14251	7.18571	11.6584	7.76298	-0.697187	3.48999	18.8043	1.44839e-05	0.00154712	208177	Phldb2
Palld|2410003B16Rik|6030492A02|-|8|8 B3.1|protein-coding	13.7566	8.98648	16.7313	14.821	12.9211	16.9996	10.3179	7.36874	8.79656	8.05874	10.5634	8.30042	-0.664283	3.54473	18.7863	1.46217e-05	0.00155001	72333	Palld
Cdk5r2|B230310J22Rik|p39|-|1|1 C4|protein-coding	185.571	205.72	162.218	213.121	191.487	191.981	256.389	305.721	242.62	257.544	230.14	233.128	0.407625	7.8013	18.7633	1.47989e-05	0.001557	12570	Cdk5r2
Usp34|A530081C03Rik|Murr2|-|11 A3.2|11 14.29 cM|protein-coding	194.384	187.835	195.627	151.229	191.063	172.158	154.768	131	143.376	108.323	136.809	144.212	-0.416732	7.3163	18.7222	1.51211e-05	0.00157903	17847	Usp34
Cubn|AA408369|AL022750|D2Wsu88e|-|2 A1|2 9.86 cM|protein-coding	2.14947	1.32154	2.19866	1.23508	1.12972	1.14131	1.36273	0.0818749	0.375921	0.335781	0.193232	0.776298	-1.59327	0.235549	18.689	1.53866e-05	0.00159485	65969	Cubn
Mrvi1|BB115629|Irag|Ris1|-|7 E3|7 57.9 cM|protein-coding	6.37676	4.22893	7.77576	4.73449	4.23643	7.14823	1.55741	3.76625	2.55627	2.21615	4.31552	2.50804	-1.024	2.16955	18.6447	1.57488e-05	0.00162039	17540	Mrvi1
AA465934|-|-|11 C|11|ncRNA	0.931438	0.792925	0.643511	0.686158	0.847287	0.540623	1.2654	1.47375	1.65405	2.149	1.09498	1.91089	1.1258	0.376192	18.6032	1.60948e-05	0.0016439	613254	AA465934
Uqcr11|0710008D09Rik|AL022707|Uqcr|-|10|10 C1|protein-coding	29.5911	37.3556	33.5162	39.8658	38.1279	38.0238	49.3505	46.505	48.1179	68.1635	43.6061	48.1305	0.489852	5.44247	18.5325	1.6703e-05	0.0016852	66594	Uqcr11
Trim71|2610206G21Rik|AL022943|Gm1127|Lin41|lin-41|mLin41|mlin-41|-|9|9 F3|protein-coding	1.79123	1.32154	1.4479	1.23508	1.69457	1.20138	0.292015	0.409375	1.12776	0.402937	0.772929	0.656868	-1.2028	0.24496	18.5283	1.674e-05	0.0016852	636931	Trim71
Col24a1|5430404K19Rik|-|3|3 H2|protein-coding	0.501543	1.05723	1.60878	1.50955	0.917894	0.961107	3.60151	21.6969	1.57887	1.61175	1.99673	3.5232	2.35805	1.75892	18.4714	1.72469e-05	0.00172383	71355	Col24a1
Nid1|A630025O17|Nid|entactin|entactin-1|nidogen-1|-|13 A1|13 5.26 cM|protein-coding	21.2081	9.7794	17.2139	13.2429	13.6978	17.4801	9.24713	10.1525	8.64619	4.29799	10.8854	8.30042	-0.850038	3.60957	18.4241	1.7681e-05	0.00175468	18073	Nid1
Hr|ALUNC|AU|N|ba|bldy|hr|rh|rh-bmh|rhino|-|14|14 D2|protein-coding	10.0309	11.982	10.1353	9.88068	11.0853	8.95031	15.2821	25.4631	14.3602	12.4239	16.3603	14.7497	0.668337	3.75211	18.3575	1.83096e-05	0.00180427	15460	Hr
Hs3st3b1|3-OST-3B|3OST3B1|3Ost3b|AU041882|AW536289|Hs3st3b|m3-OST-3B|-|11 B3|11 39.47 cM|protein-coding	1.79123	0.96913	2.57405	2.12709	1.9064	2.82325	0.389353	1.55562	0.751843	0.537249	1.15939	0.656868	-1.27772	0.697337	18.3091	1.87807e-05	0.00183775	54710	Hs3st3b1
Cxx1b|Mart8c|-|X|X A5|protein-coding	18.5571	24.4045	18.7691	22.506	18.9227	22.4659	32.803	36.5162	27.2919	36.8687	23.8964	25.6178	0.542081	4.68931	18.273	1.91402e-05	0.00185992	553127	Cxx1b
Bmp4|Bmp-4|Bmp2b|Bmp2b-1|Bmp2b1|-|14 C1|14 23.95 cM|protein-coding	4.72884	2.20257	4.87996	3.9111	3.03611	4.38505	1.46007	2.37437	1.80442	1.74606	2.76966	1.43317	-1.00187	1.62631	18.1565	2.03471e-05	0.00196357	12159	Bmp4
Wnt5a|8030457G12Rik|Wnt-5a|-|14 A3|14 16.8 cM|protein-coding	20.9932	17.973	19.5735	19.9672	16.3103	20.1232	12.2646	7.94187	12.7061	12.8268	14.0416	16.1231	-0.59351	4.00856	18.1167	2.0777e-05	0.00199132	22418	Wnt5a
F13a1|1200014I03Rik|AI462306|F13a|-|13|13 A3.3|protein-coding	6.23347	2.20257	4.71908	4.04833	4.30704	3.96457	1.16806	2.21062	2.10516	1.94753	3.15613	1.25402	-1.09861	1.72256	18.0163	2.19025e-05	0.00207083	74145	F13a1
1700020I14Rik|1190006L01Rik|4933437I03Rik|AI451541|AI585852|AW538376|AW558897|Cyrano|-|2|2 E5|ncRNA	95.0066	102.816	90.3597	66.0084	94.6843	86.9201	73.2957	53.71	61.2	22.9674	49.3387	54.8186	-0.765833	6.15067	18.0285	2.1762e-05	0.00207083	66602	1700020I14Rik
Ndufa2|AV000592|B8|C1-B8|CI-B8|-|18|18 B2|protein-coding	28.8029	34.4482	29.7624	32.5239	26.7601	30.5752	40.006	44.3762	35.4118	56.4112	41.545	37.0235	0.479684	5.19331	17.9306	2.29102e-05	0.00213722	17991	Ndufa2
Slc35d3|6230421J19Rik|Frcl1|-|10|10 A3|protein-coding	0.573192	0.528616	0.697137	0.617542	0.564858	1.38159	0.973382	30.785	2.70663	1.00734	1.2238	1.31374	3.09981	1.80328	17.942	2.27738e-05	0.00213722	76157	Slc35d3
Slc16a12|3230401A21|AW210596|-|19|19 C1|protein-coding	6.44841	2.99549	5.84523	4.66588	6.8489	6.18713	2.14144	2.78375	2.25553	1.61175	4.37993	3.10519	-1.0127	2.10713	17.8992	2.32923e-05	0.00215847	240638	Slc16a12
Alpk1|8430410J10Rik|LAK|-|3|3 G2|protein-coding	9.24273	7.66494	8.52652	5.76373	7.48437	8.89024	6.42432	4.09375	4.2855	5.03671	5.34609	4.00092	-0.713424	2.71169	17.8484	2.39217e-05	0.00218384	71481	Alpk1
Ptprg|5430405N12Rik|AW046354|AW549872|RPTPgamma|-|14 A1|14 6.33 cM|protein-coding	149.46	149.158	152.727	143.956	152.37	154.198	132.867	88.0974	128.415	96.772	114.522	117.818	-0.411052	7.04273	17.841	2.40147e-05	0.00218384	19270	Ptprg
Ost4|2310016E02Rik|-|5|5 B1|protein-coding	7.4515	7.75304	7.40038	8.57698	7.48437	8.28955	10.4152	13.1	10.3754	13.2969	9.40397	11.9431	0.545847	3.28529	17.8395	2.40342e-05	0.00218384	67695	Ost4
Tpt1|TCTP|Trt|p21|p23|-|14 D3|14 40.29 cM|protein-coding	6.16182	7.22442	5.7916	5.07757	5.71919	6.2472	9.05245	9.49749	8.1199	9.60333	9.21074	8.36014	0.575646	2.92911	17.7815	2.47782e-05	0.00223691	22070	Tpt1
Adarb2|Adar3|RED2|-|13|13 A1|protein-coding	36.0395	39.5581	36.0366	24.6331	36.9276	33.879	22.1931	13.4275	29.0963	14.0356	24.154	24.4833	-0.699479	4.80915	17.5794	2.75552e-05	0.00247166	94191	Adarb2
Tgfbr3|1110036H20Rik|AU015626|AW215636|TBRIII|-|5|5 E5|protein-coding	53.1636	28.6334	53.5723	38.8366	49.1426	51.1189	27.6441	19.9775	30.3744	21.6914	41.6738	27.1704	-0.703706	5.21511	17.5603	2.7834e-05	0.00248077	21814	Tgfbr3
Mmp16|MT-MMP 3|MT3-MMP|Mt3mmp|-|4 A3|4 7.08 cM|protein-coding	28.0148	25.3736	19.6807	17.0853	23.7946	19.3423	14.3087	12.9362	18.8713	10.745	15.4586	14.8691	-0.609683	4.21014	17.5145	2.8513e-05	0.00252521	17389	Mmp16
Thbd|AI385582|CD141|TM|-|2 G3|2 73.45 cM|protein-coding	17.1241	7.75304	13.2456	14.2721	9.03773	18.201	7.10569	11.135	6.54103	6.24552	7.27842	6.03124	-0.851179	3.39567	17.4935	2.8829e-05	0.00253713	21824	Thbd
Ahnak|DY6|-|19|19 A|protein-coding	57.2476	33.5671	49.7649	42.5418	46.3183	54.663	30.7589	41.6743	31.427	22.0944	35.0395	28.0065	-0.590363	5.30769	17.4361	2.97126e-05	0.00259855	66395	Ahnak
Gp1bb|-|-|16 A3|16 11.53 cM|protein-coding	99.019	134.709	83.1738	117.059	115.584	118.937	133.159	183.4	144.655	193.074	140.738	146.243	0.494578	7.06876	17.4143	3.00558e-05	0.00261224	14724	Gp1bb
Bmx|Etk|Etk/Bmx|Tyro8|-|X|X F5|protein-coding	1.86288	1.14534	2.19866	1.57816	0.988501	2.22256	0.194676	0.900624	0.601474	1.00734	0.772929	0.836014	-1.18547	0.460032	17.2359	3.30142e-05	0.00285165	12169	Bmx
Ankrd12|2900001A12Rik|AI447928|ANCO-2|AV347965|GAC-1|mKIAA0874|-|17|17 E1.1|protein-coding	100.237	92.596	102.533	83.2996	97.9322	95.9305	79.6227	72.0499	81.3494	53.2548	70.2722	73.5692	-0.413845	6.38722	17.2184	3.33189e-05	0.00286032	106585	Ankrd12
Cldn5|AI854493|MBEC1|Tmvcf|-|16 A3|16 11.63 cM|protein-coding	24.289	17.8849	19.3053	24.29	21.6764	28.9533	31.9269	32.2587	29.8482	38.0775	30.7884	29.1411	0.491296	4.78137	17.1981	3.36776e-05	0.00287348	12741	Cldn5
Ube3a|4732496B02|5830462N02Rik|A130086L21Rik|Hpve6a|mKIAA4216|-|7 B5|7 33.95 cM|protein-coding	90.4927	83.7857	83.442	65.3223	91.1539	74.9063	63.0752	48.3881	62.1022	23.7733	55.7797	51.6537	-0.683164	6.05082	17.1865	3.38842e-05	0.00287359	22215	Ube3a
Gpr88|AW061286|Strg|-|3|3 G1|protein-coding	2.57937	11.6296	5.14809	6.65573	3.53036	9.19059	5.06159	499.847	43.3813	11.6852	4.25111	9.01701	3.88602	5.66519	17.1533	3.44802e-05	0.00290652	64378	Gpr88
Ndufb4|0610006N12Rik|1300010H20Rik|-|16|16 B3|protein-coding	6.52006	10.3961	7.07862	7.75359	6.21344	8.46976	12.946	10.3162	12.8565	15.3788	9.91926	10.5696	0.635865	3.31685	17.133	3.48511e-05	0.00290802	68194	Ndufb4
Islr|AW553146|Meflin|-|9|9 B|protein-coding	33.9616	14.7132	25.1506	22.6432	18.8521	25.4093	8.46842	9.98874	15.112	16.1846	18.4859	12.5999	-0.796295	4.22508	17.1296	3.49137e-05	0.00290802	26968	Islr
Slc26a2|Dtd|ST-OB|-|18|18 E1|protein-coding	8.88448	7.84114	6.54236	5.42065	8.68469	8.83017	5.06159	4.2575	6.24029	2.7534	4.50875	3.76206	-0.802434	2.63349	17.0824	3.57923e-05	0.00296356	13521	Slc26a2
Jund|Jund1|-|8 B3.3|8 34.15 cM|protein-coding	80.6052	99.7323	71.3225	103.747	100.403	97.6725	115.638	136.649	118.114	142.505	111.817	120.207	0.429303	6.75901	17.0139	3.71078e-05	0.0030392	16478	Jund
Ackr1|AA162249|CCBP1|CD234|Darc|Dfy|ESTM35|FY|GPD|-|1 H3|1 80.33 cM|protein-coding	25.3638	28.8096	24.7216	27.1032	29.3726	26.6107	36.0151	37.7443	34.3592	41.5025	30.8528	33.3808	0.401527	4.97393	17.0122	3.71403e-05	0.0030392	13349	Ackr1
Lrp1b|9630004P12Rik|LRP-DIT|-|2|2 B|protein-coding	60.0419	55.0642	56.3072	40.9636	57.1213	49.5571	39.2273	33.8962	48.569	24.5791	36.1989	36.6055	-0.543096	5.49155	16.9992	3.73951e-05	0.00304226	94217	Lrp1b
Scai|9330112M16|A930041I02Rik|AI662729|-|2|2 B|protein-coding	120.084	122.639	122.75	99.5616	120.032	108.665	96.0728	78.1906	97.2884	59.9704	83.8628	92.4989	-0.450288	6.64786	16.9844	3.76886e-05	0.00304842	320271	Scai
Xdh|XO|Xor|Xox-1|Xox1|-|17 E2|17 45.25 cM|protein-coding	14.7597	9.07458	13.2992	12.8312	13.5566	14.8371	8.76044	12.2812	6.46585	7.58864	7.66488	7.22555	-0.657464	3.44132	16.9536	3.83045e-05	0.00308043	22436	Xdh
Rfx3|C230093O12Rik|MRFX3|-|19|19 C1|protein-coding	172.889	160.699	151.172	122.822	169.74	150.113	85.1709	99.9693	141.196	97.5779	134.103	97.8136	-0.499193	7.04558	16.9084	3.92272e-05	0.0031366	19726	Rfx3
Scn4b|Gm1471|-|9|9 A5.2|protein-coding	22.2829	22.2019	20.0561	21.7512	20.6879	23.3068	29.7855	464.886	59.6211	23.3032	25.5067	32.9628	2.28687	5.99353	16.8251	4.09886e-05	0.00325882	399548	Scn4b
Zc3hav1l|B130055L09Rik|E430016P22Rik|-|6|6 B1|protein-coding	14.903	15.8585	14.2645	12.9684	14.8275	16.3989	11.8753	9.66124	13.0069	8.7303	10.3701	8.83786	-0.518775	3.67577	16.7671	4.22599e-05	0.00333363	209032	Zc3hav1l
Zfp607a|4732475C15Rik|Zfp607|-|7|7 A3|protein-coding	1.21803	1.32154	1.55515	1.16647	1.55336	1.08125	0.681367	0.49125	0.225553	0.738717	0.644108	0.776298	-1.12363	0.149232	16.7605	4.24059e-05	0.00333363	545938	Zfp607a
Hspa5|AL022860|AU019543|Bip|D2Wsu141e|D2Wsu17e|Grp78|Hsce70|SEZ-7|Sez7|baffled|mBiP|-|2 B|2 22.94 cM|protein-coding	200.331	188.804	206.782	231.578	217.4	190.419	275.856	297.452	239.537	264.797	277.482	236.532	0.365307	7.88077	16.7356	4.29682e-05	0.00335896	14828	Hspa5
Lpp|9430020K16Rik|AA959454|AU024130|B130055L10Rik|C79715|D630048H16|-|16|16 B1|protein-coding	19.7751	17.0919	18.3401	15.4386	17.5812	20.3034	15.3794	13.0181	13.3076	10.4764	13.6551	11.6445	-0.492782	3.96795	16.7082	4.35927e-05	0.00338885	210126	Lpp
Plcxd3|B130016O10Rik|-|15|15 A1|protein-coding	8.66953	11.6296	10.0281	7.54774	12.3563	11.4131	6.32698	7.45062	7.14251	2.88771	5.73256	6.32982	-0.78418	3.04789	16.6939	4.39216e-05	0.00339556	239318	Plcxd3
Rasal2|6530401P13|A330066M24Rik|-|1|1 G3-H1|protein-coding	167.157	164.488	152.941	121.038	160.773	144.526	119.629	116.754	131.723	87.4373	109.756	115.31	-0.420692	7.05272	16.6521	4.48996e-05	0.00339611	226525	Rasal2
Atrx|4833408C14Rik|AI447451|ATR2|DXHXS6677E|HP1-BP38|Hp1bp2|Hp1bp38|MRXS3|RAD54L|Rad54|XH2|Xnp|ZNF-HX|-|X D|X 47.26 cM|protein-coding	295.767	273.118	285.505	227.736	270.214	260.04	227.382	200.43	222.997	155.332	203.023	206.555	-0.407713	7.88153	16.6616	4.46755e-05	0.00339611	22589	Atrx
Ssbp4|1210002E11Rik|AW743380|Sspb4|-|8|8 B3.3|protein-coding	75.0165	100.966	66.9252	88.8575	88.5415	88.7823	110.187	108.894	118.265	124.978	107.566	103.845	0.405441	6.62452	16.6676	4.45361e-05	0.00339611	76900	Ssbp4
Ogn|3110079A16Rik|OG|OIF|SLRR3A|mimecan|mimican|-|13|13 A5|protein-coding	32.0271	13.2154	28.7971	27.0346	18.2167	28.4728	2.82281	2.37437	11.5032	11.1479	17.4553	10.3905	-1.40251	4.10941	16.6535	4.4867e-05	0.00339611	18295	Ogn
Dmxl2|6330586A12|6430411K14Rik|E130119P06Rik|mKIAA0856|-|9|9 A5.3|protein-coding	352.227	354.79	338.272	259.299	337.644	312.9	271.866	196.827	273.821	177.292	238.835	249.371	-0.473692	8.13136	16.6354	4.5297e-05	0.00340775	235380	Dmxl2
1810037I17Rik|5730414I01Rik|-|3|3 G1|protein-coding	16.336	17.0919	18.3401	19.2124	15.9572	18.4412	21.9984	24.8081	23.0816	30.556	22.0285	22.0946	0.455341	4.38975	16.5623	4.7078e-05	0.00352279	67704	1810037I17Rik
Dok3|AI450713|Dokl|-|13|13 B1|protein-coding	4.65719	5.10996	4.98721	5.90096	6.49587	6.2472	11.4859	10.0706	8.57101	8.79745	8.43781	6.21039	0.670799	2.8736	16.4959	4.87545e-05	0.00362884	27261	Dok3
Dnajb14|5730496F10Rik|-|3|3 G3|protein-coding	29.3045	29.162	26.5985	15.9189	29.4432	23.4871	23.4585	12.1994	15.5631	6.37983	11.916	14.8094	-0.871975	4.31943	16.4779	4.92203e-05	0.00364413	70604	Dnajb14
Kdm5a|AA409370|C76986|Jarid1a|RBP2|Rbbp2|-|6 F1|6 56.95 cM|protein-coding	69.2846	69.3369	67.8368	58.049	64.1114	57.6664	50.2265	51.3356	52.7794	39.8907	51.4642	50.6385	-0.382348	5.83361	16.3338	5.31075e-05	0.00391122	214899	Kdm5a
Ptar1|1700084D09Rik|2010013L17Rik|4930428J16Rik|AI449677|-|19|19 B|protein-coding	7.09326	6.3434	6.22061	2.26432	6.35465	5.28609	4.67223	1.55562	3.23292	0.805874	1.67468	1.37345	-1.35251	2.0106	16.3044	5.39386e-05	0.00395164	72351	Ptar1
Rem2|AW411893|-|14|14 C2|protein-coding	13.8283	15.5061	15.6051	15.713	17.9342	15.8583	22.2905	27.1825	22.4801	20.6169	18.9368	19.2283	0.46519	4.23761	16.2258	5.6222e-05	0.00409747	140743	Rem2
Oprm1|M-OR-1|MOP-R|MOR-1|MOR-1O|Oprm|mor|muOR|-|10 A1|10 1.85 cM|protein-coding	1.71958	1.58585	1.87691	1.23508	1.55336	1.32152	0.973382	1.39187	0.751843	0.201468	0.450875	0.418007	-1.20699	0.332753	16.1826	5.75196e-05	0.00417032	18390	Oprm1
Adamtsl1|5930437A14Rik|6720426B09Rik|ADAMTSL-1|-|4|4 C4|protein-coding	13.2551	17.8849	16.9994	12.2822	17.3694	12.9149	8.76044	6.71375	9.84914	8.39452	12.9466	11.4653	-0.633908	3.65274	16.1492	5.85426e-05	0.00422261	77739	Adamtsl1
Syndig1l|DSPC1|Gm261|Tmem90a|-|12|12 D1|protein-coding	5.30203	6.69581	4.1292	5.14619	6.28404	6.90796	4.96425	171.528	17.2924	7.79011	6.89195	5.8521	2.63471	4.36277	16.1185	5.95012e-05	0.00426974	627191	Syndig1l
Pantr1|2610017I09Rik|Pou3f3os|linc-Brn1a|-|1|1 B|ncRNA	21.4231	19.8231	21.3431	22.9177	18.4285	18.261	33.5817	25.7906	21.7283	34.6526	26.6661	28.2453	0.480642	4.61573	16.0349	6.2186e-05	0.0044171	66297	Pantr1
Fgd4|9030023J02Rik|9330209B17Rik|Frabp|ZFYVE6|-|16|16 A3|protein-coding	70.2877	66.077	73.8965	59.4899	71.1015	72.3834	55.9695	37.0893	56.5386	38.2118	53.783	57.1475	-0.468325	5.89485	16.0361	6.21464e-05	0.0044171	224014	Fgd4
Ubxn7|A630090P18|AI196514|Ubxd7|mKIAA0794|-|16|16 B3|protein-coding	79.8887	76.3851	82.4767	67.3807	84.6581	78.0899	67.4554	60.5875	64.5833	48.8225	60.4817	62.1039	-0.36654	6.12012	16.0131	6.2907e-05	0.00444574	224111	Ubxn7
Eif3f|0610037M02Rik|AA409853|Eif3s5|-|7|7 E3|protein-coding	87.4118	95.4153	90.7351	103.061	88.8239	94.5489	114.275	118.064	110.07	137.67	111.624	115.489	0.336993	6.7242	15.9771	6.41126e-05	0.00450818	66085	Eif3f
Ppp1r1b|AU040756|DARPP-32|Darpp32|-|11|11 D|protein-coding	40.0518	38.5009	41.2383	38.6993	49.3545	46.9741	46.041	881.138	110.746	58.0229	59.902	41.2633	2.23166	6.91706	15.9527	6.49452e-05	0.00454389	19049	Ppp1r1b
Rpl37a|-|-|1|1 C3|protein-coding	8.38294	11.4534	8.31202	9.5376	7.90801	9.551	12.4593	12.8544	12.4806	21.7586	12.8822	12.4208	0.627204	3.55933	15.8269	6.94082e-05	0.00473869	19981	Rpl37a
Cckbr|CCK-BR|CCK2-R|CCK2R|CCKR-2|-|7 E3|7 55.86 cM|protein-coding	9.67262	11.7177	10.5107	11.4588	9.46137	9.91142	14.4061	29.7206	13.0821	15.3116	12.0448	19.7658	0.733505	3.80912	15.836	6.90765e-05	0.00473869	12426	Cckbr
Pank3|-|-|11|11 A4|protein-coding	111.773	111.802	121.463	99.9732	110.924	106.322	90.4272	81.5474	87.5145	60.2391	92.6871	88.7369	-0.402576	6.60149	15.8247	6.94898e-05	0.00473869	211347	Pank3
N4bp2l2|2700092H06Rik|zag1|-|5|5 G3|protein-coding	60.6867	62.9935	61.509	51.8736	57.8979	54.3025	46.7223	47.7331	43.9828	35.1898	48.4369	45.6822	-0.383678	5.68821	15.8173	6.97613e-05	0.00473869	381695	N4bp2l2
Cox6a1|VIaL|-|5 F|5 56.06 cM|protein-coding	132.766	150.568	136.532	163.237	135.848	146.989	177.837	196.172	176.984	232.226	164.634	175.205	0.375263	7.37391	15.8495	6.85855e-05	0.00473869	12861	Cox6a1
Fam208b|AI645998|Pap20|mKIAA2006|-|13|13 A1|protein-coding	48.4348	43.0822	44.8849	40.3461	44.4826	45.0519	34.7497	38.645	34.5096	22.6316	34.4598	31.8282	-0.438146	5.27564	15.8446	6.87634e-05	0.00473869	105203	Fam208b
Eea1|A430109M19Rik|B230358H09Rik|ZFYVE2|-|10|10 C2|protein-coding	98.2308	93.9175	96.1513	84.3288	96.1671	92.2663	79.6227	70.9037	79.6201	57.0827	77.0997	72.3152	-0.362499	6.38002	15.7272	7.31644e-05	0.00490825	216238	Eea1
Col4a6|BB116301|-|X|X F1-F2|protein-coding	4.94378	2.99549	2.94943	2.81325	2.11822	3.48401	1.84943	1.39187	1.65405	1.34312	2.44761	1.19431	-0.965246	1.37014	15.7401	7.26669e-05	0.00490825	94216	Col4a6
Thbs2|TSP2|Thbs-2|-|17 A2|17 8.95 cM|protein-coding	16.336	9.25079	14.1036	11.1158	9.46137	14.1763	5.84029	6.95937	9.62359	5.03671	10.0481	7.34498	-0.729774	3.34274	15.7234	7.33098e-05	0.00490825	21826	Thbs2
Kcnma1|5730414M22Rik|BKCa|MaxiK|Slo|Slo1|mSlo|mSlo1|-|14|14 A3|protein-coding	84.1876	91.4506	81.9404	51.256	87.0587	73.1643	73.101	44.0487	54.2079	22.7659	39.0973	43.6519	-0.762098	5.96027	15.7142	7.36685e-05	0.00490878	16531	Kcnma1
Gmps|670032|AA591640|AI047208|Gm9479|-|3|3 E1|protein-coding	51.3007	56.1214	56.4145	49.6779	57.1213	50.9987	45.8463	31.44	45.6369	26.1909	39.0329	42.3978	-0.481256	5.52859	15.7008	7.41925e-05	0.00492027	229363	Gmps
Hcar1|Gpr81|-|5|5 F|protein-coding	3.36751	0.704822	2.78855	2.26432	1.34154	3.06353	0.584029	1.6375	0.52629	1.00734	0.901751	0.776298	-1.32186	0.822826	15.6232	7.72994e-05	0.00510212	243270	Hcar1
Car11|Ca11|-|7|7 B3|protein-coding	94.7917	100.79	89.3408	105.188	95.9552	99.4145	129.947	239.157	121.197	154.325	116.841	112.205	0.577173	6.92684	15.5907	7.86424e-05	0.0051664	12348	Car11
Stx4a|Stx4|Syn-4|Syn4|-|7|7 F3|protein-coding	28.0864	28.8096	28.8508	31.7005	28.5959	29.494	35.7231	47.2418	34.5848	45.8676	37.165	32.724	0.409689	5.09545	15.58	7.90881e-05	0.0051714	20909	Stx4a
Atp5j2|1110019H14Rik|-|5|5 G2|protein-coding	25.8653	27.5762	28.1	30.1223	24.0065	28.3527	36.0151	35.7793	32.2541	55.8067	34.7174	35.3514	0.487655	5.04285	15.4954	8.27058e-05	0.00535788	57423	Atp5j2
Arfgef3|9630004D11|B930094H20Rik|BIG3|D10Bwg1379e|mKIAA1244|-|10 A3|10 7.79 cM|protein-coding	51.1574	47.4874	41.721	28.75	45.6829	40.3665	39.422	21.4512	30.2241	13.1626	24.0896	25.7373	-0.729911	5.09656	15.5032	8.23667e-05	0.00535788	215821	Arfgef3
ENSMUST00000082391.1	33.8183	82.0236	38.8788	26.074	23.371	46.4335	69.6942	57.4762	68.944	100.264	86.246	78.5256	0.881452	5.89256	15.4661	8.39975e-05	0.00541648	ENSMUST00000082391.1	ENSMUST00000082391.1
Cald1|4833423D12Rik|AI195384|AV071549|AW536160|C920027I18Rik|-|6 B1|6 15.07 cM|protein-coding	72.0073	52.9497	72.7704	58.8038	63.4053	66.7969	42.3421	38.3993	52.4786	46.1363	60.0308	43.7116	-0.449688	5.80781	15.4007	8.69579e-05	0.00552011	109624	Cald1
Tenm1|Odz1|Odz2|TCAP-1|Ten-m1|ten-1|-|X|X A4|protein-coding	14.7597	13.8321	12.5485	9.26314	14.8981	13.9361	8.17641	8.76062	11.3528	3.08918	6.11902	7.28526	-0.827	3.38854	15.4059	8.6719e-05	0.00552011	23963	Tenm1
Myl9|AI327049|MLC20|Mylc2c|RLC-C|-|2|2 H1|protein-coding	19.5602	9.07458	28.3145	23.8783	18.9227	22.4659	11.7779	11.8719	9.69877	13.4984	15.2654	9.73359	-0.769372	4.03702	15.3958	8.718e-05	0.00552011	98932	Myl9
Map3k2|9630061B06Rik|AI585793|Mekk2|Mekk2b|-|18|18 B1|protein-coding	60.7584	56.7382	60.1683	50.1582	57.1213	57.6664	41.6608	52.2362	47.5165	29.8845	41.9958	38.6358	-0.445198	5.63491	15.3873	8.7577e-05	0.00552011	26405	Map3k2
Lrrc8c|AD158|AI326115|E430036I04Rik|fad158|-|5|5 E5|protein-coding	17.4107	18.0611	18.93	14.9582	19.77	17.8405	14.0167	15.065	13.8339	10.0063	11.916	12.0028	-0.482874	3.95033	15.3932	8.72998e-05	0.00552011	100604	Lrrc8c
Dcp2|2410015D23Rik|5730537H01Rik|AL118268|-|18|18 B3|protein-coding	90.636	101.142	97.7601	87.5538	104.004	93.6479	81.7641	65.8275	77.2142	62.1866	82.0593	78.5256	-0.360735	6.41518	15.3729	8.82433e-05	0.00553717	70640	Dcp2
Xrn1|Dhm2|exo|mXrn1|-|9|9 E3.3|protein-coding	69.4279	66.9581	70.0355	55.373	68.5596	65.2952	53.3413	51.745	57.9671	35.7942	48.3081	48.4291	-0.422047	5.85165	15.3612	8.87945e-05	0.00554688	24127	Xrn1
Phip|2810004D21Rik|4632404O06Rik|Ndrp|Wdr11|-|9|9 E2|protein-coding	101.598	90.4815	91.7004	81.5156	93.7664	87.9413	75.8265	78.9274	71.8762	47.3451	68.4043	66.9408	-0.419511	6.31883	15.3519	8.92298e-05	0.0055493	83946	Phip
Cdk12|1810022J16Rik|AI646528|Crk7|Crkrs|D11Ertd752e|Pksc|-|11 D|11 61.75 cM|protein-coding	48.2198	45.1967	48.1561	37.3956	49.3545	47.6349	32.1216	31.7675	40.5243	26.9296	39.2262	35.1723	-0.423012	5.33305	15.3323	9.01612e-05	0.00558242	69131	Cdk12
Dmxl1|C630007L23Rik|D030030C22|-|18|18 D1|protein-coding	97.2278	96.913	103.391	80.6922	105.981	95.7503	83.0295	71.9681	79.545	52.2475	71.3671	76.7341	-0.416287	6.40456	15.3072	9.13687e-05	0.00563225	240283	Dmxl1
Srrm3|2900083I11Rik|AB041661|SRm300-like|Srrm2l|-|5|5 G2|protein-coding	43.491	52.333	40.0586	47.0018	49.2839	49.6772	58.4029	64.845	59.4708	59.9704	55.2645	61.9844	0.35431	5.74395	15.2864	9.23772e-05	0.00566945	58212	Srrm3
Hdac5|AI426555|Hdac4|mHDA1|mKIAA0600|-|11|11 D|protein-coding	123.308	147.22	122.321	134.967	148.911	144.707	185.429	183.318	162.022	178.165	160.705	163.978	0.331436	7.27323	15.2603	9.36651e-05	0.005719	15184	Hdac5
Snrpf|2010013O18Rik|SMF|sm-F|snRNP-F|-|10|10 C2|protein-coding	3.58245	5.55047	2.78855	3.43079	1.55336	3.96457	5.54828	5.48562	6.24029	9.46901	6.69872	5.4938	0.910758	2.3497	15.2448	9.44344e-05	0.005719	69878	Snrpf
Cemip|12H19.01.T7|6330404C01Rik|9930013L23Rik|AY007814|Kiaa1199|-|7 D3|7 48.35 cM|protein-coding	38.4039	31.9813	29.387	26.7602	36.2215	32.3773	17.6182	11.79	24.9612	20.4826	27.761	24.4235	-0.614816	4.75681	15.2437	9.44911e-05	0.005719	80982	Cemip
Ranbp2|A430087B05Rik|AI256741|NUP358|-|10 B4|10 29.34 cM|protein-coding	178.693	174.62	178.789	149.171	185.273	170.176	147.662	130.099	150.068	91.4667	135.52	123.431	-0.414347	7.24208	15.2372	9.48194e-05	0.005719	19386	Ranbp2
Dnah5|AU022615|Dnahc5|Mdnah5|b2b1134Clo|b2b1154Clo|b2b1537Clo|b2b1565Clo|b2b601Clo|mKIAA1603|-|15 B1|15 10.9 cM|protein-coding	12.3236	11.0128	8.31202	7.61636	9.17894	9.37079	6.13231	4.50312	7.59361	6.37983	6.50549	6.2701	-0.621239	3.014	15.1743	9.80263e-05	0.00586189	110082	Dnah5
Lmcd1|AW455500|AW553074|dyxin|-|6|6 E3|protein-coding	6.16182	5.55047	5.5771	6.17542	6.70769	6.78782	10.0258	8.76062	8.04472	11.618	8.30899	8.12128	0.566386	2.95796	15.1758	9.79511e-05	0.00586189	30937	Lmcd1
Trappc2l|1810017G16Rik|AB030200|Hspc176|Tca17|-|8|8 E1|protein-coding	34.0333	38.1485	33.9988	36.7095	32.7618	33.5787	40.882	41.265	48.0427	51.3744	41.9314	43.1741	0.352289	5.31417	15.1588	9.88387e-05	0.00588532	59005	Trappc2l
ENSMUST00000082419.1	70.0011	49.9542	54.4303	56.608	51.1196	56.2248	80.4987	66.5643	78.4924	79.6472	80.7067	60.4916	0.398977	6.03363	15.1388	9.98871e-05	0.00592254	ENSMUST00000082419.1	mt-Nd6
Rgs9|RGS9-1|Rgs9-2|-|11 E1|11 71.86 cM|protein-coding	12.7535	10.6604	12.0122	7.8222	13.4154	12.7347	9.83116	383.666	34.9607	10.0734	12.1092	9.31558	2.72734	5.45677	15.1054	0.00010167	0.00600282	19739	Rgs9
Aspn|4631401G09Rik|AA986886|Plap1|Slrr1c|-|13|13 A5|protein-coding	3.43915	1.67395	3.48569	4.04833	3.17733	3.18367	1.36273	1.80125	1.4285	1.88037	2.44761	1.25402	-0.901377	1.38542	15.0202	0.000106365	0.00625363	66695	Aspn
Col25a1|2700062B08Rik|CLAC-P|-|3|3 G3|protein-coding	165.008	184.399	168.654	147.798	156.466	161.706	124.009	77.2899	144.504	101.943	134.49	130.12	-0.465628	7.14493	14.9994	0.000107547	0.00629665	77018	Col25a1
Rictor|4921505C17Rik|6030405M08Rik|AVO3|AW492497|D530039E11Rik|-|15|15 A1|protein-coding	101.168	100.085	101.031	81.7901	96.6613	93.0472	74.1717	80.6468	77.6653	50.0985	74.0724	75.4204	-0.409692	6.39175	14.99	0.00010808	0.00630149	78757	Rictor
Sntb2|Snt2|-|8 D3|8 53.38 cM|protein-coding	22.7127	18.3254	19.1981	12.0078	21.6764	19.3423	14.2114	10.8894	11.7287	4.63377	14.3636	9.67387	-0.793007	3.91102	14.9303	0.000111557	0.00645456	20650	Sntb2
Txnip|1200008J08Rik|AA682105|Hyplip1|THIF|Tbp-2|VDUP1|-|3 F2.1|3 41.93 cM|protein-coding	41.9147	26.6951	33.1945	30.2596	28.5253	33.0381	22.4851	27.1006	21.6531	20.0797	27.8255	19.2283	-0.486571	4.79872	14.9252	0.000111861	0.00645456	56338	Txnip
Taok1|2810468K05Rik|AU020252|D130018F14Rik|Map3k16|Markk|Psk2|mKIAA1361|-|11|11 B5|protein-coding	292.256	280.872	301.7	235.97	292.385	262.262	243.151	198.219	232.395	148.281	208.304	211.989	-0.423212	7.92158	14.9213	0.000112089	0.00645456	216965	Taok1
Ndufa12|2410011G03Rik|AW112974|-|10|10 C2|protein-coding	9.45767	10.8366	8.04389	13.1742	11.2266	10.9927	14.3087	11.5444	14.6609	19.0723	17.3909	16.1231	0.552928	3.72314	14.8256	0.000117926	0.00676151	66414	Ndufa12
Bfsp2|AI448593|CP49|-|9|9 F1|protein-coding	2.43607	4.05273	2.41317	2.88186	2.8949	3.1236	4.86691	7.12312	4.96216	4.70093	4.25111	4.00092	0.750936	2.02289	14.8182	0.000118386	0.00676151	107993	Bfsp2
Zfp292|5730450D02Rik|5830493J20Rik|9430062L07Rik|AI449016|Krox-10|Zfp-15|Zfp15|Zn-15|Zn-16|mKIAA0530|-|4 A5|4 16.86 cM|protein-coding	72.4372	74.5349	70.1964	58.8038	70.7485	64.9949	54.9961	58.3768	55.1101	41.5025	54.878	53.3854	-0.371824	5.92998	14.8077	0.000119048	0.00677172	30046	Zfp292
Rpl13|A52|L13|-|8|8 E1|protein-coding	10.0309	31.5408	13.0311	10.7041	8.33165	20.3635	30.9536	27.7556	26.54	53.3891	27.6322	24.0055	1.01972	4.57033	14.7721	0.000121314	0.00679758	270106	Rpl13
Rpl19|-|-|11|11 D|protein-coding	0.286596	1.58585	0.750763	0.82339	0.917894	0.72083	1.65475	1.22812	1.80442	2.21615	1.67468	1.61231	1.03698	0.479579	14.7723	0.000121307	0.00679758	19921	Rpl19
Uqcrh|2210416J04Rik|2310021J10Rik|2610041P16Rik|-|4|4 D1|protein-coding	54.3816	69.0725	62.6887	68.6158	58.4628	62.2917	76.4105	90.3899	72.1769	114.434	75.3606	77.5104	0.431658	6.20178	14.7701	0.000121446	0.00679758	66576	Uqcrh
Lepr|LEPROT|Leprb|Modb1|OB-RGRP|Obr|db|diabetes|obese-like|obl|-|4 C6|4 46.96 cM|protein-coding	10.1742	2.90739	9.7063	6.44989	9.46137	7.44858	1.94676	2.86562	3.23292	2.61909	7.34283	2.09003	-1.19307	2.5255	14.7728	0.000121274	0.00679758	16847	Lepr
Flnc|1110055E19Rik|ABP-280|ABPL|Fln2|-|6 A3.3|6 12.36 cM|protein-coding	7.80975	5.72668	6.43511	4.80311	7.41376	7.14823	4.86691	3.19312	4.13513	2.55193	5.34609	3.28434	-0.756055	2.42818	14.7252	0.00012437	0.00693352	68794	Flnc
Stx1a|HPC-1|-|5|5 G2|protein-coding	65.6305	77.6185	67.9441	82.6821	70.0424	81.8142	93.3473	130.427	91.3489	92.6755	86.1816	96.3804	0.405056	6.43372	14.6843	0.000127102	0.00701924	20907	Stx1a
Pik3c2a|Cpk-m|PI3KC2|-|7 F1|7 61.62 cM|protein-coding	50.5126	45.9896	49.2286	46.5215	46.8832	45.2321	39.2273	41.1831	35.6373	25.5865	37.1006	37.322	-0.398265	5.38704	14.6922	0.00012657	0.00701924	18704	Pik3c2a
Smtn|smsmo|-|11|11 A1|protein-coding	9.95922	7.75304	14.5863	11.5961	10.5205	11.7736	6.619	7.77812	6.84177	7.18571	9.01751	6.86726	-0.583645	3.23465	14.6797	0.000127413	0.00701924	29856	Smtn
U2af1|2010107D16Rik|35kDa|-|17|17 B1|protein-coding	5.58863	8.01735	5.5771	5.42065	4.73068	6.2472	9.14979	7.94187	9.24766	13.0283	7.60047	8.53928	0.647523	2.94507	14.5785	0.000134439	0.00737727	108121	U2af1
Cybb|C88302|CGD91-phox|Cgd|Cyd|Nox2|gp91-1|gp91phox|-|X|X A1.1|protein-coding	2.50772	1.58585	1.87691	1.57816	2.04761	1.5618	1.07072	1.39187	1.05258	0.402937	1.09498	0.716583	-0.981679	0.631146	14.5226	0.000138492	0.00756997	13058	Cybb
Zfp800|AA407452|Znf800|-|6|6 A3.2-A3.3|protein-coding	17.1241	15.5942	17.4821	14.3407	14.8981	13.035	10.4152	12.5269	11.3528	8.59599	11.9804	11.5848	-0.476363	3.74435	14.4893	0.000140957	0.00767473	627049	Zfp800
Fnip2|D630023B12Rik|mKIAA1450|-|3|3 E3|protein-coding	31.5972	29.4263	29.7088	24.4958	30.4317	30.9957	21.7064	19.4862	25.6378	19.4081	24.154	23.5278	-0.398209	4.70289	14.4397	0.000144721	0.00781883	329679	Fnip2
Fam135b|1700010C24Rik|A830008O07Rik|-|15|15 D3|protein-coding	24.5756	23.6115	20.3242	10.7041	22.8061	17.9607	18.3969	8.76062	13.3076	3.89506	7.98694	8.18099	-0.992472	3.92004	14.4453	0.00014429	0.00781883	70363	Fam135b
Xbp1|D11Ertd39e|TREB-5|TREB5|XBP-1|-|11 A1|11 3.61 cM|protein-coding	40.3384	42.1131	45.6357	49.0603	49.4251	49.3769	67.4554	68.4475	52.7042	63.7983	57.39	50.6385	0.382773	5.73164	14.4094	0.000147064	0.00791487	22433	Xbp1
Zfp369|B930030B22Rik|D230020H11Rik|NRIF2|-|13|13 B3|protein-coding	21.5664	19.1183	19.2517	10.8413	19.2758	17.6603	14.5034	10.7256	13.7587	4.36515	9.21074	8.89757	-0.814655	3.83014	14.38	0.000149378	0.00800862	170936	Zfp369
Pak3|PAK-3|Pak65alpha|Pak65beta|Stk4|-|X|X F2|protein-coding	174.967	180.611	181.738	164.952	181.672	177.144	143.379	117.9	153.15	125.783	144.473	159.261	-0.329961	7.3121	14.366	0.000150498	0.00803203	18481	Pak3
Aox3|1200011D03Rik|AI326299|Aoh1|Aoh2|-|1 C1.3|1 28.96 cM|protein-coding	6.09017	3.0836	4.66546	3.49941	3.74218	3.48401	2.33612	1.39187	2.25553	1.6789	3.607	1.19431	-0.979397	1.70198	14.3602	0.000150963	0.00803203	71724	Aox3
Tnk2|Ack|Ack-1|Ack1|Cdgip|Pyk1|-|16|16 B3|protein-coding	189.87	213.737	173.319	202.76	212.387	216.009	271.866	312.762	235.176	257.678	228.207	244.056	0.359202	7.84494	14.2138	0.000163169	0.00864855	51789	Tnk2
Ubr1|AI504731|-|2 E5|2 60.37 cM|protein-coding	94.2901	98.0583	95.2933	83.7113	86.5645	85.959	74.7557	71.9681	73.1543	53.4563	75.3606	76.3161	-0.355835	6.3378	14.1884	0.000165388	0.00870927	22222	Ubr1
Tsku|9530051K01Rik|E2ig4|Lrrc54|Tsk|-|7|7 E1|protein-coding	3.6541	2.20257	3.16393	2.6074	2.40065	2.76318	1.46007	2.04687	1.50369	1.88037	1.67468	1.19431	-0.792576	1.2462	14.1864	0.000165559	0.00870927	244152	Tsku
Cdc73|8430414L16Rik|C130030P16Rik|C81219|Hrpt2|-|1 F|1 62.52 cM|protein-coding	44.4941	45.1967	51.9099	39.1796	45.7535	45.6526	38.2539	34.7969	39.3966	25.0492	34.8462	33.5003	-0.405759	5.32143	14.1716	0.000166868	0.00874528	214498	Cdc73
Gm11549|OTTMUSG00000002111|-|3 B|3 17.48 cM|ncRNA	1.14638	1.58585	1.60878	2.95048	1.34154	1.44166	5.45094	20.5506	2.63145	2.7534	1.61027	2.80662	1.81922	1.93037	14.1315	0.000170466	0.00883454	100503068	Gm11549
Lox|AI893619|TSC-160|rrg|-|18 D1|18 28.22 cM|protein-coding	1.57628	0.704822	2.19866	1.64678	1.62397	2.22256	0.292015	0.818749	0.902211	0.537249	1.35263	0.179146	-1.28586	0.436669	14.1325	0.000170376	0.00883454	16948	Lox
Gabra2|C630048P16Rik|Gabra-2|-|5 C3.1|5 37.59 cM|protein-coding	172.101	174.972	173.48	169.412	168.61	175.102	142.016	85.3956	157.21	113.762	134.296	138.42	-0.422696	7.23418	14.1374	0.000169927	0.00883454	14395	Gabra2
Gnb2|Gnb-2|-|5 G2|5 76.54 cM|protein-coding	130.115	155.061	119.586	165.639	147.852	154.378	175.987	203.869	180.217	203.08	167.146	181.594	0.349955	7.37059	14.0236	0.000180535	0.00922181	14693	Gnb2
Mob1b|1110003E08Rik|AU015450|B230364F10|Mobkl1a|-|5|5 E1|protein-coding	20.5633	21.3209	21.3431	17.5656	20.8997	20.4836	15.4768	15.8019	14.8865	8.7303	16.2315	15.2274	-0.50221	4.13146	14.0274	0.00018017	0.00922181	68473	Mob1b
Bicc1|Bic-C|bpk|jcpk|-|10 B5.3|10 36.75 cM|protein-coding	19.0586	10.9247	15.337	13.2429	9.46137	14.4767	8.37109	9.57937	8.57101	7.32002	11.8516	7.88242	-0.624178	3.52648	14.0349	0.000179445	0.00922181	83675	Bicc1
Gabrb1|AW061132|B230208N19Rik|Gabrb-1|-|5 C3.2|5 38.18 cM|protein-coding	23.1426	17.6205	16.195	14.7524	19.6288	16.2788	15.9635	10.7256	13.3076	9.40186	12.3025	12.7791	-0.533511	3.93582	14.0163	0.000181233	0.00922181	14400	Gabrb1
Arhgef19|6030432F23|6430573B13Rik|WGEF|-|4|4 D3|protein-coding	7.7381	8.81027	6.48874	7.34189	9.46137	7.44858	12.0699	12.7725	9.17248	10.745	10.7566	11.1668	0.499123	3.26236	14.0208	0.000180801	0.00922181	213649	Arhgef19
Adam12|Mltna|-|7|7 F3|protein-coding	8.52624	5.81478	8.6874	7.20466	6.63708	6.96803	4.28288	4.66687	5.48845	3.89506	5.92579	4.41893	-0.614237	2.63736	14.0074	0.000182092	0.00923193	11489	Adam12
Vps13a|4930425F11|4930516E05Rik|4930543C13Rik|9930023P20|Chac|Chorein|D330038K10Rik|mKIAA0986|-|19|19 A-B|protein-coding	79.3871	74.1825	76.6851	65.6653	80.9865	73.6448	63.6592	57.3125	63.4555	42.4427	60.0308	60.9693	-0.373963	6.0592	13.9872	0.00018406	0.009298	271564	Vps13a
Ppp1r12c|2410197A17Rik|AI839747|B430101M08|Mbs85|-|7|7 A1|protein-coding	60.6867	76.3851	61.6698	79.4571	74.7025	77.0688	88.9671	101.607	88.943	95.1602	84.7646	86.5871	0.345036	6.34772	13.9789	0.000184872	0.00930544	232807	Ppp1r12c
Casp12|-|-|9 A1|9 2.46 cM|protein-coding	2.43607	0.440514	1.76966	2.33294	1.20032	1.68194	0.389353	0.982499	0.52629	0.940186	0.83734	0.597153	-1.19821	0.435019	13.9336	0.000189386	0.00949847	12364	Casp12
Tmem258|1810006K21Rik|-|19|19 A|protein-coding	11.4638	11.3653	9.75992	12.8312	11.0147	12.0739	15.2821	13.755	15.7887	18.7366	17.6486	13.1374	0.464098	3.77568	13.9185	0.000190913	0.00954085	69038	Tmem258
Zkscan16|XM_143800|Zfp483|-|4|4 B3|protein-coding	39.5503	44.58	36.3048	30.3968	39.6813	36.5821	30.0775	26.3637	27.3671	11.8195	22.8658	29.8576	-0.615046	4.97324	13.8946	0.000193349	0.00962822	100041581	Zkscan16
Cyp26b1|CP26|P450RAI-2|-|6|6 C3|protein-coding	20.7066	11.4534	16.9994	18.6635	19.9112	19.2822	10.8045	10.3162	11.0521	10.6107	16.7468	12.3611	-0.572132	3.91742	13.8723	0.000195666	0.00970906	232174	Cyp26b1
Dusp14|1110014C10Rik|2310042C07Rik|D11Ertd395e|MKP-L|Mkp6|-|11 C|11 51.29 cM|protein-coding	12.8252	15.418	13.8891	17.7715	15.3218	14.5367	19.273	35.6156	19.6231	22.9002	17.8418	18.9297	0.578751	4.22908	13.8411	0.000198939	0.00983658	56405	Dusp14
Foxn2|3230402J05Rik|6030465J18Rik|Fkh19|Foxn1|HTLF|-|17|17 E4|protein-coding	38.7621	36.1221	36.412	32.6611	36.5039	36.2818	25.892	27.5919	32.5548	25.0492	31.7545	26.7524	-0.352817	5.01583	13.8182	0.000201377	0.00984715	14236	Foxn2
Sat1|AA617398|SSAT|Sat|-|X F3|X 72.38 cM|protein-coding	15.5478	14.4488	15.6588	16.7423	14.5451	14.6569	21.3171	24.8081	17.5931	24.9149	18.7435	17.6757	0.446014	4.18315	13.8095	0.000202307	0.00984715	20229	Sat1
Trove2|1810007I17Rik|A530054J02Rik|AI646302|SS-A/Ro|Ssa|Ssa2|-|1 F|1 62.54 cM|protein-coding	94.72	93.2127	100.441	92.6314	92.9897	90.1639	79.5253	72.9506	81.5749	55.068	77.3573	76.6147	-0.349276	6.39381	13.8062	0.000202671	0.00984715	20822	Trove2
Pappa|8430414N03Rik|IGFBP-4ase|PAG1|PAPP-A|-|4 C1|4 34.14 cM|protein-coding	2.72266	3.3479	3.05668	2.88186	3.31854	2.46284	1.46007	0.573125	2.4059	0.87303	2.06115	1.79146	-0.937869	1.26463	13.815	0.000201723	0.00984715	18491	Pappa
Bmpr2|2610024H22Rik|AL117858|AW546137|BB189135|BMP-2|BMPR-2|BMPR-II|BMPRII|BRK-3|Gm20272|-|1|1 C2|protein-coding	347.426	316.906	346.155	285.716	329.948	320.409	282.475	243.905	276.904	189.38	254.68	255.163	-0.37387	8.16777	13.8133	0.000201903	0.00984715	12168	Bmpr2
Trp53inp1|2700057G22Rik|SIP|SIP18|SIP27|Stinp|Teap|-|4|4 A1|protein-coding	23.7158	19.6469	20.3779	15.9875	19.4876	19.6426	15.1848	14.9831	15.8639	12.5582	15.3942	14.3914	-0.42877	4.12263	13.7969	0.000203676	0.00986171	60599	Trp53inp1
Nop10|1110036B12Rik|NOP10P|Nola3|-|2|2 E3|protein-coding	14.903	19.9993	15.9269	18.8693	17.087	20.5437	21.9011	22.1062	22.9312	30.2874	25.1202	22.8112	0.438761	4.40417	13.7113	0.000213163	0.0102855	66181	Nop10
Mrps18c|1110037D14Rik|-|5|5 E4|protein-coding	7.52315	8.63407	7.40038	8.85144	8.68469	7.92913	11.7779	10.5619	11.428	14.8415	10.4345	9.73359	0.490109	3.31174	13.6867	0.000215984	0.0103858	68735	Mrps18c
Nufip2|1110001M19Rik|9530056D24Rik|AI256692|AI461731|PIG1|mKIAA1321|-|11|11 B5|protein-coding	137.495	126.427	143.878	119.048	135.919	126.806	106.293	108.239	116.686	80.6545	110.593	98.2316	-0.34789	6.87867	13.6633	0.000218688	0.0104798	68564	Nufip2
Hspg2|AI852380|Pcn|Plc|per|-|4 D3|4 69.93 cM|protein-coding	31.8838	17.7968	34.3742	20.722	39.7519	31.1158	15.0874	17.8487	14.3602	9.40186	28.7916	14.9885	-0.805747	4.53819	13.6547	0.000219686	0.0104917	15530	Hspg2
Klhl24|1110046J11Rik|4930429H24Rik|6530402O20Rik|C85082|-|16|16 A3|protein-coding	92.7139	90.3053	97.7065	79.1827	93.9076	88.9625	76.4105	72.7868	75.1843	52.4489	73.7503	73.3901	-0.35729	6.3347	13.6441	0.000220929	0.0105152	75785	Klhl24
Tac1|4930528L02Rik|NK-1|NK1|Nkna|PPT-A|PPTA|SP|-|6 A1|6 3.31 cM|protein-coding	5.15873	4.75755	5.7916	7.95943	3.95401	7.0281	4.76957	129.526	15.1872	9.53617	5.34609	5.31466	2.28913	4.08041	13.606	0.000225469	0.0106949	21333	Tac1
Immp1l|1500034J20Rik|2610528O17Rik|AU042386|-|2|2 E3|protein-coding	1.64793	2.81929	2.35954	2.53879	2.18882	2.76318	3.11482	4.33937	3.60884	4.70093	3.607	3.76206	0.696237	1.70169	13.5857	0.000227909	0.0107741	66541	Immp1l
Pfdn1|2700086I23Rik|AA408327|AU044714|-|18|18 B2|protein-coding	22.2112	24.9331	23.3809	26.7602	24.2889	24.1478	26.8653	29.3931	31.427	37.6746	30.3375	32.0074	0.368446	4.80363	13.5607	0.000230969	0.0108464	67199	Pfdn1
Klf12|2700063E05Rik|AI225908|AI315654|AP-2rep|B130052C06Rik|D530033K05Rik|-|14 E2.2-E2.3|14 50.9 cM|protein-coding	43.7776	42.2012	37.5382	22.9177	39.6813	34.72	28.6174	31.6037	24.8108	12.3567	20.6759	21.4975	-0.664311	4.91385	13.5606	0.000230989	0.0108464	16597	Klf12
Uqcc2|2900010M23Rik|Cbp6|M19|Mnf1|-|17|17 A3.3|protein-coding	28.6596	33.0385	26.4912	38.4935	30.0787	32.6176	38.5459	42.8206	37.7425	55.0009	37.6159	41.8604	0.423036	5.21098	13.5116	0.000237097	0.011059	67267	Uqcc2
C77370|A230051P11|C77386|KIDLIA|Kiaa2022|Xpn|mKIAA2022|-|X|X D|protein-coding	77.8109	82.288	78.0794	66.8318	74.1376	74.8462	61.7124	34.1419	68.1169	46.6064	59.58	58.4015	-0.466169	6.03051	13.5167	0.000236449	0.011059	245555	C77370
Lrrc58|1810012N18Rik|C330018J07Rik|-|16|16 B3|protein-coding	161.139	150.568	172.139	145.26	157.454	156.961	140.362	122.894	132.249	90.1907	132.622	117.997	-0.358662	7.13066	13.4986	0.000238737	0.0110691	320184	Lrrc58
Tmsb10|Ptmb10|Tb10|-|6|6 C1|protein-coding	5.66027	8.19355	7.77576	9.81206	7.27255	9.07045	10.4152	10.9712	10.3002	12.7597	11.8516	11.5848	0.5076	3.28953	13.4974	0.000238896	0.0110691	19240	Tmsb10
Lifr|A230075M04Rik|AW061234|LIF|-|15 A1|15 3.46 cM|protein-coding	98.9473	90.4815	102.586	85.7698	95.0373	95.0895	91.0112	62.5525	79.2442	54.5979	73.0418	73.2109	-0.390675	6.38557	13.4486	0.000245189	0.0111779	16880	Lifr
Larp4|DXErtd793|DXErtd793e|-|15|15 F1|protein-coding	40.1951	38.1485	39.8441	38.1504	36.7158	41.0273	29.6882	26.9369	33.1563	27.4669	33.6868	34.0377	-0.338138	5.133	13.4695	0.000242474	0.0111779	207214	Larp4
Pfdn5|1190001O17Rik|1700010A06Rik|D15Ertd697e|Eig1|MM-1|-|15 F3|15 57.48 cM|protein-coding	50.0827	50.9234	55.6101	64.0186	51.8963	56.5852	67.5527	74.2606	65.1848	87.4373	63.3802	65.5674	0.362701	5.97362	13.4482	0.000245237	0.0111779	56612	Pfdn5
Gkn3|1190003M12Rik|-|6|6 D1|protein-coding	2.50772	1.23344	1.93053	2.53879	1.62397	2.3427	0.389353	1.06437	0.827027	1.27597	1.48145	1.13459	-0.946754	0.771557	13.4152	0.000249589	0.0113393	68888	Gkn3
Bod1|2310022M17Rik|BOD2.1|Fam44b|-|11 A4|11 18.55 cM|protein-coding	28.588	33.1266	28.6899	35.7488	34.88	35.0203	40.9794	38.2356	41.2762	50.7029	39.2906	41.4424	0.363095	5.22726	13.4021	0.000251349	0.0113823	69556	Bod1
Serp2|2810032E02Rik|-|14|14 D3|protein-coding	37.3292	46.9588	41.8282	52.9028	39.7519	44.5113	57.5269	60.1781	54.659	75.6178	49.3387	53.4452	0.41409	5.68049	13.3879	0.000253258	0.0114318	72661	Serp2
Slc19a2|AV276020|AW322295|DDA1|THTR1|TRMA|-|1 H2.2|1 71.56 cM|protein-coding	18.6288	19.6469	21.1822	22.9177	23.724	22.3457	18.6889	11.79	15.1872	17.7964	15.4586	16.1231	-0.436098	4.23146	13.3815	0.00025412	0.0114338	116914	Slc19a2
Vstm2l|Gm691|-|2|2 H1|protein-coding	45.7837	57.0906	39.7904	51.5305	54.4382	55.2036	67.1634	70.6581	67.4403	66.6189	59.902	59.1181	0.364149	5.85768	13.3686	0.000255877	0.0114759	277432	Vstm2l
Lrp6|C030016K15Rik|Cd|Gw|ska26|ska<m26Jus>|skax26|-|6 G1|6 65.37 cM|protein-coding	100.38	87.0455	98.5645	85.1522	103.44	95.3899	78.5519	72.8687	77.7405	70.3796	87.6631	67.8365	-0.325569	6.41913	13.3498	0.000258446	0.0115541	16974	Lrp6
Lyst|D13Sfk13|beige|bg|-|13 A1|13 5.28 cM|protein-coding	93.1438	75.6802	77.7576	52.8342	78.4446	70.9417	56.0668	42.8206	65.3351	36.4658	56.8747	58.2821	-0.506703	5.99723	13.3208	0.000262478	0.011697	17101	Lyst
Slirp|1810035L17Rik|-|12|12 D2|protein-coding	14.1865	17.4443	14.1036	13.1742	13.9802	14.9572	18.3969	21.7787	18.4201	28.8771	17.713	17.9146	0.489601	4.1453	13.3148	0.000263322	0.0116973	380773	Slirp
Vps72|Tcfl1|YL-1|-|3|3 F2.1|protein-coding	15.4762	15.1537	14.05	16.2619	13.5566	15.3176	18.6889	18.6675	18.345	22.0944	19.6453	19.2283	0.379787	4.11583	13.2417	0.000273795	0.0121241	21427	Vps72
C2cd4b|3300001A09Rik|Fam148b|-|9|9 C|protein-coding	0.788139	1.40964	0.643511	0.548927	1.12972	0.901038	2.33612	0.736874	2.4059	1.88037	1.93232	1.61231	1.02628	0.559158	13.211	0.000278316	0.0122538	75697	C2cd4b
Osr1|Odd1|Osr|-|12 A1.1|12 4.05 cM|protein-coding	6.37676	4.05273	4.98721	5.28342	4.30704	6.90796	2.33612	0.982499	3.68403	2.88771	3.73583	3.64263	-0.87315	2.10326	13.2099	0.000278475	0.0122538	23967	Osr1
Stard10|AV048538|CGI-52|NY-C0-28|PC-TP2|PCTP2|Pctpl|Sdccag28|SdccagG28|TISP-81|-|7|7 E2|protein-coding	18.5571	19.735	17.8038	23.398	20.8997	20.0631	27.9361	72.1318	24.5853	30.8247	24.154	26.7524	0.775623	4.77048	13.1802	0.00028293	0.0123334	56018	Stard10
Rps24|-|-|14|14 A3|protein-coding	14.903	15.9466	14.1036	16.605	12.9917	14.8972	19.565	21.4512	17.6683	27.7355	19.9673	16.9591	0.464875	4.15794	13.1838	0.000282377	0.0123334	20088	Rps24
Rasgef1c|9130006A14Rik|-|11|11 B1.3|protein-coding	2.00617	2.20257	2.03779	2.33294	1.34154	1.62187	3.40684	30.7031	4.36069	1.88037	2.31879	2.50804	1.9619	2.23146	13.1879	0.000281765	0.0123334	74563	Rasgef1c
Pde3a|A930022O17Rik|C87899|-|6|6 G2|protein-coding	4.22729	4.75755	4.50458	2.95048	4.37765	5.04581	1.94676	2.78375	3.45848	0.940186	2.83407	2.20946	-0.86725	1.80444	13.1738	0.000283895	0.0123371	54611	Pde3a
Klhl28|2810440N09Rik|4122402F11Rik|4931401E10Rik|Btbd5|-|12|12 C1|protein-coding	13.2551	12.5106	13.2456	11.3216	16.0985	13.3354	10.4152	9.33374	9.92432	3.96221	9.14633	8.95729	-0.629275	3.47286	13.1511	0.000287352	0.0123839	66689	Klhl28
Npy|0710005A05Rik|-|6 B2.3|6 24.04 cM|protein-coding	25.1488	19.735	28.7435	30.0537	27.0426	26.5506	29.2015	82.9393	37.7425	47.5465	33.3648	30.4548	0.730448	5.12843	13.1524	0.000287156	0.0123839	109648	Npy
Syt10|-|-|15|15 E3|protein-coding	7.37985	8.19355	6.48874	6.03819	7.8374	6.18713	3.79619	6.2225	4.73661	2.28331	4.50875	4.2995	-0.703395	2.53549	13.1493	0.000287626	0.0123839	54526	Syt10
Tesk1|AI326901|-|4|4 A5|protein-coding	46.2853	54.5356	49.3895	58.1176	58.957	56.6452	72.1276	68.775	63.0044	70.2453	60.9326	70.9417	0.325684	5.92945	13.1101	0.000293705	0.0126029	21754	Tesk1
H2-K1|H-2K|H-2K(d)|H2-K|K-f|-|17 B1|17 17.98 cM|protein-coding	24.6473	14.6251	22.7374	31.8377	20.1231	31.4763	12.654	18.1762	16.9916	17.7292	16.7468	15.108	-0.579231	4.35391	13.0941	0.000296231	0.0126029	14972	H2-K1
Zbtb17|AA589413|Lp-1|Miz1|Zfp100|mZ13|-|4|4 D3|protein-coding	28.1581	27.2237	27.3492	29.9851	26.972	28.653	34.0684	44.54	33.9081	38.6819	32.9139	31.7685	0.357233	5.00603	13.0935	0.000296317	0.0126029	22642	Zbtb17
Mga|AV312082|C130042M01Rik|C80739|D030062C11Rik|Mad5|-|2|2 E5|protein-coding	85.6923	79.733	81.9404	73.762	83.8814	72.5035	63.0752	70.9037	67.741	50.1656	64.3464	63.2385	-0.332027	6.16105	13.0981	0.00029559	0.0126029	29808	Mga
Epm2aip1|A930003G21Rik|mKIAA0766|-|9|9 F3|protein-coding	222.757	226.688	231.181	212.435	227.002	220.874	186.013	182.008	186.382	139.953	184.022	196.822	-0.31874	7.65461	13.0737	0.000299467	0.0126983	77781	Epm2aip1
Timm8b|Tim8b|-|9|9 A5.3|protein-coding	47.7899	54.5356	54.9666	53.5203	47.7305	46.854	64.9246	64.4356	59.17	87.303	59.4512	61.0887	0.376474	5.87297	13.0295	0.00030663	0.0129628	30057	Timm8b
Zfp26|5033428C05Rik|KRAB15|Zfp-26|Zfp70|Zfp81-rs1|mKIAA4196|mkr-3|mszf14|mszf52|-|9 A3|9 7.55 cM|protein-coding	51.5873	43.9633	50.5693	43.0907	48.366	45.2321	35.6258	35.6156	44.058	26.1909	38.7753	35.4112	-0.391903	5.38195	12.97	0.000316517	0.0132605	22688	Zfp26
Ddi2|1110056G13Rik|1700027M01Rik|9130022E05Rik|AI604911|AU040698|-|4|4 E1|protein-coding	42.5595	48.1922	45.6357	37.0525	48.4366	46.4936	43.1208	29.6387	36.2388	25.3179	32.7851	34.4557	-0.415332	5.29612	12.974	0.000315842	0.0132605	68817	Ddi2
Tubb3|3200002H15Rik|M(beta)3|M(beta)6|-|8|8 E1|protein-coding	115.427	137.705	107.574	151.641	137.967	131.792	162.555	181.926	150.82	189.85	142.477	174.369	0.357884	7.21711	12.9754	0.000315605	0.0132605	22152	Tubb3
Marveld1|AI504298|Mrvldc1|-|19|19 C3|protein-coding	10.9623	11.8058	13.0311	11.3902	11.862	14.1163	6.81367	9.82499	8.34545	7.6558	10.1769	9.7933	-0.471746	3.41474	12.9573	0.000318669	0.0133108	277010	Marveld1
Neto1|AI851453|Btcl1|C130005O10Rik|-|18|18 E4|protein-coding	184.568	176.205	182.489	160.012	179.695	177.625	127.708	121.83	163.15	98.3166	145.826	155.618	-0.384231	7.28776	12.9385	0.000321897	0.0134057	246317	Neto1
Iigp1|2900074L10Rik|AI046432|AW111922|Ifgga1|Iigp|Irga6|-|18|18 D3|protein-coding	1.71958	0.96913	1.60878	1.92124	1.12972	1.5618	0.486691	0.736874	0.977395	0.671561	1.15939	0.477722	-0.976304	0.357012	12.9251	0.000324209	0.013422	60440	Iigp1
Col6a6|E330019B14|E330026B02Rik|-|9|9 F1|protein-coding	7.02161	3.70031	4.66546	3.49941	3.38915	5.76664	2.62813	2.04687	3.53366	1.6789	3.54259	1.61231	-0.902875	1.90942	12.9257	0.000324105	0.013422	245026	Col6a6
Hif3a|Ipas|MOP7|NEPAS|bHLHe17|-|7|7 A2|protein-coding	12.6819	7.84114	9.9208	8.02805	11.9326	10.7524	4.18554	10.3981	7.36806	4.36515	4.83081	5.37437	-0.747027	3.05368	12.9077	0.000327235	0.0134676	53417	Hif3a
Atp6ap1l|EG435376|-|13|13 C3|protein-coding	1.36133	1.85016	1.82328	1.44093	1.27093	1.44166	2.82281	15.2287	2.55627	3.22349	1.35263	2.44833	1.57848	1.63574	12.9125	0.000326396	0.0134676	435376	Atp6ap1l
Gipc1|GIPC|Glut1CIP|Rgs19ip1|Semcap1|TIP-2|TaxIP2|-|8|8 C2|protein-coding	32.6003	38.7652	30.5132	40.9636	32.2675	37.363	44.4836	46.0956	43.6069	52.1132	40.7076	44.0699	0.352795	5.33665	12.8925	0.000329902	0.0135376	67903	Gipc1
Chic1|Brx|ENSMUSG00000073019|Gm10454|-|X D|X 46.08 cM|protein-coding	69.6429	68.5439	70.5717	61.2739	68.2066	61.0904	49.4478	54.5287	53.7568	39.7564	61.0614	52.9674	-0.357739	5.89222	12.866	0.000334601	0.0136903	12212	Chic1
Zbtb41|8430415N23Rik|9430031N01|9830132G07Rik|AI316857|-|1|1 E4|protein-coding	43.5626	45.461	44.1341	37.3956	43.141	41.9884	34.0684	34.5512	36.9155	25.5193	36.2633	32.6045	-0.355449	5.25213	12.8449	0.000338398	0.0137651	226470	Zbtb41
Abca5|ABC13|B930033A02Rik|mKIAA1888|-|11|11 E1|protein-coding	82.2531	76.8256	83.2275	74.5168	84.2344	77.1889	67.2607	65.1725	65.5607	51.5759	67.1804	68.7323	-0.31167	6.17253	12.8455	0.000338292	0.0137651	217265	Abca5
Vegfb|VEGF-B|Vrf|-|19|19 A|protein-coding	48.5064	45.3729	48.2633	53.5203	48.7896	51.239	58.1109	69.43	57.3656	79.3786	57.8409	57.0878	0.358515	5.81697	12.7899	0.000348488	0.0141345	22340	Vegfb
Nkx6-2|Gtx|Nkx6.2|-|7 F4|7 84.57 cM|protein-coding	5.44533	6.78391	4.1292	4.39141	6.70769	5.76664	6.71634	11.135	8.87174	7.25286	8.43781	8.18099	0.614274	2.82577	12.7175	0.000362252	0.0145661	14912	Nkx6-2
Ube2m|2510040H03Rik|UBC12|Ubc-rs2|-|7 A1|7 7.73 cM|protein-coding	88.2716	97.2654	92.0221	104.502	99.9798	96.8916	111.744	117.982	113.603	140.961	111.173	119.968	0.305975	6.75485	12.7224	0.000361294	0.0145661	22192	Ube2m
Rsc1a1|1700027M01Rik|OTTMUSG00000010365|Rs1|-|4|4 E1|protein-coding	28.4447	32.7742	30.1914	26.1426	32.9736	32.137	28.2281	21.2875	23.9086	17.4606	23.5099	24.125	-0.401411	4.74954	12.7186	0.000362029	0.0145661	69994	Rsc1a1
Wfikkn2|2610304F08Rik|AY100450|Gasp1|WFIKKNRP|-|11|11 D|protein-coding	8.02469	2.81929	3.91469	3.36218	5.78979	4.6854	0.389353	0.982499	1.35332	1.00734	5.21727	1.07487	-1.49024	1.77427	12.6922	0.000367189	0.0147223	278507	Wfikkn2
Reps2|POB1|-|X|X F4|protein-coding	329.944	330.121	345.029	324.759	350.918	334.045	312.456	211.729	283.069	189.045	253.65	282.155	-0.395379	8.2081	12.6611	0.000373349	0.0149265	194590	Reps2
Zbed6|Gm8466|MGR|-|1|1 E4|protein-coding	49.6528	45.2848	44.295	22.506	49.7781	36.8224	30.4669	30.4575	24.7356	4.70093	15.9739	12.5402	-1.0652	4.94022	12.6415	0.000377284	0.0149556	667118	Zbed6
Kcnh3|AU019351|C030044P22Rik|Elk2|Kv12.2|Melk2|-|15|15 F1|protein-coding	71.0042	77.0018	61.1336	71.9094	79.3625	80.4326	98.7009	138.123	86.086	89.3177	85.6663	89.6326	0.413999	6.4226	12.6494	0.000375696	0.0149556	16512	Kcnh3
Esyt1|Fam62a|Mbc2|vp115|-|10|10 D3|protein-coding	13.3267	11.6296	14.6399	15.7816	13.486	15.5579	10.9992	10.8075	8.64619	10.2077	10.821	11.4056	-0.428368	3.63794	12.6451	0.000376556	0.0149556	23943	Esyt1
Lamb2|AW211941|Lamb-2|Lams|npht|-|9 F2|9 59.4 cM|protein-coding	53.1636	40.7916	51.8563	46.1784	50.1311	59.4685	37.1832	41.0193	35.5622	35.257	47.2131	36.4263	-0.37549	5.4823	12.616	0.000382451	0.0150286	16779	Lamb2
Antxr2|2310046B19Rik|AW561899|CMG-2|CMG2|cI-35|-|5|5 E3|protein-coding	4.44224	1.32154	4.61183	3.84249	2.68308	3.24374	1.84943	1.31	1.65405	1.61175	2.31879	1.9706	-0.914157	1.46913	12.6143	0.000382801	0.0150286	71914	Antxr2
Maf|2810401A20Rik|A230108G15Rik|AW047063|c-maf|-|8 E1|8 62.61 cM|protein-coding	27.5132	20.2636	25.7405	22.8491	26.2659	25.2291	18.4943	18.6675	20.3749	16.2518	21.0623	18.452	-0.385911	4.45507	12.6113	0.000383422	0.0150286	17132	Maf
Dhx33|3110057P17Rik|9430096J02Rik|Ddx33|-|11|11 B4|protein-coding	91.1376	88.8957	87.3567	79.1827	91.86	87.3406	78.8439	44.54	78.7931	61.0449	69.7569	65.2091	-0.401302	6.26947	12.5947	0.000386835	0.0151201	216877	Dhx33
Pdzrn3|1110020C07Rik|AI429718|AL023082|LNX3|SEMACAP3|Semcap3|-|6|6 D3|protein-coding	12.5386	11.7177	13.5674	12.6253	10.238	12.194	18.5916	21.2875	12.7061	15.5131	14.6857	18.9895	0.477234	3.87473	12.5746	0.000391018	0.0151987	55983	Pdzrn3
Cobl|-|-|11 A1|11 7.3 cM|protein-coding	22.1396	22.3781	23.7563	25.5937	20.6879	22.586	33.7764	126.087	27.8934	31.832	23.832	39.4121	1.04325	5.13018	12.5793	0.000390043	0.0151987	12808	Cobl
2700060E02Rik|-|-|14|14 A3|protein-coding	20.205	22.2019	20.6996	22.7805	20.0525	24.328	26.3787	25.8725	29.3219	33.7124	26.2152	26.1553	0.364642	4.6415	12.565	0.000393042	0.015235	68045	2700060E02Rik
Sdk1|5330440E10|6720466O15Rik|-|5|5 G2|protein-coding	11.034	12.2463	10.5107	9.46898	11.509	10.3319	9.05245	8.02374	8.1199	6.78277	8.24458	7.88242	-0.437197	3.25795	12.5499	0.000396232	0.015274	330222	Sdk1
Fzd1|AW227548|FZ-1|Fz1|-|5 A1|5 2.61 cM|protein-coding	13.1118	14.4488	14.1036	14.7524	12.9917	16.3989	10.2205	10.48	11.2025	11.7523	10.821	10.7487	-0.394561	3.67231	12.5539	0.000395376	0.015274	14362	Fzd1
Tsen15|5730449L18Rik|AL023077|Sen15|-|1|1 G2|protein-coding	5.66027	7.22442	6.00611	6.24404	5.78979	5.16595	8.07907	8.18749	8.79656	12.1553	7.72929	7.76298	0.552466	2.91048	12.4816	0.000410974	0.0157988	66637	Tsen15
Rasl10b|B230331P10Rik|Gm729|VTS58635|-|11|11 C|protein-coding	203.125	243.516	179.861	208.592	232.933	214.627	276.538	436.312	292.542	260.23	240.445	252.536	0.455279	7.98588	12.4673	0.000414129	0.0158764	276952	Rasl10b
Fscn1|AI663989|Fan1|fascin-1|-|5 G2|5 81.84 cM|protein-coding	118.221	142.55	118.835	145.122	134.577	138.82	164.891	220.817	150.293	177.897	150.85	157.947	0.357633	7.24637	12.4508	0.000417805	0.0159736	14086	Fscn1
Pggt1b|2010207C17Rik|2610100E13|AI451237|AI551093|BGG1|GGT1|-|18|18 C|protein-coding	14.903	15.418	14.1036	12.145	14.3333	13.1552	10.9019	11.79	11.5784	7.85727	9.33956	10.4502	-0.443483	3.62027	12.438	0.000420686	0.0160399	225467	Pggt1b
Hmgb3|Hmg2a|Hmg4|-|X|X A7.3|protein-coding	0.501543	1.32154	1.01889	0.82339	0.988501	1.86214	1.55741	4.9125	2.25553	3.15634	1.93232	1.19431	1.18859	0.928903	12.41	0.000427031	0.0162376	15354	Hmgb3
Kcnq3|-|-|15 D1|15 29.16 cM|protein-coding	33.3885	32.0694	27.0811	13.1056	29.5138	23.1867	25.6973	14.5737	16.5405	6.24552	12.3025	11.2862	-0.87387	4.35749	12.4025	0.000428763	0.0162593	110862	Kcnq3
Slc9a7|A530087D17Rik|NHE7|-|X|X A1.3|protein-coding	20.0617	24.3164	18.9836	11.0471	22.8061	17.7805	16.3528	11.2169	13.0069	4.56662	12.3025	9.55444	-0.782485	3.93262	12.3881	0.000432073	0.0163261	236727	Slc9a7
Sdf2l1|-|-|16|16 A3|protein-coding	5.58863	7.31253	7.77576	7.95943	8.19044	7.14823	11.7779	10.7256	8.1199	10.745	10.8854	9.61416	0.487688	3.15967	12.3847	0.000432857	0.0163261	64136	Sdf2l1
Chm|Rep-1|-|X|X E1|protein-coding	75.5181	71.8037	78.0794	72.7328	72.3724	76.6483	62.2965	55.1837	63.6059	51.3744	62.414	68.2546	-0.300371	6.0808	12.3635	0.000437798	0.0164239	12662	Chm
Atp13a3|AU022875|Gm1745|Gm541|Gm542|-|16|16 B2|protein-coding	111.629	110.217	113.794	106.011	121.656	110.287	97.4355	88.7524	101.424	70.9169	93.5245	88.498	-0.318199	6.6628	12.3498	0.000441025	0.0164981	224088	Atp13a3
1500011K16Rik|-|-|2|2 F1|ncRNA	14.903	17.18	16.9994	18.389	13.9802	19.943	23.0692	20.8781	21.1268	29.4144	20.1606	22.3932	0.433673	4.32212	12.3451	0.000442135	0.0164981	67885	1500011K16Rik
Mfap4|1110007F23Rik|-|11 B2|11 37.96 cM|protein-coding	6.37676	4.05273	5.68435	6.86158	5.57797	7.0281	2.92015	1.80125	3.75921	3.69359	5.60374	2.98576	-0.769208	2.29016	12.3214	0.000447799	0.016665	76293	Mfap4
Mrpl52|1110047B07Rik|-|14|14 C2|protein-coding	13.47	14.537	15.4979	16.6736	14.6157	15.4378	18.0076	19.4044	19.4727	27.6012	19.1944	18.034	0.432133	4.154	12.3061	0.000451475	0.0167573	68836	Mrpl52
Drd2|D2R|Drd-2|-|9 A5.3|9 26.72 cM|protein-coding	2.86596	4.14083	3.27118	2.95048	2.8949	3.00346	1.65475	98.2499	10.7514	3.02203	1.48145	2.38861	2.61621	3.4915	12.2904	0.000455284	0.0168539	13489	Drd2
Sec24d|2310020L09Rik|Gm1349|-|3|3 G1|protein-coding	38.1889	36.4745	36.3584	37.327	41.164	36.8825	28.0334	14.5737	29.773	26.9296	33.9445	28.305	-0.484723	5.02257	12.2841	0.000456829	0.0168665	69608	Sec24d
Prdm11|8030443D09Rik|AA163972|Gm707|-|2|2 E1|protein-coding	2.65101	4.05273	2.30592	2.12709	3.03611	2.3427	1.75209	1.31	1.4285	0.604405	1.86791	1.91089	-0.878207	1.16687	12.2559	0.0004638	0.016966	100042784	Prdm11
Chchd1|1110001O19Rik|2400010G13Rik|MRP-S37|-|14|14 A3|protein-coding	13.5417	12.3344	13.9964	13.5173	11.2266	15.618	16.8395	17.7669	16.3902	22.9674	17.5841	16.6606	0.429518	3.98608	12.2648	0.000461582	0.016966	66121	Chchd1
Mir9-3hg|AI854517|-|7|7 D2|ncRNA	21.3514	25.3736	22.0403	23.8097	20.4055	24.5082	27.1574	32.0131	27.8182	29.683	26.1508	31.5297	0.344398	4.70663	12.2583	0.000463188	0.016966	101694	Mir9-3hg
Setx|A130090N03|A930037J23Rik|AOA2|AW060766|Als4|SCAR1|Sen1|mKIAA0625|-|2|2 B|protein-coding	93.8602	96.8249	94.3817	83.6427	98.0028	94.9694	81.6668	70.8218	82.7779	64.2684	72.591	82.0488	-0.306815	6.40598	12.2293	0.000470443	0.0170985	269254	Setx
Jmjd1c|5430433L24Rik|D630035I23Rik|Jmjdic|TRIP8|-|10|10 B5.1|protein-coding	125.672	127.749	117.602	87.6224	108.17	116.414	97.9222	89.9806	96.0855	74.8791	87.5343	90.5283	-0.347973	6.6698	12.192	0.000479941	0.0172365	108829	Jmjd1c
Ecm2|9030618O22Rik|BC065151|tenonectin|-|13|13 A5|protein-coding	12.037	7.40063	10.5643	9.26314	9.32016	11.0527	5.25626	4.42125	8.42064	6.91708	8.24458	6.15067	-0.59381	3.07911	12.1902	0.0004804	0.0172365	407800	Ecm2
Ptchd4|3110082D06Rik|Gm321|-|17|17 B3|protein-coding	3.86905	4.93375	4.98721	4.04833	5.08372	4.14477	2.43346	2.78375	3.8344	2.149	3.09172	3.04548	-0.636115	1.94755	12.1958	0.000478962	0.0172365	627626	Ptchd4
Zfp738|3830402I07Rik|6720487G11Rik|-|13|13 B3|protein-coding	14.2582	12.7749	12.763	9.46898	11.6502	12.0739	8.6631	9.08812	9.32285	7.52149	9.5328	9.3753	-0.446278	3.41886	12.1918	0.000480002	0.0172365	408068	Zfp738
Dock10|9330153B10Rik|A630054M16Rik|Jr4|Jr5|R75174|ZIZ3|Zizimin3|mKIAA0694|-|1|1 C5|protein-coding	118.508	113.036	103.498	80.006	109.724	95.0295	58.0136	75.3249	95.6344	68.835	88.5004	77.7493	-0.416144	6.49964	12.1984	0.00047831	0.0172365	210293	Dock10
Brwd3|Brodl|D030064D06Rik|Gm596|-|X|X D|protein-coding	13.8283	11.2771	12.5485	5.83234	14.1214	9.97149	6.71634	7.20499	8.19509	3.15634	8.82428	4.59808	-0.806439	3.1709	12.1819	0.000482549	0.0172693	382236	Brwd3
Lamtor1|2400001E08Rik|Pdro|p18|-|7|7 E2|protein-coding	12.3236	14.6251	10.9933	13.9976	13.6272	14.3565	14.8927	16.4569	17.5179	20.4155	18.8724	17.616	0.411227	3.96436	12.1671	0.000486388	0.0173623	66508	Lamtor1
Rnf126|2610010O19Rik|-|10|10 C1|protein-coding	46.5719	54.7118	41.3456	52.7656	49.9193	51.4793	58.987	61.57	61.8015	74.0061	56.1018	61.9844	0.337156	5.80877	12.1554	0.000489448	0.0173829	70294	Rnf126
Comt|Comt1|D16Wsu103e|D330014B15Rik|-|16 A3|16 11.4 cM|protein-coding	52.0172	54.7999	46.9227	54.7554	55.2855	48.2356	59.0843	75.4887	62.4781	69.7081	60.0308	61.6859	0.317374	5.87008	12.158	0.000488767	0.0173829	12846	Comt
Eya2|Eab1|-|2 H3|2 85.83 cM|protein-coding	4.87213	1.85016	3.80744	3.22494	2.68308	4.32498	1.36273	1.71937	2.48108	1.74606	2.64084	1.49288	-0.858609	1.52161	12.1172	0.000499589	0.0176981	14049	Eya2
Drd1|C030036C15Rik|Drd-1|Drd1a|Gpcr15|-|13 B1|13 28.4 cM|protein-coding	6.94996	6.69581	4.87996	7.75359	4.51886	8.58989	3.40684	138.532	16.2398	7.92442	5.21727	8.41985	2.1882	4.18208	12.1114	0.000501157	0.0177088	13488	Drd1
Kctd17|2900008M13Rik|AA414907|AW742389|N28155|-|15|15 E1|protein-coding	54.0234	67.6629	51.6418	69.9195	72.2312	67.4577	76.2158	107.747	77.515	82.3334	74.3945	82.1682	0.38631	6.20386	12.0826	0.000508945	0.0179387	72844	Kctd17
Rps6kb2|70kDa|S6K2|-|19|19 A|protein-coding	21.7097	20.4398	19.9488	19.7614	22.1001	19.8228	26.9627	28.4925	23.9086	26.9296	26.022	23.7667	0.333475	4.55063	12.0675	0.000513086	0.0180392	58988	Rps6kb2
Angpt1|1110046O21Rik|Ang-1|Ang1|-|15 B3.1|15 16.69 cM|protein-coding	9.60097	8.98648	10.2426	8.30251	9.17894	10.5722	6.52166	3.93	6.54103	6.31268	6.69872	8.599	-0.553414	3.02542	12.0458	0.000519101	0.018205	11600	Angpt1
Tnks|4930554K12Rik|AI662855|ARTD5|C86528|D130072O21Rik|TANK1|mTNKS1|-|8 A4|8 21.16 cM|protein-coding	103.39	110.305	93.8454	66.626	103.51	92.4465	82.7375	67.7925	75.2595	35.0555	64.1531	67.538	-0.539095	6.32798	12.0177	0.000526977	0.018435	21951	Tnks
Gpr165|6530406P05Rik|-|X C3|X|protein-coding	10.7474	10.7485	10.8324	12.145	9.95562	11.9538	8.07907	8.92437	8.19509	3.62643	6.50549	8.77814	-0.594046	3.22606	12.0046	0.000530694	0.0185187	76206	Gpr165
Gm15421|OTTMUSG00000021442|-|5|5 A3|pseudo	1.14638	2.46688	1.2334	1.92124	1.12972	1.80208	2.72547	1.80125	2.48108	3.29065	3.15613	3.28434	0.811729	1.22254	11.9907	0.000534656	0.0186105	100042049	Gm15421
Nudc|SIG-92|Silg92|-|4|4 D2.3|protein-coding	39.4786	40.4392	41.8282	47.9625	42.2231	47.3345	47.0144	57.8856	51.0501	64.6714	54.4271	51.8329	0.334593	5.61444	11.9808	0.000537527	0.0186613	18221	Nudc
Tomm6|1110002E23Rik|AI663970|-|17|17 C|protein-coding	61.3316	66.5176	68.963	71.4291	57.3331	67.758	87.6044	84.5768	76.688	116.046	74.8453	72.3152	0.380084	6.23977	11.9764	0.000538782	0.0186613	66119	Tomm6
Rxrg|Nr2b3|-|1 H2.3|1 74.99 cM|protein-coding	3.9407	3.96462	2.84217	5.96958	4.09522	4.8656	7.68972	51.8268	7.29287	6.04405	4.31552	4.41893	1.66442	3.15117	11.9693	0.000540851	0.0186867	20183	Rxrg
Irs1|G972R|IRS-1|-|1 C5|1 42.0 cM|protein-coding	35.108	37.7961	37.0019	33.759	40.3167	36.7623	28.9094	18.34	28.57	23.9076	35.5548	28.9022	-0.425169	5.01099	11.9636	0.000542497	0.0186974	16367	Irs1
Mbtps2|9630032G22Rik|AI662535|-|X|X F4|protein-coding	50.3693	43.699	48.317	46.3157	49.9899	43.3099	40.9794	33.3231	41.5769	31.8992	39.4194	38.3372	-0.323347	5.40754	11.9504	0.000546354	0.0187841	270669	Mbtps2
Cryab|Crya-2|Crya2|HspB5|P23|-|9 A5.3|9 27.75 cM|protein-coding	67.9233	70.0417	74.111	70.3312	65.4529	62.8924	80.8881	111.759	75.2595	90.1235	92.3007	73.1512	0.349418	6.28484	11.928	0.000552964	0.0189482	12955	Cryab
Bmp6|D13Wsu115e|Vgr1|-|13 A3.3|13 18.15 cM|protein-coding	25.2921	13.5678	24.2389	19.9672	24.0771	23.7874	13.53	15.2287	10.9769	10.8121	22.8658	11.0473	-0.633591	4.18217	11.9251	0.000553834	0.0189482	12161	Bmp6
Abca8b|Abca8|-|11 E1|11 72.88 cM|protein-coding	41.1982	36.6507	39.3614	29.9165	35.3036	38.204	28.0334	27.8375	30.9759	21.087	30.2731	31.2908	-0.380417	5.03003	11.9189	0.00055566	0.0189643	27404	Abca8b
Il1rap|6430709H04Rik|AI255955|AV239853|IL-1RAcP|-|16|16 B2|protein-coding	41.7714	42.2893	33.9452	33.0728	42.2937	38.3241	24.4319	18.2581	34.5848	23.7061	36.1344	28.6036	-0.480121	5.05666	11.9125	0.000557579	0.0189835	16180	Il1rap
Josd2|1110007C05Rik|-|7|7 B3|protein-coding	18.1272	19.3826	15.2298	19.5555	17.9342	17.9607	22.3878	24.3169	22.1042	25.1164	23.1879	20.9601	0.354751	4.36698	11.9043	0.000560053	0.0190214	66124	Josd2
Mkln1|A130067F06Rik|AU015903|BB154892|-|6|6 A3.3|protein-coding	53.5935	55.0642	53.7868	44.0514	52.1787	49.8574	49.8372	37.0893	38.4943	29.3472	41.0941	41.8604	-0.37782	5.51262	11.8913	0.000563954	0.0191075	27418	Mkln1
Efhd2|2600015J22Rik|AA408606|D4Wsu27e|-|4 E1|4 74.75 cM|protein-coding	110.34	124.489	104.302	130.027	114.878	123.142	146.981	164.569	126.31	157.28	129.53	153.289	0.31232	7.04667	11.883	0.000566473	0.0191465	27984	Efhd2
Htr4|5-HT-4|5-HT4|5-HT<4L>|5HTR4|-|18|18 E1|protein-coding	12.7535	11.8058	11.8513	12.7625	13.4154	11.293	9.34447	4.74875	10.601	6.51415	10.3701	8.53928	-0.557807	3.39119	11.8698	0.00057051	0.0191531	15562	Htr4
Uaca|2700059D02Rik|nucling|-|9|9 B|protein-coding	16.6226	9.6913	19.5198	17.2226	15.816	18.8617	10.7072	11.9537	9.47322	9.8048	15.0077	10.0322	-0.548908	3.8006	11.869	0.000570773	0.0191531	72565	Uaca
Cntnap5a|Caspr5-1|EG636808|-|1|1 E2.3|protein-coding	13.0401	12.5106	10.1889	6.44989	12.1444	10.2118	5.54828	8.59687	9.39803	3.02203	5.73256	5.79238	-0.76169	3.1183	11.8697	0.000570556	0.0191531	636808	Cntnap5a
Yod1|6330564D18Rik|9930028C20Rik|Hshin7|-|1|1 E4|protein-coding	15.9777	16.8276	15.4979	14.2721	16.5927	17.6003	12.4593	11.4625	13.0821	7.32002	13.8483	11.4653	-0.475824	3.80883	11.864	0.000572302	0.0191584	226418	Yod1
Kcnj4|IRK3|Kcnf2|MB-IRK3|-|15 E1|15 37.74 cM|protein-coding	31.0957	37.7961	28.1	38.0132	37.7043	35.1405	35.8205	87.1149	49.0201	45.1961	41.4805	48.1305	0.561999	5.42551	11.8105	0.000588983	0.0196698	16520	Kcnj4
Cdc42ep2|1110008C05Rik|Borg1|Cep2|D19Bwg1013e|-|19 A|19 4.34 cM|protein-coding	6.30512	5.55047	5.20172	5.69511	7.06072	6.36733	8.46842	10.0706	7.51843	7.79011	8.43781	8.47957	0.487155	2.88022	11.8044	0.000590907	0.0196871	104252	Cdc42ep2
Dcc|C030036D22Rik|Igdcc1|-|18 E2|18 45.24 cM|protein-coding	52.0889	50.6591	50.891	39.111	47.3775	47.0342	39.714	37.0075	43.9076	30.2874	37.1006	37.6206	-0.348785	5.42209	11.781	0.000598378	0.0198886	13176	Dcc
Uqcrq|1100001F06Rik|1500040F11Rik|5830407L17Rik|9.5kDa|AA959903|QP-C|Qpc|Uqcrb|c1502|-|11|11 B1.3|protein-coding	58.1074	72.068	61.3481	72.6642	62.6992	67.9383	74.5611	81.0562	74.1317	101.54	81.2864	83.2431	0.330022	6.21636	11.7713	0.000601519	0.0199456	22272	Uqcrq
St8sia6|1700007J08Rik|AI314453|AI875066|ST8SiaVI|Siat8f|-|2|2 A1|protein-coding	5.08708	4.31703	4.66546	2.6074	4.44826	3.9045	2.72547	3.275	2.70663	1.34312	1.86791	2.80662	-0.773383	1.78945	11.7622	0.000604462	0.0199958	241230	St8sia6
Edf1|0610008L11Rik|AA409425|-|2|2 A3|protein-coding	30.8807	34.0077	31.4248	39.1796	36.7158	40.6668	42.8288	37.99	43.6069	57.1499	45.6028	47.6528	0.369821	5.35012	11.7292	0.000615284	0.0203058	59022	Edf1
Mapk11|P38b|Prkm11|Sapk2|Sapk2b|p38-2|p38beta|p38beta2|-|15|15 E3|protein-coding	21.9963	22.4662	23.4345	28.4069	23.9359	24.6884	34.6524	38.1537	25.0364	30.2874	28.0187	33.5003	0.38545	4.80699	11.7146	0.000620119	0.0203849	19094	Mapk11
Itih5|4631408O11Rik|5430408M01Rik|E130106B02|-|2|2 A1|protein-coding	76.9511	47.9279	65.4773	50.9129	49.8487	66.4966	41.8554	57.3943	40.5243	28.2056	47.0199	35.8889	-0.513047	5.66892	11.7132	0.000620593	0.0203849	209378	Itih5
Arpp21|0710001E13Rik|AI853636|ARPP-21|D9Bwg1012e|R3hdm3|Tarpp|-|9 F3|9 62.46 cM|protein-coding	65.3439	68.632	74.7546	86.1815	64.2526	76.5882	70.0835	936.158	125.633	99.5925	70.5298	85.3928	1.67056	7.24644	11.7049	0.000623352	0.0204276	74100	Arpp21
Zfas1|1500012F01Rik|Zfos1|-|2|2 H3|ncRNA	15.6911	19.3826	14.8008	16.7423	12.0032	17.0596	19.4676	19.65	21.9538	29.0786	17.713	24.4833	0.472147	4.258	11.7003	0.000624886	0.02043	68949	Zfas1
Rab3c|2700062I01Rik|3110015B08Rik|3110037E15Rik|AI850886|-|13|13 D2.1|protein-coding	494.593	532.757	552.454	519.01	539.722	544.888	484.939	364.507	452.684	347.197	407.785	458.076	-0.34005	8.89188	11.6846	0.000630197	0.0205556	67295	Rab3c
Ssr4|AW743063|C78062|Trap|-|X A7.3|X 37.41 cM|protein-coding	19.2736	22.9067	19.4662	22.0943	19.6994	24.1478	27.6441	26.2819	23.9838	33.6452	26.9237	26.1553	0.368921	4.61335	11.6744	0.000633671	0.0206208	20832	Ssr4
Slitrk4|6430513G13|D930039I09Rik|-|X|X A7.1|protein-coding	33.8183	35.9459	34.8032	32.1808	34.8094	32.3773	31.8296	25.7087	27.8934	15.916	24.0896	26.4539	-0.428043	4.89618	11.6557	0.000640053	0.0207802	245446	Slitrk4
Rpl14-ps1|ENSMUSG00000046721|Gm9811|-|7 B3|7|pseudo	86.8386	71.4513	80.8143	98.1206	82.4693	85.5986	93.4447	109.303	97.0629	140.558	101.833	106.174	0.359868	6.58931	11.643	0.000644452	0.0208746	100040970	Rpl14-ps1
Myl12b|1500001M02Rik|C77744|Mylc2b|RLC-B|-|17|17 E1.3|protein-coding	64.3408	73.5658	70.8935	77.879	71.1721	71.0018	84.5869	69.6756	89.3941	110.069	91.0124	96.6193	0.337272	6.33983	11.6014	0.000659023	0.0211023	67938	Myl12b
Lamp5|3110035N03Rik|6330527O06Rik|BAD-LAMP|LAMP-5|-|2|2 F3|protein-coding	29.0895	29.3382	29.2798	33.5531	27.9605	29.6141	35.1391	119.456	40.0732	43.853	34.4598	38.5761	0.800048	5.35484	11.607	0.000657027	0.0211023	76161	Lamp5
Kank2|AI504612|Ankrd25|BC010245|-|9|9 A3|protein-coding	18.9153	12.5106	18.2328	17.8401	16.5927	17.7805	11.8753	13.9187	10.9769	11.3494	15.2654	12.0625	-0.435701	3.9029	11.6036	0.000658236	0.0211023	235041	Kank2
Bdp1|AI662220|AW049390|AW456745|B130055N23Rik|G630013P12Rik|TAF3B1|TFC5|TFIIIB150|TFIIIB90|Tfnr|mKIAA1241|-|13 D1|13 52.92 cM|protein-coding	57.3192	54.9761	59.4712	48.2369	52.8142	53.1012	48.7664	43.8031	45.0354	33.9138	45.6028	42.159	-0.331987	5.61203	11.6112	0.00065555	0.0211023	544971	Bdp1
Lamc1|Lamb2|-|1 G3|1 65.3 cM|protein-coding	70.5027	58.324	70.8399	50.2268	61.5695	67.4577	56.5535	52.6456	48.2683	39.0177	51.2066	45.8613	-0.370737	5.81225	11.6165	0.000653678	0.0211023	226519	Lamc1
Eln|AI385707|AI480567|E030024M20Rik|-|5 G2|5 74.76 cM|protein-coding	10.8907	9.16268	13.8355	14.5466	12.1444	16.0985	5.3536	6.30437	8.64619	9.46901	12.238	7.94213	-0.613033	3.43031	11.5782	0.000667311	0.0213189	13717	Eln
Dnajb6|Mrj|mDj4|-|5|5 B1|protein-coding	8.52624	13.2154	9.7063	11.253	8.04923	10.452	12.8486	11.2169	14.0595	19.341	14.9433	14.2122	0.50795	3.6382	11.5671	0.000671285	0.0213484	23950	Dnajb6
Smc2|5730502P04Rik|AI255214|AW545314|CAP-E|CAPE|Fin16|SMC-2|Smc2l1|-|4 B2|4 28.31 cM|protein-coding	23.2859	19.3826	20.9677	19.6927	22.2413	20.1832	16.5475	11.2169	17.8939	16.7219	17.2621	15.526	-0.400699	4.21514	11.5695	0.000670421	0.0213484	14211	Smc2
Lmbrd2|9930036E21Rik|-|15|15 A1|protein-coding	43.4193	42.3774	41.7746	32.6611	47.4481	41.9283	34.4577	21.5331	33.2314	8.99892	27.2458	28.305	-0.700063	5.077	11.5529	0.000676421	0.0214211	320506	Lmbrd2
Ddit3|CHOP-10|CHOP10|chop|gadd153|-|10|10 D3|protein-coding	14.4731	13.9202	12.8166	12.3508	11.509	14.2364	15.2821	25.6269	16.9916	20.6169	15.1365	16.3023	0.470832	3.98957	11.5524	0.000676633	0.0214211	13198	Ddit3
Cyp2u1|8430436A10Rik|-|3|3 G3|protein-coding	7.23655	7.04822	7.34675	7.54774	7.13133	7.14823	6.13231	5.24	4.73661	3.62643	5.21727	5.67295	-0.51072	2.65991	11.5377	0.000681989	0.0215274	71519	Cyp2u1
Zfp575|AI326876|Znf575|-|7|7 A3|protein-coding	7.66645	7.31253	7.61488	7.34189	7.8374	6.72775	10.1232	10.0706	8.94693	11.2151	8.82428	10.5696	0.42557	3.13974	11.5348	0.000683068	0.0215274	101544	Zfp575
Rapgef5|4932413M22|C86120|D030051B22Rik|GFR|Mrgef|mKIAA0277|mmr-gef|-|12|12 F2|protein-coding	123.308	120.965	115.51	96.4052	121.091	123.743	102.594	63.8625	95.9351	52.5833	92.2362	99.7245	-0.467811	6.65554	11.5304	0.000684675	0.0215296	217944	Rapgef5
Zkscan2|9430065N20Rik|AW493225|Zfp694|-|7|7 F3|protein-coding	37.5441	37.2675	35.4467	25.0448	33.4678	37.5432	25.6973	31.7675	23.9086	12.0881	24.0252	23.3487	-0.552717	4.8612	11.5243	0.000686928	0.021552	210162	Zkscan2
Acvr2a|ActrIIa|Acvr2|TactrII|-|2 C1.1|2 28.38 cM|protein-coding	73.7269	71.5394	78.1866	80.1433	75.7616	85.8389	49.2531	54.0375	68.4929	59.2317	66.4719	71.8375	-0.331203	6.12386	11.5052	0.000694033	0.0216937	11480	Acvr2a
Utp20|3830408P06Rik|AA617408|Drim|mDRIM|mDRIN|-|10|10 C1|protein-coding	35.6812	36.034	33.1408	33.2101	40.4579	33.9391	32.803	29.0656	29.8482	23.0346	27.9543	24.6027	-0.34774	4.98958	11.5038	0.000694547	0.0216937	70683	Utp20
Vim|-|-|2 A1|2 10.04 cM|protein-coding	74.1568	47.7517	64.0294	65.3909	56.4858	70.2209	48.5718	46.505	49.1705	50.3671	56.3594	40.0689	-0.378536	5.80567	11.4972	0.000697003	0.021722	22352	Vim
Impad1|1110001C20Rik|AA408880|AI451589|AL022796|B230207P20|Jaws|gPAPP|-|4|4 A1|protein-coding	99.9504	101.406	100.71	83.1624	102.522	94.1885	75.3398	77.2081	80.6727	44.7931	76.8421	83.1237	-0.410099	6.4118	11.4854	0.000701459	0.0217639	242291	Impad1
Zfp81|AA409460|AA409461|C330034P10Rik|D330034E10Rik|Hszfp36|KRAB13|Zfp78|-|17|17 B1|protein-coding	14.9747	12.7749	13.6746	9.94929	12.4975	13.035	11.9726	8.92437	9.92432	6.37983	9.01751	8.77814	-0.491727	3.47598	11.4874	0.00070068	0.0217639	224694	Zfp81
Ccm2|BC029157|-|11|11 A1|protein-coding	29.0895	30.9241	28.3145	32.5239	29.9375	30.7554	33.5817	63.7806	38.1936	43.9201	34.9751	34.6946	0.456163	5.16968	11.4778	0.000704332	0.021787	216527	Ccm2
Hagh|BC019817|Glo-2|Glo2|Rsp29|-|17 A3.3|17 12.53 cM|protein-coding	41.1982	47.0469	44.0269	53.04	43.2822	44.8717	57.5269	52.5637	57.14	62.9253	51.0133	57.3864	0.308431	5.67598	11.4752	0.000705318	0.021787	14651	Hagh
Aoc3|SSAO|VAP1|-|11|11 D|protein-coding	2.36442	0.704822	2.73492	2.67602	2.04761	2.88332	1.07072	1.06437	0.902211	0.268625	1.99673	0.776298	-1.14868	0.855947	11.45	0.000714951	0.0220359	11754	Aoc3
Plekho2|AI840980|Plekhq1|-|9|9 C|protein-coding	18.2705	18.4135	19.4662	16.1247	17.5106	17.6003	23.8479	24.3169	21.6531	22.5645	23.5743	20.124	0.338664	4.3509	11.4333	0.000721379	0.0221852	102595	Plekho2
Akap10|1500031L16Rik|B130049N18Rik|D-AKAP-2|D-AKAP2|PRKA10|-|11|11 B2|protein-coding	35.323	33.8314	30.9422	25.4565	36.2215	32.6176	28.8121	25.7087	26.54	16.789	25.0558	22.6918	-0.419479	4.83073	11.3786	0.000742936	0.0225562	56697	Akap10
Jag1|ABE2|Gsfabe2|Htu|Ozz|Ser-1|-|2 F3|2 67.73 cM|protein-coding	24.1457	20.2636	24.9361	21.8884	24.1477	28.8332	14.9901	19.4862	21.1268	18.3336	19.8385	15.8843	-0.39633	4.41536	11.3782	0.000743114	0.0225562	16449	Jag1
Rasgef1b|4732452O09Rik|GPIgamma4|Gpig4|-|5|5 E3|protein-coding	8.31129	11.8058	10.9933	12.6939	8.68469	9.79128	13.0433	86.3781	11.3528	15.3788	12.4313	16.8994	1.3185	4.1814	11.3829	0.000741232	0.0225562	320292	Rasgef1b
Tpm2|Tpm-2|Trop-2|-|4|4 A5|protein-coding	9.38602	4.93375	14.7471	13.7232	8.33165	12.194	5.25626	7.45062	5.78919	7.92442	6.44108	6.09096	-0.704825	3.13015	11.3838	0.000740878	0.0225562	22004	Tpm2
Cep170|4933426L22Rik|A330004A13Rik|AI195353|-|1|1 H4|protein-coding	121.445	123.256	114.652	100.591	117.137	112.209	97.2409	91.4543	102.627	75.0806	91.9786	99.4856	-0.305154	6.7014	11.3795	0.000742604	0.0225562	545389	Cep170
Ptp4a3|AV088979|Prl-3|pPtp4a3|-|15|15 D3|protein-coding	21.7097	22.7305	21.1822	27.1719	22.9474	23.4871	27.1574	32.4225	26.0889	31.2948	27.1814	31.7088	0.338365	4.72182	11.373	0.000745206	0.0225707	19245	Ptp4a3
Hypk|2310003F16Rik|HSPC136|-|2|2 E5|protein-coding	27.2983	31.4527	25.9013	32.1122	23.7946	29.7943	29.3961	33.7325	37.5169	46.002	38.6465	35.7097	0.37909	5.03375	11.3223	0.000765838	0.0231455	67693	Hypk
Gxylt2|Glt8d4|Gm152|-|6|6 D3|protein-coding	2.36442	1.05723	1.2334	1.16647	1.27093	1.80208	0.584029	0.16375	1.05258	0.805874	1.09498	0.597153	-1.02006	0.332364	11.2999	0.000775124	0.0233757	232313	Gxylt2
Rps5|AA617411|-|7|7 A1|protein-coding	109.121	124.577	114.384	121.244	109.512	120.799	144.839	149.913	126.911	180.314	131.527	134.3	0.310851	7.03056	11.2617	0.00079123	0.0237709	20103	Rps5
Pi15|P24TI|P25TI|PI-15|SugarCrisp|-|1|1 A3|protein-coding	3.58245	2.46688	3.75382	3.22494	3.31854	3.66422	2.43346	0.49125	2.18034	1.41028	2.76966	1.79146	-0.854459	1.46659	11.2608	0.000791627	0.0237709	94227	Pi15
Meis2|A430109D20Rik|Mrg1|Stra10|-|2 E4-E5|2 58.28 cM|protein-coding	33.1019	46.2539	39.7368	43.7769	34.8094	38.7446	55.7748	240.876	55.486	51.5759	38.3244	57.3267	1.07828	5.93792	11.2477	0.000797207	0.0238872	17536	Meis2
Crip2|0610010I23Rik|AW743261|C77570|CRP2|CRP4|Crp|ESP1|Hlp|-|12 F1|12 61.57 cM|protein-coding	52.2322	54.888	50.9446	60.1075	53.5909	52.8609	69.8888	125.187	59.8467	78.1697	61.3191	61.7456	0.490111	6.02561	11.2399	0.000800592	0.0239373	68337	Crip2
Cox5b|-|-|1|1 B|protein-coding	12.6102	13.8321	16.8922	15.2327	14.7569	15.0173	18.1049	18.995	18.5705	21.087	18.5503	18.5714	0.363324	4.08695	11.221	0.000808752	0.0240785	12859	Cox5b
Camk1|AI505105|CaMKIalpha|D6Ertd263e|-|6 E3|6 52.75 cM|protein-coding	27.5132	29.5144	29.3334	31.4947	31.7733	32.2572	33.1923	43.5575	35.7125	44.6588	34.2021	36.8443	0.32728	5.10038	11.2222	0.000808254	0.0240785	52163	Camk1
Dynlrb1|2010012N15Rik|2010320M17Rik|9430076K19Rik|AV124457|DNLC2A|Dncl2a|km23-1|-|2|2 H1|protein-coding	110.698	106.516	121.999	126.939	107.888	109.026	131.601	134.93	138.189	190.186	132.815	133.284	0.334002	7.00918	11.2019	0.000817124	0.0241734	67068	Dynlrb1
Ctxn1|BC028881|Ctxn|-|8 A1.1|8 1.99 cM|protein-coding	281.079	304.395	261.587	317.623	272.262	288.632	334.746	369.256	346.374	423.89	329.268	331.539	0.307395	8.33021	11.203	0.000816653	0.0241734	330695	Ctxn1
Aldoart1|4921524E03Rik|Aldo1-ps|Aldo1-ps2|Aldoa-ps2|-|4|4 C3|protein-coding	29.3761	27.0475	27.671	34.5138	26.0541	31.4162	39.5193	28.6562	38.7199	42.8456	39.355	36.6055	0.358072	5.07115	11.2079	0.000814505	0.0241734	353204	Aldoart1
Tesc|1010001A17Rik|2410011K10Rik|TE-1|-|5 F|5 57.84 cM|protein-coding	28.0148	30.836	27.671	36.7781	29.9375	34.5999	39.3246	66.6462	42.5543	47.8152	34.653	32.3657	0.486229	5.23606	11.1781	0.000827667	0.0243822	57816	Tesc
Cyp46a1|Cyp46|-|12|12 F1|protein-coding	136.205	146.162	121.892	155.552	143.05	140.502	162.457	224.01	156.007	193.141	158.515	167.322	0.332007	7.31147	11.1599	0.000835844	0.0245714	13116	Cyp46a1
Slc6a12|BGT1|GAT-2|GAT2|Gabt2|-|6|6 F1|protein-coding	4.22729	0.528616	1.39427	2.47017	0.917894	3.00346	0.292015	0.573125	0.751843	0.470093	1.48145	1.07487	-1.40041	0.694599	11.1455	0.000842357	0.0246241	14411	Slc6a12
Cox5a|AA959768|CcOX|-|9|9 B|protein-coding	69.5712	89.8648	74.9154	90.024	73.7846	89.0225	103.86	94.3199	99.9951	137.2	95.3924	94.7084	0.360896	6.53672	11.1477	0.000841353	0.0246241	12858	Cox5a
Klhl11|BC011167|-|11|11 D|protein-coding	42.7745	47.0469	38.3425	31.5633	44.412	38.0238	35.6258	19.5681	32.8555	9.26755	23.7032	28.1856	-0.699771	5.03248	11.1283	0.000850207	0.0247453	217194	Klhl11
Rif1|5730435J01Rik|6530403D07Rik|AU016181|AW549474|D2Ertd145e|-|2 C1.1|2 29.98 cM|protein-coding	46.5719	43.3465	50.9446	40.8264	49.2839	46.4936	42.5368	37.0893	38.2688	25.385	36.9074	35.65	-0.365518	5.36645	11.1274	0.000850603	0.0247453	51869	Rif1
Timp3|Timp-3|-|10 C1|10 42.83 cM|protein-coding	173.247	112.86	185.278	146.769	153.006	162.067	103.276	149.258	103.604	85.8927	141.317	101.516	-0.446966	7.07718	11.1188	0.000854567	0.024809	21859	Timp3
Cysltr1|BB147369|CysLT1R|Cyslt1|-|X|X D|protein-coding	1.21803	1.05723	1.01889	1.3037	1.05911	1.32152	0.194676	0.736874	0.751843	0.604405	0.772929	0.537437	-0.916573	0.0501552	11.1085	0.000859325	0.0248955	58861	Cysltr1
Iqgap1|AA682088|D7Ertd237e|D7Ertd257e|mKIAA0051|-|7 D3|7 45.68 cM|protein-coding	39.5503	37.0031	52.0708	39.3169	45.7535	41.9884	34.5551	32.9956	29.8482	25.9223	40.45	33.2614	-0.377688	5.24432	11.0995	0.000863522	0.0249654	29875	Iqgap1
Krt12|AI835216|K12|Krt-12|Krt1-12|-|11 D|11 62.92 cM|protein-coding	1.07474	0.616719	1.4479	1.23508	0.635465	1.02118	1.2654	5.24	1.95479	1.61175	0.966162	2.98576	1.19184	0.847567	11.0887	0.000868547	0.0250589	268482	Krt12
Atp5o|ATPO|D12Wsu28e|OSCP|-|16|16 C4|protein-coding	55.9579	59.9099	59.9002	71.7721	59.8749	66.4966	68.8181	69.6756	74.2821	101.406	77.937	80.3768	0.338516	6.1434	11.0663	0.000879133	0.0252496	28080	Atp5o
Grm4|Gprc1d|mGluR4|-|17|17 A3.3|protein-coding	13.5417	18.4135	15.4979	17.3598	13.9802	15.3176	18.1049	88.5887	24.8108	18.4679	17.3909	25.0207	1.03072	4.57896	11.0632	0.000880569	0.0252496	268934	Grm4
Sos1|4430401P03Rik|9630010N06|AI449023|-|17 E3|17 50.67 cM|protein-coding	105.611	98.9394	106.447	89.3378	109.018	101.817	89.9405	78.9274	87.2137	62.5895	85.5375	86.1691	-0.318376	6.52269	11.0546	0.000884698	0.0253161	20662	Sos1
Cldn10|6720456I16Rik|Cldn10a|Cldn10b|D14Ertd728e|-|14 E4|14 62.55 cM|protein-coding	21.4231	27.6643	25.7941	26.1426	22.4531	24.5082	37.0859	31.5219	29.8482	35.8614	25.8931	29.9771	0.359999	4.82175	11.0451	0.000889204	0.0253931	58187	Cldn10
Foxc1|FREAC3|Fkh1|Mf1|Mf4|ch|fkh-1|frkhda|-|13 A3.2|13 13.52 cM|protein-coding	10.8907	7.22442	10.2962	10.0179	8.33165	10.7524	5.06159	6.38625	5.86437	5.37249	9.72603	6.32982	-0.566555	3.03884	11.0173	0.000902656	0.0257248	17300	Foxc1
Polr1d|1110003G10Rik|AC19|RPA16|Rpo1-3|-|5|5 G3|protein-coding	13.3267	14.7132	13.7819	16.8109	12.7799	15.5579	19.565	17.03	17.8939	22.0272	19.2588	17.3174	0.37875	4.07021	10.9934	0.000914382	0.0259007	20018	Polr1d
Cbl|4732447J05Rik|Cbl-2|c-Cbl|cbl|-|9 A5.1-A5.2|9 24.72 cM|protein-coding	36.541	38.3247	33.3017	18.046	36.7864	26.8509	29.9802	18.8312	21.7283	5.23818	13.5263	13.4957	-0.88814	4.61284	10.9797	0.000921178	0.0259882	12402	Cbl
Palm|-|-|10 C1|10 39.72 cM|protein-coding	178.836	187.835	160.931	189.997	183.226	188.137	219.303	279.767	205.103	240.285	196.711	210.974	0.312252	7.6691	10.9796	0.000921185	0.0259882	18483	Palm
Creld2|5730592L21Rik|C85758|-|15|15 E3|protein-coding	12.5386	9.6913	12.8702	12.7625	11.6502	12.6145	17.8129	19.2406	14.0595	17.5278	18.2283	11.8236	0.445131	3.84312	10.9523	0.000934883	0.0262161	76737	Creld2
BC002163|-|-|16|16 B4|pseudo	23.7158	28.0167	29.387	30.4654	23.5828	25.4093	31.8296	33.7325	33.5322	46.6064	31.4969	32.0074	0.382075	4.95193	10.9593	0.000931334	0.0262161	170658	BC002163
Lfng|AW061165|-|5 G2|5 79.15 cM|protein-coding	11.5355	10.7485	9.38454	10.2238	10.238	10.452	13.4327	17.9306	14.285	14.8415	11.5295	12.0625	0.424516	3.62333	10.9548	0.000933592	0.0262161	16848	Lfng
Fcho1|3322402E17Rik|N28152|-|8|8 B3.3|protein-coding	77.0227	84.6667	74.7546	77.4673	83.8108	83.7364	99.7717	164.077	99.168	97.5107	87.5343	94.4098	0.415752	6.5507	10.9231	0.000949746	0.0265796	74015	Fcho1
Zbtb40|BC059177|C230087D24|Gm571|mKIAA0478|-|4|4 D3|protein-coding	14.903	13.2154	15.4443	14.4779	16.2397	14.9572	22.3878	24.89	18.4953	16.2518	20.0318	16.7203	0.405785	4.12388	10.9047	0.000959192	0.0267904	230848	Zbtb40
Pgm5|4833423B07|9530034F03Rik|D830025G17|aciculin|-|19|19 B|protein-coding	16.2643	12.6868	12.0658	11.5275	10.5911	13.6958	8.76044	8.59687	10.601	7.38717	11.4651	8.71843	-0.466291	3.48375	10.8928	0.000965364	0.0268555	226041	Pgm5
Guk1|AA409738|AL033299|AL033300|AV026611|Gmk|Guk-1|-|11|11 B1.3|protein-coding	50.0827	57.0906	53.8941	57.2942	49.2132	53.5216	78.2599	65.0087	61.6511	81.0575	57.0035	61.2679	0.331267	5.92	10.8961	0.000963678	0.0268555	14923	Guk1
Kcnt2|E330038N15Rik|Slick|-|1|1 F|protein-coding	35.3946	32.9504	30.8885	28.0639	34.3857	33.2183	27.06	20.7144	29.0963	14.3043	25.4423	26.0359	-0.450883	4.82134	10.8844	0.000969792	0.0269252	240776	Kcnt2
Angpt2|Agpt2|Ang-2|Ang2|-|8 A1.3|8 10.3 cM|protein-coding	3.86905	1.05723	2.78855	2.47017	2.25943	2.3427	1.07072	1.31	0.977395	0.671561	2.18997	1.37345	-0.954626	1.03154	10.874	0.000975259	0.0269821	11601	Angpt2
Rnf166|1110031E24Rik|AW555115|Zfp313l|-|8|8 E1|protein-coding	22.6411	22.7305	24.0244	26.7602	21.041	23.4871	25.7946	44.0487	28.4197	32.2349	27.439	28.8425	0.407715	4.77665	10.8731	0.000975699	0.0269821	68718	Rnf166
Dgkh|5930402B05Rik|D130015C16|DGK|-|14|14 D3|protein-coding	12.037	8.45786	5.30897	3.63664	7.41376	4.20484	3.99087	4.66687	5.2629	2.7534	2.57643	2.56776	-0.913884	2.41572	10.8546	0.000985513	0.0271998	380921	Dgkh
Dcdc2a|AW492955|Dcdc2|RU2|-|13|13 A3.1|protein-coding	17.8406	15.8585	16.3023	16.605	13.4154	18.1409	13.6273	11.4625	14.1346	11.0808	13.1398	11.8833	-0.385254	3.86883	10.8447	0.000990802	0.0272919	195208	Dcdc2a
Rps26|-|-|10|10 D3|protein-coding	36.8993	34.8006	46.2792	40.5519	28.949	37.5432	49.1558	49.2068	46.5391	69.9095	42.6399	44.1296	0.420959	5.4602	10.8277	0.000999929	0.0274353	27370	Rps26
Hectd2|4921524L07|A630025O09Rik|AW212605|-|19|19 C2|protein-coding	60.4718	62.7291	57.9696	56.1277	54.8618	57.6664	45.6516	28.0012	54.5086	36.8687	49.1454	48.3694	-0.412943	5.67782	10.8299	0.000998718	0.0274353	226098	Hectd2
Rpl23|2810009A01Rik|-|11 D|11 61.1 cM|protein-coding	13.8283	15.418	15.9269	18.046	13.4154	14.717	17.0342	24.235	20.0742	27.4669	17.9062	17.4966	0.443291	4.17739	10.8237	0.00100208	0.0274404	65019	Rpl23
Chchd10|1620401E04Rik|AI267078|Ndg2|-|10|10 C1|protein-coding	59.9702	70.5703	65.799	83.3682	76.9619	72.6837	90.1352	107.666	79.9209	110.136	78.3235	83.0639	0.354994	6.3516	10.818	0.00100516	0.027471	103172	Chchd10
Col13a1|-|-|10 32.29 cM|10 B4|protein-coding	2.07782	0.792925	1.6624	1.57816	1.9064	1.74201	1.07072	0.736874	1.05258	0.738717	1.28822	0.477722	-0.885598	0.501811	10.8134	0.0010077	0.0274867	12817	Col13a1
Ndufv3|1500032D16Rik|-|17|17 B1|protein-coding	46.8585	51.2758	48.2633	50.5699	47.5187	46.1331	55.7748	56.4118	53.3056	82.5349	58.485	62.8205	0.347428	5.78495	10.8087	0.00101022	0.0275019	78330	Ndufv3
Tmem158|2310037P21Rik|Ris1|-|9|9 F4|protein-coding	24.5756	35.7697	25.9013	30.6713	26.6189	29.9745	37.9619	103.408	41.2762	41.7711	31.1748	32.9628	0.733345	5.26831	10.7981	0.00101605	0.0275566	72309	Tmem158
Slfn8|-|-|11|11 C|protein-coding	1.71958	0.881027	1.6624	1.3037	1.27093	2.28263	0.681367	0.900624	0.300737	1.0745	1.2238	0.358292	-1.01192	0.385968	10.7979	0.00101617	0.0275566	276950	Slfn8
Six3|E130112M24Rik|Six3a|Six3alpha|Six3b|Six3beta|-|17 E4|17 55.42 cM|protein-coding	1.79123	3.96462	1.28702	0.411695	1.83579	0.600692	1.16806	48.9612	6.08993	1.54459	2.25438	0.537437	2.61292	2.52581	10.7428	0.00104685	0.0283338	20473	Six3
Cntnap5b|C230078M14Rik|Caspr5-2|-|1|1 E1.1|protein-coding	14.5448	15.8585	14.1572	8.64559	16.5221	12.0138	8.27375	6.46812	11.8791	3.08918	8.30899	10.5696	-0.748439	3.46097	10.7388	0.0010491	0.0283399	241175	Cntnap5b
Nptx2|Narp|np2|-|5 G2|5 84.58 cM|protein-coding	25.5071	30.6598	23.7563	33.8962	33.3266	28.4728	47.3064	55.1837	36.6899	33.1751	33.1716	33.6794	0.444077	5.1138	10.7352	0.00105117	0.0283411	53324	Nptx2
Lingo2|B230217C06Rik|Lern3|Lrrn6c|-|4|4 A5|protein-coding	20.0617	18.1492	18.8227	18.1832	17.7224	18.261	9.24713	12.2812	12.8565	14.4386	15.6518	17.4966	-0.430506	4.02617	10.7245	0.00105724	0.02845	242384	Lingo2
Hmgn3|1110002A15Rik|6330514M13Rik|BB071015|TRIP7|-|9|9 E2|protein-coding	40.0518	36.3864	39.9513	42.2673	35.3036	40.9672	42.3421	43.1481	48.7194	59.769	49.4031	49.7428	0.32037	5.46472	10.7069	0.00106736	0.0286671	94353	Hmgn3
Ccdc106|BC018462|-|7|7 A1|protein-coding	24.7189	28.3691	24.2926	27.6522	25.9835	26.1301	27.8387	37.8262	33.9833	36.6672	30.0154	30.6936	0.328337	4.88933	10.6982	0.0010724	0.0287474	232821	Ccdc106
Anapc11|1110011I19Rik|R75218|-|11|11 E2|protein-coding	38.9771	42.1131	39.6296	46.8646	40.5286	41.1474	47.7931	51.8268	47.8924	68.2978	49.0166	49.3845	0.335187	5.55735	10.6883	0.00107816	0.0287718	66156	Anapc11
Rgs20|2900073E09Rik|Rgsz1|-|1|1 A1|protein-coding	12.037	13.5678	12.1195	11.4588	10.5205	10.7524	15.6715	35.37	14.5106	17.8635	13.5907	13.7345	0.650762	3.92294	10.6831	0.00108117	0.0287718	58175	Rgs20
Vtn|AI256434|Vn|-|11 B5|11 46.74 cM|protein-coding	80.6768	51.0996	66.0672	86.1815	58.8158	82.3549	53.6334	60.915	48.7946	57.1499	55.8441	46.2196	-0.399849	5.96548	10.683	0.00108124	0.0287718	22370	Vtn
Gypc|0610037F22Rik|Cd236r|-|18 B1|18 18.05 cM|protein-coding	3.36751	2.11447	2.52042	3.36218	2.18882	3.48401	1.36273	1.47375	2.10516	2.28331	1.73909	1.31374	-0.726109	1.28721	10.6727	0.00108731	0.0288703	71683	Gypc
9130024F11Rik|B530002L08|EG329160|-|1|1 C1.3|ncRNA	4.87213	5.19806	5.63072	6.5185	4.80129	6.4274	10.8045	11.3806	6.54103	7.05139	6.44108	8.30042	0.583111	2.82547	10.6441	0.00110424	0.0289694	329160	9130024F11Rik
Cystm1|0610010O12Rik|-|18|18 B2|protein-coding	9.09943	8.01735	9.06278	8.92006	8.40226	7.08816	10.0258	13.0181	10.7514	11.2822	10.499	11.107	0.397935	3.30764	10.6397	0.00110686	0.0289694	66060	Cystm1
Dync2h1|4432416O06Rik|AI448217|D030010H02Rik|D330044F14Rik|DHC1b|DHC2|Dnchc2|b2b414Clo|mKIAA1997|-|9 A1|9 2.46 cM|protein-coding	38.5472	34.6244	34.1061	27.4463	33.256	32.8578	26.8653	28.3287	26.0138	22.1615	26.8593	29.2605	-0.33217	4.91529	10.6457	0.00110326	0.0289694	110350	Dync2h1
Epop|AA409164|AI413509|AW539173|E13|E130012A19Rik|esPRC2p48|-|11|11 D|protein-coding	17.2674	21.5852	15.3906	27.5149	21.041	21.5048	31.0509	32.0131	23.5327	29.4815	23.3167	28.9619	0.437852	4.61364	10.6502	0.00110059	0.0289694	103551	Epop
Tmem170b|EG621976|-|13|13 A4|protein-coding	127.894	126.78	133.153	114.314	136.201	130.891	110.576	98.1681	114.28	76.9609	112.332	105.636	-0.31635	6.85486	10.6421	0.00110541	0.0289694	621976	Tmem170b
Hras|H-ras|Ha-ras|Harvey-ras|Hras-1|Hras1|Kras2|c-H-ras|c-Ha-ras|c-rasHa|ras|-|7 F5|7 86.48 cM|protein-coding	68.4248	74.0063	66.2817	82.339	63.9702	75.6872	82.4455	115.116	85.9356	109.599	78.0659	80.5559	0.357139	6.35725	10.6485	0.00110163	0.0289694	15461	Hras
Zfp382|5930415A09Rik|Znf382|-|7|7 B1|protein-coding	20.7782	18.0611	17.7502	17.7029	18.4991	16.6392	16.3528	15.3106	14.0595	5.30533	10.9498	9.85302	-0.613554	3.92745	10.6385	0.0011076	0.0289694	233060	Zfp382
Pcolce|Astt-2|Astt2|P14|PCPE-1|-|5 G2|5 76.59 cM|protein-coding	11.034	3.70031	9.75992	9.40037	11.5796	8.89024	2.62813	4.50312	3.00737	4.09652	10.2413	2.80662	-0.989467	2.81447	10.6556	0.00109739	0.0289694	18542	Pcolce
Gsg1l|AI852434|C230098I05Rik|G630023A01Rik|Gm637|g1l|-|7|7 F3|protein-coding	27.4416	32.0694	28.2609	29.2303	23.4416	28.8933	26.2813	121.666	38.2688	44.5917	32.9139	40.487	0.844814	5.30485	10.6318	0.00111161	0.0290201	269994	Gsg1l
Tagln3|2700038H05Rik|2900005O10Rik|AI426007|Np25|-|16|16 B5|protein-coding	112.776	127.397	113.312	136.957	122.009	119.958	125.372	154.334	147.812	201.133	147.565	143.854	0.329861	7.10692	10.5928	0.00113528	0.0294307	56370	Tagln3
Ptpn14|C130080N23Rik|OTTMUSG00000022087|PTP36|-|1 H6|1 95.03 cM|protein-coding	32.3854	24.4045	30.9422	21.3395	25.701	27.8721	21.2197	11.3806	19.7735	17.4606	25.3134	20.1838	-0.495319	4.54538	10.5908	0.0011365	0.0294307	19250	Ptpn14
Rreb1|1110037N09Rik|AA414966|B930013M22Rik|-|13|13 A3.3|protein-coding	295.624	285.189	275.155	206.877	259.411	250.549	170.537	173.084	258.709	160.839	233.296	199.867	-0.394382	7.85128	10.5886	0.00113786	0.0294307	68750	Rreb1
Rsf1|4832420A03Rik|C030033M12Rik|Gm164|Hbxap|XAP8|p325|-|7|7 E1|protein-coding	93.9319	94.0937	97.3311	84.1916	91.2246	97.1319	88.2858	78.4362	80.5224	59.0302	72.591	73.1512	-0.305436	6.39735	10.592	0.00113578	0.0294307	233532	Rsf1
Cox7c|COXVIIc|Cox7c1|-|13|13 C3|protein-coding	1.07474	3.87652	1.93053	1.44093	1.05911	2.52291	2.72547	3.43875	3.38329	5.70827	3.73583	3.34405	0.922825	1.57458	10.5836	0.00114093	0.0294558	12867	Cox7c
Nupl1|1700017F11Rik|Nup58|mKIAA0410|-|14|14 D1|protein-coding	38.4039	38.8533	43.3298	37.6015	42.0113	39.8859	34.1657	31.0306	34.8855	22.6316	32.3986	34.6349	-0.341081	5.16886	10.5666	0.00115148	0.0296563	71844	Nupl1
Arl5b|4930587A11Rik|AW146430|Arl8|-|2|2 A2|protein-coding	18.772	15.1537	17.8574	13.7232	18.6403	16.0385	13.238	8.43312	14.6609	5.37249	13.5907	10.8682	-0.600712	3.8093	10.5643	0.00115294	0.0296563	75869	Arl5b
Rnf19a|AA032313|Dorfin|Rnf19|UIP117|Ubce7ip2|XYbp|-|15|15 B3.1|protein-coding	65.5589	64.5793	64.2439	65.4595	67.0769	61.6911	51.8813	38.8906	57.14	48.2853	59.2579	55.5949	-0.319729	5.86958	10.5601	0.00115557	0.0296696	30945	Rnf19a
Bicd1|B830009D06Rik|bic-D 1|-|6|6 G3|protein-coding	73.297	63.6983	68.8557	64.9792	63.1935	71.4823	57.7216	52.3181	61.1248	37.3388	53.2033	57.5655	-0.346051	5.92006	10.5417	0.0011671	0.0298616	12121	Bicd1
Cacng3|-|-|7|7 F2|protein-coding	53.8084	53.0378	56.7362	56.1964	54.4382	55.4439	61.1284	122.731	62.2526	76.4237	60.4173	69.628	0.456558	6.02892	10.5414	0.00116732	0.0298616	54376	Cacng3
Cox17|AI037035|-|16|16 B3-B4|protein-coding	24.6473	28.3691	28.2609	29.9165	22.9474	28.0523	35.6258	39.0543	30.8255	50.5686	29.951	30.3951	0.415373	4.98504	10.5346	0.00117162	0.0299168	12856	Cox17
Ankrd26|5730521P14Rik|BC008111|mKIAA1074|-|6|6 F1|protein-coding	19.7035	19.4707	20.2706	16.3992	19.8406	19.6426	15.0874	17.03	15.5631	10.2077	15.1365	14.3914	-0.402844	4.0909	10.5175	0.0011825	0.0300304	232339	Ankrd26
Cox7b|1100001F07Rik|1110004F07Rik|C80563|-|X|X D|protein-coding	49.7961	57.7954	59.3639	61.4798	58.5334	61.8112	70.1808	64.9268	66.6884	95.6303	66.794	74.1066	0.330011	6.03862	10.5208	0.00118041	0.0300304	66142	Cox7b
Clrn1|A130002D11Rik|USH3|Ush3a|clarin-1|-|3|3 D|protein-coding	1.64793	2.20257	1.07252	2.12709	1.55336	2.04235	0.876044	0.736874	1.20295	1.00734	0.708519	1.31374	-0.830467	0.59944	10.5095	0.00118762	0.0301057	229320	Clrn1
Aff4|AF5Q31|Alf4|Laf4l|MCEF|-|11|11 B1.3|protein-coding	298.92	318.315	289.151	239.812	304.176	288.272	268.751	206.243	250.965	165.271	231.879	233.367	-0.358284	8.01154	10.499	0.00119441	0.0302232	93736	Aff4
Ndufb8|2900010I05Rik|AI987932|-|19|19 C3|protein-coding	67.6367	76.0327	77.7576	90.0926	75.8322	76.2278	93.1527	87.5243	88.943	115.844	89.9819	96.679	0.303788	6.43375	10.4734	0.00121103	0.0305885	67264	Ndufb8
Ctgf|Ccn2|Fisp12|Hcs24|fisp-12|-|10 A4|10 11.84 cM|protein-coding	14.4015	6.4315	28.3681	27.9266	16.5221	25.2891	4.76957	9.90687	7.89435	16.5876	10.6278	12.3013	-0.935808	3.94478	10.4539	0.00122392	0.0308581	14219	Ctgf
Zbtb26|A630026F21Rik|-|2|2 B|protein-coding	15.5478	13.8321	15.5515	13.5173	14.6863	14.1163	9.24713	12.5269	12.1047	8.79745	12.4957	11.2265	-0.392602	3.69705	10.4495	0.00122681	0.0308755	320633	Zbtb26
Syt14|B230320I09Rik|sytXIV|-|1|1 H6|protein-coding	39.407	43.699	42.7399	35.543	39.9637	36.3419	33.5817	31.3581	32.9307	23.3032	32.8495	34.2766	-0.336182	5.15548	10.445	0.0012298	0.0308952	329324	Syt14
Rab30|5033421K01Rik|AI323892|Rsb30|-|7|7 E1|protein-coding	13.7566	12.7749	12.8702	11.0471	12.4269	14.2965	11.0966	11.2987	10.3002	6.5813	9.66162	7.64355	-0.456714	3.49548	10.4372	0.00123499	0.0309286	75985	Rab30
Polr2j|14.5kDa|Polr2i|Rpb11a|Rpo2-4|-|5|5 G2|protein-coding	12.1803	12.3344	12.1731	15.1641	13.2036	12.4343	14.0167	14.0006	16.7661	21.6914	17.9706	18.5117	0.41528	3.9254	10.4364	0.00123555	0.0309286	20022	Polr2j
Hfm1|A330009G12Rik|Gm1046|Mer3|Sec63d1|-|5|5 E5|protein-coding	4.80049	3.70031	3.59294	3.0191	4.02461	3.9045	2.33612	2.86562	1.95479	2.61909	2.57643	2.80662	-0.595786	1.73843	10.4315	0.00123886	0.0309559	330149	Hfm1
Zcchc16|C230031A03Rik|Mar4|-|X|X F2|protein-coding	5.30203	5.10996	4.87996	4.52864	4.8719	4.6854	4.18554	2.12875	3.60884	2.55193	3.15613	4.00092	-0.580952	2.08084	10.4135	0.00125094	0.0310428	619287	Zcchc16
Dkkl1|AI414495|SGY|SGY-1|SGY1|Soggy|mSgy|-|7 B3|7 29.19 cM|protein-coding	0.931438	0.528616	0.911641	1.02924	1.12972	0.780899	1.65475	8.26937	0.902211	1.00734	1.35263	1.73174	1.46761	0.820312	10.4118	0.00125212	0.0310428	50722	Dkkl1
Rplp2|2700049I22Rik|-|7|7 F5|protein-coding	4.37059	4.93375	3.75382	6.17542	4.8719	6.06699	6.22965	7.61437	7.74398	7.52149	7.27842	6.68811	0.51634	2.63937	10.4099	0.00125342	0.0310428	67186	Rplp2
Dlgap3|BC058433|DAP-3|DAP3|Prpl8|Sapap3|-|4 D2.2|4 61.33 cM|protein-coding	193.166	243.604	154.818	203.789	233.639	237.574	299.996	414.778	263.37	244.65	246.564	248.475	0.4396	7.95862	10.4159	0.00124932	0.0310428	242667	Dlgap3
Atm|AI256621|C030026E19Rik|-|9 A5.3|9 29.12 cM|protein-coding	45.5688	38.0604	40.9166	31.1516	40.2461	35.1405	33.679	29.3931	34.4344	23.3032	30.5951	29.0216	-0.35886	5.10563	10.4159	0.00124934	0.0310428	11920	Atm
Asb11|1110067L12Rik|1600009D24Rik|-|X|X F5|protein-coding	1.00309	0.96913	0.965267	0.960621	0.917894	1.08125	1.55741	5.32187	1.95479	1.34312	1.09498	1.5526	1.10016	0.728761	10.4011	0.00125942	0.0311041	68854	Asb11
Cxx1a|1110012O05Rik|Mar8.2A/B|Mart8b|-|X|X A5|protein-coding	4.94378	5.46237	4.5582	7.54774	5.29554	5.88678	7.49504	10.0706	7.89435	10.2077	6.63431	7.0464	0.549845	2.81413	10.3578	0.00128927	0.0316097	66158	Cxx1a
Isca2|0710001C05Rik|5730594E03Rik|Hbld1|-|12|12 D1|protein-coding	15.5478	18.3254	17.2676	17.5656	16.9457	19.2822	21.4144	19.4862	22.2545	23.9076	23.5743	21.1392	0.329852	4.3119	10.357	0.00128987	0.0316097	74316	Isca2
Lamc3|AI562206|AW240805|-|2|2 B|protein-coding	19.7751	13.1273	16.7313	15.8503	17.5106	17.1197	13.6273	13.8369	9.5484	6.84993	14.4924	11.9431	-0.513992	3.84389	10.3344	0.00130574	0.0317761	23928	Lamc3
Prox1|A230003G05Rik|-|1 H6|1 95.85 cM|protein-coding	85.0474	69.8655	66.4962	44.463	79.5744	69.5601	26.0866	10.8894	58.343	29.8845	59.8376	42.6367	-0.864826	5.74878	10.3402	0.00130166	0.0317761	19130	Prox1
Ston1|4921524J06Rik|C86231|Salf|Sblf|-|17|17 E4|protein-coding	8.52624	5.55047	9.27729	5.96958	7.13133	9.01038	5.84029	4.50312	5.78919	4.63377	5.47492	5.19523	-0.54166	2.72016	10.3356	0.00130489	0.0317761	77057	Ston1
Mien1|1810046J19Rik|AI463380|Rdx12|-|11|11 D|protein-coding	27.2266	29.162	26.1695	30.8771	28.6665	28.2926	33.4843	37.0075	33.3818	41.6368	33.9445	31.2311	0.307184	4.9945	10.3229	0.00131392	0.0319197	103742	Mien1
Mib1|DIP-1|E430019M12Rik|Mib|mKIAA1323|-|18|18 A1|protein-coding	97.2994	103.433	94.2744	66.2829	97.5792	85.8389	85.2683	64.2718	70.5228	27.2654	62.3496	56.4309	-0.574209	6.24807	10.3089	0.00132392	0.0321068	225164	Mib1
C1qtnf4|0710001E10Rik|9430004J15Rik|CTRP4|-|2|2 E1|protein-coding	58.3223	79.8211	44.1878	77.0556	78.6565	79.5917	85.4629	99.7237	90.8978	105.569	80.1914	93.0364	0.411003	6.34244	10.2935	0.00133503	0.0323201	67445	C1qtnf4
Gabpb2|1810015F01Rik|5830427M07|9430006E19Rik|A430024B14Rik|AV050852|Gabpb2-1|-|3 F2.1|3 40.74 cM|protein-coding	51.0858	48.1041	48.746	36.435	44.4826	45.8328	38.3513	41.265	39.5469	26.7953	35.8768	32.4851	-0.360059	5.35347	10.2828	0.00134277	0.0324238	213054	Gabpb2
Dab2|5730435J12Rik|AA960054|AI957090|D15Wsu122e|D630005B22Rik|Doc-2|Doc2|p96|-|15 A1|15 2.15 cM|protein-coding	25.5787	10.9247	21.7185	16.4678	18.2873	19.4624	12.7513	10.2344	12.5558	8.05874	18.2927	11.8833	-0.609155	3.97483	10.2807	0.00134431	0.0324238	13132	Dab2
Ctsz|AI787083|AU019819|CTSX|D2Wsu143e|-|2 H4|2 97.94 cM|protein-coding	33.1735	30.7479	33.4626	34.0334	31.279	30.2749	40.6874	49.78	36.0133	43.45	39.0329	33.2017	0.325352	5.18479	10.2658	0.00135516	0.0325821	64138	Ctsz
Rbm12|5730420G12Rik|9430070C08Rik|AI852903|SWAN|mKIAA0765|-|2|2 H1|protein-coding	28.7313	29.7787	25.955	26.3485	29.3726	26.1902	23.2638	21.8606	22.4049	16.789	23.5743	23.9458	-0.334392	4.64321	10.2359	0.00137731	0.0330577	75710	Rbm12
Rasd2|4930526B11Rik|AU045414|Rhes|TEM-2|TEM2|-|8|8 C1|protein-coding	58.179	62.1124	55.0738	57.9118	60.5104	57.4862	78.4546	359.431	84.4319	62.8581	68.5331	69.628	1.04175	6.48433	10.2243	0.00138601	0.0332097	75141	Rasd2
Thoc2|6330441O12Rik|D130005M13Rik|Gm1139|Gm1793|Tho2|-|X|X A4|protein-coding	88.9165	73.3896	82.5839	75.0657	75.4085	74.0052	58.2082	73.0324	67.3651	49.9642	67.0516	63.7759	-0.307322	6.14747	10.1873	0.00141408	0.0337665	331401	Thoc2
Timm13|D10Ertd378e|Tim9|Timm9|-|10 C1|10 39.72 cM|protein-coding	26.4385	28.5453	25.0433	33.0042	31.632	28.8933	38.1566	31.6037	35.2614	49.6955	33.3004	35.65	0.367071	5.05425	10.1795	0.00142009	0.0337949	30055	Timm13
Ptgis|Cyp8|Cyp8a1|Pgis|-|2|2 H3|protein-coding	2.14947	0.792925	3.91469	3.22494	4.30704	2.88332	0.681367	0.245625	1.05258	0.940186	3.09172	0.716583	-1.34097	1.14822	10.1795	0.00142009	0.0337949	19223	Ptgis
Lcor|3110023F06Rik|A630025C20Rik|Mlr2|mKIAA1795|-|19|19 C3|protein-coding	4.58554	5.19806	5.36259	3.0191	5.57797	3.78436	3.79619	2.9475	3.45848	0.470093	1.61027	1.25402	-1.0425	1.82308	10.1351	0.00145475	0.0345045	212391	Lcor
Lzts3|Prosapip1|-|2|2 F1|protein-coding	217.813	236.996	200.454	225.334	223.825	238.114	248.699	414.942	273.22	273.124	263.376	257.97	0.366898	8.00145	10.1349	0.00145485	0.0345045	241638	Lzts3
Vgll3|1700110N18Rik|4832416J22|C80713|Vgl-3|Vito-2|-|16|16 C1.3|protein-coding	5.73192	3.52411	9.59904	7.13605	9.81441	12.5545	0.584029	0.818749	5.2629	2.61909	7.34283	2.09003	-1.36043	2.5528	10.1218	0.0014653	0.0346935	73569	Vgll3
Pdgfra|AI115593|CD140a|Pdgfr-2|-|5 C3.3|5 39.55 cM|protein-coding	86.1938	70.7465	85.4797	68.2727	71.0309	77.1889	64.2432	72.7868	60.0722	52.1132	64.1531	58.6404	-0.304653	6.11679	10.1144	0.00147116	0.0347736	18595	Pdgfra
Tnfsf13|2310026N09Rik|April|Tall2|Tnlg7b|Trdl1|-|11|11 B3|protein-coding	4.44224	3.61221	3.48569	3.36218	3.10672	5.04581	2.62813	2.45625	2.78182	2.61909	2.70525	1.9706	-0.610992	1.73856	10.1087	0.0014757	0.0348219	69583	Tnfsf13
Pcsk1n|AI848336|KEP|PEN|PEN19|PEN20|Pan3|SAAS|SAASCT|bLEN|lLEN|proSAAS|-|X|X A1.1|protein-coding	307.518	408.004	236.598	410.391	393.635	392.312	475.01	464.64	426.971	590.37	430.2	471.751	0.412379	8.70523	10.1019	0.00148116	0.0348335	30052	Pcsk1n
Slc22a8|Oat3|Roct|-|19|19 A|protein-coding	35.323	19.9112	28.7435	26.4171	20.0525	33.6387	20.2463	23.4162	19.7735	19.4753	20.8047	16.1231	-0.457139	4.57507	10.0975	0.00148467	0.0348573	19879	Slc22a8
Des|-|-|1 C4|1 38.85 cM|protein-coding	3.43915	1.67395	3.59294	3.97972	2.75368	3.24374	0.584029	2.86562	1.35332	1.88037	2.18997	1.37345	-0.861032	1.37713	10.0846	0.00149515	0.034986	13346	Des
Trim65|4732463G12Rik|-|11|11 E2|protein-coding	4.51389	5.63857	3.59294	3.84249	3.74218	3.24374	3.01748	2.2925	2.93219	2.7534	2.83407	2.14975	-0.612168	1.80747	10.0854	0.00149445	0.034986	338364	Trim65
Gpx1|AI195024|AL033363|CGPx|GPx-1|GSHPx-1|Gpx|-|9 F2|9 59.24 cM|protein-coding	37.5441	34.4482	35.4467	41.444	33.7503	36.6422	42.6341	79.5006	44.3587	59.2317	39.0973	39.4718	0.47174	5.45059	10.0767	0.00150154	0.0350769	14775	Gpx1
ENSMUST00000082395.1	5.58863	5.55047	5.52347	4.94034	3.60097	6.12706	7.88439	6.14062	7.29287	10.4092	10.3701	5.4938	0.602413	2.74639	10.0735	0.0015042	0.0350805	ENSMUST00000082395.1	ENSMUST00000082395.1
Ndufb3|2700033I16Rik|CI-B12|-|1|1 C1.3|protein-coding	35.323	45.1967	37.699	45.6981	31.3496	43.6102	48.7664	46.7506	50.9749	70.4468	45.7317	49.1457	0.385459	5.52418	10.061	0.0015144	0.0352516	66495	Ndufb3
Scn2a|6430408L10|A230052E19Rik|Nav1.2|Scn2a1|-|2 C1.3|2 38.61 cM|protein-coding	434.695	438.664	435.335	367.987	419.689	394.114	371.053	313.745	358.403	257.745	328.946	366.891	-0.318826	8.5472	10.0531	0.00152091	0.0352937	110876	Scn2a
Plin4|S3-12|mKIAA1881|-|17|17 D|protein-coding	5.08708	3.61221	7.45401	4.39141	6.63708	5.34616	2.72547	4.33937	3.60884	2.82056	3.99347	3.5232	-0.635478	2.21822	10.0474	0.00152566	0.0353454	57435	Plin4
Tnnc1|AI874626|TnC|cTnC|cTnI|tncc|-|14 B|14 19.09 cM|protein-coding	0.71649	0.881027	1.07252	1.37232	0.988501	1.26145	1.36273	6.05875	1.05258	2.21615	1.48145	1.91089	1.14365	0.855265	10.0271	0.00154252	0.0356769	21924	Tnnc1
Pcp4|P16Rimb19|Pcp-4|Pep19|-|16 C4|16 56.97 cM|protein-coding	61.5465	80.614	64.5656	70.5371	61.4283	62.2317	48.8638	358.776	110.671	114.098	78.8388	83.0042	0.986186	6.63861	9.97048	0.0015907	0.0359305	18546	Pcp4
Nynrin|AA409373|C80530|mKIAA1305|-|14|14 C3|protein-coding	18.987	16.2109	17.5357	15.6444	18.4991	20.1832	10.7072	15.1469	12.255	10.6107	16.1671	15.2871	-0.413961	3.98033	9.98179	0.00158096	0.0359305	277154	Nynrin
Shprh|2610103K11Rik|AA450458|AU024614|BC006883|D230017O13Rik|E130018M05|-|10|10 A1|protein-coding	58.4656	56.9144	63.3859	53.1086	57.4743	61.2105	52.952	44.6218	49.4712	32.2349	47.7284	50.0414	-0.341139	5.71292	9.97447	0.00158726	0.0359305	268281	Shprh
Tmod2|N-Tmod|NTMOD|-|9 D|9 42.31 cM|protein-coding	824.179	840.5	837.905	695.215	823.916	803.005	746.973	541.685	689.289	483.658	622.595	679.679	-0.358296	9.48353	9.96601	0.00159457	0.0359305	50876	Tmod2
Podxl|AW121214|Ly102|PC|PCLP-1|Pclp1|-|6 A3.3|6 12.57 cM|protein-coding	45.7121	38.9414	50.8374	45.4237	49.9899	53.7619	34.4577	48.9612	31.2015	30.6904	38.4532	37.3818	-0.366178	5.40343	9.9806	0.00158198	0.0359305	27205	Podxl
Snhg8|1110065M07Rik|2010109N14Rik|-|3|3 G1|ncRNA	14.4731	17.973	12.763	13.1742	9.32016	12.3743	15.9635	18.5856	17.969	23.1689	17.6486	15.944	0.453819	3.99008	10.007	0.0015595	0.0359305	69895	Snhg8
Mc4r|Mc4-r|-|18|18 E1|protein-coding	8.52624	8.98648	6.54236	8.16528	6.28404	8.40969	6.32698	2.9475	6.08993	5.9769	5.53933	4.83694	-0.561574	2.74243	9.97724	0.00158487	0.0359305	17202	Mc4r
Exoc4|C78892|Sec8|Sec8l1|-|6 A3.3|6 14.59 cM|protein-coding	69.1413	68.7201	60.0074	50.8443	65.6647	61.3907	50.3239	46.9143	51.426	37.5403	56.1018	54.102	-0.341216	5.81144	9.98168	0.00158106	0.0359305	20336	Exoc4
Fam129a|AI256368|AU019833|Niban|-|1|1 G1|protein-coding	2.14947	1.67395	3.53931	1.98986	2.47125	2.22256	1.46007	1.06437	1.65405	0.738717	2.06115	1.07487	-0.816112	1.01091	9.99096	0.00157311	0.0359305	63913	Fam129a
Ccnd2|2600016F06Rik|AI256817|BF642806|C86853|Vin-1|Vin1|cD2|-|6 F3|6 61.92 cM|protein-coding	122.09	113.829	132.51	103.679	144.745	120.319	105.125	76.2256	109.393	76.8938	112.075	95.9027	-0.357158	6.7756	9.99894	0.0015663	0.0359305	12444	Ccnd2
Appbp2|1300003O07Rik|AI465480|PAT1|-|11|11 C|protein-coding	41.1266	44.7562	42.7399	31.6319	44.9768	41.0273	34.3604	31.0306	33.457	20.214	31.6257	36.2472	-0.397962	5.17961	9.96797	0.00159287	0.0359305	66884	Appbp2
Bin2|-|-|15|15 F1|protein-coding	7.37985	8.01735	7.93664	7.27328	8.40226	7.56872	11.2912	11.7081	9.39803	10.6107	9.46838	9.07672	0.39661	3.18883	9.98756	0.00157601	0.0359305	668218	Bin2
Kbtbd8|AU040152|SSEC-51|SSEC51|Takrp|mKIAA1842|-|6|6 D2|protein-coding	10.1025	11.2771	12.8702	9.1259	9.32016	9.61107	6.91101	6.8775	9.39803	6.71561	8.50222	7.28526	-0.446486	3.19609	10.0018	0.00156389	0.0359305	243574	Kbtbd8
Smdt1|1500032L24Rik|Emre|-|15|15 E1|protein-coding	61.8331	61.4076	61.2944	70.7429	60.6516	64.6945	82.1534	87.6881	69.9214	96.3691	65.8922	70.9417	0.312519	6.15474	9.93959	0.00161761	0.0363327	69029	Smdt1
Slc12a7|AA408796|D13Ertd261e|Kcc4|-|13 C1|13 40.15 cM|protein-coding	10.3175	6.6077	9.33091	7.47912	9.24955	9.49093	5.06159	5.895	4.2855	5.30533	9.27515	5.19523	-0.580889	2.90303	9.9172	0.00163741	0.0367185	20499	Slc12a7
Med13|1110067M05Rik|D030023K18|Thrap1|Trap240|-|11|11 C|protein-coding	140.79	130.744	131.813	104.639	122.715	118.937	109.603	112.005	107.288	80.3859	99.1282	98.4108	-0.305623	6.82236	9.87101	0.00167903	0.0374716	327987	Med13
Angptl2|AI593246|AW260363|Arp2|-|2|2 B|protein-coding	7.02161	2.90739	8.6874	4.94034	7.90801	5.94685	2.33612	2.78375	1.35332	1.41028	7.53606	1.67203	-1.1261	2.25352	9.87256	0.00167762	0.0374716	26360	Angptl2
Tnpo1|AU021749|D13Ertd688e|IPO2|Kpnb2|MIP|MIP1|TRN|-|13 D1|13 52.24 cM|protein-coding	50.5842	46.7826	52.9824	37.5329	50.1311	47.8151	39.422	42.4931	35.6373	15.2444	35.3615	30.2756	-0.528548	5.33954	9.86757	0.00168217	0.0374819	238799	Tnpo1
Uhmk1|4732477C12Rik|4930500M09Rik|AA673513|AI449218|AU021979|C820018A03Rik|KIS|Kist|OTTMUSG00000021542|P-CIP2|-|1|1 H3|protein-coding	65.6305	75.2397	62.1525	46.4529	70.8191	64.8147	61.0311	35.6975	48.4187	15.5131	42.3179	43.5921	-0.644215	5.72106	9.8572	0.00169168	0.0376339	16589	Uhmk1
Ccdc124|1810023B24Rik|-|8|8 B3.3|protein-coding	36.3977	35.5054	36.1439	48.9917	42.5762	40.6668	51.0052	47.4056	47.8924	65.2086	45.152	48.3097	0.343749	5.50997	9.85095	0.00169744	0.037702	234388	Ccdc124
Steap3|1010001D01Rik|Tsap6|pHyde|-|1|1 E2.3|protein-coding	6.37676	3.70031	4.87996	5.6265	6.14283	5.4663	3.99087	3.275	3.00737	3.15634	5.08845	2.3289	-0.63243	2.19454	9.84766	0.00170048	0.0377098	68428	Steap3
Zic4|-|-|9 E3.2|9 48.26 cM|protein-coding	7.09326	11.4534	6.75687	5.2148	4.66008	5.70657	1.84943	5.895	5.18771	1.88037	4.57317	2.50804	-0.894931	2.41982	9.83759	0.00170982	0.0378568	22774	Zic4
Kctd1|4933402K10Rik|AI661543|AW553000|-|18|18 A1|protein-coding	62.1197	64.8436	65.3164	64.9106	59.1689	63.1928	87.4097	115.116	73.2295	75.1477	67.4381	69.1503	0.35955	6.17668	9.8299	0.00171698	0.0379552	106931	Kctd1
Zfp385a|Hzf|Zfp385|Znf385a|-|15|15 F3|protein-coding	43.0611	50.3067	37.5382	46.3843	47.8717	49.5571	53.536	68.6931	50.8246	57.8214	53.0101	57.6252	0.315141	5.68547	9.80939	0.00173623	0.0382599	29813	Zfp385a
Tmem11|5730466P16Rik|AA409091|-|11|11 B2|protein-coding	21.4947	19.9993	22.4156	24.5645	18.3579	22.586	26.5733	24.3169	26.54	35.0555	24.6693	28.1856	0.353093	4.62694	9.81007	0.00173558	0.0382599	216821	Tmem11
Ssh2|SSH-2|SSH-2L|mSSH-2L|-|11|11 B5|protein-coding	73.2253	74.5349	73.6284	53.3831	70.6778	68.2987	65.606	50.8443	59.5459	39.8236	56.0374	50.9371	-0.359532	5.94267	9.7928	0.00175196	0.0385459	237860	Ssh2
Pcdhb16|Pcdhb8|PcdhbP|-|18|18 B3|protein-coding	12.6819	14.1845	12.4412	8.57698	11.7914	10.9927	9.44181	9.25187	10.9769	4.49946	6.44108	7.28526	-0.566343	3.3215	9.78613	0.00175833	0.0386253	93887	Pcdhb16
Evl|AI528774|-|12|12 F1|protein-coding	89.5613	97.4416	85.4261	100.659	93.7664	92.1461	106.683	138.614	102.1	132.835	101.318	107.01	0.300975	6.70152	9.78087	0.00176337	0.0386752	14026	Evl
Wnt7a|AI849442|Wnt-7a|px|tw|-|6 D1|6 40.45 cM|protein-coding	12.1087	12.2463	11.5832	13.7232	13.839	14.1163	17.5209	14.4919	17.5931	19.5424	16.5536	14.4511	0.366639	3.90082	9.76685	0.00177686	0.0388495	22421	Wnt7a
Xpo4|B430309A01Rik|mKIAA1721|-|14|14 C3|protein-coding	7.1649	7.31253	7.34675	4.18556	6.56647	6.54754	5.45094	4.9125	4.88698	1.88037	3.41377	4.06064	-0.679521	2.44384	9.76933	0.00177447	0.0388495	57258	Xpo4
Tmem191c|4933405M22Rik|D16Bwg1494e|MNCb-4137|-|16 A3|16 10.71 cM|protein-coding	63.6244	60.2623	55.4492	69.3706	61.3577	65.7758	76.6052	88.8343	76.6128	94.8916	63.6379	68.1351	0.318138	6.13937	9.76311	0.00178049	0.038856	224019	Tmem191c
Npr3|ANP-C|ANPR-C|EF-2|NPR-C|lgj|stri|-|15 A1|15 5.83 cM|protein-coding	32.9586	27.9286	39.1469	34.9941	41.4464	41.0873	29.0068	10.5619	26.9912	21.3557	32.5919	26.0359	-0.570201	4.93278	9.76081	0.00178272	0.038856	18162	Npr3
Cecr2|2610101O16Rik|2810409N01Rik|Gtl4|mKIAA1740|-|6 F1|6 56.97 cM|protein-coding	17.4107	15.3299	15.6588	10.9099	15.463	14.1163	11.2912	5.81312	12.0295	10.4764	12.1092	11.3459	-0.491792	3.68117	9.71634	0.00182637	0.0396224	330409	Cecr2
Zfp933|2810408P10Rik|-|4|4 E1|protein-coding	18.6288	13.9202	16.0342	12.9684	16.0985	15.5579	11.8753	11.3806	13.6835	8.93177	13.011	11.7042	-0.402682	3.78736	9.71163	0.00183106	0.0396625	242747	Zfp933
Ndufa3|1010001M12Rik|1700022J01Rik|-|7|7 A1|protein-coding	34.6781	39.2057	42.7399	46.6588	41.3052	37.363	49.3505	45.9318	48.569	65.2758	44.1858	51.2357	0.332131	5.5135	9.69923	0.00184345	0.0396649	66091	Ndufa3
Ppp1ca|Ppp1c|dism2|-|19|19 A|protein-coding	133.339	131.537	139.696	150.063	136.837	138.279	151.556	227.285	162.699	185.015	146.47	160.276	0.316198	7.27963	9.69735	0.00184534	0.0396649	19045	Ppp1ca
2410006H16Rik|-|-|11|11 B2|ncRNA	10.1025	11.982	12.0658	12.9684	10.8029	12.5545	12.8486	14.4919	14.8113	21.2213	13.2042	18.034	0.428086	3.79833	9.70174	0.00184094	0.0396649	69221	2410006H16Rik
Fbn1|AI536462|B430209H23|Fib-1|Tsk|-|2 F1|2 61.38 cM|protein-coding	26.6534	20.7922	24.7752	16.7423	25.2774	23.5471	20.0517	7.04125	16.5405	13.2969	19.6453	16.0037	-0.574093	4.27559	9.66486	0.00187826	0.0403106	14118	Fbn1
Satb2|mKIAA1034|-|1|1 C1.3|protein-coding	23.2859	24.052	27.8855	29.1617	25.1362	23.3669	48.6691	49.8618	25.713	26.9296	24.7982	43.7116	0.520308	4.95981	9.64557	0.00189809	0.0406115	212712	Satb2
Mecp2|1500041B07Rik|D630021H01Rik|Mbd5|WBP10|-|X A7.3|X 37.63 cM|protein-coding	209.072	219.816	202.277	167.697	208.786	196.727	187.863	177.341	167.21	127.597	153.04	161.888	-0.305388	7.50566	9.64699	0.00189662	0.0406115	17257	Mecp2
Mospd3|1190005J19Rik|5133401H10Rik|Gtig2|R124|-|5 G2|5 76.59 cM|protein-coding	9.67262	13.1273	9.75992	11.1158	12.2151	10.5121	14.8927	14.5737	14.3602	16.8562	13.4619	12.1819	0.381645	3.68132	9.62326	0.00192129	0.0409168	68929	Mospd3
Bend4|D330027G24Rik|EG666938|-|5 C3.1|5|protein-coding	27.0117	27.4881	26.7057	23.6038	23.2298	28.1724	21.7064	19.8137	23.683	17.6621	20.3538	21.9155	-0.320894	4.56036	9.62062	0.00192405	0.0409168	666938	Bend4
Psd3|4931420C21Rik|AI661273|BC003498|D430018P08|EFA6D|-|8|8 B3.2-B3.3|protein-coding	840.73	841.469	890.459	748.53	856.466	830.036	817.349	576.481	668.163	530.735	649.776	708.104	-0.342183	9.54432	9.61733	0.0019275	0.040928	234353	Psd3
Itga4|CD49D|Itga4B|-|2 C3|2 47.38 cM|protein-coding	49.7244	50.9234	49.4967	40.2775	47.9423	49.1366	46.1383	16.375	39.9228	27.8026	35.8768	36.0083	-0.508912	5.35569	9.58647	0.00196017	0.0415585	16401	Itga4
Clec2l|AI414054|AW122724|Gm1064|-|6|6 B1|protein-coding	27.9431	25.9903	23.7563	34.3079	27.6074	28.1124	36.0151	27.6737	32.5548	43.9201	35.1039	39.8301	0.360899	5.0019	9.57559	0.00197182	0.0416835	665180	Clec2l
Lamb3|-|-|1 H6|1 97.71 cM|protein-coding	1.43298	1.85016	0.750763	1.37232	0.988501	1.26145	1.94676	7.69624	2.25553	1.88037	1.54586	1.67203	1.14956	1.08584	9.5754	0.00197202	0.0416835	16780	Lamb3
S100b|AI850290|Bpb|-|10 C1|10 38.76 cM|protein-coding	79.1722	82.3761	82.1013	91.7393	73.5727	76.3479	101.816	118.637	94.8825	113.091	89.9175	82.2279	0.306718	6.50137	9.56653	0.00198157	0.0417768	20203	S100b
Bcas1|2210416M21Rik|9030223A09Rik|AI841227|NABC1|-|2|2 H3|protein-coding	119.797	122.903	105.75	95.8563	98.6383	90.4642	140.556	167.107	140.745	108.39	135.714	112.026	0.344915	6.90578	9.56153	0.00198697	0.0418101	76960	Bcas1
1110008P14Rik|C79326|-|2|2 B|protein-coding	31.6689	35.7697	29.816	44.463	36.857	34.4196	43.7049	42.7387	37.8177	56.4783	42.1247	48.6082	0.351865	5.33995	9.54555	0.00200435	0.0421123	73737	1110008P14Rik
Myom1|D430047A17Rik|-|17|17 E1.3|protein-coding	4.37059	3.0836	7.34675	5.55788	4.37765	6.00692	3.21216	3.52062	3.23292	3.42496	2.9629	3.76206	-0.622839	2.15008	9.51295	0.00204027	0.0428028	17929	Myom1
Mt1|MT-I|Mt-1|-|8 C5|8 46.34 cM|protein-coding	180.627	185.632	184.902	204.063	163.173	171.317	224.851	220.571	226.831	327.856	199.287	192.343	0.35296	7.69286	9.48422	0.00207247	0.0432837	17748	Mt1
Chchd2|AL033347|Etohi6|-|5|5 G1.3|protein-coding	39.407	53.0378	45.582	47.0018	39.6813	49.2567	54.4121	55.8387	52.7794	79.9158	55.2645	52.43	0.356953	5.70541	9.4858	0.00207068	0.0432837	14004	Chchd2
Lsm7|0910001B06Rik|1110033F18Rik|-|10|10 C1|protein-coding	0.573192	1.40964	0.482633	0.686158	0.494251	0.72083	1.55741	1.39187	1.12776	1.41028	1.03057	1.19431	0.849711	0.159954	9.48023	0.00207697	0.0433131	66094	Lsm7
Acyp1|1110039O14Rik|AI325944|-|12|12 D1|protein-coding	6.66336	9.25079	8.52652	9.26314	8.47287	11.0527	11.9726	10.8075	12.3302	12.8268	10.9498	11.4056	0.398768	3.38164	9.46624	0.00209288	0.0433861	66204	Acyp1
Plscr2|-|-|9|9 E3.3|protein-coding	3.29586	1.49775	2.94943	2.88186	2.61247	2.70311	0.973382	1.55562	1.12776	2.08184	2.44761	1.07487	-0.773105	1.18917	9.46653	0.00209255	0.0433861	18828	Plscr2
Acyp2|2310004B09Rik|-|11|11 A4|protein-coding	9.60097	12.5987	14.05	13.4487	14.6157	12.7347	15.9635	15.8837	17.8187	19.8782	17.5841	13.9137	0.389506	3.90445	9.43415	0.00212982	0.0440215	75572	Acyp2
Dlk2|AI413481|DLK-2|Egfl9|-|17|17 C|protein-coding	17.3391	21.8495	15.337	17.9773	19.064	18.9218	21.6091	28.0831	21.1268	30.1531	21.9641	20.8406	0.383098	4.41252	9.41954	0.00214685	0.0441216	106565	Dlk2
Cdc34|AI327276|UBE2R1|-|10 C1|10 39.72 cM|protein-coding	19.2019	23.6115	21.6649	22.1629	21.041	23.0065	27.7414	24.4806	26.6904	33.7795	26.2796	24.543	0.323802	4.62305	9.42169	0.00214434	0.0441216	216150	Cdc34
Slc4a7|E430014N10Rik|NBC3|NBCn1|NBCn1-G|-|14|14 A1|protein-coding	105.611	91.803	104.624	95.5132	103.651	100.976	86.7283	45.0312	93.7548	63.664	81.0288	84.4971	-0.405327	6.46341	9.4158	0.00215123	0.0441381	218756	Slc4a7
Rarb|A830025K23|Hap|Nr1b2|-|14 A2|14 7.08 cM|protein-coding	5.51698	4.75755	5.30897	5.55788	6.07222	6.30726	5.06159	70.5762	9.92432	6.17836	6.11902	4.23978	1.60388	3.4925	9.4009	0.00216879	0.0444333	218772	Rarb
Ppp1r12a|1200015F06Rik|5730577I22Rik|AA792106|AV099298|D10Ertd625e|Mypt1|-|10 D1|10 56.33 cM|protein-coding	98.804	97.7059	98.8326	80.6922	98.9913	93.5277	84.1976	77.2899	83.0786	47.6137	77.2929	75.2412	-0.355251	6.40215	9.38734	0.00218489	0.0446975	17931	Ppp1r12a
Zfp654|1600021C16Rik|1810008K20Rik|433036|Gm5488|Znf654|-|16|16 C1.3|protein-coding	32.5287	34.8887	38.6643	35.9547	36.2921	36.1016	29.4935	31.5219	30.9007	20.0125	29.951	29.2008	-0.328039	5.01245	9.36557	0.00221099	0.0450997	72020	Zfp654
Amer2|2600011E07Rik|Fam123a|-|14|14 D1|protein-coding	30.1642	33.8314	27.9391	22.7118	33.5384	27.812	27.6441	21.4512	23.3823	13.2969	22.6082	21.9752	-0.434734	4.68051	9.35622	0.0022223	0.0452644	72125	Amer2
Ndufa5|2900002J19Rik|-|6|6 A3.1|protein-coding	47.0734	46.9588	55.6101	58.1176	44.2001	48.596	62.3938	58.7862	59.6211	82.6692	59.902	55.2963	0.332563	5.8263	9.34344	0.00223784	0.0454825	68202	Ndufa5
Arxes1|6530401D17Rik|Spc22/23|Spcs3|-|X|X F1|protein-coding	9.17108	9.5151	8.95553	11.7333	11.3678	11.7736	10.6099	13.755	13.458	17.3934	14.6857	13.0776	0.412204	3.61768	9.34208	0.00223951	0.0454825	76219	Arxes1
Chl1|A530023M13Rik|AI465420|CALL|LICAM2|-|6|6 E1|protein-coding	332.667	344.129	342.348	310.761	342.728	330.32	296.784	153.106	286.978	232.763	273.295	287.648	-0.387987	8.20271	9.32162	0.00226466	0.0457301	12661	Chl1
Zfp518b|6820424L24Rik|AA410078|AI661722|Znf518b|-|5|5 B3|protein-coding	21.9963	24.6688	20.6996	18.389	24.2183	21.9253	18.981	15.9656	18.7209	14.5729	17.5841	18.2729	-0.340466	4.30744	9.32099	0.00226544	0.0457301	100515	Zfp518b
Rap1gap|1300019I11Rik|2310004O14Rik|AI427470|ARPP-90|Gap|Rap1GAP1|Rap1ga1|-|4 D3|4 70.02 cM|protein-coding	157.413	196.117	157.768	183.136	182.378	184.472	221.542	394.637	203.223	214.497	187.693	217.543	0.439268	7.70352	9.32278	0.00226323	0.0457301	110351	Rap1gap
2300009A05Rik|-|-|9|9 C|protein-coding	4.44224	5.72668	5.09446	5.6265	4.02461	5.10588	6.619	6.14062	7.96953	7.92442	5.60374	7.64355	0.484266	2.61421	9.31129	0.00227746	0.0458539	69478	2300009A05Rik
Fnip1|A730024A03Rik|AI838773|AW557298|-|11|11 B1.3|protein-coding	77.5243	75.0635	85.6943	73.5562	74.9849	76.1677	61.6151	73.7693	66.2373	45.9348	62.7361	65.2091	-0.303217	6.12986	9.30839	0.00228107	0.0458606	216742	Fnip1
Dok6|Dok-6|-|18|18 E4|protein-coding	22.5694	18.5897	19.4126	13.9976	20.3349	20.3635	20.733	12.3631	14.5106	4.63377	9.40397	9.73359	-0.698163	3.96869	9.28679	0.00230812	0.0463379	623279	Dok6
Esrrb|Err2|Errb|Estrrb|Nr3b2|-|12 D2|12 40.49 cM|protein-coding	2.07782	2.73118	2.41317	2.67602	3.31854	2.3427	1.16806	1.55562	1.20295	1.47743	1.93232	2.26918	-0.662773	1.17446	9.27393	0.00232439	0.0465498	26380	Esrrb
Pds5a|9030416H16Rik|E230024D05Rik|mKIAA0648|-|5|5 C3.1|protein-coding	55.2414	49.6899	56.5754	38.4249	53.2379	51.4793	42.4395	39.7093	43.4565	25.1836	43.2196	39.5912	-0.384354	5.49206	9.27319	0.00232533	0.0465498	71521	Pds5a
Nfat5|AI225870|B130038B15Rik|CAG-8|CAG80|NFATL1|OREBP|TonEBP|mKIAA0827|nfatz|-|8 D3|8 53.93 cM|protein-coding	212.081	180.787	193.643	154.18	181.743	172.038	166.254	148.03	161.345	110.942	149.433	146.243	-0.311494	7.36513	9.26612	0.00233432	0.046663	54446	Nfat5
Nthl1|Nth1|Octs3|-|17|17 A3.3|protein-coding	2.14947	1.49775	1.71603	2.53879	1.34154	2.10242	2.62813	4.17562	3.15774	2.7534	1.99673	3.70235	0.690158	1.38357	9.24745	0.00235823	0.0470675	18207	Nthl1
Ndufb6|CI-B17|Gm137|-|4|4 A5|protein-coding	24.6473	29.5144	24.2926	30.7399	24.2889	26.7308	36.1125	28.9837	32.4044	42.7785	28.856	33.6794	0.341504	4.92449	9.24509	0.00236128	0.0470675	230075	Ndufb6
Itga1|CD49A|E130012M19Rik|Vla1|-|13 D2.2|13 64.61 cM|protein-coding	11.034	6.16719	9.17004	5.2148	8.26105	7.74893	5.15893	7.12312	5.93956	2.35046	5.28168	3.10519	-0.725654	2.70707	9.23412	0.00237547	0.0471212	109700	Itga1
Alg10b|AA469671|AU045404|AW123895|C85569|Deaf1|Gm917|nse5|-|15|15 E3|protein-coding	38.1173	45.6372	37.7527	36.0919	42.5056	41.5078	34.0684	25.0537	35.6373	16.9233	34.4598	32.6643	-0.434154	5.13634	9.23001	0.00238081	0.0471212	380959	Alg10b
Mirg|2810474H01Rik|AI852992|Gm2928|Meg9|mir-410|-|12 F1|12|ncRNA	17.554	15.8585	21.8794	24.2214	16.2397	19.1621	29.5908	31.2762	20.826	29.7502	21.8997	21.4378	0.424283	4.49729	9.2321	0.00237808	0.0471212	100040724	Mirg
Igfn1|9830123M21Rik|-|1|1 E4|protein-coding	1.57628	0.528616	2.03779	1.92124	2.33004	0.961107	5.74295	11.7081	1.35332	1.88037	2.89849	1.49288	1.4037	1.53576	9.23538	0.00237383	0.0471212	226438	Igfn1
Snf8|D11Moh34|-|11 D|11 59.24 cM|protein-coding	24.504	27.2237	24.5071	30.6027	26.5483	27.2714	31.1482	32.8319	30.4496	40.8309	30.5307	32.724	0.306973	4.9099	9.2046	0.00241408	0.0475778	27681	Snf8
Mrps24|3110030K20Rik|AI414579|Rpms24|-|11|11 A1|protein-coding	14.1865	17.5324	14.1572	17.0167	17.2988	17.4201	19.7597	20.2231	19.2472	26.1909	19.5809	19.3477	0.35202	4.21887	9.19939	0.00242096	0.0475794	64660	Mrps24
Gls2|A330074B06Rik|AI195532|GA|GLS|Lga|-|10|10 D3|protein-coding	14.7597	18.5016	16.6777	16.3306	17.1576	15.3176	24.3346	23.4162	16.9916	21.8929	18.7435	20.3629	0.347057	4.23307	9.20176	0.00241783	0.0475794	216456	Gls2
Rbm15|C230088J01Rik|mKIAA1438|-|3|3 F2.3|protein-coding	10.6041	13.2154	11.2078	9.40037	14.5451	11.293	9.44181	9.16999	9.0973	7.52149	9.98367	7.46441	-0.416194	3.37523	9.19111	0.00243194	0.0476612	229700	Rbm15
Atp5e|2410043G19Rik|ATPE|AV000645|-|2|2 H4|protein-coding	35.2513	40.3511	40.4876	44.0514	39.7519	40.2464	48.9611	53.5462	43.5317	72.3943	43.4129	46.0405	0.358499	5.5172	9.17826	0.00244907	0.0479299	67126	Atp5e
Mbd6|D10Wsu93e|-|10 D3|10 74.5 cM|protein-coding	51.659	57.5311	46.4937	40.9636	59.9455	59.3484	59.1816	72.5412	68.0418	61.2464	66.2787	64.6716	0.311995	5.88538	9.1617	0.00247133	0.0482497	110962	Mbd6
Mtcl1|1110012J17Rik|Ccdc165|D130071O13|Kiaa0802|Soga2|mKIAA0802|t8219b25|-|17|17 E1.1|protein-coding	44.924	49.3375	43.1153	44.5317	45.7535	45.4724	74.9504	120.602	51.2005	45.599	57.1968	49.3845	0.54545	5.80841	9.16098	0.00247231	0.0482497	68617	Mtcl1
Nebl|1200007O21Rik|A630080F05Rik|BB140644|D830029A09Rik|Lnebl|-|2|2 A3|protein-coding	69.4996	61.76	72.5559	56.5394	72.1606	67.0973	58.5976	46.2593	56.313	25.7208	54.4915	52.7883	-0.443019	5.85717	9.15539	0.00247987	0.0483299	74103	Nebl
Btbd7|5730507E09Rik|8030448M07|E130118E17Rik|FUP1|mKIAA1525|-|12|12 E|protein-coding	19.7751	20.3517	18.6618	14.0662	18.0048	18.6214	15.5741	14.2462	14.2098	4.16368	11.4007	11.4653	-0.627403	3.92257	9.14566	0.00249309	0.0483626	238386	Btbd7
Kcnh4|BEC2|-|11 D|11 63.57 cM|protein-coding	3.15256	3.3479	2.62767	1.85263	3.10672	4.80554	3.89353	40.2825	5.48845	2.95487	2.9629	2.92605	1.62595	2.68217	9.14398	0.00249538	0.0483626	380728	Kcnh4
Cdkl5|BC038161|Stk9|-|X F4|X 73.95 cM|protein-coding	51.0858	59.3812	49.175	24.5645	49.4957	40.2464	44.7756	27.9194	29.3219	7.11855	22.2861	24.3041	-0.816575	5.16531	9.1507	0.00248622	0.0483626	382253	Cdkl5
Nup153|B130015D15Rik|C88147|-|13|13 A5|protein-coding	59.0388	57.443	65.6382	52.3539	67.7123	62.8924	52.5626	49.9437	51.8771	35.257	53.1389	49.2054	-0.323721	5.77896	9.13181	0.00251204	0.0486181	218210	Nup153
Elmsan1|9430029N19Rik|C130039O16Rik|Gm260|-|12|12 D1|protein-coding	47.0734	45.7253	38.7179	39.3169	46.4596	42.1686	31.6349	34.06	40.5995	27.3325	37.938	36.8443	-0.313833	5.29041	9.1187	0.00253009	0.0489	238317	Elmsan1
Zfp804b|Gm441|-|5|5 A1|protein-coding	2.36442	2.02636	2.46679	0.960621	2.18882	0.72083	0.973382	1.31	1.05258	0.201468	0.772929	0.955444	-1.03274	0.55828	9.09724	0.00255995	0.0491346	207618	Zfp804b
D130040H23Rik|-|-|8|8 B3.3|protein-coding	3.22421	2.29067	1.6624	0.960621	1.41214	1.44166	1.46007	1.31	0.902211	0.671561	0.901751	0.716583	-0.897237	0.617006	9.08985	0.00257032	0.0491346	211135	D130040H23Rik
2310009B15Rik|-|-|1|1 E4|protein-coding	2.86596	3.70031	3.32481	2.05847	2.9655	2.76318	4.18554	3.43875	4.73661	6.51415	3.607	4.41893	0.611889	1.94325	9.09412	0.00256433	0.0491346	69549	2310009B15Rik
Rasgrp2|CDC25L|Caldaggef1|-|19|19 A|protein-coding	9.38602	9.6913	10.8861	11.8019	10.3793	11.2329	9.83116	116.754	18.0442	11.8195	9.08192	10.5696	1.47271	4.31522	9.0904	0.00256955	0.0491346	19395	Rasgrp2
Col19a1|-|-|1|1 A5|protein-coding	72.7238	64.1388	79.7418	63.9499	63.8995	72.5035	68.3314	52.7275	61.9518	44.5917	52.2371	56.3115	-0.313483	5.97514	9.07481	0.00259155	0.0494727	12823	Col19a1
C1qtnf1|1600017K21Rik|CTRP1|Zsig37|-|11|11 E2|protein-coding	8.02469	3.61221	7.61488	6.5185	7.90801	6.4274	3.60151	4.33937	3.30811	4.56662	5.34609	5.37437	-0.592184	2.52474	9.05833	0.00261501	0.0497172	56745	C1qtnf1
Tmem255a|4933417N17|6430550H21Rik|Fam70a|-|X|X A3.3|protein-coding	47.2884	49.1613	51.749	49.7465	42.788	54.8432	31.7323	26.3637	42.855	42.0397	41.2229	45.4433	-0.361424	5.45834	9.05999	0.00261264	0.0497172	245386	Tmem255a
9130401M01Rik|AI849328|-|15|15 D1|protein-coding	18.1272	20.2636	17.1067	19.9672	16.3103	20.1832	21.2197	24.8081	22.7808	24.9821	21.8997	22.7515	0.308463	4.3918	9.05153	0.00262475	0.0498346	75758	9130401M01Rik
Mir3078|mmu-mir-3078|-|14 D1|14 33.77 cM|ncRNA	2.57937	3.3479	2.25229	2.67602	2.40065	2.64304	3.79619	3.93	3.45848	3.35781	4.50875	3.76206	0.533158	1.74207	9.04894	0.00262847	0.0498376	100526520	Mir3078

## Sheet: 13mths+J147_vs_13mths
Gene	13mths+J147_rep1	13mths+J147_rep2	13mths+J147_rep3	13mths+J147_rep4	13mths+J147_rep5	13mths+J147_rep6	13mths_rep1	13mths_rep2	13mths_rep3	13mths_rep4	13mths_rep5	13mths_rep6	logFC	logCPM	LR	PValue	FDR	GeneID	Symbol
Manf|3230402M22Rik|AA407711|AA408789|AA673178|Armet|D17914|D18Mgi17|-|9 F1|9 57.98 cM|protein-coding	37.3734	35.0121	36.2513	32.1888	32.3197	31.7697	54.4234	50.7694	50.6175	55.0954	54.0536	46.9643	0.602727	5.43543	40.133	2.37252e-10	3.3099e-06	74840	Manf
Hspa8|2410008N15Rik|Hsc70|Hsc71|Hsc73|Hsp73|Hspa10|-|9 A5.1|9 21.55 cM|protein-coding	54.9703	47.7117	48.2463	44.1472	45.5991	51.9868	84.3221	70.3718	71.9341	85.801	69.8835	70.7468	0.628404	5.96216	37.8316	7.71208e-10	5.37956e-06	15481	Hspa8
Hspa5|AL022860|AU019543|Bip|D2Wsu141e|D2Wsu17e|Grp78|Hsce70|SEZ-7|Sez7|baffled|mBiP|-|2 B|2 22.94 cM|protein-coding	194.735	177.794	191.297	176.139	155.74	168.369	276.905	297.973	239.981	264.928	277.218	237.884	0.583161	7.793	32.3643	1.27814e-08	5.94379e-05	14828	Hspa5
Cldn5|AI854493|MBEC1|Tmvcf|-|16 A3|16 11.63 cM|protein-coding	20.574	19.314	19.3696	23.1076	23.0437	20.2171	32.0483	32.3153	29.9035	38.0964	30.7591	29.3077	0.615486	4.73867	28.9929	7.26449e-08	0.000253367	12741	Cldn5
Hif3a|Ipas|MOP7|NEPAS|bHLHe17|-|7|7 A2|protein-coding	11.9616	11.6413	12.4392	13.6667	16.111	12.1944	4.20145	10.4163	7.38172	4.36732	4.82621	5.4051	-1.09231	3.26704	28.2931	1.04268e-07	0.000290928	53417	Hif3a
Map3k6|Ask2|MAPKKK6|MEKK6|-|4|4 D2.3|protein-coding	2.12651	2.64575	2.57669	2.15791	2.44107	2.13937	1.07479	0.738166	0.82856	1.20941	1.02959	1.14108	-1.20304	0.847594	25.7022	3.98378e-07	0.000824754	53608	Map3k6
ENSMUST00000082388.1	2384.4	2316.88	2166.46	1840.15	1863.12	2073.59	2994.36	3431.24	3211.88	4157.42	3262.65	2771.8	0.649086	11.4022	25.6288	4.13826e-07	0.000824754	ENSMUST00000082388.1	ENSMUST00000082388.1
Xdh|XO|Xor|Xox-1|Xox1|-|17 E2|17 45.25 cM|protein-coding	13.3439	11.3767	15.9044	15.6448	18.845	13.9059	8.79373	12.3028	6.47783	7.59241	7.65759	7.26686	-0.832005	3.54474	23.408	1.31034e-06	0.00228507	22436	Xdh
Ciart|Chrono|Gm129|-|3|3 F2.1|protein-coding	16.1615	10.4066	10.6622	9.1711	9.27606	11.2317	6.15561	7.05359	7.0051	6.78614	5.66275	5.22493	-0.831733	3.15181	22.3719	2.24639e-06	0.00348215	229599	Ciart
Sh2d3c|Chat|Nsp3|Shep1|-|2|2 B|protein-coding	28.5484	23.018	19.9915	21.0396	24.1177	27.5979	14.1677	13.123	13.031	16.5286	15.7013	18.9179	-0.655181	4.30657	22.1075	2.57807e-06	0.00359667	27387	Sh2d3c
Aldoart1|4921524E03Rik|Aldo1-ps|Aldo1-ps2|Aldoa-ps2|-|4|4 C3|protein-coding	28.3358	23.6353	25.8557	24.726	23.7272	30.593	39.6695	28.7065	38.7917	42.8669	39.3175	36.8147	0.527734	5.00533	19.2898	1.12306e-05	0.0130565	353204	Aldoart1
ENSMUST00000082390.1	2887.64	3154.35	3086.07	2595.06	2653.73	2972.02	3890.54	4064.67	4180.76	5293.93	4351.76	3592.41	0.548516	11.7978	19.3963	1.06212e-05	0.0130565	ENSMUST00000082390.1	ENSMUST00000082390.1
Syt2|IP4BP|R74640|mKIAA4194|-|1 E4|1 58.24 cM|protein-coding	51.4616	26.7221	24.7895	24.2764	22.3602	24.6028	13.1906	20.9967	11.4492	8.39869	12.1621	20.9598	-1.00217	4.45832	18.8784	1.3932e-05	0.0149512	20980	Syt2
Creld2|5730592L21Rik|C85758|-|15|15 E3|protein-coding	11.4832	10.7594	10.8399	10.0702	9.47134	11.6596	17.8806	19.2743	14.0855	17.5365	18.2109	11.8912	0.616089	3.78426	18.6204	1.59502e-05	0.0151893	76737	Creld2
Cox6c|-|-|15|15 B3.1|protein-coding	55.7146	52.7386	52.1557	60.1516	55.754	64.5021	76.0169	85.7093	75.173	111.669	70.4627	71.047	0.523794	6.11783	18.5754	1.63314e-05	0.0151893	12864	Cox6c
Hist1h2bc|2610022J01Rik|H2bfs|R74621|-|13|13 A3.1|protein-coding	9.19716	9.78927	11.5507	11.6887	10.6431	9.94809	17.0989	17.3059	14.6881	20.4256	16.5378	11.3507	0.633329	3.75774	18.1901	1.99913e-05	0.0164058	68024	Hist1h2bc
Ndufa5|2900002J19Rik|-|6|6 A3.1|protein-coding	47.1022	49.1227	47.3577	43.0682	43.9392	42.4666	62.6309	58.8892	59.7317	82.7103	59.845	55.6125	0.473824	5.77006	18.2272	1.96056e-05	0.0164058	68202	Ndufa5
Pantr1|2610017I09Rik|Pou3f3os|linc-Brn1a|-|1|1 B|ncRNA	19.8829	20.725	19.0142	19.2413	20.0168	18.6126	33.7093	25.8358	21.7685	34.6698	26.6407	28.4068	0.539939	4.59875	17.8147	2.43492e-05	0.018872	66297	Pantr1
Rps26|-|-|10|10 D3|protein-coding	33.4925	33.3364	33.4969	36.6844	33.0032	41.8248	49.3426	49.2931	46.6253	69.9443	42.5994	44.3819	0.513833	5.42684	17.3207	3.15735e-05	0.0228959	27370	Rps26
Plin4|S3-12|mKIAA1881|-|17|17 D|protein-coding	4.25302	5.73245	6.84155	8.4518	10.8383	5.56237	2.73583	4.34698	3.61554	2.82196	3.98967	3.54334	-0.973134	2.40601	17.2469	3.28233e-05	0.0228959	57435	Plin4
Traip|Trip|-|9 F1|9 59.07 cM|protein-coding	12.0148	14.1988	13.8608	12.9474	16.3063	12.9432	23.6454	34.9399	19.3582	20.9631	19.4335	15.3145	0.698587	4.18168	16.8308	4.08654e-05	0.0271483	22036	Traip
2900052N01Rik|AU067665|-|9|9 A5.3|ncRNA	20.9993	25.2228	23.279	24.0067	21.7743	23.3192	34.0024	35.9241	31.6359	31.3775	27.799	29.2476	0.454304	4.7838	16.6557	4.48162e-05	0.0284196	73040	2900052N01Rik
Pdia4|AI987846|Cai|ERp-72|Erp72|-|6 B2.3|6 22.94 cM|protein-coding	30.1433	35.2766	47.7132	40.8204	32.6127	34.6579	54.4234	53.476	46.1734	51.064	58.1719	44.8023	0.478866	5.46868	16.1916	5.72488e-05	0.0347252	12304	Pdia4
Fabp7|B-FABP|BFABP|Blbp|MRG|-|10|10 B4|protein-coding	18.8196	23.8117	21.4132	20.9497	18.845	22.1425	31.1689	25.5898	29.9035	45.756	29.4721	25.8244	0.577017	4.71879	16.0634	6.12565e-05	0.035528	12140	Fabp7
Tmem132d|C630028F04Rik|-|5|5 G1.2-G1.3|protein-coding	34.0242	22.1361	16.4375	16.0045	19.9191	18.5056	15.8287	15.1734	12.805	8.19712	9.97417	12.732	-0.774944	4.08522	15.9904	6.36656e-05	0.035528	243274	Tmem132d
Zdhhc14|B530001K09Rik|New1cp|-|17|17 A1|protein-coding	32.5888	45.4187	40.0719	42.0792	43.7439	43.8572	56.6707	57.4949	61.3135	58.5221	50.7717	47.8652	0.427288	5.60052	15.8389	6.89699e-05	0.0370077	224454	Zdhhc14
Rpl39|2810465O16Rik|-|X|X A3.3|protein-coding	24.3485	32.2781	33.5858	34.7962	33.0032	36.7972	50.222	51.5896	45.4202	69.2724	38.0305	36.1541	0.579392	5.34398	15.5141	8.18905e-05	0.0423131	67248	Rpl39
Calr|CRT|Calregulin|-|8 C2|8 41.21 cM|protein-coding	277.35	308.847	317.643	303.725	271.447	306.251	377.642	392.376	372.099	414.962	388.413	374.033	0.377841	8.41889	15.3521	8.92234e-05	0.0426125	12317	Calr
C77080|Kiaa1522|mKIAA1522|-|4|4 D2.2|protein-coding	25.7308	19.5785	17.7703	17.8027	18.5521	19.4683	10.6502	12.1387	10.018	12.8332	16.2161	16.6958	-0.596146	4.0556	15.3017	9.16332e-05	0.0426125	97130	C77080
Lrrc8c|AD158|AI326115|E430036I04Rik|fad158|-|5|5 E5|protein-coding	19.3512	18.432	19.3696	16.0944	17.6733	17.5429	14.07	15.0914	13.8596	10.0112	11.9047	12.0714	-0.501133	3.9612	15.4059	8.67174e-05	0.0426125	100604	Lrrc8c
H2-Ke6|D17H6S112E|H-2Ke6|Hsd17b8|Ke-6|Ke6|Ring2|-|17 B1|17 17.98 cM|protein-coding	15.364	19.2258	21.0578	23.3773	22.4578	22.1425	27.3583	29.5266	29.6775	35.0057	26.5763	25.8844	0.498912	4.64206	15.0196	0.0001064	0.0471372	14979	H2-Ke6
Ccnd1|AI327039|CycD1|Cyl-1|PRAD1|bcl-1|cD1|-|7 F5|7 88.92 cM|protein-coding	27.113	32.9837	35.7182	34.2568	35.0537	34.9788	52.9578	41.4193	41.9553	46.3608	41.8272	42.4601	0.417845	5.28818	14.9893	0.000108121	0.0471372	12443	Ccnd1
Sdf2l1|-|-|16|16 A3|protein-coding	5.47576	5.82065	7.37466	8.09215	6.34678	7.27387	11.8227	10.7444	8.13495	10.7503	10.8751	9.66912	0.623149	3.12067	14.9128	0.000112595	0.0476002	64136	Sdf2l1
Scrg1|AW124307|-|8 B2|8 29.8 cM|protein-coding	18.607	20.9014	19.4584	20.9497	20.7979	22.0356	31.7551	27.3942	24.5555	31.7134	25.7398	25.8244	0.44497	4.60334	14.772	0.000121322	0.0497814	20284	Scrg1
