# Supplementary material for: Elevating acetyl-CoA levels reduces aspects of brain aging
Source: eLife. 2019 Nov 19;8:e47866. doi: 10.7554/eLife.47866 (PMC6882557; doi:10.7554/eLife.47866)
Supplement: Supplementary file 2. — Fold changes and specific P values are indicated. One-way ANOVA (n = 6/group). [file elife-47866-supp2.xlsx]

## Sheet: Brain metabolites
Super Pathway	Sub Pathway	Biochemical Name	KEGG	HMDB	PUBCHEM	13mths/9mths	p-value	13mths+CMS121/13mths	p-value	13mths+J147/13mths	p-value
Amino Acid	Glycine, Serine and Threonine Metabolism	glycine	C00037	HMDB00123	750	0.83	5.7746e-05	0.94	0.112	1	0.9656
		N-acetylglycine		HMDB00532	10972	1.19	0.4407	0.95	0.8978	0.97	0.9494
		betaine	C00719	HMDB00043	247	0.99	0.7315	1.04	0.4278	1.15	0.0399
		serine	C00065	HMDB00187	5951	0.95	0.1377	0.9	0.0055	0.91	0.0202
		N-acetylserine		HMDB02931	65249	1.16	0.016	1.01	0.7105	1.05	0.2745
		threonine	C00188	HMDB00167	6288	0.83	2.3475e-06	0.93	0.0277	0.99	0.8974
		N-acetylthreonine			152204	0.97	0.5703	0.99	0.9355	0.99	0.9968
		allo-threonine	C05519	HMDB04041	99289	1.05	0.5074	0.83	0.1055	0.93	0.5277
	Alanine and Aspartate Metabolism	alanine	C00041	HMDB00161	5950	1.22	0.025	0.88	0.1283	0.89	0.1583
		N-acetylalanine	C02847	HMDB00766	88064	0.95	0.674	0.76	0.0158	0.99	0.9056
		aspartate	C00049	HMDB00191	5960	1	0.8745	1.02	0.6067	1	0.9379
		asparagine	C00152	HMDB00168	6267	0.92	0.2293	0.95	0.4438	1.07	0.3451
		N-acetylasparagine		HMDB06028	99715	1.01	0.8868	0.87	0.0839	0.93	0.3572
		N-acetylaspartate (NAA)	C01042	HMDB00812	65065	1.02	0.6036	1.03	0.3349	1.06	0.0664
	Glutamate Metabolism	glutamate	C00025	HMDB00148	611	1.09	0.0966	0.94	0.2408	0.99	0.8827
		glutamine	C00064	HMDB00641	5961	0.92	0.0307	0.94	0.0977	0.97	0.4484
		N-acetylglutamate	C00624	HMDB01138	70914	1.06	0.1123	1.06	0.0949	0.96	0.2627
		N-acetylglutamine	C02716	HMDB06029	182230	0.88	0.0331	0.94	0.331	1	0.9558
		N-acetyl-aspartyl-glutamate (NAAG)	C12270	HMDB01067	5255	0.83	0.0004	1.06	0.1796	1.09	0.0731
		gamma-aminobutyrate (GABA)	C00334	HMDB00112	119	0.85	5.0941e-06	1.06	0.0446	1.04	0.2168
		carboxyethyl-GABA		HMDB02201	2572	1.3	0.0362	1.01	0.6553	1.08	0.3133
		glutamate, gamma-methyl ester			68662	1.29	0.1741	0.8	0.2228	1.03	0.9226
		pyroglutamine*			134508	0.95	0.1009	0.99	0.8179	1.1	0.0068
		beta-citrylglutamate				0.67	9.3922e-08	1.14	0.0239	1.14	0.0316
		S-1-pyrroline-5-carboxylate	C04322	HMDB01301	1196	0.29	0.0003	0.9	0.7014	1.04	0.9212
	Histidine Metabolism	histidine	C00135	HMDB00177	6274	0.85	0.0028	0.99	0.79	1.05	0.2997
		imidazole lactate	C05568	HMDB02320	440129	0.9	0.0654	1.01	0.8217	1.03	0.6104
		1-methylhistamine	C05127	HMDB00898	3614	1.1	0.4543	0.88	0.2889	0.9	0.3738
		1-methylimidazoleacetate	C05828	HMDB02820	75810	0.86	0.055	0.86	0.0385	0.72	9.523e-05
	Lysine Metabolism	lysine	C00047	HMDB00182	5962	0.79	1.0664e-08	1	0.8808	1.1	0.0032
		N6-acetyllysine	C02727	HMDB00206	92832	0.85	0.3595	1.11	0.7108	1.23	0.1665
		N6,N6,N6-trimethyllysine	C03793	HMDB01325	440120	0.94	0.3728	0.99	0.8173	1.08	0.2047
		saccharopine	C00449	HMDB00279	160556	0.76	0.1457	0.79	0.2402	1.06	0.5748
		2-aminoadipate	C00956	HMDB00510	469	0.75	0.0242	1.28	0.041	1.38	0.0112
		glutarate (pentanedioate)	C00489	HMDB00661	743	1.57	0.0006	0.98	0.8551	0.99	0.9922
		glutarylcarnitine (C5-DC)		HMDB13130	71464488	2.41	0.001	0.61	0.1009	0.95	0.9727
		pipecolate	C00408	HMDB00070	849	0.67	1.091e-08	0.99	0.8372	1.12	0.033
		5-aminovalerate	C00431	HMDB03355	138	2.51	9.46e-13	1.05	0.4437	1.01	0.9269
		5-(galactosylhydroxy)-L-lysine				1.02	0.7461	0.98	0.777	1.12	0.0832
	Phenylalanine and Tyrosine Metabolism	phenylalanine	C00079	HMDB00159	6140	0.87	0.0034	1.02	0.7158	1.05	0.2185
		N-acetylphenylalanine	C03519	HMDB00512	74839	1.17	0.0722	0.94	0.4843	1.09	0.2596
		phenyllactate (PLA)	C05607	HMDB00779	3848	0.86	0.3046	0.88	0.8403	0.89	0.7161
		tyrosine	C00082	HMDB00158	6057	0.95	0.3285	1.06	0.2599	1.03	0.5009
		N-acetyltyrosine		HMDB00866	68310	0.86	0.4977	0.93	0.7504	1.63	0.0466
		4-hydroxyphenylpyruvate	C01179	HMDB00707	979	1.59	0.1387	0.62	0.1295	0.94	0.5377
		3-(4-hydroxyphenyl)lactate	C03672	HMDB00755	9378	0.96	0.7196	1.25	0.0481	1.26	0.0352
		phenol sulfate	C02180	HMDB60015	74426	0.33	2.1082e-06	0.55	0.0153	0.5	0.0054
		homovanillate (HVA)	C05582	HMDB00118	1738	0.83	0.1501	0.94	0.5229	1.11	0.5245
		N-formylphenylalanine			759256	0.96	0.6096	0.79	0.2609	1.08	0.677
	Tryptophan Metabolism	tryptophan	C00078	HMDB00929	6305	0.92	0.0919	1.06	0.2177	1.02	0.5816
		indolelactate	C02043	HMDB00671	92904	1.07	0.5976	1.33	0.0335	1	0.9718
		kynurenine	C00328	HMDB00684	161166	1.02	0.9373	1.09	0.5779	1.25	0.2161
		5-hydroxyindoleacetate	C05635	HMDB00763	1826	0.79	0.0155	1.05	0.6743	1.08	0.3708
		serotonin	C00780	HMDB00259	5202	1.23	0.3234	1.24	0.1929	1.55	0.0133
		C-glycosyltryptophan			10981970	1	0.9412	0.94	0.1142	1.01	0.7249
		thioproline			93176;6973609	0.19	5.9061e-09	1.15	0.55	1.31	0.2737
	Leucine, Isoleucine and Valine Metabolism	leucine	C00123	HMDB00687	6106	0.8	0.0003	1.05	0.3328	1.08	0.1538
		isovalerylcarnitine (C5)		HMDB00688	6426851	0.7	0.0832	0.73	0.5344	0.98	0.6724
		beta-hydroxyisovalerate		HMDB00754	69362	0.77	0.0389	0.86	0.163	0.96	0.8148
		alpha-hydroxyisovalerate		HMDB00407	99823	0.87	0.2876	0.94	0.7431	0.98	0.9153
		methylsuccinate		HMDB01844	10349	0.87	0.0641	1.05	0.5052	1.02	0.9032
		isoleucine	C00407	HMDB00172	6306	0.8	0.0003	1.08	0.1225	1.1	0.0676
		2-methylbutyrylcarnitine (C5)		HMDB00378	6426901	0.39	0.0049	0.87	0.8876	1.16	0.3092
		ethylmalonate		HMDB00622	11756	0.5	1.7511e-06	1.02	0.9876	0.98	0.8304
		valine	C00183	HMDB00883	6287	0.86	0.0031	1.04	0.3529	1.07	0.1437
		isobutyrylcarnitine (C4)		HMDB00736	168379	0.64	0.1919	0.83	0.6991	0.97	0.8445
		3-hydroxyisobutyrate	C06001	HMDB00336	87	0.54	0.0052	0.9	0.5656	1.21	0.5259
	Methionine, Cysteine, SAM and Taurine Metabolism	methionine	C00073	HMDB00696	6137	0.79	0.002	1.23	0.0058	1.22	0.0069
		N-acetylmethionine	C02712	HMDB11745	448580	0.71	0.0004	1.04	0.6521	1.27	0.0085
		N-formylmethionine	C03145	HMDB01015	439750	0.77	0.001	1.17	0.0437	1.21	0.0113
		methionine sulfoxide	C02989	HMDB02005	158980	1.97	1.0069e-05	1.09	0.4593	1.23	0.1087
		N-acetylmethionine sulfoxide			193368	3.1	5.6624e-09	0.85	0.1965	1	0.9666
		S-adenosylmethionine (SAM)	C00019	HMDB01185	34755	1.19	0.2901	1.06	0.7264	1.13	0.3956
		S-adenosylhomocysteine (SAH)	C00021	HMDB00939	439155	0.84	0.0051	1.07	0.2841	1.16	0.0237
		cystathionine	C02291	HMDB00099	439258	0.94	0.5514	1.02	0.8172	1.01	0.9293
		cysteine	C00097	HMDB00574	5862	0.43	1.2145e-08	0.98	0.6992	1.06	0.6713
		cystine	C00491	HMDB00192	67678	1.49	0.2194	0.68	0.3299	0.76	0.3116
		S-methylcysteine		HMDB02108	24417	1.51	0.0008	1.15	0.2488	1.4	0.0074
		cysteine sulfinic acid	C00606	HMDB00996	109	1.76	6.1855e-06	0.74	0.0034	0.81	0.0499
		hypotaurine	C00519	HMDB00965	107812	0.45	1.3442e-05	1.05	0.792	1.24	0.1915
		taurine	C00245	HMDB00251	1123	0.99	0.5182	1	0.822	1.01	0.811
		N-acetyltaurine			159864	1.7	5.4448e-06	0.87	0.1675	0.86	0.1177
		taurocyamine	C01959	HMDB03584	68340	3.91	1.3253e-07	0.67	0.0558	0.7	0.0479
		2-hydroxybutyrate/2-hydroxyisobutyrate				0.93	0.5926	1.05	0.9885	0.94	0.8653
	Urea cycle; Arginine and Proline Metabolism	arginine	C00062	HMDB00517	232	0.9	0.0252	0.99	0.8226	1.02	0.6508
		urea	C00086	HMDB00294	1176	0.92	0.1646	0.73	4.4671e-05	0.69	3.975e-06
		ornithine	C00077	HMDB03374	6262	0.63	0.0005	1.03	0.7031	1.06	0.628
		proline	C00148	HMDB00162	145742	0.84	0.0002	1.02	0.6183	1.06	0.137
		citrulline	C00327	HMDB00904	9750	0.56	9.383e-12	0.93	0.1204	0.94	0.2029
		argininosuccinate	C03406	HMDB00052	16950;828	0.77	0.0039	1.02	0.809	1.05	0.5665
		homoarginine	C01924	HMDB00670	9085	0.89	0.516	0.99	0.8829	1.1	0.6233
		dimethylarginine (SDMA + ADMA)	C03626	HMDB01539	123831	0.78	2.0341e-05	0.9	0.0515	1.06	0.2619
		N-acetylarginine	C02562	HMDB04620	67427	0.85	0.0103	1.11	0.0949	0.96	0.4105
		N-delta-acetylornithine			9920500	0.66	2.1452e-05	1.24	0.0114	1.2	0.0395
		trans-4-hydroxyproline	C01157	HMDB00725	5810	0.53	2.698e-11	1.01	0.9748	0.99	0.8452
		N-monomethylarginine	C03884	HMDB29416	132862	0.73	0.0127	0.84	0.1282	1.06	0.679
		2-oxoarginine*	C03771	HMDB04225	558	1.23	0.0549	0.94	0.5287	0.98	0.7229
	Creatine Metabolism	creatine	C00300	HMDB00064	586	0.98	0.2096	1.01	0.7528	1.01	0.5154
		creatinine	C00791	HMDB00562	588	1.04	0.5758	1	0.9606	1.1	0.2346
		creatine phosphate	C02305	HMDB01511	587	2.08	0.0294	1.39	0.3951	1.77	0.0451
		guanidinoacetate	C00581	HMDB00128	763	1.13	0.0091	0.92	0.0687	0.93	0.1295
	Polyamine Metabolism	putrescine	C00134	HMDB01414	1045	0.83	0.2141	0.94	0.8234	1.34	0.0703
		spermine	C00750	HMDB01256	1103	0.64	0.2736	0.82	0.6747	0.54	0.4172
		spermidine	C00315	HMDB01257	1102	0.83	0.9498	0.5	0.0448	1.3	0.6576
		5-methylthioadenosine (MTA)	C00170	HMDB01173	439176	1	0.9919	1.14	0.0515	1.25	0.003
		4-acetamidobutanoate	C02946	HMDB03681	18189	2.24	0.0144	0.77	0.5054	0.9	0.8344
	Guanidino and Acetamido Metabolism	4-guanidinobutanoate	C01035	HMDB03464	500	0.89	0.0192	1.06	0.2444	0.96	0.3127
	Glutathione Metabolism	glutathione, reduced (GSH)	C00051	HMDB00125	124886	0.56	0.0002	1.07	0.5355	1.49	0.0084
		glutathione, oxidized (GSSG)	C00127	HMDB03337	65359	0.74	0.0009	1.15	0.0778	1.19	0.0418
		cysteine-glutathione disulfide		HMDB00656	4247235	1.06	0.5294	1.09	0.3798	0.96	0.5054
		S-methylglutathione	C11347		3605667	2.29	0.0001	1.39	0.122	1.66	0.0085
		S-lactoylglutathione	C03451	HMDB01066	440018	0.71	0.1015	0.66	0.2168	1.63	0.0357
		cysteinylglycine	C01419	HMDB00078	439498	0.77	0.3641	0.87	0.4279	1.15	0.727
		5-oxoproline	C01879	HMDB00267	7405	0.82	0.0006	0.93	0.1644	0.95	0.3622
		4-hydroxy-nonenal-glutathione				2.3	3.4576e-09	1.2	0.0812	1.23	0.0507
Peptide	Gamma-glutamyl Amino Acid	gamma-glutamylglutamate	C05282	HMDB11737	92865	0.86	0.0499	1.03	0.7321	1.03	0.6895
		gamma-glutamylglutamine	C05283	HMDB11738	150914	0.86	0.0231	0.92	0.1817	1.02	0.8128
		gamma-glutamylglycine		HMDB11667	165527	0.71	0.0003	0.89	0.1297	0.88	0.114
		gamma-glutamylhistidine			7017195	0.87	0.075	0.88	0.0967	0.93	0.276
		gamma-glutamylisoleucine*		HMDB11170	14253342	0.77	0.0218	0.91	0.2964	1.01	0.9189
		gamma-glutamylleucine		HMDB11171	151023	0.73	0.0002	0.97	0.6817	1	0.9029
		gamma-glutamylmethionine		HMDB29155	7009567	0.54	0.0026	1.17	0.446	1.37	0.0828
		gamma-glutamylphenylalanine		HMDB00594	111299	0.84	0.0617	0.93	0.4867	0.88	0.1994
		gamma-glutamylthreonine		HMDB29159		0.89	0.0615	0.9	0.1359	0.88	0.0627
		gamma-glutamyltryptophan		HMDB29160	3989307	0.83	0.0635	1.08	0.4121	0.95	0.5943
		gamma-glutamyltyrosine		HMDB11741	94340	0.77	0.0187	0.95	0.4856	1.02	0.8334
		gamma-glutamylvaline		HMDB11172	7015683	0.81	0.0417	0.99	0.8998	0.98	0.865
	Dipeptide Derivative	carnosine	C00386	HMDB00033	439224	1.03	0.6289	1.13	0.1149	1.09	0.2419
		homocarnosine	C00884	HMDB00745	10243361	1.34	5.0275e-05	0.95	0.4624	0.93	0.2676
		anserine	C01262	HMDB00194	112072	0.81	0.367	1.12	0.8879	1.4	0.2496
	Dipeptide	isoleucylglycine			342532	0.48	0.0014	1.2	0.3507	1.3	0.1744
		leucylglycine			79070	0.54	0.0322	0.72	0.3306	1.08	0.7006
		prolylglycine			7408076;6426709	0.57	2.7275e-07	1.05	0.4486	1.26	0.0109
Carbohydrate	Glycolysis, Gluconeogenesis, and Pyruvate Metabolism	1,5-anhydroglucitol (1,5-AG)	C07326	HMDB02712	64960	0.62	0.0057	1.02	0.9527	0.99	0.9475
		glucose	C00031	HMDB00122	79025	0.56	0.0808	0.52	0.433	0.39	0.1188
		glucose 6-phosphate	C00668	HMDB01401	5958	0.69	0.0045	1.43	0.0052	1.07	0.5031
		Isobar: fructose 1,6-diphosphate, glucose 1,6-diphosphate, myo-inositol 1,4 or 1,3-diphosphate				1.52	0.1183	0.87	0.6236	1.18	0.6544
		dihydroxyacetone phosphate (DHAP)	C00111	HMDB01473	668	1.24	0.2836	0.76	0.1784	0.76	0.1062
		2-phosphoglycerate	C00631	HMDB03391	59	2.04	0.0843	1.53	0.061	1.92	0.0199
		3-phosphoglycerate	C00597	HMDB00807	724	5.34	2.3186e-09	1.27	0.0898	1.56	0.0089
		phosphoenolpyruvate (PEP)	C00074	HMDB00263	1005	4.61	3.789e-09	1.26	0.0937	1.57	0.0062
		pyruvate	C00022	HMDB00243	1060	1.48	0.016	0.75	0.0837	0.82	0.1754
		lactate	C00186	HMDB00190	612	0.95	0.4789	1.11	0.1616	1.14	0.0966
		glycerate	C00258	HMDB00139	752	6.38	1.466e-12	0.9	0.4452	1.07	0.8406
	Pentose Phosphate Pathway	6-phosphogluconate	C00345	HMDB01316	91493	0.71	0.0189	1.02	0.9415	1.22	0.2418
		ribose 1-phosphate	C00620	HMDB01489	439236	1.46	0.0304	0.81	0.2342	1.06	0.8055
		sedoheptulose-7-phosphate	C05382	HMDB01068	616	1.02	0.6117	1.11	0.0041	1.21	3.2534e-06
	Pentose Metabolism	ribose	C00121	HMDB00283	5779	0.91	0.2535	0.94	0.6347	0.95	0.7059
		ribitol	C00474	HMDB00508	6912	1.28	0.0296	1.02	0.7333	1.03	0.6945
		ribonate	C01685	HMDB00867	5460677	1.07	0.5664	0.94	0.5319	0.89	0.2516
		arabinose	C00216	HMDB00646	66308	0.92	0.6319	0.97	0.5374	0.96	0.8787
		arabitol/xylitol				0.95	0.7149	1.17	0.2233	0.97	0.8
		ribulose/xylulose				0.86	0.0639	0.89	0.1314	0.95	0.494
		arabonate/xylonate				1.25	0.0622	0.95	0.7307	0.92	0.4446
		sedoheptulose		HMDB03219	5459879	0.77	0.0882	1.05	0.786	0.94	0.9707
	Glycogen Metabolism	maltose	C00208	HMDB00163	10991489	0.95	0.7336	1.02	0.8927	1.11	0.7253
	Fructose, Mannose and Galactose Metabolism	fructose	C00095	HMDB00660	5984	1.1	0.6205	0.94	0.7349	1.04	0.9682
		mannitol/sorbitol	C01507	HMDB00247	5780	1.54	0.0027	1.12	0.334	1.05	0.8116
		mannose	C00159	HMDB00169	18950	0.62	0.0027	0.9	0.6328	0.8	0.2122
		mannose-6-phosphate	C00275	HMDB01078	439198	0.68	0.0098	1.38	0.0234	1.08	0.5849
		galactitol (dulcitol)	C01697	HMDB00107	11850	1.33	0.0614	0.99	0.8869	0.89	0.4038
		galactose 1-phosphate	C00446	HMDB00645	123912	1.15	0.225	0.94	0.5748	0.95	0.6051
		galactonate	C00880	HMDB00565	128869	0.98	0.8956	1.08	0.8477	1.18	0.4852
	Nucleotide Sugar	UDP-glucose	C00029	HMDB00286	8629	1.38	0.1415	1.01	0.5313	1.39	0.1628
		UDP-galactose	C00052	HMDB00302	18068	1.95	0.0005	0.75	0.0835	1.11	0.5777
		UDP-glucuronate	C00167	HMDB00935	17473	0.99	0.7951	1.05	0.4273	1.09	0.221
		guanosine 5'-diphospho-fucose				1.15	0.3321	0.93	0.7137	0.96	0.928
		UDP-N-acetylglucosamine	C00043	HMDB00290	445675	1.1	0.4147	1.05	0.4451	1.09	0.254
		UDP-N-acetylgalactosamine	C00203	HMDB00304	439185	1.03	0.5338	0.97	0.5902	1.02	0.7813
		cytidine 5'-monophospho-N-acetylneuraminic acid	C00128	HMDB01176	448209	1.19	0.6685	1.02	0.9947	1.54	0.1568
	Aminosugar Metabolism	glucosamine-6-phosphate	C00352	HMDB01254	439217	0.57	0.0008	1.58	0.0032	1.19	0.1519
		glucuronate	C00191	HMDB00127	444791	0.9	0.435	0.99	0.899	0.99	0.817
		N-acetylglucosamine 6-phosphate	C00357	HMDB02817	439219	0.6	3.2383e-06	1	0.9765	0.91	0.2259
		N-acetyl-glucosamine 1-phosphate	C04256	HMDB01367	440364	1.23	0.035	0.84	0.0579	0.86	0.0949
		N-acetylneuraminate	C00270	HMDB00230	439197	0.97	0.6693	0.98	0.8033	0.93	0.2782
		N-acetylglucosaminylasparagine	C04540	HMDB00489	123826	0.83	8.2525e-05	1.05	0.2244	1.13	0.0039
		erythronate*		HMDB00613	2781043	1.02	0.6754	0.98	0.6838	0.97	0.5437
		N-acetylglucosamine/N-acetylgalactosamine				0.93	0.3077	1.01	0.7747	1.06	0.4028
Energy	TCA Cycle	citrate	C00158	HMDB00094	311	6.19	1e-15	0.92	0.3912	0.86	0.1193
		aconitate [cis or trans]	C00417	HMDB00072		5.73	8e-15	0.86	0.1459	0.89	0.2618
		alpha-ketoglutarate	C00026	HMDB00208	51	9.51	0.0266	0.13	0.0495	0.43	0.1832
		succinylcarnitine (C4-DC)				1.4	0.1592	0.87	0.4597	1.06	0.7042
		succinate	C00042	HMDB00254	1110	7.85	0.0107	0.2	0.0462	0.47	0.1435
		fumarate	C00122	HMDB00134	444972	0.88	0.04	0.93	0.2169	1.03	0.6096
		malate	C00149	HMDB00156	525	0.96	0.3324	0.99	0.7979	1	0.9618
		2-methylcitrate/homocitrate				0.66	4.544e-09	0.98	0.6974	1.1	0.0419
	Oxidative Phosphorylation	acetylphosphate	C00227	HMDB01494	186	1.42	0.0183	0.87	0.3234	1.15	0.3714
		phosphate	C00009	HMDB01429	1061	0.93	0.012	1.01	0.8056	1.02	0.418
Lipid	Long Chain Fatty Acid	palmitate (16:0)	C00249	HMDB00220	985	0.92	0.5042	0.79	0.163	1	0.9446
		palmitoleate (16:1n7)	C08362	HMDB03229	445638	0.99	0.8509	1.07	0.7026	1.02	0.8983
		margarate (17:0)		HMDB02259	10465	1.27	0.2495	0.77	0.1848	0.9	0.6575
		10-heptadecenoate (17:1n7)		HMDB60038	5312435	1.56	0.0162	0.96	0.695	0.94	0.7335
		stearate (18:0)	C01530	HMDB00827	5281	0.84	0.2517	0.81	0.2222	0.99	0.9928
		nonadecanoate (19:0)	C16535	HMDB00772	12591	1	0.8793	0.71	0.0719	0.95	0.8453
		10-nonadecenoate (19:1n9)		HMDB13622	5312513	1.03	0.9947	0.75	0.1612	0.92	0.7318
		arachidate (20:0)	C06425	HMDB02212	10467	0.8	0.1322	0.8	0.1641	1.05	0.7163
		eicosenoate (20:1)		HMDB02231	5282768	0.83	0.2321	0.73	0.0862	0.99	0.9883
		behenate (22:0)*	C08281	HMDB00944	8215	1.06	0.9676	0.57	0.0167	1	0.8015
		erucate (22:1n9)	C08316	HMDB02068	5281116	0.83	0.2499	0.67	0.0366	0.98	0.9774
		nervonate (24:1n9)*	C08323	HMDB02368	5281120	1.61	0.1088	0.37	0.0295	0.87	0.7404
		oleate/vaccenate (18:1)				0.93	0.5581	0.76	0.1379	1	0.9315
	Polyunsaturated Fatty Acid (n3 and n6)	eicosapentaenoate (EPA; 20:5n3)	C06428	HMDB01999	446284	0.39	5.4338e-05	0.85	0.2894	0.97	0.7926
		docosapentaenoate (n3 DPA; 22:5n3)	C16513	HMDB01976	6441454	0.6	0.0194	0.71	0.1502	0.94	0.8261
		docosahexaenoate (DHA; 22:6n3)	C06429	HMDB02183	445580	0.7	0.0704	0.85	0.4046	1.04	0.8777
		linoleate (18:2n6)	C01595	HMDB00673	5280450	0.72	0.06	0.98	0.9818	1.11	0.5507
		linolenate [alpha or gamma; (18:3n3 or 6)]	C06426	HMDB03073	5280934	0.54	0.0003	1.24	0.2058	1.19	0.2585
		dihomo-linolenate (20:3n3 or n6)	C03242	HMDB02925	5280581	0.68	0.0545	0.7	0.1406	0.99	0.9457
		arachidonate (20:4n6)	C00219	HMDB01043	444899	0.78	0.1443	0.91	0.6372	1.05	0.7951
		adrenate (22:4n6)	C16527	HMDB02226	5497181	1	0.7699	0.61	0.1323	0.97	0.9934
		docosapentaenoate (n6 DPA; 22:5n6)	C16513	HMDB01976	6441454	1.33	0.1826	0.75	0.2188	0.96	0.8887
		docosadienoate (22:2n6)	C16533	HMDB61714	5282807	0.9	0.4973	0.74	0.1607	0.96	0.9633
		dihomo-linoleate (20:2n6)	C16525	HMDB05060	6439848	0.9	0.4836	0.75	0.1626	0.99	0.9763
		mead acid (20:3n9)		HMDB10378	5312531	0.86	0.4231	0.78	0.351	0.92	0.7774
	Fatty Acid, Dicarboxylate	2-hydroxyglutarate	C02630	HMDB00606	43	1.08	0.3352	0.97	0.8064	1.03	0.7362
		2-hydroxyadipate	C02360	HMDB00321	193530	0.84	0.4766	1.04	0.7852	1.23	0.2834
		maleate	C01384	HMDB00176	444266	1.66	0.0013	0.88	0.4122	0.89	0.4837
		pimelate (heptanedioate)	C02656	HMDB00857	385	1.63	0.0012	0.93	0.7025	0.92	0.6311
		azelate (nonanedioate)	C08261	HMDB00784	2266	0.39	0.0231	0.72	0.4839	0.68	0.3681
	Fatty Acid, Amino	2-aminoheptanoate			227939	1.35	0.1569	0.93	0.7434	0.96	0.8841
	Fatty Acid Synthesis	malonylcarnitine		HMDB02095	22833583	1.01	0.879	1.16	0.0995	1.22	0.0455
		malonate	C00383	HMDB00691	867	1.39	0.0003	0.83	0.0324	0.97	0.6814
	Fatty Acid Metabolism	acetyl CoA	C00024	HMDB01206	444493	0.52	0.0033	1.65	0.0302	1.66	0.0335
	Fatty Acid Metabolism (also BCAA Metabolism)	propionylcarnitine	C03017	HMDB00824	107738	1.08	0.472	1.13	0.2754	1.22	0.0874
		methylmalonate (MMA)	C02170	HMDB00202	487	1.26	0.1442	0.93	0.4794	0.87	0.4042
	Fatty Acid Metabolism(Acyl Carnitine)	acetylcarnitine (C2)	C02571	HMDB00201	1	0.66	0.0751	1.51	0.0884	1.61	0.069
		3-hydroxybutyrylcarnitine (1)		HMDB13127	53481617	0.68	0.1006	1.79	0.0206	1.95	0.0289
		3-hydroxybutyrylcarnitine (2)				1.2	0.2245	1.74	8.5754e-05	1.84	2.3875e-05
		hexanoylcarnitine (C6)		HMDB00705	6426853	1.5	0.0361	1.15	0.3631	0.96	0.9966
		laurylcarnitine (C12)		HMDB02250	10427569	0.9	0.4988	1.45	0.044	1.17	0.4078
		myristoylcarnitine (C14)		HMDB05066	53477791	1.14	0.1146	1.19	0.0378	1.14	0.119
		palmitoylcarnitine (C16)	C02990	HMDB00222	461	1.04	0.4802	1.12	0.1082	1.09	0.1869
		palmitoleoylcarnitine (C16:1)*				1.12	0.3302	1.24	0.0371	1.09	0.4213
		stearoylcarnitine (C18)		HMDB00848	6426855	0.94	0.7233	1.21	0.0055	1.33	0.0047
		linoleoylcarnitine (C18:2)*		HMDB06469	6450015	0.81	0.1135	1.56	0.002	1.53	0.0026
		oleoylcarnitine (C18:1)		HMDB05065	6441392;53477789	1.06	0.468	1.28	0.0079	1.19	0.0453
	Carnitine Metabolism	deoxycarnitine	C01181	HMDB01161	134	0.93	0.1915	0.97	0.5126	1.02	0.7282
		carnitine	C00318	HMDB00062	10917	0.79	0.0054	1.15	0.0747	1.27	0.0059
	Ketone Bodies	3-hydroxybutyrate (BHBA)	C01089	HMDB00357	441	0.72	0.0961	0.95	0.9543	1.28	0.2146
	Fatty Acid, Monohydroxy	2-hydroxyoleate			9796304	4.12	7.2197e-08	0.79	0.2057	0.71	0.0683
		2-hydroxypalmitate		HMDB31057	92836	3.21	6.7936e-07	0.85	0.3484	0.71	0.0642
		2-hydroxystearate	C03045		69417	3.87	1.0892e-06	0.76	0.1987	0.73	0.1589
		4-HDoHE				0.9	0.4343	0.9	0.4907	0.83	0.1336
		13-HODE + 9-HODE			43013	0.86	0.2065	1.17	0.2041	1.08	0.589
	Fatty Acid, Oxidized	4-hydroxy-2-nonenal		HMDB04362	1693	1.95	0.0053	0.97	0.3885	1.33	0.2063
	Eicosanoid	prostaglandin E2	C00584	HMDB01220	5280360	1.65	5.3031e-07	0.94	0.3834	0.85	0.0318
		prostaglandin F2alpha	C00639	HMDB01139	5280363	1.53	2.9893e-07	1.08	0.2191	0.91	0.1793
		5-HETE	C04805	HMDB11134	5280733	1.29	0.1105	1.02	0.9148	0.77	0.073
		12-HETE		HMDB06111	5312983	1.13	0.3952	1.27	0.2746	0.81	0.2857
		15-HETE	C04742	HMDB02110	5280724	1.13	0.3002	1.06	0.6819	0.91	0.3393
		12-HHTrE			5283141	1.02	0.8848	1.05	0.5765	0.91	0.2907
		5-KETE	C14732	HMDB10217	5283159	8.19	0.0021	1.15	0.4121	1.26	0.3999
		15-KETE	C04577	HMDB10210	5280701	2.22	0.0001	1.24	0.2753	1.06	0.6181
	Endocannabinoid	oleoyl ethanolamide		HMDB02088	5283454	0.78	0.1338	0.68	0.1578	0.95	0.9456
		palmitoyl ethanolamide	C16512	HMDB02100	4671	0.83	0.2328	0.65	0.1291	0.91	0.9192
		stearoyl ethanolamide		HMDB13078	27902	0.86	0.1343	0.79	0.3999	0.93	0.9356
		arachidonoyl ethanolamide	C11695	HMDB04080	5281969	0.84	0.0479	1	0.9634	1.02	0.7278
		N-arachidonoyltaurine				7.25	0.0059	1.2	0.295	1	0.3754
		N-oleoyltaurine			6437033	1.32	0.679	0.78	0.9107	0.89	0.9262
		N-stearoyltaurine			168274	0.93	0.5918	0.92	0.742	0.99	0.9394
		N-palmitoyltaurine				0.95	0.7483	0.97	0.9077	0.9	0.6803
		linoleoyl ethanolamide		HMDB12252	5283446	0.71	0.0753	0.71	0.2254	0.86	0.6962
	Inositol Metabolism	myo-inositol	C00137	HMDB00211	892	0.93	0.123	1.04	0.3354	1.02	0.6007
		chiro-inositol	C19891	HMDB34220		0.84	0.472	0.91	0.6371	0.81	0.4258
		inositol 1-phosphate (I1P)	C04006	HMDB00213	440194	2.04	0.0316	1.87	0.1313	0.95	0.8288
	Phospholipid Metabolism	choline	C00114	HMDB00097	305	1.05	0.2683	0.93	0.1076	0.92	0.0456
		choline phosphate	C00588	HMDB01565	1014	0.9	0.0005	1.04	0.1724	1.06	0.0454
		cytidine 5'-diphosphocholine	C00307	HMDB01413	13804	1.02	0.8834	1.15	0.0519	1.11	0.1432
		glycerophosphorylcholine (GPC)	C00670	HMDB00086	71920	1.2	0.2077	1.21	0.0773	1.19	0.1277
		phosphoethanolamine	C00346	HMDB00224	1015	0.99	0.563	1	0.8353	0.99	0.6901
		cytidine-5'-diphosphoethanolamine	C00570	HMDB01564	123727	1.12	0.154	0.88	0.1234	1.03	0.8359
		glycerophosphoethanolamine	C01233	HMDB00114	123874	1.06	0.2652	1.12	0.0206	1.05	0.2872
		glycerophosphoserine*			3081457	0.88	0.2099	1.61	0.0016	1.5	0.0047
		trimethylamine N-oxide	C01104	HMDB00925	1145	0.79	0.601	0.7	0.2036	0.97	0.8492
		glycerophosphoinositol*				0.81	0.1156	1.29	0.0813	1.41	0.0289
		1,2-dipalmitoyl-GPC (16:0/16:0)		HMDB00564	452110	1.01	0.9662	1.17	0.0609	0.99	0.9297
		1,2-dipalmitoyl-GPE (16:0/16:0)*			11802774;445468	0.94	0.455	0.84	0.0882	0.95	0.6616
		1-palmitoyl-2-oleoyl-GPA (16:0/18:1)	C13889		5283523	1.48	5.3436e-05	1.14	0.122	0.97	0.7242
		1-palmitoyl-2-oleoyl-GPC (16:0/18:1)			6436017	0.99	0.8725	1.17	0.0374	1.02	0.7888
		1-palmitoyl-2-linoleoyl-GPC (16:0/18:2)			5287971	0.94	0.1024	1	0.994	1.03	0.4614
		1-stearoyl-2-arachidonoyl-GPC (18:0/20:4)			16219824	0.92	0.0246	1.07	0.0483	1.05	0.1731
		1-stearoyl-2-oleoyl-GPC (18:0/18:1)				0.93	0.3894	1.2	0.0246	1.07	0.4313
		1-stearoyl-2-oleoyl-GPI (18:0/18:1)*				0.88	0.2103	0.88	0.3694	1.05	0.5761
		1,2-dioleoyl-GPC (18:1/18:1)			10350317	1.04	0.496	1.07	0.2727	1.01	0.8029
		1-palmitoyl-2-arachidonoyl-GPC (16:0/20:4n6)			10747814	0.96	0.4652	1.07	0.1925	1.02	0.6687
		1-stearoyl-2-linoleoyl-GPC (18:0/18:2)*				0.87	0.2021	1.23	0.0849	1	0.8758
		1-palmitoyl-2-palmitoleoyl-GPC (16:0/16:1)*				1.08	0.0892	1.03	0.4671	0.96	0.3716
		1-stearoyl-2-arachidonoyl-GPI (18:0/20:4)				0.92	0.0222	1.06	0.1052	1.09	0.0222
		1-oleoyl-2-linoleoyl-GPC (18:1/18:2)*				0.86	0.0659	0.99	0.8453	1.07	0.3822
		1-palmitoyl-2-arachidonoyl-GPI (16:0/20:4)*				1.07	0.7505	0.9	0.7516	1.18	0.4463
		1-palmitoyl-2-oleoyl-GPG (16:0/18:1)			5283509	0.97	0.3679	1	0.9085	1.1	0.0064
		1-palmitoyl-2-oleoyl-GPE (16:0/18:1)		HMDB05320	5283496	0.96	0.4146	0.96	0.3875	1.04	0.4061
		1-palmitoyl-2-stearoyl-GPE (16:0/18:0)*			5326793	0.84	0.2746	0.8	0.1027	1	0.9708
		1-stearoyl-2-arachidonoyl-GPE (18:0/20:4)			5289133	0.89	0.0281	1.09	0.0681	1.04	0.4128
		1-stearoyl-2-oleoyl-GPE (18:0/18:1)				1.01	0.8001	0.92	0.1929	1.02	0.8741
		1-palmitoyl-2-arachidonoyl-GPE (16:0/20:4)*		HMDB05323	9546800	0.9	0.0289	1.08	0.0853	1.11	0.0254
		1-palmitoyl-2-linoleoyl-GPE (16:0/18:2)		HMDB05322	9546747	0.87	0.028	0.98	0.7665	1.04	0.5132
		1-palmitoyl-2-stearoyl-GPC (16:0/18:0)				0.88	0.1097	1.17	0.058	1.06	0.5603
		1,2-dioleoyl-GPE (18:1/18:1)			9546757	0.96	0.2819	0.97	0.4923	1.04	0.356
		1-palmitoyl-2-oleoyl-GPI (16:0/18:1)*				1.12	0.0836	0.87	0.0312	1.11	0.1118
		1,2-dioleoyl-GPS (18:1/18:1)			6438639	1.06	0.4168	0.98	0.7271	0.99	0.7776
		1-palmitoleoyl-2-linoleoyl-GPC (16:1/18:2)*				0.92	0.6658	0.91	0.4476	1.11	0.4718
		1,2-dilinoleoyl-GPC (18:2/18:2)			5288075	1.02	0.8432	0.73	0.0441	0.77	0.0917
		1-oleoyl-2-linoleoyl-GPE (18:1/18:2)*		HMDB05349	9546753	0.7	2.6674e-06	1.15	0.0221	1.15	0.0211
		1-linoleoyl-2-arachidonoyl-GPC (18:2/20:4n6)*				0.91	0.5307	1.02	0.8243	1.18	0.163
		1-linoleoyl-2-arachidonoyl-GPE (18:2/20:4)*				0.68	0.0121	0.97	0.7959	1.12	0.3913
		1-palmitoyl-2-oleoyl-GPS (16:0/18:1)	C13880		5283499	1.06	0.2649	0.97	0.5454	1.04	0.443
		1,2-dipalmitoyl-GPG (16:0/16:0)			11846227	1.03	0.3985	0.98	0.6872	1.05	0.2882
		1-oleoyl-2-arachidonoyl-GPE (18:1/20:4)*				0.93	0.1322	1.09	0.0663	1.09	0.0649
		1-oleoyl-2-arachidonoyl-GPI (18:1/20:4) *				1	0.7962	0.91	0.4949	1.04	0.8145
		1-palmitoyl-2-gamma-linolenoyl-GPC (16:0/18:3n6)*				0.95	0.5497	1.02	0.7556	1.03	0.6842
	Phosphatidylserine (PS)	1-stearoyl-2-arachidonoyl-GPS (18:0/20:4)				1.03	0.4383	1.05	0.2259	1.06	0.1127
		1-stearoyl-2-oleoyl-GPS (18:0/18:1)			9547087	1.05	0.3324	1.09	0.0908	1.05	0.3031
	Lysolipid	1-palmitoyl-GPC (16:0)		HMDB10382	86554	1.04	0.9856	0.8	0.3619	0.97	0.9542
		2-palmitoyl-GPC (16:0)*		HMDB61702	15061532	0.8	0.2374	0.82	0.5238	1.02	0.8093
		1-palmitoleoyl-GPC (16:1)*		HMDB10383	24779461	1.38	0.026	1.09	0.3245	1	0.7696
		1-stearoyl-GPC (18:0)		HMDB10384	497299	1.26	0.0055	1.14	0.0659	1.06	0.333
		1-oleoyl-GPC (18:1)		HMDB02815	16081932	1.16	0.0496	1.17	0.0632	1.11	0.2119
		1-linoleoyl-GPC (18:2)	C04100	HMDB10386	11988421	1.13	0.3353	1.15	0.2249	1.07	0.5581
		1-arachidonoyl-GPC (20:4n6)*	C05208	HMDB10395		0.99	0.8159	1.03	0.6846	0.88	0.7458
		1-palmitoyl-GPE (16:0)		HMDB11503	9547069	1.39	0.0004	1.03	0.7578	0.99	0.931
		1-stearoyl-GPE (18:0)		HMDB11130	9547068	1.03	0.41	1.14	0.1965	1.01	0.8429
		2-stearoyl-GPE (18:0)*				0.84	0.3955	0.5	0.061	0.85	0.8098
		1-oleoyl-GPE (18:1)		HMDB11506	9547071	1.08	0.8443	0.78	0.4149	0.82	0.4971
		1-linoleoyl-GPE (18:2)*		HMDB11507	52925130	1.16	0.2969	1.12	0.3971	0.89	0.6634
		1-arachidonoyl-GPE (20:4n6)*		HMDB11517	42607465	1.16	0.5621	0.92	0.7911	0.94	0.8688
		1-palmitoyl-GPI (16:0)		HMDB61695		1.51	0.1205	0.97	0.9802	0.92	0.7292
		1-stearoyl-GPI (18:0)		HMDB61696		1.22	0.4916	0.89	0.7159	1.01	0.8867
		1-oleoyl-GPI (18:1)*				1.41	0.1858	1.12	0.5654	1.01	0.9793
		1-arachidonoyl-GPI (20:4)*		HMDB61690		1.08	0.6618	1.14	0.4557	0.93	0.5864
		1-stearoyl-GPS (18:0)*			9547101	2.31	1.687e-12	0.99	0.7865	0.97	0.5336
		1-oleoyl-GPS (18:1)			9547099	0.87	0.5249	1.06	0.6824	0.91	0.5422
		1-palmitoyl-GPG (16:0)*			3300276	1	0.9273	1.3	0.3231	0.95	0.7224
		1-palmitoyl-GPS (16:0)*			9547100	1.51	0.0176	1.03	0.8736	0.83	0.27
		1-stearoyl-GPG (18:0)				0.95	0.7804	1.29	0.2421	1.02	0.7615
		1-oleoyl-GPG (18:1)*				1.08	0.6283	1.29	0.2861	1.01	0.9448
	Plasmalogen	1-(1-enyl-palmitoyl)-2-oleoyl-GPE (P-16:0/18:1)*				0.88	0.0639	1.12	0.0811	1	0.9077
		1-(1-enyl-palmitoyl)-2-linoleoyl-GPE (P-16:0/18:2)*				0.82	0.1843	1.14	0.292	1.04	0.4522
		1-(1-enyl-palmitoyl)-2-palmitoyl-GPC (P-16:0/16:0)*			11146967	0.93	0.6704	0.83	0.2327	1.01	0.9088
		1-(1-enyl-palmitoyl)-2-palmitoleoyl-GPC (P-16:0/16:1)*				1.01	0.9958	0.78	0.2216	0.94	0.7675
		1-(1-enyl-palmitoyl)-2-arachidonoyl-GPE (P-16:0/20:4)*				0.77	4.1675e-05	1.13	0.0313	1.08	0.1565
		1-(1-enyl-palmitoyl)-2-oleoyl-GPC (P-16:0/18:1)*				1.05	0.7988	0.82	0.2457	0.96	0.8625
		1-(1-enyl-stearoyl)-2-oleoyl-GPE (P-18:0/18:1)				0.86	0.0003	0.99	0.6677	1.03	0.5289
		1-(1-enyl-palmitoyl)-2-arachidonoyl-GPC (P-16:0/20:4)*				0.86	0.3381	0.94	0.6948	1	0.8382
		1-(1-enyl-stearoyl)-2-arachidonoyl-GPE (P-18:0/20:4)*		HMDB05779	9547058	0.86	0.0001	1.03	0.4519	1.04	0.2185
	Lysoplasmalogen	1-(1-enyl-palmitoyl)-GPE (P-16:0)*				1.21	0.0164	1.12	0.1662	0.95	0.57
		1-(1-enyl-oleoyl)-GPE (P-18:1)*				0.97	0.9605	1.17	0.0674	1.05	0.5553
		1-(1-enyl-stearoyl)-GPE (P-18:0)*				0.85	0.1521	1.17	0.0862	1.08	0.405
		1-(1-enyl-oleoyl)-2-oleoyl-GPE (P-18:1/18:1)*		HMDB11441		1	0.9956	1.13	0.0955	1	0.9007
	Glycerolipid Metabolism	glycerol	C00116	HMDB00131	753	0.93	0.2315	0.94	0.334	1.15	0.0338
		glycerol 3-phosphate	C00093	HMDB00126	754	1.79	0.017	0.83	0.3454	0.73	0.1499
		glycerophosphoglycerol	C03274		439964	1.04	0.6041	1.1	0.2008	1.03	0.6968
	Monoacylglycerol	1-palmitoylglycerol (16:0)		HMDB31074	14900	1.08	0.5196	0.5	0.0151	0.71	0.2281
		2-palmitoylglycerol (16:0)		HMDB11533	123409	2.85	0.002	0.42	0.0081	0.61	0.1721
		1-oleoylglycerol (18:1)		HMDB11567	5283468	2.25	0.2532	0.41	0.2054	0.82	0.931
		2-oleoylglycerol (18:1)			5319879	1.6	0.0663	0.53	0.0395	1.14	0.4947
		1-arachidonylglycerol (20:4)	C13857	HMDB11572	5282281	1.32	0.4498	0.57	0.0884	0.77	0.4574
		2-arachidonoylglycerol (20:4)	C13856	HMDB04666	5282280	1.21	0.47	0.69	0.1975	0.91	0.6379
		1-docosahexaenoylglycerol (22:6)		HMDB11587		0.94	0.9918	0.62	0.1647	0.94	0.7171
		2-docosahexaenoylglycerol (22:6)*		HMDB11557		1.23	0.4958	0.5	0.1162	0.89	0.662
	Diacylglycerol	oleoyl-linoleoyl-glycerol (18:1/18:2) [2]				1.18	0.0985	1.3	0.013	1.25	0.0323
		oleoyl-arachidonoyl-glycerol (18:1/20:4) [2]*				1.1	0.0834	1.07	0.2648	0.95	0.3192
		palmitoyl-arachidonoyl-glycerol (16:0/20:4) [1]*				1	0.9434	0.86	0.0999	0.85	0.0686
		palmitoyl-arachidonoyl-glycerol (16:0/20:4) [2]*				1.09	0.1349	1.11	0.0981	0.98	0.7612
		palmitoyl-docosahexaenoyl-glycerol (16:0/22:6) [1]*				1.06	0.6353	0.71	0.018	0.84	0.22
		palmitoyl-docosahexaenoyl-glycerol (16:0/22:6) [2]*				1.04	0.8093	0.82	0.0889	0.93	0.6737
		stearoyl-docosahexaenoyl-glycerol (18:0/22:6) [1]*				1.09	0.2507	0.84	0.0327	0.81	0.0123
		stearoyl-docosahexaenoyl-glycerol (18:0/22:6) [2]*				1.26	0.0002	1.04	0.448	0.85	0.0053
		palmitoyl-oleoyl-glycerol (16:0/18:1) [2]*				1.3	0.0028	1	0.9795	0.97	0.6964
		palmitoyl-linoleoyl-glycerol (16:0/18:2) [2]*				1.07	0.5994	1.15	0.3668	1.16	0.5026
		stearoyl-linoleoyl-glycerol (18:0/18:2) [2]*				0.88	0.2499	1.15	0.251	1.21	0.0725
		oleoyl-oleoyl-glycerol (18:1/18:1) [2]*				1.36	0.0009	0.91	0.2053	0.88	0.1256
	Sphingolipid Metabolism	sphinganine	C00836	HMDB00269	3126	0.99	0.9566	1.01	0.9246	0.93	0.4082
		N-palmitoyl-sphinganine (d18:0/16:0)		HMDB11760	5283572	0.96	0.6221	0.93	0.5175	0.99	0.9314
		palmitoyl dihydrosphingomyelin (d18:0/16:0)*			9939965	1.2	0.1078	0.98	0.8753	1.1	0.4108
		behenoyl dihydrosphingomyelin (d18:0/22:0)*				0.58	0.0295	0.78	0.2617	1.09	0.8135
		palmitoyl sphingomyelin (d18:1/16:0)			9939941	1.05	0.2371	1.06	0.1087	1.04	0.3401
		stearoyl sphingomyelin (d18:1/18:0)	C00550	HMDB01348	6453725	1.01	0.9332	1.12	0.1685	0.95	0.5607
		behenoyl sphingomyelin (d18:1/22:0)*				0.79	0.0389	1.19	0.1404	1.11	0.4071
		tricosanoyl sphingomyelin (d18:1/23:0)*				1.01	0.9486	0.83	0.1311	1.11	0.3604
		lignoceroyl sphingomyelin (d18:1/24:0)				0.89	0.4627	0.78	0.0911	1.14	0.3304
		sphingomyelin (d18:1/14:0, d16:1/16:0)*			11433862	1.43	2.0693e-05	1.01	0.8806	1.05	0.4945
		sphingomyelin (d18:1/15:0, d16:1/17:0)*				1.15	0.286	0.95	0.7322	1.05	0.765
		sphingomyelin (d18:2/16:0, d18:1/16:1)*				1.17	0.0618	1.07	0.3432	1.15	0.1014
		sphingomyelin (d18:1/17:0, d17:1/18:0, d19:1/16:0)				1.1	0.1004	0.95	0.4021	1.03	0.5248
		sphingomyelin (d18:1/18:1, d18:2/18:0)			6443882	1	0.9472	1.1	0.0194	1.06	0.1395
		sphingomyelin (d18:1/20:0, d16:1/22:0)*				0.85	0.0232	1.11	0.1157	1.06	0.4018
		sphingomyelin (d18:1/21:0, d17:1/22:0, d16:1/23:0)*				0.88	0.1725	1.02	0.689	1.22	0.0479
		sphingomyelin (d18:1/22:1, d18:2/22:0, d16:1/24:1)*				0.93	0.559	0.88	0.1986	1	0.9063
		sphingomyelin (d18:2/23:0, d18:1/23:1, d17:1/24:1)*				1.2	0.0357	1.03	0.8549	1.06	0.5947
		sphingomyelin (d18:1/24:1, d18:2/24:0)*				0.9	0.3041	1.38	0.0018	1.16	0.1204
		sphingomyelin (d18:2/24:1, d18:1/24:2)*				1.08	0.4128	1.01	0.9872	0.97	0.6748
		3-sulfo-nervonoyl-galactosylceramide (d18:1/24:1)				1.15	0.3675	1.13	0.2408	1.05	0.6955
		sphingosine	C00319	HMDB00252	5353955	0.9	0.0069	0.99	0.7785	1.06	0.0866
		sphingosine 1-phosphate	C06124	HMDB00277	5283560	1.87	0.0212	1.46	0.1392	1.04	0.9495
		N-palmitoyl-sphingosine (d18:1/16:0)		HMDB04949	5283564	0.93	0.1669	0.9	0.0902	0.97	0.625
		N-stearoyl-sphingosine (d18:1/18:0)*		HMDB04950	5283565	0.86	0.0487	0.97	0.7837	0.93	0.3397
		phytosphingosine	C12144	HMDB04610	122121	0.79	0.0027	1.03	0.6687	1.05	0.4596
		glycosyl-N-palmitoyl-sphingosine (d18:1/16:0)				1.01	0.7611	0.83	0.1866	0.91	0.5031
		glycosyl-N-stearoyl-sphingosine (d18:1/18:0)				0.96	0.3406	0.97	0.4991	1.04	0.4535
		lactosyl-N-stearoyl-sphingosine (d18:1/18:0)*		HMDB11591	10260120	1.12	0.2483	1.06	0.3226	0.98	0.9909
	Mevalonate Metabolism	3-hydroxy-3-methylglutarate	C03761	HMDB00355	1662	0.98	0.8488	0.97	0.6541	1.03	0.6895
	Sterol	desmosterol	C01802	HMDB02719	439577	0.95	0.6834	0.85	0.1001	0.9	0.2398
		cholesterol	C00187	HMDB00067	11025495	0.99	0.9311	1.07	0.0923	0.95	0.1425
		4-cholesten-3-one	C00599	HMDB00921	91477	1.98	0.0012	0.8	0.233	0.96	0.6537
		campesterol	C01789	HMDB02869	173183	1.2	0.2423	0.81	0.2801	0.68	0.0576
		7-hydroxycholesterol (alpha or beta)				3.35	1.7583e-08	1.02	0.9243	0.96	0.6906
	Steroid	corticosterone	C02140	HMDB01547	5753	0.77	0.5402	1.57	0.3816	2.03	0.3908
	Fatty Acid Metabolism (Acyl Choline)	palmitoylcholine			151731	0.97	0.6396	0.94	0.4102	0.9	0.1173
		oleoylcholine				0.81	0.0286	0.95	0.665	0.88	0.1888
Nucleotide	Purine Metabolism, (Hypo)Xanthine/Inosine containing	inosine 5'-monophosphate (IMP)	C00130	HMDB00175	8582	3.34	0.0592	0.33	0.0883	0.49	0.2948
		inosine	C00294	HMDB00195	6021	1	0.8532	1.02	0.3769	1.12	0.0003
		hypoxanthine	C00262	HMDB00157	790	0.85	0.0003	0.99	0.84	1.04	0.266
		xanthine	C00385	HMDB00292	1188	0.9	0.0231	1.04	0.3606	1.03	0.4515
		xanthosine	C01762	HMDB00299	64959	1	0.8106	0.97	0.9782	1.05	0.3668
		2'-deoxyinosine	C05512	HMDB00071	65058	0.94	0.2693	1.2	0.0052	1.14	0.0422
		urate	C00366	HMDB00289	1175	0.83	0.0816	1.13	0.2019	1.08	0.4261
		allantoin	C02350	HMDB00462	204	0.7	0.0277	1.08	0.5818	1	0.9456
	Purine Metabolism, Adenine containing	adenosine 5'-diphosphate (ADP)	C00008	HMDB01341	6022	1.65	0.0005	0.92	0.6106	1.05	0.5862
		adenosine 5'-monophosphate (AMP)	C00020	HMDB00045	6083	1.88	0.0002	0.84	0.3492	0.91	0.576
		adenosine 3'-monophosphate (3'-AMP)	C01367	HMDB03540	41211	1.1	0.5958	1.05	0.7582	1.27	0.0954
		adenosine 2'-monophosphate (2'-AMP)	C00946	HMDB11617	94136	0.16	1.9082e-07	1.37	0.1885	1.89	0.0433
		adenosine 3',5'-cyclic monophosphate (cAMP)	C00575	HMDB00058	6076	1.45	0.0805	0.74	0.2097	0.91	0.7182
		adenylosuccinate	C03794	HMDB00536	195	5.66	2.5186e-07	1.04	0.6768	0.91	0.9244
		adenosine	C00212	HMDB00050	60961	1.41	0.0612	1.09	0.4774	1.15	0.2754
		adenine	C00147	HMDB00034	190	0.44	0.0009	1.49	0.0394	1.48	0.0465
		N1-methyladenosine	C02494	HMDB03331	27476	0.86	0.0202	1.02	0.7614	1.02	0.7974
		N6-carbamoylthreonyladenosine		HMDB41623	161466	0.87	0.0898	1.08	0.3269	1.01	0.8451
		N6-succinyladenosine		HMDB00912		0.72	0.0127	1.18	0.2066	1.13	0.3428
	Purine Metabolism, Guanine containing	guanosine 5'- diphosphate (GDP)	C00035	HMDB01201	8977	1.37	0.124	0.9	0.6364	0.86	0.4363
		guanosine 5'- monophosphate (5'-GMP)	C00144	HMDB01397	6804	1.46	0.0097	0.87	0.2786	0.83	0.1149
		guanosine	C00387	HMDB00133	6802	1.22	0.0292	0.83	0.0359	0.98	0.8625
		guanine	C00242	HMDB00132	764	1.96	0.0059	0.69	0.1162	1.29	0.1944
		7-methylguanine	C02242	HMDB00897	11361	1.03	0.882	1.07	0.6159	1.07	0.5508
		2'-deoxyguanosine	C00330	HMDB00085	187790	0.92	0.3306	1.14	0.1581	1.28	0.0132
	Pyrimidine Metabolism, Orotate containing	orotate	C00295	HMDB00226	967	1.11	0.3877	0.97	0.7751	0.95	0.6631
		orotidine	C01103	HMDB00788	92751	1.02	0.8021	1.06	0.488	0.99	0.861
	Pyrimidine Metabolism, Uracil containing	uridine 5'-monophosphate (UMP)	C00105	HMDB00288	6030	1.81	0.002	0.63	0.0127	0.9	0.4618
		uridine	C00299	HMDB00296	6029	0.92	0.083	1.03	0.4691	1.13	0.0122
		uracil	C00106	HMDB00300	1174	0.85	0.0296	0.88	0.1124	0.97	0.7197
		pseudouridine	C02067	HMDB00767	15047	0.86	0.0052	1.1	0.0598	1.12	0.0335
		5-methyluridine (ribothymidine)		HMDB00884	445408	0.88	0.4254	1.21	0.2677	1.08	0.8331
		2'-deoxyuridine	C00526	HMDB00012	13712	0.82	0.1331	1.22	0.1515	1.19	0.1935
		3-ureidopropionate	C02642	HMDB00026	111	0.92	0.5435	0.88	0.5096	0.66	0.0196
		beta-alanine	C00099	HMDB00056	239	1.06	0.4245	0.98	0.8529	1	0.9359
		N-acetyl-beta-alanine	C01073		76406	1.22	0.9349	0.86	0.9883	0.67	0.3678
	Pyrimidine Metabolism, Cytidine containing	cytidine 5'-monophosphate (5'-CMP)	C00055	HMDB00095	6131	0.87	0.0008	1.03	0.5071	1.01	0.7415
		cytidine 2',3'-cyclic monophosphate	C02354	HMDB11691	417654	1.08	0.763	0.74	0.233	1.02	0.9137
		cytidine	C00475	HMDB00089	6175	0.95	0.1935	0.94	0.1058	0.96	0.2902
		3-methylcytidine			159649	1.08	0.1672	1.04	0.4632	1.06	0.4291
		5-methylcytidine		HMDB00982	92918	1.02	0.8743	0.89	0.2084	0.86	0.0781
		2'-deoxycytidine	C00881	HMDB00014	13711	0.86	0.0433	1.08	0.2857	1.09	0.2364
	Pyrimidine Metabolism, Thymine containing	thymidine	C00214	HMDB00273	5789	0.88	0.2843	1.17	0.2103	1.31	0.0225
	Purine and Pyrimidine Metabolism	methylphosphate		HMDB61711	13130	1.52	0.0003	1.08	0.3737	1.06	0.6759
Cofactors and Vitamins	Nicotinate and Nicotinamide Metabolism	nicotinamide	C00153	HMDB01406	936	0.96	0.099	1	0.8859	1	0.9202
		nicotinamide riboside	C03150	HMDB00855	439924	0.47	0.0038	0.68	0.6513	0.88	0.7563
		nicotinamide adenine dinucleotide (NAD+)	C00003	HMDB00902	5893	0.73	0.0003	1.07	0.3296	1	0.9062
		trigonelline (N'-methylnicotinate)	C01004	HMDB00875	5570	0.7	6.9149e-05	1.14	0.1017	1.12	0.1332
		N1-Methyl-2-pyridone-5-carboxamide	C05842	HMDB04193	69698	1.42	0.0101	1.04	0.7919	1.17	0.2703
		adenosine 5'-diphosphoribose (ADP-ribose)	C00301	HMDB01178	192	5.03	0.0323	0.33	0.0946	0.52	0.3333
	Riboflavin Metabolism	flavin adenine dinucleotide (FAD)	C00016	HMDB01248	643975	0.88	0.0114	0.96	0.3563	1.13	0.016
		flavin mononucleotide (FMN)	C00061	HMDB01520	710	0.8	0.0353	0.75	0.0072	1.05	0.609
	Pantothenate and CoA Metabolism	pantothenate	C00864	HMDB00210	6613	0.84	0.0012	1.16	0.0029	1.19	0.001
		phosphopantetheine	C01134	HMDB01416	987	0.43	0.0002	0.91	0.7315	1.03	0.9529
		3'-dephosphocoenzyme A	C00882	HMDB01373	444485	1.15	0.2541	0.94	0.6269	1.03	0.9386
		3’-dephospho-acetyl-coenzyme A			193680	0.5	0.0028	1.73	0.0185	1.84	0.0164
		coenzyme A	C00010	HMDB01423	317	0.97	0.7664	0.93	0.387	1.03	0.7003
	Ascorbate and Aldarate Metabolism	ascorbate (Vitamin C)	C00072	HMDB00044		0.13	8.501e-10	1.61	0.0488	1.53	0.0617
		dehydroascorbate	C05422	HMDB01264	835	1.66	4.6071e-06	1.08	0.4286	1.12	0.2583
		threonate	C01620	HMDB00943	151152	1.86	8.1108e-05	0.92	0.4285	0.84	0.157
		oxalate (ethanedioate)	C00209	HMDB02329	971	2.19	1.8929e-11	0.89	0.1182	0.96	0.613
		gulonate*		HMDB03290	9794176	0.81	0.0155	1	0.849	0.97	0.943
	Tocopherol Metabolism	alpha-tocopherol	C02477	HMDB01893	14985	0.33	1.7301e-06	1.25	0.2626	1.36	0.1013
	Folate Metabolism	5-methyltetrahydrofolate (5MeTHF)	C00440	HMDB01396	146	0.72	0.0262	0.96	0.7767	1.35	0.0396
	Hemoglobin and Porphyrin Metabolism	heme	C00032	HMDB03178	26945	0.1	0.0005	1.39	0.8019	1.89	0.6811
	Thiamine Metabolism	thiamin (Vitamin B1)	C00378	HMDB00235	1130	0.73	2.7088e-08	1.1	0.0192	1.08	0.0553
		thiamin monophosphate	C01081	HMDB02666	3382778	0.68	1.4043e-06	1.21	0.0052	1.08	0.1814
		thiamin diphosphate	C00068	HMDB01372	1132	0.61	0.0055	1.07	0.6383	1.37	0.0532
	Vitamin B6 Metabolism	pyridoxamine	C00534	HMDB01431	1052	0.86	0.0904	1.06	0.4379	1.05	0.4702
		pyridoxamine phosphate	C00647	HMDB01555	1053	0.68	0.0162	1.33	0.0553	1.22	0.1753
		pyridoxal phosphate	C00018	HMDB01491	1051	0.96	0.5937	0.48	0.0336	0.96	0.792
		pyridoxal	C00250	HMDB01545	1050	0.95	0.2562	1.05	0.2463	1.08	0.109
		pyridoxate	C00847	HMDB00017	6723	1.19	0.7595	0.91	0.7082	1.05	0.4821
Xenobiotics	Benzoate Metabolism	hippurate	C01586	HMDB00714	464	0.7	0.0516	0.94	0.5824	1.13	0.2041
		benzoate	C00180	HMDB01870	243	1.43	0.0007	1.14	0.2229	1.41	0.0016
	Food Component/Plant	gluconate	C00257	HMDB00625	10690	1.15	0.3767	0.92	0.5816	1.24	0.4816
		chlorogenate			5315832	1	1	1.09	0.8838	24.97	0.0019
		ergothioneine	C05570	HMDB03045	3032311	0.15	0	1.7	2.4754e-05	1.35	0.0103
		erythritol	C00503	HMDB02994	222285	0.85	0.0072	1.09	0.1451	1.07	0.2345
		N-glycolylneuraminate	C03410	HMDB00833	123802	0.8	0.0535	1.38	0.0119	1.06	0.6635
		quinate	C00296	HMDB03072	6508	0.34	0.0671	1.06	0.6022	6.64	0.2607
		stachydrine	C10172	HMDB04827	115244	0.28	7.3663e-08	1.37	0.0724	1.19	0.35
		methyl glucopyranoside (alpha + beta)				0.1	0	1.03	0.6983	1.05	0.5308
	Bacterial/Fungal	tartronate (hydroxymalonate)	C02287	HMDB35227	45	1.61	0.001	0.87	0.3033	1.08	0.6342
	Chemical	O-sulfo-L-tyrosine			514186	0.81	0.0012	0.94	0.2407	1.04	0.4483
		HEPES			23831	2.24	0.0002	0.68	0.0405	0.88	0.5971
		trizma acetate	C07182		6503	0.26	6.6198e-05	1.45	0.4604	1.11	0.7265
