# Supplementary material for: Elevating acetyl-CoA levels reduces aspects of brain aging
Source: eLife. 2019 Nov 19;8:e47866. doi: 10.7554/eLife.47866 (PMC6882557; doi:10.7554/eLife.47866)
Supplement: Supplementary file 3. — Fold changes and specific P values are indicated. One-way ANOVA (n = 6/group). [file elife-47866-supp3.xlsx]

## Sheet: Plasma metabolites
Super Pathway	Sub Pathway	Biochemical Name	KEGG	HMDB	PUBCHEM	13mths/9mths	p-value	13mths+CMS121/13mths	p-value	13mths+J147/13mths	p-value
Amino Acid	Glycine, Serine and Threonine Metabolism	glycine	C00037	HMDB00123	750	0.73	0.0035	0.79	0.02	0.73	0.0033
		N-acetylglycine		HMDB00532	10972	0.69	0.0106	1.18	0.2312	1.08	0.6241
		sarcosine	C00213	HMDB00271	1088	0.57	0.003	0.84	0.4406	1.02	0.8531
		dimethylglycine	C01026	HMDB00092	673	1.17	0.2016	0.96	0.6478	0.93	0.4838
		betaine	C00719	HMDB00043	247	0.64	0.0133	0.93	0.6943	0.93	0.7732
		serine	C00065	HMDB00187	5951	0.95	0.4902	0.81	0.012	0.74	0.0009
		N-acetylserine		HMDB02931	65249	0.86	0.3415	1.34	0.0849	1.17	0.3109
		threonine	C00188	HMDB00167	6288	0.72	0.0014	0.82	0.0436	0.73	0.0013
		N-acetylthreonine			152204	0.82	0.3084	0.83	0.365	0.82	0.3197
	Alanine and Aspartate Metabolism	alanine	C00041	HMDB00161	5950	0.6	0.0008	1.23	0.1228	0.88	0.3511
		N-acetylalanine	C02847	HMDB00766	88064	0.59	0.001	1.26	0.091	1.14	0.3135
		aspartate	C00049	HMDB00191	5960	0.35	0.0008	1.25	0.9835	0.67	0.1678
		asparagine	C00152	HMDB00168	6267	0.79	0.0507	0.89	0.3223	0.84	0.1176
		N-acetylaspartate (NAA)	C01042	HMDB00812	65065	0.81	0.1561	0.66	0.0905	0.56	0.0115
	Glutamate Metabolism	glutamate	C00025	HMDB00148	611	0.82	0.2714	0.93	0.2957	0.51	0.0003
		glutamine	C00064	HMDB00641	5961	0.78	0.0062	1	0.8836	1.08	0.3895
		N-acetylglutamate	C00624	HMDB01138	70914	0.64	0.0211	0.95	0.4883	0.7	0.6172
		N-acetylglutamine	C02716	HMDB06029	182230	0.65	0.0464	1.45	0.1002	1.28	0.2371
		N-acetyl-aspartyl-glutamate (NAAG)	C12270	HMDB01067	5255	0.37	0.0967	1.33	0.387	1.35	0.2285
		pyroglutamine*			134508	0.95	0.7251	1.04	0.8243	1.02	0.8907
		N-methyl-GABA			1550042;70703	0.43	0.0037	1.07	0.8212	0.62	0.2191
	Histidine Metabolism	histidine	C00135	HMDB00177	6274	1.05	0.5387	0.81	0.0071	0.82	0.0101
		N-acetylhistidine	C02997	HMDB32055	75619	0.64	0.0083	0.98	0.9536	0.88	0.5706
		1-methylhistidine	C01152	HMDB00001	92105	0.43	0.0007	1.55	0.0294	1.33	0.1598
		3-methylhistidine	C01152	HMDB00479	64969	0.75	0.0247	1.11	0.3398	1.23	0.0913
		N-acetyl-3-methylhistidine*			193270	0.59	0.0074	1.25	0.2168	1.28	0.1634
		trans-urocanate	C00785	HMDB00301	736715	0.66	0.2386	0.94	0.2958	1.11	0.7284
		formiminoglutamate	C00439		439233	0.83	0.6796	1.44	0.8153	0.71	0.3105
		imidazole propionate		HMDB02271	70630	0.41	0.0061	2.25	0.0492	2.87	0.0034
		imidazole lactate	C05568	HMDB02320	440129	0.99	0.9313	1.28	0.0173	0.85	0.078
		histamine	C00388	HMDB00870	774	0.26	1.3588e-05	0.67	0.1121	0.78	0.3267
		1-methylhistamine	C05127	HMDB00898	3614	0.72	0.1322	0.67	0.0424	0.6	0.0255
		1-methylimidazoleacetate	C05828	HMDB02820	75810	1.44	0.0066	0.98	0.9956	0.74	0.0228
		4-imidazoleacetate	C02835	HMDB02024	96215	0.65	0.0113	0.86	0.372	0.8	0.1508
	Lysine Metabolism	lysine	C00047	HMDB00182	5962	0.98	0.8295	0.83	0.0345	0.78	0.0057
		N6-acetyllysine	C02727	HMDB00206	92832	0.54	0.0005	1.34	0.0749	0.97	0.7804
		N6,N6,N6-trimethyllysine	C03793	HMDB01325	440120	0.54	0.0005	0.98	0.9248	0.88	0.3974
		5-hydroxylysine	C16741	HMDB00450	1029	0.29	4.083e-07	1.06	0.7571	1.04	0.9337
		2-aminoadipate	C00956	HMDB00510	469	0.5	0.0007	0.72	0.0585	0.81	0.2248
		2-oxoadipate	C00322	HMDB00225	71	0.63	0.0402	1	0.9683	0.79	0.2506
		glutarate (pentanedioate)	C00489	HMDB00661	743	0.63	0.0844	1.02	0.81	0.59	0.5289
		pipecolate	C00408	HMDB00070	849	0.47	1.3112e-11	1.19	0.0131	1.21	0.0065
		N2,N6-diacetyllysine			91827	0.64	0.0017	1.02	0.8291	0.97	0.7795
		6-oxopiperidine-2-carboxylate			3014237	0.46	0.0013	0.84	0.3734	0.76	0.0882
	Phenylalanine and Tyrosine Metabolism	phenylalanine	C00079	HMDB00159	6140	0.92	0.2897	0.89	0.1137	0.83	0.0138
		N-acetylphenylalanine	C03519	HMDB00512	74839	0.57	0.0002	0.76	0.0554	0.79	0.1051
		phenylpyruvate	C00166	HMDB00205	997	0.1	3.0088e-10	1.67	0.0154	2.68	0.0001
		phenyllactate (PLA)	C05607	HMDB00779	3848	0.75	0.0995	1.01	0.8675	0.8	0.1998
		4-hydroxyphenylacetate	C00642	HMDB00020	127	0.83	0.3564	1.43	0.0619	1.27	0.3173
		tyrosine	C00082	HMDB00158	6057	0.92	0.6382	0.81	0.1158	0.78	0.041
		N-acetyltyrosine		HMDB00866	68310	0.47	0.0007	0.84	0.4357	0.94	0.7917
		4-hydroxycinnamate	C00811	HMDB02035	637542	0.83	0.4834	0.56	0.0056	0.45	0.0015
		4-hydroxyphenylpyruvate	C01179	HMDB00707	979	0.09	2.258e-09	2.85	0.0006	3.21	0.0002
		3-(4-hydroxyphenyl)lactate	C03672	HMDB00755	9378	1.14	0.5429	0.88	0.4273	0.79	0.2029
		phenol sulfate	C02180	HMDB60015	74426	0.82	0.4046	0.38	0.0003	0.61	0.0132
		p-cresol sulfate	C01468	HMDB11635	4615423	1.53	0.3518	1.23	0.6225	1.69	0.6584
		o-cresol sulfate			11615528	0.57	0.0539	3.02	0.0047	1.27	0.5113
		3-methoxytyrosine		HMDB01434	1670	0.73	0.1243	0.91	0.6997	0.94	0.8903
		homovanillate sulfate		HMDB11719	29981063	0.47	0.022	1.27	0.6418	1.56	0.2743
		gentisate	C00628	HMDB00152	3469	0.6	0.0233	1.03	0.8575	2.29	0.0031
		phenylpropionylglycine		HMDB00860	152323	0.25	0.1431	1.57	0.6061	0.51	0.0796
		3-(3-hydroxyphenyl)propionate sulfate			187488	0.57	0.2037	1.15	0.8939	8.79	0.0001
		3-(3-hydroxyphenyl)propionate	C11457	HMDB00375	91	1.06	0.6939	1.74	0.5529	6.96	0.0002
		3-(4-hydroxyphenyl)propionate	C01744	HMDB02199	10394	0.68	0.4722	1.89	0.9229	10.27	5.8409e-05
		3-phenylpropionate (hydrocinnamate)	C05629	HMDB00764	107	0.75	0.656	0.81	0.1812	0.13	0.0013
		thyroxine	C01829	HMDB01918	5819	1.81	0.0001	0.43	7.5271e-07	0.69	0.0128
		2-hydroxyphenylacetate	C05852	HMDB00669	11970	0.84	0.4263	0.77	0.1914	0.59	0.0115
		p-cresol-glucuronide*		HMDB11686	154035	0.17	0.0031	1.3	0.8489	3.41	0.2374
		N-formylphenylalanine			759256	0	4.44e-13	0.39	0.0865	0.32	0.0328
		4-hydroxycinnamate sulfate			6070438	0.51	0.0288	0.76	0.3564	1.55	0.2304
	Tryptophan Metabolism	tryptophan	C00078	HMDB00929	6305	1.27	0.0057	0.93	0.4151	0.81	0.0167
		N-acetyltryptophan	C03137	HMDB13713	700653	0.67	0.0022	1.04	0.6872	0.8	0.0833
		indolelactate	C02043	HMDB00671	92904	1.07	0.5136	0.81	0.074	0.63	0.0004
		indoleacetate	C00954	HMDB00197	802	0.97	0.7345	1.22	0.1045	1.16	0.2651
		indolepropionate		HMDB02302	3744	0.78	0.1061	0.9	0.5202	0.66	0.0163
		indolepropionylglycine			7677842	0.23	3.2998e-06	1.31	0.2301	0.74	0.2633
		3-indoxyl sulfate		HMDB00682	10258	0.84	0.3099	0.57	0.0019	0.52	0.0005
		kynurenine	C00328	HMDB00684	161166	0.71	0.2327	1.24	0.4724	1.53	0.2736
		kynurenate	C01717	HMDB00715	3845	0.64	0.0628	1.52	0.1214	1.32	0.4079
		xanthurenate	C02470	HMDB00881	5699	0.58	0.0782	1.55	0.1393	0.81	0.3753
		picolinate	C10164	HMDB02243	1018	0.87	0.3169	0.74	0.0248	0.49	2.1188e-05
		5-hydroxyindoleacetate	C05635	HMDB00763	1826	0.59	0.0037	0.79	0.1786	0.68	0.0333
		serotonin	C00780	HMDB00259	5202	0.02	1.72e-07	2.47	0.1948	3.32	0.1521
		indole-3-carboxylic acid	C19837	HMDB03320	69867	0.87	0.1556	0.93	0.3472	0.89	0.2009
		C-glycosyltryptophan			10981970	0.54	0.0103	1.38	0.1558	1.29	0.3572
		N-acetylkynurenine (2)				0.54	0.031	1.05	0.9221	1.45	0.3741
		thioproline			93176;6973609	0.77	0.0582	0.99	0.5852	0.93	0.6049
		indoleacetylglycine			446640	0.48	0.005	1.23	0.4122	1.4	0.3738
	Leucine, Isoleucine and Valine Metabolism	leucine	C00123	HMDB00687	6106	0.77	0.0096	0.89	0.3161	0.84	0.0688
		N-acetylleucine	C02710	HMDB11756	70912	0.32	8.1078e-05	0.98	0.6782	1.16	0.4471
		4-methyl-2-oxopentanoate	C00233	HMDB00695	70	0.13	1.738e-11	1.71	0.0051	2.25	9.1325e-05
		isovalerate	C08262	HMDB00718	10430	0.26	0.0073	1.74	0.3381	1.83	0.117
		isovalerylglycine		HMDB00678	546304	0.03	1.1676e-11	1.6	0.1227	1.1	0.9319
		isovalerylcarnitine (C5)		HMDB00688	6426851	0.23	6.445e-07	1.33	0.2447	1.1	0.6384
		3-methylcrotonylglycine		HMDB00459	169485	0.21	5.3789e-08	0.9	0.6103	0.82	0.3062
		beta-hydroxyisovalerate		HMDB00754	69362	0.75	0.0058	1.14	0.1617	1.15	0.1616
		3-methylglutaconate		HMDB00522	1551553	0.78	0.3061	0.87	0.6837	0.72	0.1164
		alpha-hydroxyisovalerate		HMDB00407	99823	0.97	0.7906	0.93	0.377	0.88	0.1832
		methylsuccinate		HMDB01844	10349	0.65	0.0459	1.02	0.655	1.12	0.4554
		isoleucine	C00407	HMDB00172	6306	0.8	0.0114	0.88	0.1373	0.83	0.0273
		N-acetylisoleucine			2802421	0.49	0.0002	1.02	0.6494	0.96	0.9444
		3-methyl-2-oxobutyrate	C00141	HMDB00019	49	0.48	9.1902e-05	1.42	0.0337	1.25	0.1545
		3-methyl-2-oxovalerate	C00671	HMDB03736	47	0.34	6.4179e-08	1.58	0.0052	1.6	0.0028
		2-methylbutyrylcarnitine (C5)		HMDB00378	6426901	0.25	0.0003	1.21	0.6846	1.24	0.3752
		2-methylbutyrylglycine		HMDB00339	193872	0.17	2.8972e-05	2.43	0.0838	1.68	0.1406
		tiglylcarnitine (C5:1-DC)		HMDB02366	22833596	0.15	3.09e-10	0.93	0.8554	0.79	0.4095
		tigloylglycine		HMDB00959	6441567	0.06	3.6551e-05	0.98	0.627	1.8	0.5813
		2-hydroxy-3-methylvalerate		HMDB00317	164623	0.93	0.4678	1.08	0.6844	1	0.7878
		3-hydroxy-2-ethylpropionate		HMDB00396	188979	0.89	0.4322	0.76	0.3652	1.02	0.7582
		ethylmalonate		HMDB00622	11756	0.53	0.0006	1.47	0.0469	1.12	0.5094
		valine	C00183	HMDB00883	6287	0.74	5.6507e-05	0.83	0.0059	0.73	2.2684e-05
		N-acetylvaline		HMDB11757	66789	0.54	0.0021	1.07	0.723	1.07	0.7218
		isobutyrylcarnitine (C4)		HMDB00736	168379	0.23	0.0027	3.06	0.1446	1.95	0.1979
		isobutyrylglycine		HMDB00730	10855600	0	3.26e-13	1.27	0.5728	0.97	0.8958
		3-hydroxyisobutyrate	C06001	HMDB00336	87	0.43	0.0001	1.3	0.1547	1.36	0.139
		alpha-hydroxyisocaproate	C03264	HMDB00746	83697	0.76	0.1239	0.96	0.8599	0.94	0.9863
	Methionine, Cysteine, SAM and Taurine Metabolism	methionine	C00073	HMDB00696	6137	0.72	0.0028	1.38	0.0041	1.07	0.285
		N-acetylmethionine	C02712	HMDB11745	448580	0.34	4.5293e-06	1.38	0.0712	1.63	0.0146
		N-formylmethionine	C03145	HMDB01015	439750	0.02	1.7e-14	1.09	0.7039	1.14	0.57
		methionine sulfone			69961	0.64	1.4571e-05	0.99	0.8343	0.65	2.0386e-05
		methionine sulfoxide	C02989	HMDB02005	158980	0.58	7.8523e-05	1.07	0.5277	0.84	0.2281
		S-adenosylhomocysteine (SAH)	C00021	HMDB00939	439155	2.83	0.2351	3.6	0.6394	10.19	0.144
		cystathionine	C02291	HMDB00099	439258	0.54	0.0015	1	0.8057	0.97	0.9497
		cysteine	C00097	HMDB00574	5862	0.56	0.0007	0.96	0.5629	0.93	0.6227
		cystine	C00491	HMDB00192	67678	0.76	0.596	1.42	0.2501	1.12	0.5809
		S-methylcysteine		HMDB02108	24417	1.47	0.1327	0.86	0.613	1.38	0.4873
		cysteine s-sulfate	C05824	HMDB00731	115015	0.46	0.0199	1.33	0.2681	1.87	0.0435
		hypotaurine	C00519	HMDB00965	107812	0.35	0.0001	0.63	0.2122	0.79	0.5908
		taurine	C00245	HMDB00251	1123	0.42	8.7296e-07	1.09	0.9219	0.82	0.1845
		N-acetyltaurine			159864	0.96	0.5866	0.88	0.6463	1.19	0.5228
		2-hydroxybutyrate/2-hydroxyisobutyrate				1.03	0.2325	0.93	0.6183	1.07	0.5095
	Urea cycle; Arginine and Proline Metabolism	arginine	C00062	HMDB00517	232	1.12	0.1237	0.72	5.9906e-05	0.64	1.3614e-06
		urea	C00086	HMDB00294	1176	1.04	0.8544	0.7	0.0025	0.52	1.3068e-06
		ornithine	C00077	HMDB03374	6262	1.01	0.8682	0.85	0.073	0.59	5.583e-05
		proline	C00148	HMDB00162	145742	0.91	0.5013	0.86	0.2564	0.72	0.0167
		citrulline	C00327	HMDB00904	9750	0.84	0.0087	0.95	0.3747	0.86	0.0203
		argininosuccinate	C03406	HMDB00052	16950;828	1.06	0.5408	0.76	0.6879	0.62	0.2985
		homoarginine	C01924	HMDB00670	9085	0.76	0.1065	1.06	0.6967	1.08	0.6451
		homocitrulline	C02427	HMDB00679	65072	0.26	1.9007e-09	0.97	0.6659	1.03	0.8458
		dimethylarginine (SDMA + ADMA)	C03626	HMDB01539	123831	1.18	0.2375	0.93	0.5763	0.82	0.1782
		N-acetylarginine	C02562	HMDB04620	67427	0.47	1.7537e-05	0.85	0.2939	0.55	0.0002
		N-delta-acetylornithine			9920500	0.18	2.2316e-09	0.77	0.1585	0.68	0.043
		N2,N5-diacetylornithine			10398396	0.48	2.5355e-08	1.03	0.7342	0.87	0.1991
		N-methylproline			557	0.63	2.1697e-05	1.13	0.2102	1.1	0.4299
		trans-4-hydroxyproline	C01157	HMDB00725	5810	0.37	9.6551e-09	1.13	0.2731	1.01	0.9668
		pro-hydroxy-pro		HMDB06695	11673055	0.56	0.0645	1.21	0.6683	1.41	0.682
		N-monomethylarginine	C03884	HMDB29416	132862	1.34	0.0221	0.7	0.0056	0.52	8.4185e-06
		N-acetylcitrulline	C15532	HMDB00856	656979	0.55	0.0004	0.87	0.3491	0.69	0.0202
		2-oxoarginine*	C03771	HMDB04225	558	0.57	1.252e-05	0.89	0.2688	0.64	0.0002
	Creatine Metabolism	creatine	C00300	HMDB00064	586	0.39	4.0722e-10	0.98	0.7775	1	0.9521
		creatinine	C00791	HMDB00562	588	0.62	9.1972e-07	1.15	0.0639	1.03	0.6732
		guanidinoacetate	C00581	HMDB00128	763	0.72	0.353	0.98	0.5356	0.77	0.2326
	Polyamine Metabolism	spermidine	C00315	HMDB01257	1102	0.72	0.2403	0.69	0.3052	0.65	0.115
		5-methylthioadenosine (MTA)	C00170	HMDB01173	439176	0.41	2.0582e-05	1.85	0.0036	1.28	0.1515
		N-acetylputrescine	C02714	HMDB02064	122356	0.53	0.0278	2.03	0.0367	1.85	0.0348
	Guanidino and Acetamido Metabolism	4-guanidinobutanoate	C01035	HMDB03464	500	0.71	0.0933	0.59	0.0216	0.28	1.1135e-05
	Glutathione Metabolism	glutathione, oxidized (GSSG)	C00127	HMDB03337	65359	0.23	0.0002	1.35	0.8735	1.14	0.9276
		cysteine-glutathione disulfide		HMDB00656	4247235	0.47	0.0013	1.25	0.4591	1.19	0.5083
		S-methylglutathione	C11347		3605667	0.59	0.0457	1.08	0.927	0.77	0.2782
		5-oxoproline	C01879	HMDB00267	7405	2.32	7.3291e-05	0.75	0.1017	0.5	0.0007
Peptide	Gamma-glutamyl Amino Acid	gamma-glutamylalanine		HMDB29142	440103	0.61	0.0923	1.32	0.2833	1.27	0.7304
		gamma-glutamylglutamate	C05282	HMDB11737	92865	0.56	0.0168	1.29	0.7179	0.97	0.7691
		gamma-glutamylglutamine	C05283	HMDB11738	150914	0.9	0.5311	0.87	0.2968	0.94	0.6246
		gamma-glutamylglycine		HMDB11667	165527	0.79	0.1732	0.98	0.8393	0.79	0.1531
		gamma-glutamylhistidine			7017195	0.89	0.3848	1.09	0.4639	0.99	0.8926
		gamma-glutamylisoleucine*		HMDB11170	14253342	0.82	0.1747	0.83	0.2008	0.76	0.0439
		gamma-glutamylleucine		HMDB11171	151023	0.73	0.0191	0.92	0.4837	0.77	0.0224
		gamma-glutamyl-alpha-lysine			65254	0.75	0.1723	0.89	0.6192	0.96	0.7108
		gamma-glutamyl-epsilon-lysine		HMDB03869	7015684;7015685	1.03	0.8861	0.73	0.9604	1.2	0.2952
		gamma-glutamylmethionine		HMDB29155	7009567	0.71	0.056	1.02	0.9168	1.05	0.8204
		gamma-glutamylphenylalanine		HMDB00594	111299	0.96	0.7804	0.84	0.1963	0.65	0.0024
		gamma-glutamylthreonine		HMDB29159		0.67	0.0363	0.93	0.7311	0.83	0.2114
		gamma-glutamyltryptophan		HMDB29160	3989307	0.93	0.6958	0.93	0.8002	0.7	0.0517
		gamma-glutamyltyrosine		HMDB11741	94340	0.94	0.8371	0.89	0.6178	0.74	0.1388
		gamma-glutamylvaline		HMDB11172	7015683	0.75	0.0409	0.88	0.3612	0.77	0.0605
	Dipeptide Derivative	carnosine	C00386	HMDB00033	439224	0.26	4.1642e-08	0.75	0.2065	0.78	0.3426
		anserine	C01262	HMDB00194	112072	0.13	4.8092e-10	0.67	0.1111	0.73	0.2275
	Dipeptide	prolylglycine			7408076;6426709	0.78	0.0899	0.72	0.0411	0.7	0.0298
	Acetylated Peptides	phenylacetylcarnitine				0.36	0.0001	1.43	0.3326	1.44	0.2071
		phenylacetylglycine	C05598	HMDB00821	68144	0.63	0.03	1.02	0.9426	1.32	0.3959
Carbohydrate	Glycolysis, Gluconeogenesis, and Pyruvate Metabolism	1,5-anhydroglucitol (1,5-AG)	C07326	HMDB02712	64960	0.6	1.4825e-06	0.83	0.0439	0.82	0.0295
		glucose	C00031	HMDB00122	79025	0.74	0.0143	1.28	0.0397	1.36	0.0165
		2,3-diphosphoglycerate	C01159	HMDB01294	186004	0.03	0	1	1	1	1
		2-phosphoglycerate	C00631	HMDB03391	59	0.42	0.0094	0.61	0.8806	0.6	0.6976
		3-phosphoglycerate	C00597	HMDB00807	724	0.45	0.0005	0.59	0.0344	0.49	0.0022
		pyruvate	C00022	HMDB00243	1060	1.46	0.0191	0.86	0.3408	0.72	0.0336
		lactate	C00186	HMDB00190	612	1.27	0.396	0.84	0.5378	0.71	0.094
		glycerate	C00258	HMDB00139	752	0.56	0.0043	1.15	0.3281	1.16	0.3099
	Pentose Metabolism	ribose	C00121	HMDB00283	5779	0.13	9.2424e-09	2.02	0.0383	1.69	0.1366
		ribitol	C00474	HMDB00508	6912	1.95	0.2415	0.66	0.6783	0.57	0.2574
		ribonate	C01685	HMDB00867	5460677	0.75	0.0278	1.26	0.0883	1.29	0.0479
		xylose	C00181	HMDB00098	135191	2.37	0.5757	0.8	0.9411	0.49	0.7108
		arabitol/xylitol				1.37	0.9155	0.81	0.9511	0.8	0.9816
		arabonate/xylonate				1.18	0.5568	1.01	0.6315	0.81	0.73
	Fructose, Mannose and Galactose Metabolism	fructose	C00095	HMDB00660	5984	3.45	1.1513e-05	1.43	0.1755	1.24	0.6228
		mannitol/sorbitol	C01507	HMDB00247	5780	6.01	2.0778e-07	0.67	0.2582	0.48	0.0072
		mannose	C00159	HMDB00169	18950	0.98	0.8207	1.46	0.0092	1.74	0.0005
		galactitol (dulcitol)	C01697	HMDB00107	11850	2.77	0.0005	0.72	0.3678	0.49	0.0079
		galactonate	C00880	HMDB00565	128869	0.73	0.077	0.74	0.6718	0.56	0.2136
	Aminosugar Metabolism	glucuronate	C00191	HMDB00127	444791	0.85	0.187	1.21	0.2214	1.13	0.3135
		N-acetylneuraminate	C00270	HMDB00230	439197	0.44	0.0003	1.3	0.131	0.9	0.6737
		erythronate*		HMDB00613	2781043	0.82	0.0849	1.29	0.0405	1.03	0.662
		N-acetylglucosamine/N-acetylgalactosamine				0.55	0.0049	1.29	0.1745	1.26	0.2472
	Advanced Glycation End-product	N6-carboxymethyllysine				0.16	0.0026	3.22	0.0079	2.12	0.0534
Energy	TCA Cycle	citrate	C00158	HMDB00094	311	0.99	0.7666	1.08	0.1265	1.02	0.6058
		aconitate [cis or trans]	C00417	HMDB00072		1.86	2.7259e-07	0.98	0.8962	0.81	0.0362
		alpha-ketoglutarate	C00026	HMDB00208	51	0.81	0.2326	1.19	0.4322	0.88	0.6423
		succinylcarnitine (C4-DC)				0.43	0.0003	0.78	0.3645	0.81	0.6053
		succinate	C00042	HMDB00254	1110	2.05	0.8801	0.68	0.9376	1.04	0.8354
		fumarate	C00122	HMDB00134	444972	1.08	0.4412	0.82	0.9542	0.96	0.8217
		malate	C00149	HMDB00156	525	0.86	0.1872	0.97	0.6919	0.91	0.8422
		itaconate	C00490	HMDB02092	811	0.71	0.1735	1.77	0.0866	1.38	0.499
		tricarballylate	C19806	HMDB31193	14925	0.24	0.0318	0.93	0.4671	2.78	0.0506
	Oxidative Phosphorylation	phosphate	C00009	HMDB01429	1061	1.31	0.0036	1	0.9474	0.87	0.1228
Lipid	Short Chain Fatty Acid	valerate	C00803	HMDB00892	7991	1.75	0.0067	1.07	0.6363	1.36	0.1988
	Medium Chain Fatty Acid	caproate (6:0)	C01585	HMDB00535	8892	0.94	0.7904	1.29	0.5819	0.86	0.4856
		caprylate (8:0)	C06423	HMDB00482	379	2.15	0.074	0.82	0.8765	0.45	0.1035
		10-undecenoate (11:1n1)				0.98	0.6583	1.08	0.4265	1.13	0.3949
		5-dodecenoate (12:1n7)		HMDB00529	5312378	4.19	1.7885e-10	0.84	0.2411	0.8	0.1082
	Long Chain Fatty Acid	myristate (14:0)	C06424	HMDB00806	11005	2.85	8.7179e-10	0.87	0.2123	0.39	9.1622e-09
		myristoleate (14:1n5)	C08322	HMDB02000	5281119	3.04	3.703e-09	0.83	0.1575	0.59	0.0001
		pentadecanoate (15:0)	C16537	HMDB00826	13849	1.63	2.2184e-07	0.76	0.0006	0.56	1.0544e-08
		palmitate (16:0)	C00249	HMDB00220	985	2.86	2.7119e-11	0.71	0.0014	0.41	1.1438e-09
		palmitoleate (16:1n7)	C08362	HMDB03229	445638	2.95	3.4889e-08	0.87	0.2992	0.37	2.5016e-07
		margarate (17:0)		HMDB02259	10465	3.53	5.3608e-11	0.61	0.0003	0.34	2.2514e-09
		10-heptadecenoate (17:1n7)		HMDB60038	5312435	3.73	1.5673e-09	0.66	0.0095	0.29	9.1278e-09
		stearate (18:0)	C01530	HMDB00827	5281	3.28	1.363e-12	0.7	0.0008	0.49	3.5652e-08
		nonadecanoate (19:0)	C16535	HMDB00772	12591	1.65	0.0007	0.71	0.0144	0.39	1.769e-07
		10-nonadecenoate (19:1n9)		HMDB13622	5312513	3.27	2.1557e-08	0.73	0.0498	0.31	4.8873e-08
		arachidate (20:0)	C06425	HMDB02212	10467	1.36	0.0018	0.79	0.019	0.59	7.8625e-06
		eicosenoate (20:1)		HMDB02231	5282768	2.34	2.2339e-05	0.87	0.4829	0.43	6.4911e-05
		behenate (22:0)*	C08281	HMDB00944	8215	0.95	0.9254	0.79	0.1929	0.72	0.0439
		erucate (22:1n9)	C08316	HMDB02068	5281116	1.02	0.4469	0.71	0.0996	0.48	0.0005
		oleate/vaccenate (18:1)				3.65	7.8852e-10	0.85	0.3223	0.4	1.0172e-06
	Polyunsaturated Fatty Acid (n3 and n6)	stearidonate (18:4n3)	C16300	HMDB06547	5312508	0.88	0.5028	0.9	0.7251	0.38	2.712e-05
		eicosapentaenoate (EPA; 20:5n3)	C06428	HMDB01999	446284	0.69	0.0801	0.72	0.2181	0.45	0.0049
		docosapentaenoate (n3 DPA; 22:5n3)	C16513	HMDB01976	6441454	1.45	0.2184	0.55	0.0144	0.43	0.0023
		docosahexaenoate (DHA; 22:6n3)	C06429	HMDB02183	445580	2.23	0.001	0.64	0.0524	0.45	0.0014
		linoleate (18:2n6)	C01595	HMDB00673	5280450	3.03	6.4252e-09	0.8	0.1173	0.4	2.9889e-07
		linolenate [alpha or gamma; (18:3n3 or 6)]	C06426	HMDB03073	5280934	1.63	0.0019	0.88	0.4382	0.38	1.357e-06
		dihomo-linolenate (20:3n3 or n6)	C03242	HMDB02925	5280581	3.45	1.2801e-06	0.73	0.1554	0.51	0.004
		arachidonate (20:4n6)	C00219	HMDB01043	444899	6.27	1.8849e-08	0.75	0.3411	0.41	0.0014
		adrenate (22:4n6)	C16527	HMDB02226	5497181	3.84	6.3526e-06	0.78	0.4983	0.52	0.035
		docosapentaenoate (n6 DPA; 22:5n6)	C16513	HMDB01976	6441454	3.52	7.4174e-06	0.7	0.2525	0.52	0.0213
		docosadienoate (22:2n6)	C16533	HMDB61714	5282807	2.38	1.4597e-05	0.74	0.0945	0.36	3.194e-06
		dihomo-linoleate (20:2n6)	C16525	HMDB05060	6439848	4.08	6.6189e-09	0.86	0.5377	0.44	7.495e-05
		mead acid (20:3n9)		HMDB10378	5312531	4.23	2.2546e-06	0.73	0.3497	0.35	0.0003
	Fatty Acid, Branched	15-methylpalmitate			17903417	3.91	2.65e-13	0.49	1.3055e-07	0.35	5.9259e-11
		17-methylstearate			3083779	2.16	3.3483e-06	0.55	0.0002	0.38	9.4008e-08
	Fatty Acid, Dicarboxylate	2-hydroxyglutarate	C02630	HMDB00606	43	0.92	0.4995	0.95	0.9031	0.83	0.3933
		adipate	C06104	HMDB00448	196	0.73	0.1403	0.96	0.9544	0.96	0.9904
		2-hydroxyadipate	C02360	HMDB00321	193530	0.54	0.055	1.16	0.6672	0.76	0.8016
		3-methyladipate		HMDB00555	12292	0.4	0.0006	1.29	0.2562	1.1	0.5013
		pimelate (heptanedioate)	C02656	HMDB00857	385	0.41	0.0013	1.37	0.1745	0.74	0.3943
		suberate (octanedioate)	C08278	HMDB00893	10457	0.69	0.027	0.95	0.9917	0.91	0.7291
		azelate (nonanedioate)	C08261	HMDB00784	2266	0.93	0.5693	0.75	0.0398	0.6	0.0004
		sebacate (decanedioate)	C08277	HMDB00792	5192	1.28	0.1259	0.75	0.2002	0.69	0.0978
		dodecanedioate	C02678	HMDB00623	12736	1.32	0.0712	0.71	0.0179	0.74	0.036
		tetradecanedioate		HMDB00872	13185	0.85	0.2594	0.73	0.5894	0.62	0.1329
		hexadecanedioate	C19615	HMDB00672	10459	1.35	0.235	0.86	0.4717	0.83	0.3032
		octadecanedioate		HMDB00782	70095	1.42	0.066	0.75	0.0994	0.67	0.0174
		eicosanodioate			75502	0.54	0.0018	1	0.9321	0.77	0.107
	Fatty Acid, Amino	2-aminoheptanoate			227939	2.24	8.6943e-07	0.34	7.2261e-09	0.25	5.0269e-11
		2-aminooctanoate		HMDB00991	69522	2.4	0.0009	0.44	0.0007	0.39	0.0005
	Fatty Acid, Keto	1-dihomo-linoleoylglycerol (20:2)				0.76	0.558	1.86	0.0125	1.36	0.1314
	Fatty Acid Synthesis	malonate	C00383	HMDB00691	867	0.54	7.6648e-05	1.02	0.6932	0.79	0.158
	Fatty Acid Metabolism (also BCAA Metabolism)	butyrylcarnitine (C4)	C02862	HMDB02013	439829	0.34	0.0685	3.31	0.0629	0.79	0.6325
		butyrylglycine		HMDB00808	88412	0.12	0.0001	3.69	0.146	0.81	0.5
		propionylcarnitine	C03017	HMDB00824	107738	0.44	0.0093	1	0.7321	0.92	0.9144
		propionylglycine		HMDB00783	98681	0.42	0.0001	0.95	0.7245	0.88	0.5461
		methylmalonate (MMA)	C02170	HMDB00202	487	1.32	0.9863	0.73	0.7236	0.7	0.6455
	Fatty Acid Metabolism(Acyl Glycine)	hexanoylglycine		HMDB00701	99463	0.27	0.0058	4.03	0.0302	1.32	0.5233
		3,4-methylene heptanoylglycine				2.79	0.0178	1.14	0.735	1.45	0.4976
		N-palmitoylglycine			151008	1.47	0.0277	0.68	0.0283	0.68	0.0289
	Fatty Acid Metabolism(Acyl Carnitine)	acetylcarnitine (C2)	C02571	HMDB00201	1	0.31	1.1498e-06	1.16	0.3862	1.28	0.2209
		3-hydroxybutyrylcarnitine (1)		HMDB13127	53481617	0.31	4.5153e-06	1.27	0.278	1.51	0.0878
		3-hydroxybutyrylcarnitine (2)				0.34	0.0025	0.71	0.719	0.99	0.5171
		hexanoylcarnitine (C6)		HMDB00705	6426853	0.07	2.5491e-06	2.65	0.3086	2.16	0.1604
		decanoylcarnitine (C10)		HMDB00651	10245190	0.68	0.164	0.83	0.5501	1.51	0.3121
		cis-4-decenoylcarnitine (C10:1)				0.19	1.9862e-07	0.97	0.8896	1.44	0.1943
		laurylcarnitine (C12)		HMDB02250	10427569	0.59	0.0574	0.68	0.2291	1.44	0.1993
		myristoylcarnitine (C14)		HMDB05066	53477791	1.55	0.0644	0.76	0.2552	1.05	0.6561
		palmitoylcarnitine (C16)	C02990	HMDB00222	461	1.35	0.1925	0.56	0.0094	0.82	0.3992
		palmitoleoylcarnitine (C16:1)*				0.6	0.1804	0.71	0.2923	1.92	0.0963
		stearoylcarnitine (C18)		HMDB00848	6426855	1.84	2.0628e-06	0.83	0.0631	1.02	0.8822
		linoleoylcarnitine (C18:2)*		HMDB06469	6450015	0.18	0.0001	0.44	0.0544	1.03	0.6763
		oleoylcarnitine (C18:1)		HMDB05065	6441392;53477789	0.61	0.1472	0.48	0.0262	1.39	0.3992
		myristoleoylcarnitine (C14:1)*				0.18	0.0002	1.56	0.325	7.19	2.3602e-05
	Carnitine Metabolism	deoxycarnitine	C01181	HMDB01161	134	0.39	1.5409e-07	1.03	0.9107	0.79	0.0928
		carnitine	C00318	HMDB00062	10917	0.49	5.1536e-10	1.16	0.0623	1.2	0.0216
	Ketone Bodies	3-hydroxybutyrate (BHBA)	C01089	HMDB00357	441	0.4	0.0004	1	0.9513	1.3	0.3995
	Fatty Acid, Monohydroxy	2-hydroxyoctanoate		HMDB02264	94180	0.82	0.3446	0.66	0.1713	0.71	0.2071
		2-hydroxydecanoate			21488	1.03	0.7668	0.79	0.1588	0.73	0.0262
		2-hydroxypalmitate		HMDB31057	92836	3.38	8.371e-12	0.76	0.0138	0.58	2.5615e-05
		2-hydroxystearate	C03045		69417	4.72	6.823e-10	0.79	0.2036	0.54	0.0013
		3-hydroxyhexanoate			151492	0.83	0.4738	1.35	0.5935	1.26	0.5698
		3-hydroxyoctanoate		HMDB01954	26613	1.46	0.2518	1.02	0.93	1.23	0.8897
		3-hydroxydecanoate		HMDB02203	26612	2.27	0.0108	0.87	0.5525	1.04	0.6323
		3-hydroxysebacate		HMDB00350	3017884	0.73	0.0643	1.13	0.4467	1.08	0.6676
		3-hydroxylaurate		HMDB00387	94216	3.6	0.0002	1.04	0.9301	1.03	0.6244
		5-hydroxyhexanoate		HMDB00525	170748	1.3	0.8915	0.78	0.683	0.78	0.7961
		16-hydroxypalmitate	C18218	HMDB06294	10466	1.57	0.0025	0.84	0.218	0.64	0.0028
		13-HODE + 9-HODE			43013	4.4	3.2196e-11	0.41	3.9472e-07	0.15	9.6e-14
		14-HDoHE/17-HDoHE				2.56	0.0026	0.53	0.0399	0.46	0.0023
	Fatty Acid, Dihydroxy	12,13-DiHOME	C14829	HMDB04705	10236635	3.19	5.2095e-06	0.47	0.0008	0.13	2.1042e-10
		9,10-DiHOME	C14828	HMDB04704	9966640	2.99	5.3512e-07	0.46	6.0784e-05	0.15	1.0789e-11
	Eicosanoid	12-HEPE		HMDB10202	10041593	1.78	0.2724	0.28	0.0053	0.38	0.0014
		12-HETE		HMDB06111	5312983	11.99	3.3842e-05	0.32	0.0258	0.53	0.0164
	Endocannabinoid	oleoyl ethanolamide		HMDB02088	5283454	2.29	1.5235e-06	0.81	0.0756	0.64	0.0024
		palmitoyl ethanolamide	C16512	HMDB02100	4671	1.76	2.0244e-05	0.75	0.0093	0.67	0.0009
		stearoyl ethanolamide		HMDB13078	27902	2.08	3.5532e-08	0.84	0.053	0.73	0.0024
		N-oleoyltaurine			6437033	1.64	0.074	0.99	0.8918	1.05	0.5885
		N-stearoyltaurine			168274	2.27	4.6648e-06	0.62	0.0021	0.6	0.0009
		N-palmitoyltaurine				1.33	0.065	0.78	0.1403	0.67	0.0172
		linoleoyl ethanolamide		HMDB12252	5283446	1.22	0.24	0.7	0.0182	0.62	0.005
	Inositol Metabolism	myo-inositol	C00137	HMDB00211	892	0.48	0.0008	1.05	0.939	0.7	0.1666
		chiro-inositol	C19891	HMDB34220		1.42	0.1329	0.81	0.2822	0.43	0.0006
	Phospholipid Metabolism	choline	C00114	HMDB00097	305	1.47	0.0475	0.72	0.0756	0.6	0.0069
		choline phosphate	C00588	HMDB01565	1014	0.1	9.9787e-08	2.32	0.1812	0.8	0.7003
		glycerophosphorylcholine (GPC)	C00670	HMDB00086	71920	4.21	1.67e-13	0.69	0.0011	0.38	9.3404e-10
		phosphoethanolamine	C00346	HMDB00224	1015	0.37	2.1926e-06	1.5	0.1018	0.73	0.0683
		glycerophosphoethanolamine	C01233	HMDB00114	123874	1.39	0.0746	0.6	0.0076	0.23	1.1472e-07
		trimethylamine N-oxide	C01104	HMDB00925	1145	0.94	0.9524	0.36	0.007	0.4	0.0053
		glycerophosphoinositol*				1.11	0.9279	1.28	0.2122	0.77	0.7004
		1,2-dipalmitoyl-GPC (16:0/16:0)		HMDB00564	452110	0.97	0.7379	0.93	0.3166	0.81	0.0195
		1,2-dipalmitoyl-GPE (16:0/16:0)*			11802774;445468	1.15	0.3373	0.73	0.384	0.63	0.1721
		1-palmitoyl-2-oleoyl-GPC (16:0/18:1)			6436017	1	0.9347	0.94	0.5349	0.79	0.0314
		1-palmitoyl-2-linoleoyl-GPC (16:0/18:2)			5287971	0.95	0.5544	0.93	0.4042	0.76	0.0064
		1-stearoyl-2-arachidonoyl-GPC (18:0/20:4)			16219824	1.33	0.0025	1.39	0.0006	1.21	0.0266
		1-stearoyl-2-oleoyl-GPC (18:0/18:1)				1.31	0.0203	0.98	0.8407	0.8	0.0606
		1-palmitoyl-2-arachidonoyl-GPC (16:0/20:4n6)			10747814	1.04	0.6196	1.23	0.0206	1.11	0.2274
		1-stearoyl-2-linoleoyl-GPC (18:0/18:2)*				1.1	0.342	1.01	0.9949	0.78	0.0281
		1-linoleoyl-2-linolenoyl-GPC (18:2/18:3)*				0.61	0.0123	0.79	0.2828	0.57	0.0109
		1-palmitoyl-2-palmitoleoyl-GPC (16:0/16:1)*				0.71	0.0127	1	0.7426	0.8	0.2461
		1-stearoyl-2-arachidonoyl-GPI (18:0/20:4)				1.25	0.0134	0.99	0.7338	0.87	0.1071
		1-palmitoyl-2-linoleoyl-GPI (16:0/18:2)				0.91	0.5656	0.6	0.0067	0.47	0.0002
		1-palmitoyl-2-arachidonoyl-GPI (16:0/20:4)*				0.76	0.0794	0.9	0.5964	0.82	0.2528
		1-stearoyl-2-linoleoyl-GPI (18:0/18:2)				1.21	0.4212	0.59	0.0103	0.49	0.0016
		1-palmitoyl-2-oleoyl-GPE (16:0/18:1)		HMDB05320	5283496	1.27	0.4389	1.02	0.5156	0.94	0.6826
		1-stearoyl-2-arachidonoyl-GPE (18:0/20:4)			5289133	1.43	0.0618	1.65	0.0504	2.24	0.0034
		1-stearoyl-2-oleoyl-GPE (18:0/18:1)				2.15	0.007	0.84	0.8807	0.76	0.662
		1-palmitoyl-2-arachidonoyl-GPE (16:0/20:4)*		HMDB05323	9546800	1.05	0.619	1.59	0.0745	2.19	0.0071
		1-palmitoyl-2-linoleoyl-GPE (16:0/18:2)		HMDB05322	9546747	0.85	0.6457	1	0.5901	0.98	0.5008
		1-stearoyl-2-linoleoyl-GPE (18:0/18:2)*			9546749	1.07	0.6516	1.08	0.455	0.98	0.5899
		1-palmitoyl-2-stearoyl-GPC (16:0/18:0)				1.37	0.0034	0.93	0.2915	0.78	0.0201
		1-palmitoleoyl-2-linoleoyl-GPC (16:1/18:2)*				1.09	0.4922	1.19	0.2469	1.04	0.8368
		1,2-dilinoleoyl-GPC (18:2/18:2)			5288075	1.24	0.3167	0.68	0.0492	0.53	0.002
		1-oleoyl-2-linoleoyl-GPE (18:1/18:2)*		HMDB05349	9546753	0.64	0.3106	1.07	0.2689	1.24	0.132
		1,2-distearoyl-GPC (18:0/18:0)			94190	2.23	0.0002	1.17	0.3717	0.87	0.6369
		1-linoleoyl-2-arachidonoyl-GPC (18:2/20:4n6)*				1.49	0.008	1.15	0.4022	0.89	0.3913
		1-linoleoyl-2-arachidonoyl-GPE (18:2/20:4)*				1.27	0.1377	0.73	0.4082	1.02	0.8156
		1-oleoyl-2-arachidonoyl-GPI (18:1/20:4) *				1.03	0.8362	0.93	0.6983	0.76	0.1503
		1-palmitoyl-2-gamma-linolenoyl-GPC (16:0/18:3n6)*				0.75	0.0619	1.07	0.5819	0.88	0.5555
	Phosphatidylserine (PS)	1-stearoyl-2-arachidonoyl-GPS (18:0/20:4)				0.21	2.2364e-05	1.28	0.3889	1.15	0.4382
	Lysolipid	1-palmitoyl-GPC (16:0)		HMDB10382	86554	1.4	0.0002	0.87	0.0651	0.77	0.0018
		2-palmitoyl-GPC (16:0)*		HMDB61702	15061532	1.55	0.0029	0.68	0.0091	0.57	0.0004
		1-palmitoleoyl-GPC (16:1)*		HMDB10383	24779461	1.31	0.0402	0.94	0.5753	0.68	0.0095
		2-palmitoleoyl-GPC (16:1)*				1.42	0.0684	0.75	0.0972	0.55	0.0124
		1-stearoyl-GPC (18:0)		HMDB10384	497299	1.54	0.0002	0.94	0.5067	0.8	0.035
		1-oleoyl-GPC (18:1)		HMDB02815	16081932	1.66	2.0253e-05	0.87	0.1133	0.71	0.0016
		1-linoleoyl-GPC (18:2)	C04100	HMDB10386	11988421	1.71	1.7873e-05	0.73	0.0031	0.6	4.0484e-05
		1-linolenoyl-GPC (18:3)*				1.28	0.0924	0.79	0.1206	0.58	0.0014
		1-arachidonoyl-GPC (20:4n6)*	C05208	HMDB10395		1.94	2.5804e-07	1.13	0.2609	1	0.9047
		1-lignoceroyl-GPC (24:0)				0.88	0.319	0.94	0.4927	0.88	0.2842
		1-palmitoyl-GPE (16:0)		HMDB11503	9547069	2.57	2.7737e-06	0.96	0.8194	0.93	0.6995
		1-stearoyl-GPE (18:0)		HMDB11130	9547068	3.25	3.0536e-07	0.97	0.8292	0.93	0.725
		2-stearoyl-GPE (18:0)*				3.41	1.3888e-07	0.78	0.1936	0.73	0.1215
		1-oleoyl-GPE (18:1)		HMDB11506	9547071	6.19	1.0147e-09	0.88	0.4893	0.66	0.059
		1-linoleoyl-GPE (18:2)*		HMDB11507	52925130	7.29	9.5226e-11	0.63	0.0289	0.39	8.705e-05
		1-arachidonoyl-GPE (20:4n6)*		HMDB11517	42607465	10.23	4.9e-14	1.04	0.8672	0.76	0.094
		1-palmitoyl-GPI (16:0)		HMDB61695		2.43	0.008	0.54	0.0518	0.29	0.0007
		1-stearoyl-GPI (18:0)		HMDB61696		3.04	0.0024	0.53	0.0652	0.44	0.0239
		1-oleoyl-GPI (18:1)*				8.72	0.0001	0.24	0.002	0.1	6.7113e-05
		1-linoleoyl-GPI (18:2)*				5.45	1.7524e-10	0.37	1.9329e-06	0.2	5.2574e-10
		1-arachidonoyl-GPI (20:4)*		HMDB61690		5.66	3.402e-12	0.61	0.0012	0.35	8.1214e-08
		1-arachidonoyl-GPA (20:4)				1.34	0.5088	1.97	0.1089	2.05	0.0523
		1-palmitoyl-GPG (16:0)*			3300276	2.18	7.8997e-05	0.65	0.0176	0.39	4.5969e-06
		1-oleoyl-GPG (18:1)*				7.14	1.8283e-08	0.63	0.116	0.27	2.3257e-05
		1-linoleoyl-GPG (18:2)*				3	2.5302e-07	0.78	0.1213	0.51	0.0003
		1-linoleoyl-GPA (18:2)*		HMDB07856		0.75	0.3476	1.11	0.8781	1.05	0.8148
	Plasmalogen	1-(1-enyl-palmitoyl)-2-oleoyl-GPE (P-16:0/18:1)*				1.8	0.0004	0.82	0.2158	0.77	0.0582
		1-(1-enyl-palmitoyl)-2-linoleoyl-GPE (P-16:0/18:2)*				2.64	0.0154	0.75	0.4835	0.86	0.5827
		1-(1-enyl-palmitoyl)-2-palmitoyl-GPC (P-16:0/16:0)*			11146967	1.12	0.4065	0.76	0.1066	1.03	0.9446
		1-(1-enyl-palmitoyl)-2-arachidonoyl-GPE (P-16:0/20:4)*				4.26	2.8112e-07	0.85	0.5303	0.81	0.3929
		1-(1-enyl-palmitoyl)-2-oleoyl-GPC (P-16:0/18:1)*				2.13	0.0006	0.85	0.3333	1.07	0.9282
		1-(1-enyl-stearoyl)-2-oleoyl-GPE (P-18:0/18:1)				6.74	1.1413e-07	0.71	0.2449	0.69	0.1403
		1-(1-enyl-stearoyl)-2-linoleoyl-GPE (P-18:0/18:2)*				3.2	8.3187e-05	0.85	0.6523	0.79	0.4599
		1-(1-enyl-palmitoyl)-2-arachidonoyl-GPC (P-16:0/20:4)*				2.14	2.6707e-06	0.82	0.0969	0.84	0.1729
		1-(1-enyl-palmitoyl)-2-linoleoyl-GPC (P-16:0/18:2)*				1.27	0.1166	0.64	0.0032	0.53	0.0001
		1-(1-enyl-stearoyl)-2-arachidonoyl-GPE (P-18:0/20:4)*		HMDB05779	9547058	4.86	6.7378e-08	0.95	0.7804	0.88	0.5994
	Lysoplasmalogen	1-(1-enyl-palmitoyl)-GPC (P-16:0)*			10917802	1.52	0.0005	0.91	0.254	0.86	0.1463
		1-(1-enyl-palmitoyl)-GPE (P-16:0)*				5.41	3.4297e-07	0.7	0.2056	0.61	0.1078
		1-(1-enyl-oleoyl)-GPE (P-18:1)*				7.62	2.2385e-09	0.7	0.0805	0.54	0.0201
		1-(1-enyl-stearoyl)-GPE (P-18:0)*				5.17	1.1959e-09	0.92	0.6163	0.76	0.1628
	Glycerolipid Metabolism	glycerol	C00116	HMDB00131	753	1.54	0.1533	0.78	0.4649	0.77	0.2029
		glycerol 3-phosphate	C00093	HMDB00126	754	0.45	0.0112	1.4	0.7055	0.98	0.889
		glycerophosphoglycerol	C03274		439964	0.27	0.0002	1.55	0.1318	0.64	0.805
	Monoacylglycerol	1-myristoylglycerol (14:0)	C01885	HMDB11561	79050	0.88	0.3667	1.29	0.0702	0.86	0.1702
		2-myristoylglycerol (14:0)			137938	0.91	0.3412	1.09	0.3166	0.44	0.1074
		1-palmitoylglycerol (16:0)		HMDB31074	14900	1.16	0.3939	1.01	0.8218	0.65	0.0041
		2-palmitoylglycerol (16:0)		HMDB11533	123409	0.96	0.4421	0.8	0.8919	0.67	0.6874
		1-oleoylglycerol (18:1)		HMDB11567	5283468	1.02	0.8837	1.16	0.3697	1.04	0.6266
		2-oleoylglycerol (18:1)			5319879	0.63	0.0375	1.1	0.5658	0.94	0.895
		1-linoleoylglycerol (18:2)			5283469	0.52	0.0002	1.72	0.0008	1.47	0.0076
		2-linoleoylglycerol (18:2)		HMDB11538	5365676	0.42	0.0002	1.42	0.0919	1.36	0.1468
		1-linolenoylglycerol (18:3)		HMDB11569	53480978	0.33	9.7474e-09	1.34	0.0182	1.1	0.2908
		1-arachidonylglycerol (20:4)	C13857	HMDB11572	5282281	0.28	5.9532e-07	1.34	0.0828	1.9	0.0013
		2-arachidonoylglycerol (20:4)	C13856	HMDB04666	5282280	0.26	3.2669e-06	1.29	0.316	1.7	0.0354
		1-docosahexaenoylglycerol (22:6)		HMDB11587		0.11	1.653e-09	1.37	0.1797	3.17	3.0335e-05
		1-dihomo-linolenylglycerol (20:3)				0.3	3.1105e-07	1.84	0.001	1.83	0.001
		1-palmitoleoylglycerol (16:1)*				0.46	9.7857e-07	1.36	0.016	0.97	0.8216
		2-palmitoleoylglycerol (16:1)*				0.45	0.0002	0.94	0.498	0.85	0.8122
	Diacylglycerol	diacylglycerol (16:1/18:2 [2], 16:0/18:3 [1])*				0.58	0.0025	1.24	0.2198	0.8	0.1392
		oleoyl-linoleoyl-glycerol (18:1/18:2) [1]				0.94	0.4742	1.48	0.0104	1.16	0.1975
		oleoyl-linoleoyl-glycerol (18:1/18:2) [2]				0.74	0.0385	1.43	0.0197	1.07	0.6338
		oleoyl-arachidonoyl-glycerol (18:1/20:4) [1]*				1.21	0.264	1.1	0.4914	1.13	0.3712
		oleoyl-arachidonoyl-glycerol (18:1/20:4) [2]*				0.84	0.1487	1.33	0.0329	1.23	0.1124
		linoleoyl-arachidonoyl-glycerol (18:2/20:4) [1]*				0.71	0.0787	1.51	0.036	1.79	0.0069
		linoleoyl-arachidonoyl-glycerol (18:2/20:4) [2]*				0.52	0.0087	1.52	0.0545	1.98	0.0052
		linoleoyl-linoleoyl-glycerol (18:2/18:2) [1]*				0.56	0.0041	1.56	0.0187	1.19	0.2083
		linoleoyl-linolenoyl-glycerol (18:2/18:3) [1]*				0.25	1.2057e-07	1.25	0.2627	0.9	0.4828
		linoleoyl-docosahexaenoyl-glycerol (18:2/22:6) [1]*				0.17	1.0337e-06	1.27	0.233	2.66	0.001
		linoleoyl-docosahexaenoyl-glycerol (18:2/22:6) [2]*				0.09	9.5359e-07	1.82	0.0478	2.59	0.0087
		palmitoyl-arachidonoyl-glycerol (16:0/20:4) [1]*				0.87	0.5376	1.68	0.083	1.92	0.0258
		palmitoyl-arachidonoyl-glycerol (16:0/20:4) [2]*				0.88	0.5765	1.36	0.2729	1.1	0.9532
		palmitoleoyl-linoleoyl-glycerol (16:1/18:2) [1]*				0.44	4.6374e-05	1.84	0.0012	1.37	0.0539
		palmitoyl-oleoyl-glycerol (16:0/18:1) [2]*				1.14	0.9385	0.96	0.9643	0.5	0.1999
		palmitoyl-linoleoyl-glycerol (16:0/18:2) [1]*		HMDB05207 HMDB07103	9543695	0.94	0.9634	1.24	0.2	0.88	0.5245
		palmitoyl-linoleoyl-glycerol (16:0/18:2) [2]*				0.8	0.1536	1.17	0.2777	0.71	0.2059
		oleoyl-oleoyl-glycerol (18:1/18:1) [1]*				1.25	0.3836	1.35	0.1471	0.81	0.4535
		oleoyl-oleoyl-glycerol (18:1/18:1) [2]*				0.9	0.8768	1.14	0.5954	0.84	0.3065
	Sphingolipid Metabolism	sphinganine	C00836	HMDB00269	3126	1.58	0.1755	1.52	0.1481	1.64	0.0695
		sphinganine-1-phosphate		HMDB01383	520	0.65	0.0243	1.88	0.0018	3.56	6.3016e-07
		N-palmitoyl-sphinganine (d18:0/16:0)		HMDB11760	5283572	1.29	0.0862	0.85	0.2894	0.37	6.1246e-07
		myristoyl dihydrosphingomyelin (d18:0/14:0)*				2.45	4.566e-05	0.69	0.055	0.79	0.1195
		palmitoyl dihydrosphingomyelin (d18:0/16:0)*			9939965	1.61	0.0008	0.68	0.0048	0.78	0.0392
		behenoyl dihydrosphingomyelin (d18:0/22:0)*				1.16	0.3669	0.92	0.5341	0.93	0.6192
		palmitoyl sphingomyelin (d18:1/16:0)			9939941	1.26	0.0025	0.91	0.1664	0.98	0.7142
		stearoyl sphingomyelin (d18:1/18:0)	C00550	HMDB01348	6453725	1.91	2.6475e-05	0.97	0.7648	1.21	0.1133
		behenoyl sphingomyelin (d18:1/22:0)*				0.94	0.7142	1.21	0.3199	1	0.9807
		tricosanoyl sphingomyelin (d18:1/23:0)*				1	0.9397	0.9	0.4998	0.88	0.4934
		lignoceroyl sphingomyelin (d18:1/24:0)				0.83	0.275	0.94	0.5131	0.96	0.7617
		sphingomyelin (d18:1/14:0, d16:1/16:0)*			11433862	1.95	0.002	1.16	0.5078	1	0.8668
		sphingomyelin (d18:2/14:0, d18:1/14:1)*				1.54	0.0517	0.96	0.6616	0.91	0.5855
		sphingomyelin (d18:1/15:0, d16:1/17:0)*				1.45	0.0302	0.85	0.3071	0.84	0.2479
		sphingomyelin (d18:2/16:0, d18:1/16:1)*				1.46	0.008	0.97	0.7149	1	0.9054
		sphingomyelin (d18:1/18:1, d18:2/18:0)			6443882	2.45	4.4383e-08	0.81	0.0761	1.03	0.8617
		sphingomyelin (d18:1/20:0, d16:1/22:0)*				1.13	0.3706	1.1	0.5646	1.1	0.551
		sphingomyelin (d18:1/20:1, d18:2/20:0)*				1.82	0.0005	0.93	0.6133	1.1	0.6319
		sphingomyelin (d18:1/21:0, d17:1/22:0, d16:1/23:0)*				1.04	0.7962	0.99	0.8322	0.93	0.6901
		sphingomyelin (d18:1/22:1, d18:2/22:0, d16:1/24:1)*				1.07	0.597	1.21	0.2329	1.12	0.4529
		sphingomyelin (d18:2/23:0, d18:1/23:1, d17:1/24:1)*				1.03	0.8544	1.02	0.9563	0.89	0.5359
		sphingomyelin (d18:1/24:1, d18:2/24:0)*				1.02	0.938	1.1	0.2961	0.91	0.4757
		sphingomyelin (d18:2/24:1, d18:1/24:2)*				0.96	0.533	1.28	0.0059	1.07	0.3554
		sphingosine	C00319	HMDB00252	5353955	3.71	0.0003	1.2	0.3694	1.17	0.4151
		sphingosine 1-phosphate	C06124	HMDB00277	5283560	1.08	0.7548	1.08	0.3984	1.25	0.0623
		N-palmitoyl-sphingosine (d18:1/16:0)		HMDB04949	5283564	0.76	0.0384	0.91	0.4367	0.78	0.0319
		N-stearoyl-sphingosine (d18:1/18:0)*		HMDB04950	5283565	1.96	0.0003	0.93	0.6445	0.87	0.4502
		glycosyl-N-palmitoyl-sphingosine (d18:1/16:0)				1.29	0.0511	0.97	0.8726	0.99	0.8608
		glycosyl-N-stearoyl-sphingosine (d18:1/18:0)				2.64	2.8988e-05	0.87	0.5274	0.93	0.7538
	Mevalonate Metabolism	3-hydroxy-3-methylglutarate	C03761	HMDB00355	1662	0.88	0.2552	0.91	0.8714	0.81	0.509
	Sterol	cholesterol	C00187	HMDB00067	11025495	0.94	0.4887	1.1	0.4094	0.98	0.8281
		7-alpha-hydroxy-3-oxo-4-cholestenoate (7-Hoca)	C17337	HMDB12458	3081085	0.85	0.3179	1.04	0.7532	0.79	0.0578
		beta-sitosterol	C01753	HMDB00852	222284	1.45	0.0616	0.85	0.4452	0.76	0.2055
		campesterol	C01789	HMDB02869	173183	1.3	0.1037	0.93	0.551	0.82	0.2333
	Steroid	corticosterone	C02140	HMDB01547	5753	0.4	0.0276	1.34	0.9384	1.16	0.784
	Primary Bile Acid Metabolism	cholate	C00695	HMDB00619	221493	0.57	0.1091	1.91	0.1714	0.71	0.88
		taurocholate	C05122	HMDB00036	6675	0.25	0.0147	0.6	0.9293	0.47	0.4711
		taurochenodeoxycholate	C05465	HMDB00951	387316	0.33	0.0814	0.52	0.8204	0.56	0.466
		beta-muricholate	C17726	HMDB00415	5283853	1.52	0.6312	1.05	0.3289	0.61	0.5017
		tauro-beta-muricholate		HMDB00932	168408	0.66	0.1845	0.47	0.7916	0.36	0.3181
	Secondary Bile Acid Metabolism	deoxycholate	C04483	HMDB00626	222528	0.83	0.4548	0.96	0.8772	1.02	0.9126
		taurodeoxycholate	C05463	HMDB00896	2733768	0.32	0.039	0.72	0.8157	0.78	0.8975
		taurolithocholate 3-sulfate	C03642	HMDB02580	440071	1.5	0.92	0.43	0.5016	0.4	0.3199
		ursodeoxycholate	C07880	HMDB00946	31401	1.78	0.6174	1.03	0.3665	0.56	0.9091
		tauroursodeoxycholate		HMDB00874	9848818	0.42	0.1233	0.6	0.9053	0.48	0.4121
		hyodeoxycholate	C15517	HMDB00733	5283820	3.18	0.8014	0.3	0.8722	0.21	0.3894
		taurohyodeoxycholic acid			119046	1.37	0.2337	0.14	0.6206	0.1	0.2707
		taurocholenate sulfate				0.46	0.0225	1.27	0.2297	0.55	0.1922
		7-ketodeoxycholate		HMDB00391	188292	2.19	0.4903	1.3	0.1149	0.34	0.2757
Nucleotide	Purine Metabolism, (Hypo)Xanthine/Inosine containing	inosine	C00294	HMDB00195	6021	3.08	0.2239	0.28	0.8692	1.88	0.3655
		hypoxanthine	C00262	HMDB00157	790	5.74	0.9323	0.1	0.616	2.26	0.4188
		xanthine	C00385	HMDB00292	1188	1.34	0.464	0.33	0.4989	1.87	0.9419
		xanthosine	C01762	HMDB00299	64959	12.79	0.9303	0.31	0.8831	1.94	0.4737
		N1-methylinosine		HMDB02721	65095	1.66	0.0126	1.04	0.8705	0.91	0.5903
		urate	C00366	HMDB00289	1175	1.08	0.4114	1.03	0.5063	1.24	0.6314
		allantoin	C02350	HMDB00462	204	0.74	0.0168	1.45	0.0046	1.26	0.0668
		allantoic acid	C00499	HMDB01209	203	0.75	0.1808	1.35	0.1522	1.02	0.9773
	Purine Metabolism, Adenine containing	adenosine 5'-monophosphate (AMP)	C00020	HMDB00045	6083	0.37	0.0086	0.49	0.5201	0.54	0.2778
		adenosine 3',5'-cyclic monophosphate (cAMP)	C00575	HMDB00058	6076	0.29	1.1155e-06	1.22	0.6345	0.94	0.706
		adenine	C00147	HMDB00034	190	0.46	1.0693e-05	2.04	7.3734e-05	1.88	0.0002
		N1-methyladenosine	C02494	HMDB03331	27476	1.36	0.0887	0.99	0.9694	0.86	0.4279
		N6-carbamoylthreonyladenosine		HMDB41623	161466	0.99	0.821	1.13	0.4977	1.31	0.1605
		N6-succinyladenosine		HMDB00912		1.37	0.8787	0.88	0.6385	0.92	0.6153
	Purine Metabolism, Guanine containing	7-methylguanine	C02242	HMDB00897	11361	0.94	0.5883	1.25	0.1104	1.25	0.1556
		N2,N2-dimethylguanosine		HMDB04824	92919	3	5.325e-05	0.84	0.3892	0.61	0.0425
	Pyrimidine Metabolism, Orotate containing	N-carbamoylaspartate	C00438	HMDB00828	93072	0.78	0.6828	1.04	0.8587	0.83	0.9889
		dihydroorotate	C00337	HMDB03349	648	3.77	0.0003	0.6	0.123	0.33	0.0013
		orotate	C00295	HMDB00226	967	2.03	0.0319	1.08	0.7403	0.62	0.1171
		orotidine	C01103	HMDB00788	92751	0.58	0.0047	1.18	0.3403	0.96	0.8636
	Pyrimidine Metabolism, Uracil containing	uridine	C00299	HMDB00296	6029	2.06	0.4486	0.61	0.4554	1.04	0.9986
		uracil	C00106	HMDB00300	1174	2.1	0.8985	0.55	0.8475	0.51	0.6743
		pseudouridine	C02067	HMDB00767	15047	1	0.9716	0.95	0.6942	0.93	0.4848
		5-methyluridine (ribothymidine)		HMDB00884	445408	2.36	0.0088	0.52	0.0307	0.59	0.0411
		5,6-dihydrouracil	C00429	HMDB00076	649	0.95	0.3543	1.04	0.722	1.16	0.5079
		2'-deoxyuridine	C00526	HMDB00012	13712	1.31	0.2085	1.1	0.6549	0.94	0.8077
		3-ureidopropionate	C02642	HMDB00026	111	0.66	0.1616	1.75	0.1531	1.61	0.188
		N-acetyl-beta-alanine	C01073		76406	1.09	0.4038	0.87	0.2823	0.93	0.5372
	Pyrimidine Metabolism, Cytidine containing	cytidine	C00475	HMDB00089	6175	2.08	0.0017	0.75	0.1475	0.77	0.2233
		cytosine	C00380	HMDB00630	597	1.12	0.5292	0.73	0.3368	0.44	0.0302
		5-methylcytidine		HMDB00982	92918	1.57	0.0019	0.75	0.0411	0.65	0.0033
		N4-acetylcytidine		HMDB05923	107461	0.6	0.0202	1.15	0.5139	1.25	0.2938
		2'-deoxycytidine	C00881	HMDB00014	13711	0.9	0.4892	1.25	0.1902	1.28	0.1633
		5-methyl-2'-deoxycytidine	C03592	HMDB02224	440055	1.3	0.1555	0.95	0.8746	0.82	0.2935
	Pyrimidine Metabolism, Thymine containing	thymidine	C00214	HMDB00273	5789	1.22	0.4238	1.06	0.912	1.03	0.8443
		thymine	C00178	HMDB00262	1135	1.61	0.1972	0.72	0.3625	0.4	0.0097
Cofactors and Vitamins	Nicotinate and Nicotinamide Metabolism	quinolinate	C03722	HMDB00232	1066	1.43	0.3431	1.09	0.5887	0.54	0.0781
		nicotinate ribonucleoside	C05841	HMDB06809	161234	4.81	0.0114	0.3	0.0289	0.25	0.0195
		nicotinamide	C00153	HMDB01406	936	0.85	0.3574	0.61	0.0066	0.59	0.0047
		nicotinamide N-oxide		HMDB02730	72661	1.81	0.1152	0.59	0.1423	0.74	0.5116
		1-methylnicotinamide	C02918	HMDB00699	10129985	1.49	0.0173	0.67	0.0187	0.77	0.1126
		trigonelline (N'-methylnicotinate)	C01004	HMDB00875	5570	0.9	0.1594	0.96	0.4699	0.74	0.0006
		N1-Methyl-2-pyridone-5-carboxamide	C05842	HMDB04193	69698	1.67	1.0244e-05	0.65	0.0001	0.78	0.0105
		adenosine 5'-diphosphoribose (ADP-ribose)	C00301	HMDB01178	192	0.07	9.7304e-07	0.78	0.4911	0.72	0.6979
	Riboflavin Metabolism	flavin adenine dinucleotide (FAD)	C00016	HMDB01248	643975	0.95	0.7479	0.79	0.3223	0.97	0.9397
	Pantothenate and CoA Metabolism	pantothenate	C00864	HMDB00210	6613	0.52	9.0359e-05	1.39	0.0141	1.39	0.0177
	Ascorbate and Aldarate Metabolism	threonate	C01620	HMDB00943	151152	0.39	0.0001	1.34	0.1035	1.21	0.2445
		oxalate (ethanedioate)	C00209	HMDB02329	971	1.12	0.7183	1.14	0.2801	1.09	0.348
		gulonate*		HMDB03290	9794176	1.23	0.5199	0.95	0.4705	0.92	0.5461
	Tocopherol Metabolism	alpha-tocopherol	C02477	HMDB01893	14985	1.27	0.0108	1.19	0.0688	1.07	0.4684
		gamma-tocopherol/beta-tocopherol				5.71	3.8312e-09	0.5	0.0022	0.33	1.7863e-05
	Tetrahydrobiopterin Metabolism	biopterin	C06313	HMDB00468	445040	0.39	0.0005	1.02	0.9846	1.05	0.8522
		dihydrobiopterin	C00268	HMDB00038	1879	0.79	0.2706	1.02	0.9172	1.15	0.5053
	Hemoglobin and Porphyrin Metabolism	heme	C00032	HMDB03178	26945	0.23	1.3915e-06	0.79	0.4216	0.85	0.3847
		bilirubin (Z,Z)	C00486	HMDB00054	5280352	4.5	3.1794e-06	1.4	0.2796	1.39	0.2809
		bilirubin (E,E)*			5315454	6.88	7.8415e-07	1.51	0.2234	1.43	0.2492
		biliverdin	C00500	HMDB01008	5353439	1.99	0.0144	1.09	0.8605	1.18	0.5513
	Thiamine Metabolism	thiamin (Vitamin B1)	C00378	HMDB00235	1130	0.36	0.0027	0.86	0.4759	1.56	0.086
		thiamin monophosphate	C01081	HMDB02666	3382778	0.47	0.003	1.25	0.5644	0.87	0.5968
	Vitamin A Metabolism	retinol (Vitamin A)	C00473	HMDB00305	445354	1.27	0.1831	0.86	0.2932	0.92	0.6397
	Vitamin B6 Metabolism	pyridoxal	C00250	HMDB01545	1050	0.35	6.682e-07	2.35	6.0379e-06	3.5	9.6306e-09
		pyridoxate	C00847	HMDB00017	6723	1.09	0.4789	0.99	0.5236	1.18	0.3361
Xenobiotics	Benzoate Metabolism	hippurate	C01586	HMDB00714	464	2.09	0.057	1.09	0.8992	1.48	0.2183
		2-hydroxyhippurate (salicylurate)	C07588	HMDB00840	10253	0.04	0	1.31	0.2246	0.95	0.7418
		4-hydroxyhippurate		HMDB13678	151012	0.47	0.0143	1.26	0.3512	1.99	0.0643
		benzoate	C00180	HMDB01870	243	5.67	0.0002	0.82	0.4967	1.37	0.3627
		catechol sulfate	C00090	HMDB59724	3083879	0.55	0.0011	0.82	0.1732	0.53	0.0015
		O-methylcatechol sulfate			22473	1.15	0.7243	0.75	0.2697	0.58	0.0256
		3-methyl catechol sulfate (1)				0.08	0	1	1	1	1
		4-methylcatechol sulfate				0.16	0.0041	0.69	0.6773	1.07	0.3368
		p-hydroxybenzaldehyde	C00633	HMDB11718	126	0.12	1.2112e-10	1.24	0.3208	1.07	0.9387
		4-ethylphenylsulfate	C13637			0.28	0.0137	0.83	0.9107	1.35	0.712
		4-vinylphenol sulfate	C05627	HMDB04072	6426766	0.26	0.0219	0.73	0.3868	0.61	0.1589
		3-methoxycatechol sulfate (1)				0.17	2.9648e-05	0.62	0.7386	0.98	0.988
		3-methoxycatechol sulfate (2)				0.41	0.0023	0.78	0.6301	0.7	0.4018
		methyl-4-hydroxybenzoate sulfate				0.77	0.1592	1.02	0.5645	1.62	0.0455
	Xanthine Metabolism	caffeic acid sulfate		HMDB41708		0.36	0.0002	0.95	0.9636	0.5	0.0114
	Food Component/Plant	2-piperidinone			12665	0.72	0.0077	1.18	0.1694	0.8	0.13
		genistein	C06563	HMDB03217	5280961	1.67	0.0512	0.48	0.0065	0.36	0.0006
		2,3-dihydroxyisovalerate	C04039	HMDB12141	677	0.54	3.4564e-05	0.97	0.8571	0.99	0.951
		2-oxindole-3-acetate			3080590	0.65	0.0231	1.47	0.0483	1.25	0.2429
		betonicine	C08269	HMDB29412	164642	0.08	5.82e-13	1.39	0.0939	0.71	0.1989
		gluconate	C00257	HMDB00625	10690	0.48	0.009	1.36	0.2086	1.47	0.0739
		cinnamoylglycine		HMDB11621	709625	0.27	0.0205	0.62	0.5813	0.7	0.3739
		daidzein	C10208	HMDB03312	5281708	1.14	0.4873	0.53	0.0141	0.33	0.0002
		dihydroferulic acid			14340	0.53	0.0401	0.62	0.3867	0.62	0.3858
		equol glucuronide				0.52	0.0045	0.61	0.0314	0.53	0.0108
		equol sulfate				0.47	0.0004	0.85	0.245	0.71	0.0448
		ergothioneine	C05570	HMDB03045	3032311	0.09	3.8589e-10	1.18	0.9507	0.81	0.3517
		erythritol	C00503	HMDB02994	222285	1.45	0.0167	0.9	0.5152	0.67	0.0049
		ferulic acid 4-sulfate		HMDB29200	6305574	0.47	0.0195	0.72	0.4482	0.65	0.3487
		homostachydrine*	C08283	HMDB33433	441447	0.04	0	2.91	4.4441e-09	1.46	0.0035
		indoleacrylate		HMDB00734	15030923	0.86	0.3963	0.99	0.9223	0.74	0.2354
		methyl indole-3-acetate		HMDB29738	74706	0.46	5.2124e-07	0.88	0.3048	0.61	0.0008
		N-(2-furoyl)glycine		HMDB00439	21863	0.14	3.6027e-09	1.06	0.8639	1.03	0.9242
		N-glycolylneuraminate	C03410	HMDB00833	123802	0.41	0.0006	1.03	0.8011	0.77	0.3947
		quinate	C00296	HMDB03072	6508	0.04	1.0985e-09	0.83	0.791	0.24	0.0029
		stachydrine	C10172	HMDB04827	115244	0.12	0	1.65	8.679e-05	1.18	0.0952
		4-allylphenol sulfate				0.57	0.0047	0.6	0.0034	0.44	5.0973e-05
		methyl glucopyranoside (alpha + beta)				0.03	0	1.61	2.7037e-07	1.02	0.78
		pyrraline				0.27	5.1392e-06	1.43	0.1238	0.69	0.1736
		daidzein sulfate (2)				0.8	0.3748	0.91	0.5259	0.65	0.0492
		benzyl alcohol glucuronide			9795797	6.82	0.0034	0.83	0.7156	1.7	0.1685
		N-acetylpyrraline				0.2	3.6834e-08	1.43	0.0743	0.83	0.403
		daidzein sulfate (1)				0.42	0.0067	0.56	0.0592	0.45	0.0227
		2-keto-3-deoxy-gluconate		HMDB01353	161227	0.41	0.0277	1.34	0.697	0.96	0.379
	Bacterial/Fungal	tartronate (hydroxymalonate)	C02287	HMDB35227	45	0.39	0.0055	1.53	0.2472	1.84	0.0738
	Drug	4-acetylphenol sulfate			4684006	0.11	4.8118e-09	1.14	0.6253	1.46	0.253
		hydroquinone sulfate	C00530	HMDB02434	161220	0.59	0.0486	0.6	0.0624	0.41	0.0087
		salicylate	C00805	HMDB01895	338	0.17	2.3521e-11	0.75	0.0998	0.43	2.7663e-05
	Chemical	sulfate*	C00059	HMDB01448	1118	1.25	0.2172	1.1	0.4122	0.85	0.3106
		O-sulfo-L-tyrosine			514186	0.71	0.0638	1.14	0.4351	1.11	0.6743
		ethyl glucuronide			152226	5.9	5.2568e-07	1.49	0.1161	1.58	0.0217
		3-acetylphenol sulfate				0.38	0.0116	1.45	0.4	4.54	0.0036
		2-aminophenol sulfate		HMDB61116	181670	0.55	0.0062	0.71	0.0692	0.48	0.0021
		S-(3-hydroxypropyl)mercapturic acid (HPMA)			3371179	0.58	0.0085	1.17	0.3624	1.05	0.6638
		EDTA	C00284	HMDB15109	6049	0.7	0.0007	0.92	0.5342	0.98	0.9322
		HEPES			23831	21.98	8.9628e-06	1.37	0.3979	1.95	0.0324
		iminodiacetate (IDA)	C19911	HMDB11753	8897	0.7	0.0006	0.9	0.3464	0.97	0.8018
		N-methylpipecolate			11862129;11286529	0.41	1.4288e-05	1.45	0.0318	0.96	0.9474
		1,2,3-benzenetriol sulfate (2)				0.68	0.2405	0.42	0.4639	9.16	0.0127
		3-hydroxypyridine sulfate				0.04	6.813e-12	1.53	0.0686	0.83	0.5725
		3-hydroxyindolin-2-one sulfate				0.52	0.067	0.72	0.5572	0.73	0.4473
		6-hydroxyindole sulfate				0.5	0.0199	0.5	0.0588	0.57	0.1062
